# Supplementary material for: Temperature-dependent tRNA Modifications in Bacillales
Source: Preprints.org preprint supplement (doi:10.20944/preprints202407.1081.v1), 2024-07-12
Supplement: Supplementary file 1 [file supplementary]

## Sheet: Legend
Supplemental Table 3: RT-stop sites in the NaBH4-treated RNA seq data. Overview of all strongly enriched RT-stop sites found in the NaBH4-treated RNA seq data for each tRNA position investigated across different bacteria and growth temperatures. The sites are categorized based on 4-thiouridine (s4U), dihydrouridine (D), and 7-methyl-guanosine (m7G) modifications, as well as type I (Us and Gs) and…

## Sheet: P. halocryophilus
Species	Temperature	Cluster ID	tRNA sequence	Anticodon	tRNA position	tRNA area	REF	adj. P value	Fold change	# RTs	% RTs	Modification	Treatment
P. halocryophilus	20	cluster26	ggaggattagctcagctgggagagcatctgccttacaagcagagggtcggcggttcgatcccgtcatcctccaccacca	ValTAC	8	after 5' ACC-stem	T	0.00135406	1.47687	50.3333	2.08215	s4U	NaBH4
P. halocryophilus	20	cluster34	tggggtatagccaagcggtaaggcaacgggttttgatcccgtcatgccctggttcgaatccaggtaccccagccacca	GlnTTG	8	after 5' ACC-stem	T	1.44263363972444e-05	1.50064	149	5.8698	s4U	NaBH4
P. halocryophilus	10	cluster6	gcggtcgtggcgaagtggttaacgcaccggattgtgattccggcactcgggggttcaattcccctcgtccgccccacca	HisGTG	8	after 5' ACC-stem	T	0	2.55486	1188	59.4814	s4U	NaBH4
P. halocryophilus	20	cluster6	gcggtcgtggcgaagtggttaacgcaccggattgtgattccggcactcgggggttcaattcccctcgtccgccccacca	HisGTG	8	after 5' ACC-stem	T	0	2.97897	1567	51.566	s4U	NaBH4
P. halocryophilus	30	cluster6	gcggtcgtggcgaagtggttaacgcaccggattgtgattccggcactcgggggttcaattcccctcgtccgccccacca	HisGTG	8	after 5' ACC-stem	T	0	2.74809	2689	60.278	s4U	NaBH4
P. halocryophilus	30	cluster7	gccggcgtggcggaattggcagacgcgcgggactcaaaatcccgttccttcaccggagtgtcggttcgaccccgaccgccggtaccacca	LeuCAA	8	after 5' ACC-stem	T	0.00248489	1.23199	50.6667	2.38388	s4U	NaBH4
P. halocryophilus	10	cluster10	gggtcagtagctcagtcggtagagcattagattgaagctctaagtgtcggcggttcgattccgtcctgacccaccacca	PheGAA	46	V-region	G	0	3.96367	2767	9.14333	m7G	NaBH4
P. halocryophilus	20	cluster10	gggtcagtagctcagtcggtagagcattagattgaagctctaagtgtcggcggttcgattccgtcctgacccaccacca	PheGAA	46	V-region	G	0	4.31022	3059.33	9.74507	m7G	NaBH4
P. halocryophilus	30	cluster10	gggtcagtagctcagtcggtagagcattagattgaagctctaagtgtcggcggttcgattccgtcctgacccaccacca	PheGAA	46	V-region	G	0	4.55613	5169.67	11.2902	m7G	NaBH4
P. halocryophilus	10	cluster11	gcgcccgtagctcaattggatagagtacttgactacgaatcaagcggttagaggttcgagtcctctcgggcgcaccacca	ArgACG	46	V-region	G	0	4.52161	8780.33	40.0621	m7G	NaBH4
P. halocryophilus	20	cluster11	gcgcccgtagctcaattggatagagtacttgactacgaatcaagcggttagaggttcgagtcctctcgggcgcaccacca	ArgACG	46	V-region	G	0	4.63319	10120.3	41.5688	m7G	NaBH4
P. halocryophilus	30	cluster11	gcgcccgtagctcaattggatagagtacttgactacgaatcaagcggttagaggttcgagtcctctcgggcgcaccacca	ArgACG	46	V-region	G	0	4.39146	9624.33	42.1648	m7G	NaBH4
P. halocryophilus	10	cluster15	gtctcagtagctcagctggatagagcaacgcccttctaaggcgtcggtcgggggttcgaatccctcctgggacaccacca	ArgTCT	46	V-region	G	0	4.10427	3024.67	31.8539	m7G	NaBH4
P. halocryophilus	20	cluster15	gtctcagtagctcagctggatagagcaacgcccttctaaggcgtcggtcgggggttcgaatccctcctgggacaccacca	ArgTCT	46	V-region	G	0	5.41103	3122.33	37.0555	m7G	NaBH4
P. halocryophilus	30	cluster15	gtctcagtagctcagctggatagagcaacgcccttctaaggcgtcggtcgggggttcgaatccctcctgggacaccacca	ArgTCT	46	V-region	G	0	4.53607	4455.33	38.1238	m7G	NaBH4
P. halocryophilus	10	cluster16	gagccattagctcagctggtagagcatctgacttttaatcagagggtcgaaggttcgaatccttcatggctcaccacca	LysTTT	46	V-region	G	0	5.33356	22908	30.0491	m7G	NaBH4
P. halocryophilus	20	cluster16	gagccattagctcagctggtagagcatctgacttttaatcagagggtcgaaggttcgaatccttcatggctcaccacca	LysTTT	46	V-region	G	0	6.13103	23479	35.1283	m7G	NaBH4
P. halocryophilus	30	cluster16	gagccattagctcagctggtagagcatctgacttttaatcagagggtcgaaggttcgaatccttcatggctcaccacca	LysTTT	46	V-region	G	0	5.35326	16422.3	33.9656	m7G	NaBH4
P. halocryophilus	10	cluster17	gccggagtagctcagttggtagagcaactgacttgtaatcagtaggtcgagggttcgactcctttctccggcaccacca	ThrTGT-1	46	V-region	G	0	5.40963	5890	15.6303	m7G	NaBH4
P. halocryophilus	20	cluster17	gccggagtagctcagttggtagagcaactgacttgtaatcagtaggtcgagggttcgactcctttctccggcaccacca	ThrTGT-1	46	V-region	G	0	5.86799	4338.67	15.7841	m7G	NaBH4
P. halocryophilus	30	cluster17	gccggagtagctcagttggtagagcaactgacttgtaatcagtaggtcgagggttcgactcctttctccggcaccacca	ThrTGT-1	46	V-region	G	0	5.86537	6767	19.005	m7G	NaBH4
P. halocryophilus	10	cluster18	cgggaagtagctcagcttggtagagcacttggtttgggaccaaggggtcgcaggttcgaatcctgtcttcccgaccacca	ProTGG	46	V-region	G	0	5.73293	10310.7	17.9421	m7G	NaBH4
P. halocryophilus	20	cluster18	cgggaagtagctcagcttggtagagcacttggtttgggaccaaggggtcgcaggttcgaatcctgtcttcccgaccacca	ProTGG	46	V-region	G	0	6.05102	10782	17.9453	m7G	NaBH4
P. halocryophilus	30	cluster18	cgggaagtagctcagcttggtagagcacttggtttgggaccaaggggtcgcaggttcgaatcctgtcttcccgaccacca	ProTGG	46	V-region	G	0	6.24516	11485	19.9329	m7G	NaBH4
P. halocryophilus	10	cluster2	gcttccatagctcagcaggtagagtgcttccatggtaaggaagaggtcaccggttcgaatccggttggaagctccacca	ThrGGT	46	V-region	G	0	3.61113	416.333	20.1455	m7G	NaBH4
P. halocryophilus	20	cluster2	gcttccatagctcagcaggtagagtgcttccatggtaaggaagaggtcaccggttcgaatccggttggaagctccacca	ThrGGT	46	V-region	G	0	4.18189	347	22.2249	m7G	NaBH4
P. halocryophilus	30	cluster2	gcttccatagctcagcaggtagagtgcttccatggtaaggaagaggtcaccggttcgaatccggttggaagctccacca	ThrGGT	46	V-region	G	0	3.41274	386.667	13.2494	m7G	NaBH4
P. halocryophilus	10	cluster21	gcggaagtagttcagtggtagaacgccaccttgccaaggtggaggtcgcgagttcgaacctcgtcttccgctccacca	GlyGCC	46	V-region	G	0	5.02499	4932.33	26.8014	m7G	NaBH4
P. halocryophilus	20	cluster21	gcggaagtagttcagtggtagaacgccaccttgccaaggtggaggtcgcgagttcgaacctcgtcttccgctccacca	GlyGCC	46	V-region	G	0	5.93559	3145.67	31.784	m7G	NaBH4
P. halocryophilus	30	cluster21	gcggaagtagttcagtggtagaacgccaccttgccaaggtggaggtcgcgagttcgaacctcgtcttccgctccacca	GlyGCC	46	V-region	G	0	5.62015	11866	30.3221	m7G	NaBH4
P. halocryophilus	10	cluster22	cgcggggtggagcagttcggtagctcgttgggctcataacccaaaggtcgcaggttcaaatcctgcccccgcaaccacca	MetCAT-3	46	V-region	G	0	6.07207	19544	26.4368	m7G	NaBH4
P. halocryophilus	20	cluster22	cgcggggtggagcagttcggtagctcgttgggctcataacccaaaggtcgcaggttcaaatcctgcccccgcaaccacca	MetCAT-3	46	V-region	G	0	6.34188	11146	21.8106	m7G	NaBH4
P. halocryophilus	30	cluster22	cgcggggtggagcagttcggtagctcgttgggctcataacccaaaggtcgcaggttcaaatcctgcccccgcaaccacca	MetCAT-3	46	V-region	G	0	4.76222	4754	10.1279	m7G	NaBH4
P. halocryophilus	10	cluster24	tccgaagtagctcagtggtagagcaccgcactgttaatgcgatggtcgtaggttcgagtcctaccttcggagccacca	AsnGTT	46	V-region	G	0	5.59087	6117.33	20.096	m7G	NaBH4
P. halocryophilus	20	cluster24	tccgaagtagctcagtggtagagcaccgcactgttaatgcgatggtcgtaggttcgagtcctaccttcggagccacca	AsnGTT	46	V-region	G	0	6.17272	8253	20.9778	m7G	NaBH4
P. halocryophilus	30	cluster24	tccgaagtagctcagtggtagagcaccgcactgttaatgcgatggtcgtaggttcgagtcctaccttcggagccacca	AsnGTT	46	V-region	G	0	6.11636	11701.3	24.0086	m7G	NaBH4
P. halocryophilus	10	cluster26	ggaggattagctcagctgggagagcatctgccttacaagcagagggtcggcggttcgatcccgtcatcctccaccacca	ValTAC	46	V-region	G	0	5.093	3176.33	21.0279	m7G	NaBH4
P. halocryophilus	20	cluster26	ggaggattagctcagctgggagagcatctgccttacaagcagagggtcggcggttcgatcccgtcatcctccaccacca	ValTAC	46	V-region	G	0	5.38568	2320.33	21.8112	m7G	NaBH4
P. halocryophilus	30	cluster26	ggaggattagctcagctgggagagcatctgccttacaagcagagggtcggcggttcgatcccgtcatcctccaccacca	ValTAC	46	V-region	G	0	5.22126	4091.67	25.8662	m7G	NaBH4
P. halocryophilus	10	cluster27	gggcctatagctcagctggttagagcgcacgcctgataagcgtgaggtcgatggttcgagtccatttaggcccaccacca	IleGAT	46	V-region	G	0	4.89785	8053	11.5718	m7G	NaBH4
P. halocryophilus	20	cluster27	gggcctatagctcagctggttagagcgcacgcctgataagcgtgaggtcgatggttcgagtccatttaggcccaccacca	IleGAT	46	V-region	G	0	5.5699	9142.67	12.7846	m7G	NaBH4
P. halocryophilus	30	cluster27	gggcctatagctcagctggttagagcgcacgcctgataagcgtgaggtcgatggttcgagtccatttaggcccaccacca	IleGAT	46	V-region	G	0	5.61249	14031.3	13.219	m7G	NaBH4
P. halocryophilus	10	cluster28	gccggagtagctcaactggtagagcaactgacttgtaatcagtaggttgagggttcaagtcctttctccggcaccacca	ThrTGT-2	46	V-region	G	0	5.94207	5152.67	27.1189	m7G	NaBH4
P. halocryophilus	20	cluster28	gccggagtagctcaactggtagagcaactgacttgtaatcagtaggttgagggttcaagtcctttctccggcaccacca	ThrTGT-2	46	V-region	G	0	6.4483	8744.67	37.2111	m7G	NaBH4
P. halocryophilus	30	cluster28	gccggagtagctcaactggtagagcaactgacttgtaatcagtaggttgagggttcaagtcctttctccggcaccacca	ThrTGT-2	46	V-region	G	0	5.93552	4620.67	29.018	m7G	NaBH4
P. halocryophilus	10	cluster30	ggggccttagctcagctgggagagcgcctgccttgcacgcaggaggtcagcggttcgatcccgctaggctccaccacca	AlaTGC	46	V-region	G	0	6.22914	4871	20.8579	m7G	NaBH4
P. halocryophilus	20	cluster30	ggggccttagctcagctgggagagcgcctgccttgcacgcaggaggtcagcggttcgatcccgctaggctccaccacca	AlaTGC	46	V-region	G	0	6.5863	4120	24.9265	m7G	NaBH4
P. halocryophilus	30	cluster30	ggggccttagctcagctgggagagcgcctgccttgcacgcaggaggtcagcggttcgatcccgctaggctccaccacca	AlaTGC	46	V-region	G	0	5.97548	4122.33	15.7653	m7G	NaBH4
P. halocryophilus	10	cluster33	ggtctgttagctcagcgggagagcacttcgttgacatcgaaggggtcgctggttcgatcccagtacagaccaccacca	ValGAC	46	V-region	G	0	4.4053	227.333	24.1163	m7G	NaBH4
P. halocryophilus	20	cluster33	ggtctgttagctcagcgggagagcacttcgttgacatcgaaggggtcgctggttcgatcccagtacagaccaccacca	ValGAC	46	V-region	G	0	4.46059	383.667	30.912	m7G	NaBH4
P. halocryophilus	30	cluster33	ggtctgttagctcagcgggagagcacttcgttgacatcgaaggggtcgctggttcgatcccagtacagaccaccacca	ValGAC	46	V-region	G	0	4.75812	579.667	23.7178	m7G	NaBH4
P. halocryophilus	10	cluster4	ggacctttagctcagttggttagagcagacggctcataaccgtccggtcgcaggttcgagtcctgcaaggtccaccacca	MetCAT-1	46	V-region	G	0	5.87486	3651	15.7034	m7G	NaBH4
P. halocryophilus	20	cluster4	ggacctttagctcagttggttagagcagacggctcataaccgtccggtcgcaggttcgagtcctgcaaggtccaccacca	MetCAT-1	46	V-region	G	0	6.3102	3942.33	15.1468	m7G	NaBH4
P. halocryophilus	30	cluster4	ggacctttagctcagttggttagagcagacggctcataaccgtccggtcgcaggttcgagtcctgcaaggtccaccacca	MetCAT-1	46	V-region	G	0	5.73907	3049.33	17.9659	m7G	NaBH4
P. halocryophilus	10	cluster9	ggcggcgtagctcagctggctagagcgtacggttcatacccgtgaggtcgggggttcgatcccctctgccgccaccacca	MetCAT-2	46	V-region	G	0	3.89781	6089	22.0807	m7G	NaBH4
P. halocryophilus	20	cluster9	ggcggcgtagctcagctggctagagcgtacggttcatacccgtgaggtcgggggttcgatcccctctgccgccaccacca	MetCAT-2	46	V-region	G	0	4.3275	3888	24.1931	m7G	NaBH4
P. halocryophilus	30	cluster9	ggcggcgtagctcagctggctagagcgtacggttcatacccgtgaggtcgggggttcgatcccctctgccgccaccacca	MetCAT-2	46	V-region	G	0	4.60179	5901.67	26.6183	m7G	NaBH4
P. halocryophilus	20	cluster10	gggtcagtagctcagtcggtagagcattagattgaagctctaagtgtcggcggttcgattccgtcctgacccaccacca	PheGAA	5	5' ACC-stem	C	2.35393380914272e-05	1.30113	179	2.23891	FP type II	NaBH4
P. halocryophilus	20	cluster16	gagccattagctcagctggtagagcatctgacttttaatcagagggtcgaaggttcgaatccttcatggctcaccacca	LysTTT	11	5' D-stem	C	2.5585198445063e-07	1.74898	155	2.71981	FP type II	NaBH4
P. halocryophilus	10	cluster17	gccggagtagctcagttggtagagcaactgacttgtaatcagtaggtcgagggttcgactcctttctccggcaccacca	ThrTGT-1	11	5' D-stem	C	0	2.80822	379.667	2.80205	FP type II	NaBH4
P. halocryophilus	20	cluster17	gccggagtagctcagttggtagagcaactgacttgtaatcagtaggtcgagggttcgactcctttctccggcaccacca	ThrTGT-1	11	5' D-stem	C	0	3.09712	254.333	2.62957	FP type II	NaBH4
P. halocryophilus	30	cluster17	gccggagtagctcagttggtagagcaactgacttgtaatcagtaggtcgagggttcgactcctttctccggcaccacca	ThrTGT-1	11	5' D-stem	C	0	2.64708	284	2.3976	FP type II	NaBH4
P. halocryophilus	20	cluster26	ggaggattagctcagctgggagagcatctgccttacaagcagagggtcggcggttcgatcccgtcatcctccaccacca	ValTAC	11	5' D-stem	C	3.2994911476197e-06	1.84989	67	2.69023	FP type II	NaBH4
P. halocryophilus	10	cluster28	gccggagtagctcaactggtagagcaactgacttgtaatcagtaggttgagggttcaagtcctttctccggcaccacca	ThrTGT-2	11	5' D-stem	C	0.000395126	1.69164	91	2.29216	FP type II	NaBH4
P. halocryophilus	20	cluster28	gccggagtagctcaactggtagagcaactgacttgtaatcagtaggttgagggttcaagtcctttctccggcaccacca	ThrTGT-2	11	5' D-stem	C	1.3017257187098e-08	2.3509	108.333	2.35118	FP type II	NaBH4
P. halocryophilus	30	cluster28	gccggagtagctcaactggtagagcaactgacttgtaatcagtaggttgagggttcaagtcctttctccggcaccacca	ThrTGT-2	11	5' D-stem	C	0.00434982	1.26145	71	2.17604	FP type II	NaBH4
P. halocryophilus	10	cluster7	gccggcgtggcggaattggcagacgcgcgggactcaaaatcccgttccttcaccggagtgtcggttcgaccccgaccgccggtaccacca	LeuCAA	11	5' D-stem	C	0.00513801	1.41316	62.6667	10.8246	FP type II	NaBH4
P. halocryophilus	20	cluster7	gccggcgtggcggaattggcagacgcgcgggactcaaaatcccgttccttcaccggagtgtcggttcgaccccgaccgccggtaccacca	LeuCAA	11	5' D-stem	C	0.00135406	1.4938	43.6667	8.62334	FP type II	NaBH4
P. halocryophilus	30	cluster7	gccggcgtggcggaattggcagacgcgcgggactcaaaatcccgttccttcaccggagtgtcggttcgaccccgaccgccggtaccacca	LeuCAA	11	5' D-stem	C	4.36181779345235e-05	1.96301	96.6667	4.02123	FP type II	NaBH4
P. halocryophilus	10	cluster16	gagccattagctcagctggtagagcatctgacttttaatcagagggtcgaaggttcgaatccttcatggctcaccacca	LysTTT	13	5' D-stem	C	0	3.56059	1681.67	15.6468	FP type II	NaBH4
P. halocryophilus	20	cluster16	gagccattagctcagctggtagagcatctgacttttaatcagagggtcgaaggttcgaatccttcatggctcaccacca	LysTTT	13	5' D-stem	C	0	3.72569	1292.33	18.117	FP type II	NaBH4
P. halocryophilus	30	cluster16	gagccattagctcagctggtagagcatctgacttttaatcagagggtcgaaggttcgaatccttcatggctcaccacca	LysTTT	13	5' D-stem	C	0	2.85785	857	14.9484	FP type II	NaBH4
P. halocryophilus	20	cluster21	gcggaagtagttcagtggtagaacgccaccttgccaaggtggaggtcgcgagttcgaacctcgtcttccgctccacca	GlyGCC	13	5' D-stem	C	2.27251020449252e-05	1.72591	81.6667	3.80632	FP type II	NaBH4
P. halocryophilus	20	cluster22	cgcggggtggagcagttcggtagctcgttgggctcataacccaaaggtcgcaggttcaaatcctgcccccgcaaccacca	MetCAT-3	13	5' D-stem	C	0	2.60257	347.333	2.39102	FP type II	NaBH4
P. halocryophilus	20	cluster26	ggaggattagctcagctgggagagcatctgccttacaagcagagggtcggcggttcgatcccgtcatcctccaccacca	ValTAC	13	5' D-stem	C	1.3017257187098e-08	2.16889	109.333	4.10795	FP type II	NaBH4
P. halocryophilus	20	cluster20	gccggggtggcggaactggcagacgcacaggacttaaaatcctgcggtaggtgactaccgtaccggttcgattccggtcctcggcaccacca	LeuTAA	15	D-loop	A	0.00135406	1.40747	43.6667	7.16943	FP type II	NaBH4
P. halocryophilus	10	cluster1	ggcggcatagccaagtggtaaggcatgggtctgcaacacccttatcaccggttcgagtccggttgccgcctccacca	CysGCA	21	D-loop	A	0	2.28304	495.333	9.27648	FP type II	NaBH4
P. halocryophilus	20	cluster1	ggcggcatagccaagtggtaaggcatgggtctgcaacacccttatcaccggttcgagtccggttgccgcctccacca	CysGCA	21	D-loop	A	2.3015245124112e-10	2.1025	205.333	9.23698	FP type II	NaBH4
P. halocryophilus	30	cluster1	ggcggcatagccaagtggtaaggcatgggtctgcaacacccttatcaccggttcgagtccggttgccgcctccacca	CysGCA	21	D-loop	A	0	2.12552	433.333	9.27046	FP type II	NaBH4
P. halocryophilus	10	cluster14	ggccccttggtcaagcggttaagacaccgccctttcacggcggtaacacgggttcgaatcccgtaggggtcaccacca	GluTTC	21	D-loop	A	0	2.63649	8348.67	24.4509	FP type II	NaBH4
P. halocryophilus	20	cluster14	ggccccttggtcaagcggttaagacaccgccctttcacggcggtaacacgggttcgaatcccgtaggggtcaccacca	GluTTC	21	D-loop	A	0	2.18799	6080.67	17.9717	FP type II	NaBH4
P. halocryophilus	30	cluster14	ggccccttggtcaagcggttaagacaccgccctttcacggcggtaacacgggttcgaatcccgtaggggtcaccacca	GluTTC	21	D-loop	A	0	2.58071	8707.67	25.3005	FP type II	NaBH4
P. halocryophilus	10	cluster34	tggggtatagccaagcggtaaggcaacgggttttgatcccgtcatgccctggttcgaatccaggtaccccagccacca	GlnTTG	21	D-loop	A	0	1.38815	2237.33	27.1285	FP type II	NaBH4
P. halocryophilus	20	cluster34	tggggtatagccaagcggtaaggcaacgggttttgatcccgtcatgccctggttcgaatccaggtaccccagccacca	GlnTTG	21	D-loop	A	0	1.05207	1263	23.2585	FP type II	NaBH4
P. halocryophilus	30	cluster34	tggggtatagccaagcggtaaggcaacgggttttgatcccgtcatgccctggttcgaatccaggtaccccagccacca	GlnTTG	21	D-loop	A	0	1.39124	1477.67	28.5874	FP type II	NaBH4
P. halocryophilus	10	cluster6	gcggtcgtggcgaagtggttaacgcaccggattgtgattccggcactcgggggttcaattcccctcgtccgccccacca	HisGTG	21	D-loop	A	0	2.07978	1855.67	26.7317	FP type II	NaBH4
P. halocryophilus	20	cluster6	gcggtcgtggcgaagtggttaacgcaccggattgtgattccggcactcgggggttcaattcccctcgtccgccccacca	HisGTG	21	D-loop	A	0	2.50138	2910.67	27.3942	FP type II	NaBH4
P. halocryophilus	30	cluster6	gcggtcgtggcgaagtggttaacgcaccggattgtgattccggcactcgggggttcaattcccctcgtccgccccacca	HisGTG	21	D-loop	A	0	2.10072	3903	26.6635	FP type II	NaBH4
P. halocryophilus	10	cluster6	gcggtcgtggcgaagtggttaacgcaccggattgtgattccggcactcgggggttcaattcccctcgtccgccccacca	HisGTG	23	3' D-stem	C	0	2.4629	2617	19.7163	FP type II	NaBH4
P. halocryophilus	20	cluster6	gcggtcgtggcgaagtggttaacgcaccggattgtgattccggcactcgggggttcaattcccctcgtccgccccacca	HisGTG	23	3' D-stem	C	0	2.57465	3270	17.316	FP type II	NaBH4
P. halocryophilus	30	cluster6	gcggtcgtggcgaagtggttaacgcaccggattgtgattccggcactcgggggttcaattcccctcgtccgccccacca	HisGTG	23	3' D-stem	C	0	2.66939	5707	20.4566	FP type II	NaBH4
P. halocryophilus	20	cluster34	tggggtatagccaagcggtaaggcaacgggttttgatcccgtcatgccctggttcgaatccaggtaccccagccacca	GlnTTG	25	3' D-stem	C	4.77642998226464e-10	1.87408	239.667	3.68531	FP type II	NaBH4
P. halocryophilus	20	cluster10	gggtcagtagctcagtcggtagagcattagattgaagctctaagtgtcggcggttcgattccgtcctgacccaccacca	PheGAA	26	after 3' D-stem	A	2.05499002718381e-14	1.65468	452.333	3.08264	FP type II	NaBH4
P. halocryophilus	20	cluster34	tggggtatagccaagcggtaaggcaacgggttttgatcccgtcatgccctggttcgaatccaggtaccccagccacca	GlnTTG	26	after 3' D-stem	A	1.63279608926603e-07	1.80642	138.667	2.1232	FP type II	NaBH4
P. halocryophilus	20	cluster11	gcgcccgtagctcaattggatagagtacttgactacgaatcaagcggttagaggttcgagtcctctcgggcgcaccacca	ArgACG	27	5' AC-stem	C	9.90712439606622e-08	1.42547	288	3.04468	FP type II	NaBH4
P. halocryophilus	20	cluster16	gagccattagctcagctggtagagcatctgacttttaatcagagggtcgaaggttcgaatccttcatggctcaccacca	LysTTT	28	5' AC-stem	C	0	1.89584	1058.33	3.89284	FP type II	NaBH4
P. halocryophilus	20	cluster21	gcggaagtagttcagtggtagaacgccaccttgccaaggtggaggtcgcgagttcgaacctcgtcttccgctccacca	GlyGCC	28	5' AC-stem	C	3.93783303635168e-06	2.07064	87.6667	2.03085	FP type II	NaBH4
P. halocryophilus	20	cluster26	ggaggattagctcagctgggagagcatctgccttacaagcagagggtcggcggttcgatcccgtcatcctccaccacca	ValTAC	28	5' AC-stem	C	2.85649640142266e-15	2.47542	217	5.00383	FP type II	NaBH4
P. halocryophilus	20	cluster31	gcgggtgtagtttagtggtaaaacctcagccttccaagctgatgatgggggttcgattccccccacccgctccacca	GlyTCC-1	28	5' AC-stem	C	3.69560829718148e-11	2.31399	174	2.61277	FP type II	NaBH4
P. halocryophilus	20	cluster34	tggggtatagccaagcggtaaggcaacgggttttgatcccgtcatgccctggttcgaatccaggtaccccagccacca	GlnTTG	28	5' AC-stem	C	6.19558230918489e-12	2.62486	165	2.37698	FP type II	NaBH4
P. halocryophilus	20	cluster35	gcgggtgtagtttagtggtaaaacctcagccttccaagctgatgatgagggttcgattcccttcacccgctccacca	GlyTCC-2	28	5' AC-stem	C	1.44263363972444e-05	1.46395	144.667	2.87606	FP type II	NaBH4
P. halocryophilus	20	cluster10	gggtcagtagctcagtcggtagagcattagattgaagctctaagtgtcggcggttcgattccgtcctgacccaccacca	PheGAA	31	5' AC-stem	A	6.43757478751582e-14	1.45148	525.667	3.20553	FP type II	NaBH4
P. halocryophilus	10	cluster26	ggaggattagctcagctgggagagcatctgccttacaagcagagggtcggcggttcgatcccgtcatcctccaccacca	ValTAC	32	AC-loop	C	0.00221985	1.1137	163.667	2.05865	FP type II	NaBH4
P. halocryophilus	20	cluster26	ggaggattagctcagctgggagagcatctgccttacaagcagagggtcggcggttcgatcccgtcatcctccaccacca	ValTAC	32	AC-loop	C	1.22725804879886e-14	2.23852	254	5.25957	FP type II	NaBH4
P. halocryophilus	20	cluster30	ggggccttagctcagctgggagagcgcctgccttgcacgcaggaggtcagcggttcgatcccgctaggctccaccacca	AlaTGC	32	AC-loop	C	0	2.43387	274	3.04253	FP type II	NaBH4
P. halocryophilus	20	cluster31	gcgggtgtagtttagtggtaaaacctcagccttccaagctgatgatgggggttcgattccccccacccgctccacca	GlyTCC-1	32	AC-loop	C	2.65876306411529e-08	1.7108	209.333	3.01649	FP type II	NaBH4
P. halocryophilus	20	cluster35	gcgggtgtagtttagtggtaaaacctcagccttccaagctgatgatgagggttcgattcccttcacccgctccacca	GlyTCC-2	32	AC-loop	C	3.03913017371685e-05	1.28942	166.333	3.05143	FP type II	NaBH4
P. halocryophilus	20	cluster25	gccctcgtagtgtaatggatcacacgtaagattccggttcttgaaatggaggttcgattccttccgagggcaccacca	ArgCCG	34	AC-loop	C	1.71015919115173e-11	2.61893	103.667	4.20819	FP type II	NaBH4
P. halocryophilus	30	cluster25	gccctcgtagtgtaatggatcacacgtaagattccggttcttgaaatggaggttcgattccttccgagggcaccacca	ArgCCG	34	AC-loop	C	0	4.05233	464.333	10.3943	FP type II	NaBH4
P. halocryophilus	10	cluster9	ggcggcgtagctcagctggctagagcgtacggttcatacccgtgaggtcgggggttcgatcccctctgccgccaccacca	MetCAT-2	34	AC-loop	C	0	3.56471	6990.33	35.7038	FP type II	NaBH4
P. halocryophilus	20	cluster9	ggcggcgtagctcagctggctagagcgtacggttcatacccgtgaggtcgggggttcgatcccctctgccgccaccacca	MetCAT-2	34	AC-loop	C	0	4.68205	5262.67	50.733	FP type II	NaBH4
P. halocryophilus	30	cluster9	ggcggcgtagctcagctggctagagcgtacggttcatacccgtgaggtcgggggttcgatcccctctgccgccaccacca	MetCAT-2	34	AC-loop	C	0	3.30883	5287.33	36.5563	FP type II	NaBH4
P. halocryophilus	20	cluster10	gggtcagtagctcagtcggtagagcattagattgaagctctaagtgtcggcggttcgattccgtcctgacccaccacca	PheGAA	35	AC-loop	A	2.77732170087595e-09	1.15741	497	2.71513	FP type II	NaBH4
P. halocryophilus	20	cluster22	cgcggggtggagcagttcggtagctcgttgggctcataacccaaaggtcgcaggttcaaatcctgcccccgcaaccacca	MetCAT-3	35	AC-loop	A	0	1.74387	1117	3.35423	FP type II	NaBH4
P. halocryophilus	20	cluster9	ggcggcgtagctcagctggctagagcgtacggttcatacccgtgaggtcgggggttcgatcccctctgccgccaccacca	MetCAT-2	35	AC-loop	A	2.03760734315896e-09	1.56194	268.667	2.53593	FP type II	NaBH4
P. halocryophilus	20	cluster26	ggaggattagctcagctgggagagcatctgccttacaagcagagggtcggcggttcgatcccgtcatcctccaccacca	ValTAC	36	AC-loop	C	0	1.73516	550	7.68977	FP type II	NaBH4
P. halocryophilus	20	cluster24	tccgaagtagctcagtggtagagcaccgcactgttaatgcgatggtcgtaggttcgagtcctaccttcggagccacca	AsnGTT	37	AC-loop	A	0	1.27318	1201.67	4.34644	FP type II	NaBH4
P. halocryophilus	20	cluster26	ggaggattagctcagctgggagagcatctgccttacaagcagagggtcggcggttcgatcccgtcatcctccaccacca	ValTAC	37	AC-loop	A	5.72634961591086e-10	2.13279	192.667	2.58035	FP type II	NaBH4
P. halocryophilus	10	cluster27	gggcctatagctcagctggttagagcgcacgcctgataagcgtgaggtcgatggttcgagtccatttaggcccaccacca	IleGAT	37	AC-loop	A	0	1.19199	2611	4.52522	FP type II	NaBH4
P. halocryophilus	20	cluster27	gggcctatagctcagctggttagagcgcacgcctgataagcgtgaggtcgatggttcgagtccatttaggcccaccacca	IleGAT	37	AC-loop	A	0	1.3495	2159	3.81364	FP type II	NaBH4
P. halocryophilus	30	cluster27	gggcctatagctcagctggttagagcgcacgcctgataagcgtgaggtcgatggttcgagtccatttaggcccaccacca	IleGAT	37	AC-loop	A	0	1.06436	4089	4.71994	FP type II	NaBH4
P. halocryophilus	20	cluster31	gcgggtgtagtttagtggtaaaacctcagccttccaagctgatgatgggggttcgattccccccacccgctccacca	GlyTCC-1	37	AC-loop	A	7.53741369795129e-07	1.43595	219.667	2.46867	FP type II	NaBH4
P. halocryophilus	20	cluster35	gcgggtgtagtttagtggtaaaacctcagccttccaagctgatgatgagggttcgattcccttcacccgctccacca	GlyTCC-2	37	AC-loop	A	2.85276993185461e-06	1.49954	198	2.92094	FP type II	NaBH4
P. halocryophilus	20	cluster10	gggtcagtagctcagtcggtagagcattagattgaagctctaagtgtcggcggttcgattccgtcctgacccaccacca	PheGAA	40	3' AC-stem	C	0	1.8173	677.667	2.78421	FP type II	NaBH4
P. halocryophilus	20	cluster17	gccggagtagctcagttggtagagcaactgacttgtaatcagtaggtcgagggttcgactcctttctccggcaccacca	ThrTGT-1	40	3' AC-stem	C	0	1.93087	1325.67	6.24659	FP type II	NaBH4
P. halocryophilus	20	cluster26	ggaggattagctcagctgggagagcatctgccttacaagcagagggtcggcggttcgatcccgtcatcctccaccacca	ValTAC	40	3' AC-stem	C	2.19756935076478e-10	2.30262	169.333	2.22319	FP type II	NaBH4
P. halocryophilus	20	cluster28	gccggagtagctcaactggtagagcaactgacttgtaatcagtaggttgagggttcaagtcctttctccggcaccacca	ThrTGT-2	40	3' AC-stem	C	2.18587986180295e-14	1.50347	527	4.19632	FP type II	NaBH4
P. halocryophilus	30	cluster28	gccggagtagctcaactggtagagcaactgacttgtaatcagtaggttgagggttcaagtcctttctccggcaccacca	ThrTGT-2	40	3' AC-stem	C	1.13452778648225e-08	1.26379	511.333	4.89463	FP type II	NaBH4
P. halocryophilus	20	cluster22	cgcggggtggagcagttcggtagctcgttgggctcataacccaaaggtcgcaggttcaaatcctgcccccgcaaccacca	MetCAT-3	41	3' AC-stem	C	0	2.87954	1085.33	2.90151	FP type II	NaBH4
P. halocryophilus	20	cluster5	aggggcatagtttaacggtagaacagaggtctccaacacctccgatgtgggttcgattcctactgcccctgccacca	TrpCCA	41	3' AC-stem	C	0.00017396	1.44741	117.667	2.24108	FP type II	NaBH4
P. halocryophilus	10	cluster10	gggtcagtagctcagtcggtagagcattagattgaagctctaagtgtcggcggttcgattccgtcctgacccaccacca	PheGAA	43	3' AC-stem	A	0	2.51635	765	2.94174	FP type II	NaBH4
P. halocryophilus	20	cluster10	gggtcagtagctcagtcggtagagcattagattgaagctctaagtgtcggcggttcgattccgtcctgacccaccacca	PheGAA	43	3' AC-stem	A	0	2.48564	795	2.98438	FP type II	NaBH4
P. halocryophilus	30	cluster10	gggtcagtagctcagtcggtagagcattagattgaagctctaagtgtcggcggttcgattccgtcctgacccaccacca	PheGAA	43	3' AC-stem	A	0	2.83655	1345.33	3.4791	FP type II	NaBH4
P. halocryophilus	20	cluster35	gcgggtgtagtttagtggtaaaacctcagccttccaagctgatgatgagggttcgattcccttcacccgctccacca	GlyTCC-2	43	3' AC-stem	A	4.79408295814401e-11	2.02096	208.333	2.70695	FP type II	NaBH4
P. halocryophilus	20	cluster11	gcgcccgtagctcaattggatagagtacttgactacgaatcaagcggttagaggttcgagtcctctcgggcgcaccacca	ArgACG	44	V-region	C	4.75421745103939e-05	1.04445	271.667	2.05043	FP type II	NaBH4
P. halocryophilus	20	cluster1	ggcggcatagccaagtggtaaggcatgggtctgcaacacccttatcaccggttcgagtccggttgccgcctccacca	CysGCA	45	V-region	A	0.00017396	1.30851	116	3.2194	FP type II	NaBH4
P. halocryophilus	20	cluster35	gcgggtgtagtttagtggtaaaacctcagccttccaagctgatgatgagggttcgattcccttcacccgctccacca	GlyTCC-2	46	V-region	A	7.5567350925796e-09	1.65405	234	2.84939	FP type II	NaBH4
P. halocryophilus	20	cluster5	aggggcatagtttaacggtagaacagaggtctccaacacctccgatgtgggttcgattcctactgcccctgccacca	TrpCCA	46	V-region	A	6.14350379004564e-07	1.41015	230	3.89494	FP type II	NaBH4
P. halocryophilus	30	cluster5	aggggcatagtttaacggtagaacagaggtctccaacacctccgatgtgggttcgattcctactgcccctgccacca	TrpCCA	46	V-region	A	5.9035054027086e-08	1.31586	420	3.37547	FP type II	NaBH4
P. halocryophilus	20	cluster1	ggcggcatagccaagtggtaaggcatgggtctgcaacacccttatcaccggttcgagtccggttgccgcctccacca	CysGCA	48	V-region	C	4.06894780430722e-06	1.15258	296	7.39162	FP type II	NaBH4
P. halocryophilus	20	cluster15	gtctcagtagctcagctggatagagcaacgcccttctaaggcgtcggtcgggggttcgaatccctcctgggacaccacca	ArgTCT	48	V-region	C	0	3.14542	189	2.16428	FP type II	NaBH4
P. halocryophilus	20	cluster21	gcggaagtagttcagtggtagaacgccaccttgccaaggtggaggtcgcgagttcgaacctcgtcttccgctccacca	GlyGCC	48	V-region	C	0	3.26018	272.667	2.65317	FP type II	NaBH4
P. halocryophilus	20	cluster26	ggaggattagctcagctgggagagcatctgccttacaagcagagggtcggcggttcgatcccgtcatcctccaccacca	ValTAC	48	V-region	C	0	3.32924	258.667	2.31545	FP type II	NaBH4
P. halocryophilus	30	cluster26	ggaggattagctcagctgggagagcatctgccttacaagcagagggtcggcggttcgatcccgtcatcctccaccacca	ValTAC	48	V-region	C	0	2.87639	336.333	2.03629	FP type II	NaBH4
P. halocryophilus	20	cluster27	gggcctatagctcagctggttagagcgcacgcctgataagcgtgaggtcgatggttcgagtccatttaggcccaccacca	IleGAT	48	V-region	C	0	3.2825	1473.67	2.00837	FP type II	NaBH4
P. halocryophilus	20	cluster30	ggggccttagctcagctgggagagcgcctgccttgcacgcaggaggtcagcggttcgatcccgctaggctccaccacca	AlaTGC	48	V-region	C	0	3.3117	430.667	2.50638	FP type II	NaBH4
P. halocryophilus	30	cluster33	ggtctgttagctcagcgggagagcacttcgttgacatcgaaggggtcgctggttcgatcccagtacagaccaccacca	ValGAC	48	V-region	C	0.00248489	1.53693	53.3333	2.06897	FP type II	NaBH4
P. halocryophilus	10	cluster8	ggtggggtagcgaagtggctaaacgcggcggactgtaaatccgctccttcgggttcggcagttcgaatctgccccccaccaccacca	TyrGTA	48	V-region	C	5.47731070846463e-05	1.17795	239.667	2.08149	FP type II	NaBH4
P. halocryophilus	20	cluster8	ggtggggtagcgaagtggctaaacgcggcggactgtaaatccgctccttcgggttcggcagttcgaatctgccccccaccaccacca	TyrGTA	48	V-region	C	1.91255698583375e-15	1.77097	436.667	2.73935	FP type II	NaBH4
P. halocryophilus	30	cluster8	ggtggggtagcgaagtggctaaacgcggcggactgtaaatccgctccttcgggttcggcagttcgaatctgccccccaccaccacca	TyrGTA	48	V-region	C	5.42895853374803e-07	1.14628	455	2.00646	FP type II	NaBH4
P. halocryophilus	20	cluster9	ggcggcgtagctcagctggctagagcgtacggttcatacccgtgaggtcgggggttcgatcccctctgccgccaccacca	MetCAT-2	48	V-region	C	2.85649640142266e-15	1.92439	344	2.07139	FP type II	NaBH4
P. halocryophilus	20	cluster29	gcggtcgtggcggaatggcagacgcgctaggttgagggcctagtgggagaaatcccgtggaagttcgactcttctcggccgcaccacca	LeuGAG	51	5' T-stem	A	0	1.25193	22	2.40471	FP type II	NaBH4
P. halocryophilus	10	cluster22	cgcggggtggagcagttcggtagctcgttgggctcataacccaaaggtcgcaggttcaaatcctgcccccgcaaccacca	MetCAT-3	56	T-loop	C	0	1.59902	1858	2.42555	FP type II	NaBH4
P. halocryophilus	20	cluster22	cgcggggtggagcagttcggtagctcgttgggctcataacccaaaggtcgcaggttcaaatcctgcccccgcaaccacca	MetCAT-3	56	T-loop	C	0	3.95879	1290.67	2.25758	FP type II	NaBH4
P. halocryophilus	20	cluster23	ggggaagtactcaagtggctgaagaggcgcccctgctaagggtgtaggtcgggcaaccggcgcgagggttcaaatccctccttctccgccacca	SerGCT	56	T-loop	C	1.1915630058564e-12	3.29215	118.333	6.19086	FP type II	NaBH4
P. halocryophilus	30	cluster23	ggggaagtactcaagtggctgaagaggcgcccctgctaagggtgtaggtcgggcaaccggcgcgagggttcaaatccctccttctccgccacca	SerGCT	56	T-loop	C	6.3031908165914e-06	1.79389	138.333	7.37765	FP type II	NaBH4
P. halocryophilus	20	cluster6	gcggtcgtggcgaagtggttaacgcaccggattgtgattccggcactcgggggttcaattcccctcgtccgccccacca	HisGTG	56	T-loop	C	0	4.51522	1071	4.27695	FP type II	NaBH4
P. halocryophilus	30	cluster6	gcggtcgtggcgaagtggttaacgcaccggattgtgattccggcactcgggggttcaattcccctcgtccgccccacca	HisGTG	56	T-loop	C	0	2.0139	1288	3.7894	FP type II	NaBH4
P. halocryophilus	20	cluster8	ggtggggtagcgaagtggctaaacgcggcggactgtaaatccgctccttcgggttcggcagttcgaatctgccccccaccaccacca	TyrGTA	11e	V-region	C	4.76936122993797e-11	1.6302	306.333	2.20552	FP type II	NaBH4
P. halocryophilus	20	cluster23	ggggaagtactcaagtggctgaagaggcgcccctgctaagggtgtaggtcgggcaaccggcgcgagggttcaaatccctccttctccgccacca	SerGCT	24e	V-region	C	0.00768183	1.18459	33	2.20824	FP type II	NaBH4
P. halocryophilus	20	cluster10	gggtcagtagctcagtcggtagagcattagattgaagctctaagtgtcggcggttcgattccgtcctgacccaccacca	PheGAA	7	5' ACC-stem	G	0.000479122	1.07318	187.333	2.1892	FP type I	NaBH4
P. halocryophilus	10	cluster6	gcggtcgtggcgaagtggttaacgcaccggattgtgattccggcactcgggggttcaattcccctcgtccgccccacca	HisGTG	7	5' ACC-stem	G	0	2.81008	709.667	90.1465	FP type I	NaBH4
P. halocryophilus	20	cluster6	gcggtcgtggcgaagtggttaacgcaccggattgtgattccggcactcgggggttcaattcccctcgtccgccccacca	HisGTG	7	5' ACC-stem	G	0	4.23578	1352.67	92.5498	FP type I	NaBH4
P. halocryophilus	30	cluster6	gcggtcgtggcgaagtggttaacgcaccggattgtgattccggcactcgggggttcaattcccctcgtccgccccacca	HisGTG	7	5' ACC-stem	G	0	3.36267	1628.33	92.2934	FP type I	NaBH4
P. halocryophilus	10	cluster15	gtctcagtagctcagctggatagagcaacgcccttctaaggcgtcggtcgggggttcgaatccctcctgggacaccacca	ArgTCT	10	5' D-stem	G	0.000143767	1.32106	192.333	10.2006	FP type I	NaBH4
P. halocryophilus	20	cluster15	gtctcagtagctcagctggatagagcaacgcccttctaaggcgtcggtcgggggttcgaatccctcctgggacaccacca	ArgTCT	10	5' D-stem	G	0.00017396	1.48452	114.333	8.91237	FP type I	NaBH4
P. halocryophilus	10	cluster16	gagccattagctcagctggtagagcatctgacttttaatcagagggtcgaaggttcgaatccttcatggctcaccacca	LysTTT	10	5' D-stem	G	0	1.71605	1443	15.9848	FP type I	NaBH4
P. halocryophilus	20	cluster16	gagccattagctcagctggtagagcatctgacttttaatcagagggtcgaaggttcgaatccttcatggctcaccacca	LysTTT	10	5' D-stem	G	0	1.74077	905	16.3206	FP type I	NaBH4
P. halocryophilus	30	cluster16	gagccattagctcagctggtagagcatctgacttttaatcagagggtcgaaggttcgaatccttcatggctcaccacca	LysTTT	10	5' D-stem	G	8.10882959292003e-13	1.35667	686	14.3136	FP type I	NaBH4
P. halocryophilus	10	cluster17	gccggagtagctcagttggtagagcaactgacttgtaatcagtaggtcgagggttcgactcctttctccggcaccacca	ThrTGT-1	10	5' D-stem	G	0	4.61191	3846.33	28.2534	FP type I	NaBH4
P. halocryophilus	20	cluster17	gccggagtagctcagttggtagagcaactgacttgtaatcagtaggtcgagggttcgactcctttctccggcaccacca	ThrTGT-1	10	5' D-stem	G	0	4.62723	1974.33	20.9559	FP type I	NaBH4
P. halocryophilus	30	cluster17	gccggagtagctcagttggtagagcaactgacttgtaatcagtaggtcgagggttcgactcctttctccggcaccacca	ThrTGT-1	10	5' D-stem	G	0	4.48889	1815.33	15.5203	FP type I	NaBH4
P. halocryophilus	10	cluster26	ggaggattagctcagctgggagagcatctgccttacaagcagagggtcggcggttcgatcccgtcatcctccaccacca	ValTAC	10	5' D-stem	G	0	1.97786	470.333	7.50869	FP type I	NaBH4
P. halocryophilus	20	cluster26	ggaggattagctcagctgggagagcatctgccttacaagcagagggtcggcggttcgatcccgtcatcctccaccacca	ValTAC	10	5' D-stem	G	0.00777936	1.0091	130.333	5.28622	FP type I	NaBH4
P. halocryophilus	30	cluster26	ggaggattagctcagctgggagagcatctgccttacaagcagagggtcggcggttcgatcccgtcatcctccaccacca	ValTAC	10	5' D-stem	G	4.15398712355957e-08	1.57122	311	6.01254	FP type I	NaBH4
P. halocryophilus	10	cluster28	gccggagtagctcaactggtagagcaactgacttgtaatcagtaggttgagggttcaagtcctttctccggcaccacca	ThrTGT-2	10	5' D-stem	G	9.38821338130375e-11	1.8052	308.667	7.3616	FP type I	NaBH4
P. halocryophilus	20	cluster28	gccggagtagctcaactggtagagcaactgacttgtaatcagtaggttgagggttcaagtcctttctccggcaccacca	ThrTGT-2	10	5' D-stem	G	4.82278552868571e-06	1.33905	216.667	4.74202	FP type I	NaBH4
P. halocryophilus	30	cluster28	gccggagtagctcaactggtagagcaactgacttgtaatcagtaggttgagggttcaagtcctttctccggcaccacca	ThrTGT-2	10	5' D-stem	G	0.00779213	1.27324	121.333	3.83853	FP type I	NaBH4
P. halocryophilus	10	cluster30	ggggccttagctcagctgggagagcgcctgccttgcacgcaggaggtcagcggttcgatcccgctaggctccaccacca	AlaTGC	10	5' D-stem	G	0	3.89673	1459	11.6283	FP type I	NaBH4
P. halocryophilus	20	cluster30	ggggccttagctcagctgggagagcgcctgccttgcacgcaggaggtcagcggttcgatcccgctaggctccaccacca	AlaTGC	10	5' D-stem	G	0	2.98	450	7.30755	FP type I	NaBH4
P. halocryophilus	30	cluster30	ggggccttagctcagctgggagagcgcctgccttgcacgcaggaggtcagcggttcgatcccgctaggctccaccacca	AlaTGC	10	5' D-stem	G	0	4.03249	1079.33	7.56759	FP type I	NaBH4
P. halocryophilus	10	cluster20	gccggggtggcggaactggcagacgcacaggacttaaaatcctgcggtaggtgactaccgtaccggttcgattccggtcctcggcaccacca	LeuTAA	12	5' D-stem	G	0.00294263	1.52589	42.6667	7.01902	FP type I	NaBH4
P. halocryophilus	20	cluster20	gccggggtggcggaactggcagacgcacaggacttaaaatcctgcggtaggtgactaccgtaccggttcgattccggtcctcggcaccacca	LeuTAA	12	5' D-stem	G	0	1.60119	30	5.8607	FP type I	NaBH4
P. halocryophilus	30	cluster20	gccggggtggcggaactggcagacgcacaggacttaaaatcctgcggtaggtgactaccgtaccggttcgattccggtcctcggcaccacca	LeuTAA	12	5' D-stem	G	0.00248489	1.65511	54.6667	2.44837	FP type I	NaBH4
P. halocryophilus	20	cluster31	gcgggtgtagtttagtggtaaaacctcagccttccaagctgatgatgggggttcgattccccccacccgctccacca	GlyTCC-1	13	5' D-stem	T	0.00439955	1.24592	95.6667	5.56019	FP type I	NaBH4
P. halocryophilus	10	cluster17	gccggagtagctcagttggtagagcaactgacttgtaatcagtaggtcgagggttcgactcctttctccggcaccacca	ThrTGT-1	18	D-loop	G	0	2.13183	437.667	2.03555	FP type I	NaBH4
P. halocryophilus	10	cluster1	ggcggcatagccaagtggtaaggcatgggtctgcaacacccttatcaccggttcgagtccggttgccgcctccacca	CysGCA	19	D-loop	G	0	2.9187	768	18.3244	FP type I	NaBH4
P. halocryophilus	20	cluster1	ggcggcatagccaagtggtaaggcatgggtctgcaacacccttatcaccggttcgagtccggttgccgcctccacca	CysGCA	19	D-loop	G	0	2.616	330.333	18.6681	FP type I	NaBH4
P. halocryophilus	30	cluster1	ggcggcatagccaagtggtaaggcatgggtctgcaacacccttatcaccggttcgagtccggttgccgcctccacca	CysGCA	19	D-loop	G	0	2.90608	727.333	19.9069	FP type I	NaBH4
P. halocryophilus	20	cluster4	ggacctttagctcagttggttagagcagacggctcataaccgtccggtcgcaggttcgagtcctgcaaggtccaccacca	MetCAT-1	19	D-loop	G	0.00768183	1.17741	38.3333	14.9589	FP type I	NaBH4
P. halocryophilus	20	cluster7	gccggcgtggcggaattggcagacgcgcgggactcaaaatcccgttccttcaccggagtgtcggttcgaccccgaccgccggtaccacca	LeuCAA	21	D-loop	G	3.316983949079e-06	1.71779	131.333	3.97382	FP type I	NaBH4
P. halocryophilus	30	cluster7	gccggcgtggcggaattggcagacgcgcgggactcaaaatcccgttccttcaccggagtgtcggttcgaccccgaccgccggtaccacca	LeuCAA	21	D-loop	G	0.00927351	1.02773	173.333	2.40718	FP type I	NaBH4
P. halocryophilus	20	cluster21	gcggaagtagttcagtggtagaacgccaccttgccaaggtggaggtcgcgagttcgaacctcgtcttccgctccacca	GlyGCC	22	3' D-stem	G	9.33475374605581e-08	2.09288	101.667	2.55334	FP type I	NaBH4
P. halocryophilus	20	cluster26	ggaggattagctcagctgggagagcatctgccttacaagcagagggtcggcggttcgatcccgtcatcctccaccacca	ValTAC	22	3' D-stem	G	6.28343213629909e-07	2.124	95.3333	2.45356	FP type I	NaBH4
P. halocryophilus	20	cluster5	aggggcatagtttaacggtagaacagaggtctccaacacctccgatgtgggttcgattcctactgcccctgccacca	TrpCCA	22	3' D-stem	G	0.00205746	1.15795	83.3333	2.53119	FP type I	NaBH4
P. halocryophilus	20	cluster11	gcgcccgtagctcaattggatagagtacttgactacgaatcaagcggttagaggttcgagtcctctcgggcgcaccacca	ArgACG	25	3' D-stem	T	1.31197513010391e-05	1.23356	211	2.32788	FP type I	NaBH4
P. halocryophilus	20	cluster22	cgcggggtggagcagttcggtagctcgttgggctcataacccaaaggtcgcaggttcaaatcctgcccccgcaaccacca	MetCAT-3	26	after 3' D-stem	G	0	3.25114	606	2.10504	FP type I	NaBH4
P. halocryophilus	20	cluster10	gggtcagtagctcagtcggtagagcattagattgaagctctaagtgtcggcggttcgattccgtcctgacccaccacca	PheGAA	27	5' AC-stem	T	2.05460930311516e-09	1.44621	351.333	2.3481	FP type I	NaBH4
P. halocryophilus	20	cluster26	ggaggattagctcagctgggagagcatctgccttacaagcagagggtcggcggttcgatcccgtcatcctccaccacca	ValTAC	27	5' AC-stem	T	2.3015245124112e-10	2.61418	96.6667	2.31118	FP type I	NaBH4
P. halocryophilus	20	cluster35	gcgggtgtagtttagtggtaaaacctcagccttccaagctgatgatgagggttcgattcccttcacccgctccacca	GlyTCC-2	27	5' AC-stem	T	1.98625483950707e-06	1.82526	111	2.26879	FP type I	NaBH4
P. halocryophilus	20	cluster10	gggtcagtagctcagtcggtagagcattagattgaagctctaagtgtcggcggttcgattccgtcctgacccaccacca	PheGAA	28	5' AC-stem	T	6.65521917325196e-14	1.60403	445.667	2.86972	FP type I	NaBH4
P. halocryophilus	20	cluster10	gggtcagtagctcagtcggtagagcattagattgaagctctaagtgtcggcggttcgattccgtcctgacccaccacca	PheGAA	30	5' AC-stem	G	3.23536536315282e-09	1.32245	366.333	2.34039	FP type I	NaBH4
P. halocryophilus	20	cluster35	gcgggtgtagtttagtggtaaaacctcagccttccaagctgatgatgagggttcgattcccttcacccgctccacca	GlyTCC-2	30	5' AC-stem	G	1.98625483950707e-06	1.8508	108.667	2.06799	FP type I	NaBH4
P. halocryophilus	20	cluster9	ggcggcgtagctcagctggctagagcgtacggttcatacccgtgaggtcgggggttcgatcccctctgccgccaccacca	MetCAT-2	30	5' AC-stem	G	0.001578	1.24091	106	2.27666	FP type I	NaBH4
P. halocryophilus	20	cluster10	gggtcagtagctcagtcggtagagcattagattgaagctctaagtgtcggcggttcgattccgtcctgacccaccacca	PheGAA	33	AC-loop	T	2.98616608345914e-09	1.10625	520.333	3.01628	FP type I	NaBH4
P. halocryophilus	20	cluster20	gccggggtggcggaactggcagacgcacaggacttaaaatcctgcggtaggtgactaccgtaccggttcgattccggtcctcggcaccacca	LeuTAA	33	AC-loop	T	3.42720570873089e-06	1.38645	182	2.23267	FP type I	NaBH4
P. halocryophilus	20	cluster25	gccctcgtagtgtaatggatcacacgtaagattccggttcttgaaatggaggttcgattccttccgagggcaccacca	ArgCCG	33	AC-loop	T	3.46078510792515e-07	2.27659	73.3333	3.20303	FP type I	NaBH4
P. halocryophilus	30	cluster25	gccctcgtagtgtaatggatcacacgtaagattccggttcttgaaatggaggttcgattccttccgagggcaccacca	ArgCCG	33	AC-loop	T	0	3.42504	281.333	7.11906	FP type I	NaBH4
P. halocryophilus	20	cluster26	ggaggattagctcagctgggagagcatctgccttacaagcagagggtcggcggttcgatcccgtcatcctccaccacca	ValTAC	33	AC-loop	T	1.29456273246171e-07	1.45211	281.667	5.46554	FP type I	NaBH4
P. halocryophilus	20	cluster30	ggggccttagctcagctgggagagcgcctgccttgcacgcaggaggtcagcggttcgatcccgctaggctccaccacca	AlaTGC	33	AC-loop	T	6.14350379004564e-07	1.43918	235.333	2.57918	FP type I	NaBH4
P. halocryophilus	20	cluster7	gccggcgtggcggaattggcagacgcgcgggactcaaaatcccgttccttcaccggagtgtcggttcgaccccgaccgccggtaccacca	LeuCAA	33	AC-loop	T	1.16307810710773e-06	1.56559	158.333	2.0008	FP type I	NaBH4
P. halocryophilus	20	cluster9	ggcggcgtagctcagctggctagagcgtacggttcatacccgtgaggtcgggggttcgatcccctctgccgccaccacca	MetCAT-2	33	AC-loop	T	6.41612906524507e-05	1.18968	174.333	3.43537	FP type I	NaBH4
P. halocryophilus	20	cluster10	gggtcagtagctcagtcggtagagcattagattgaagctctaagtgtcggcggttcgattccgtcctgacccaccacca	PheGAA	34	AC-loop	G	2.04575806109166e-09	1.00466	653.667	3.62522	FP type I	NaBH4
P. halocryophilus	20	cluster20	gccggggtggcggaactggcagacgcacaggacttaaaatcctgcggtaggtgactaccgtaccggttcgattccggtcctcggcaccacca	LeuTAA	34	AC-loop	T	0	1.18476	3889	32.375	FP type I	NaBH4
P. halocryophilus	20	cluster17	gccggagtagctcagttggtagagcaactgacttgtaatcagtaggtcgagggttcgactcctttctccggcaccacca	ThrTGT-1	35	AC-loop	G	0	1.55695	1142.67	6.10912	FP type I	NaBH4
P. halocryophilus	20	cluster24	tccgaagtagctcagtggtagagcaccgcactgttaatgcgatggtcgtaggttcgagtcctaccttcggagccacca	AsnGTT	35	AC-loop	T	1.43752253967699e-15	1.06377	1071	4.27039	FP type I	NaBH4
P. halocryophilus	20	cluster8	ggtggggtagcgaagtggctaaacgcggcggactgtaaatccgctccttcgggttcggcagttcgaatctgccccccaccaccacca	TyrGTA	35	AC-loop	T	1.44585685304741e-11	1.27943	539.667	4.66398	FP type I	NaBH4
P. halocryophilus	20	cluster22	cgcggggtggagcagttcggtagctcgttgggctcataacccaaaggtcgcaggttcaaatcctgcccccgcaaccacca	MetCAT-3	36	AC-loop	T	0	1.79772	1557	4.47082	FP type I	NaBH4
P. halocryophilus	10	cluster4	ggacctttagctcagttggttagagcagacggctcataaccgtccggtcgcaggttcgagtcctgcaaggtccaccacca	MetCAT-1	36	AC-loop	T	6.51205810407703e-08	1.24113	410	2.35135	FP type I	NaBH4
P. halocryophilus	20	cluster4	ggacctttagctcagttggttagagcagacggctcataaccgtccggtcgcaggttcgagtcctgcaaggtccaccacca	MetCAT-1	36	AC-loop	T	0	2.31676	713.667	3.3588	FP type I	NaBH4
P. halocryophilus	30	cluster4	ggacctttagctcagttggttagagcagacggctcataaccgtccggtcgcaggttcgagtcctgcaaggtccaccacca	MetCAT-1	36	AC-loop	T	7.82836136340424e-11	1.63208	407.333	3.08596	FP type I	NaBH4
P. halocryophilus	20	cluster34	tggggtatagccaagcggtaaggcaacgggttttgatcccgtcatgccctggttcgaatccaggtaccccagccacca	GlnTTG	38	AC-loop	T	3.13209582390981e-06	1.0903	330.333	3.25786	FP type I	NaBH4
P. halocryophilus	20	cluster21	gcggaagtagttcagtggtagaacgccaccttgccaaggtggaggtcgcgagttcgaacctcgtcttccgctccacca	GlyGCC	40	3' AC-stem	G	7.47531931174001e-07	1.81184	133.667	2.56978	FP type I	NaBH4
P. halocryophilus	20	cluster10	gggtcagtagctcagtcggtagagcattagattgaagctctaagtgtcggcggttcgattccgtcctgacccaccacca	PheGAA	41	3' AC-stem	T	0	2.16971	693	2.75828	FP type I	NaBH4
P. halocryophilus	20	cluster29	gcggtcgtggcggaatggcagacgcgctaggttgagggcctagtgggagaaatcccgtggaagttcgactcttctcggccgcaccacca	LeuGAG	41	3' AC-stem	T	0	1.20973	22.3333	3.1778	FP type I	NaBH4
P. halocryophilus	10	cluster21	gcggaagtagttcagtggtagaacgccaccttgccaaggtggaggtcgcgagttcgaacctcgtcttccgctccacca	GlyGCC	42	3' AC-stem	G	0	3.31046	377	2.9856	FP type I	NaBH4
P. halocryophilus	20	cluster21	gcggaagtagttcagtggtagaacgccaccttgccaaggtggaggtcgcgagttcgaacctcgtcttccgctccacca	GlyGCC	42	3' AC-stem	G	2.55746930783611e-12	2.55819	141	2.52493	FP type I	NaBH4
P. halocryophilus	30	cluster21	gcggaagtagttcagtggtagaacgccaccttgccaaggtggaggtcgcgagttcgaacctcgtcttccgctccacca	GlyGCC	42	3' AC-stem	G	0	3.11523	801.333	3.28265	FP type I	NaBH4
P. halocryophilus	20	cluster35	gcgggtgtagtttagtggtaaaacctcagccttccaagctgatgatgagggttcgattcccttcacccgctccacca	GlyTCC-2	42	3' AC-stem	G	2.44180297890965e-08	1.78553	197.667	2.64701	FP type I	NaBH4
P. halocryophilus	10	cluster21	gcggaagtagttcagtggtagaacgccaccttgccaaggtggaggtcgcgagttcgaacctcgtcttccgctccacca	GlyGCC	43	3' AC-stem	G	5.22778038352857e-14	1.98836	344	2.70912	FP type I	NaBH4
P. halocryophilus	20	cluster21	gcggaagtagttcagtggtagaacgccaccttgccaaggtggaggtcgcgagttcgaacctcgtcttccgctccacca	GlyGCC	43	3' AC-stem	G	8.00756127748701e-08	1.71693	181.667	3.14481	FP type I	NaBH4
P. halocryophilus	30	cluster21	gcggaagtagttcagtggtagaacgccaccttgccaaggtggaggtcgcgagttcgaacctcgtcttccgctccacca	GlyGCC	43	3' AC-stem	G	0	1.79324	819.667	3.26147	FP type I	NaBH4
P. halocryophilus	20	cluster10	gggtcagtagctcagtcggtagagcattagattgaagctctaagtgtcggcggttcgattccgtcctgacccaccacca	PheGAA	44	V-region	G	2.46328913550961e-13	1.18709	736.333	2.72677	FP type I	NaBH4
P. halocryophilus	20	cluster35	gcgggtgtagtttagtggtaaaacctcagccttccaagctgatgatgagggttcgattcccttcacccgctccacca	GlyTCC-2	44	V-region	T	1.2711880970381e-05	1.52634	163	2.06468	FP type I	NaBH4
P. halocryophilus	20	cluster7	gccggcgtggcggaattggcagacgcgcgggactcaaaatcccgttccttcaccggagtgtcggttcgaccccgaccgccggtaccacca	LeuCAA	44	V-region	T	2.35393380914272e-05	1.30707	183.667	2.04007	FP type I	NaBH4
P. halocryophilus	10	cluster10	gggtcagtagctcagtcggtagagcattagattgaagctctaagtgtcggcggttcgattccgtcctgacccaccacca	PheGAA	45	V-region	T	0	2.15592	752.667	2.84004	FP type I	NaBH4
P. halocryophilus	20	cluster10	gggtcagtagctcagtcggtagagcattagattgaagctctaagtgtcggcggttcgattccgtcctgacccaccacca	PheGAA	45	V-region	T	0	2.79089	1124.67	3.98177	FP type I	NaBH4
P. halocryophilus	30	cluster10	gggtcagtagctcagtcggtagagcattagattgaagctctaagtgtcggcggttcgattccgtcctgacccaccacca	PheGAA	45	V-region	T	0	2.46975	1330	3.29928	FP type I	NaBH4
P. halocryophilus	10	cluster11	gcgcccgtagctcaattggatagagtacttgactacgaatcaagcggttagaggttcgagtcctctcgggcgcaccacca	ArgACG	45	V-region	G	0	2.90912	770.667	5.91193	FP type I	NaBH4
P. halocryophilus	20	cluster11	gcgcccgtagctcaattggatagagtacttgactacgaatcaagcggttagaggttcgagtcctctcgggcgcaccacca	ArgACG	45	V-region	G	0	2.97028	853.667	6.02488	FP type I	NaBH4
P. halocryophilus	30	cluster11	gcgcccgtagctcaattggatagagtacttgactacgaatcaagcggttagaggttcgagtcctctcgggcgcaccacca	ArgACG	45	V-region	G	0	2.66564	833.333	6.32574	FP type I	NaBH4
P. halocryophilus	20	cluster13	ggggccttagctcagctgggagagcgcgtcgctggcagtgacgaggtcaggggttcgagccccctaggctccaccacca	AlaGGC	45	V-region	G	0.00242645	1.36021	72.3333	18.7428	FP type I	NaBH4
P. halocryophilus	10	cluster15	gtctcagtagctcagctggatagagcaacgcccttctaaggcgtcggtcgggggttcgaatccctcctgggacaccacca	ArgTCT	45	V-region	G	2.43997710924759e-10	2.11089	215	3.16584	FP type I	NaBH4
P. halocryophilus	20	cluster15	gtctcagtagctcagctggatagagcaacgcccttctaaggcgtcggtcgggggttcgaatccctcctgggacaccacca	ArgTCT	45	V-region	G	6.12364909812812e-12	2.32913	184	3.49302	FP type I	NaBH4
P. halocryophilus	30	cluster15	gtctcagtagctcagctggatagagcaacgcccttctaaggcgtcggtcgggggttcgaatccctcctgggacaccacca	ArgTCT	45	V-region	G	4.28928417259802e-10	2.09115	250	3.43809	FP type I	NaBH4
P. halocryophilus	10	cluster16	gagccattagctcagctggtagagcatctgacttttaatcagagggtcgaaggttcgaatccttcatggctcaccacca	LysTTT	45	V-region	G	0	3.58441	1647.67	3.09117	FP type I	NaBH4
P. halocryophilus	20	cluster16	gagccattagctcagctggtagagcatctgacttttaatcagagggtcgaaggttcgaatccttcatggctcaccacca	LysTTT	45	V-region	G	0	3.9147	1493.67	3.46454	FP type I	NaBH4
P. halocryophilus	30	cluster16	gagccattagctcagctggtagagcatctgacttttaatcagagggtcgaaggttcgaatccttcatggctcaccacca	LysTTT	45	V-region	G	0	3.4409	1065.33	3.35377	FP type I	NaBH4
P. halocryophilus	10	cluster17	gccggagtagctcagttggtagagcaactgacttgtaatcagtaggtcgagggttcgactcctttctccggcaccacca	ThrTGT-1	45	V-region	G	0	3.86194	1220.33	3.81311	FP type I	NaBH4
P. halocryophilus	20	cluster17	gccggagtagctcagttggtagagcaactgacttgtaatcagtaggtcgagggttcgactcctttctccggcaccacca	ThrTGT-1	45	V-region	G	0	4.2881	934	4.01854	FP type I	NaBH4
P. halocryophilus	30	cluster17	gccggagtagctcagttggtagagcaactgacttgtaatcagtaggtcgagggttcgactcctttctccggcaccacca	ThrTGT-1	45	V-region	G	0	4.1565	1167.33	4.04793	FP type I	NaBH4
P. halocryophilus	10	cluster2	gcttccatagctcagcaggtagagtgcttccatggtaaggaagaggtcaccggttcgaatccggttggaagctccacca	ThrGGT	45	V-region	G	0	2.39238	57.3333	3.50139	FP type I	NaBH4
P. halocryophilus	20	cluster2	gcttccatagctcagcaggtagagtgcttccatggtaaggaagaggtcaccggttcgaatccggttggaagctccacca	ThrGGT	45	V-region	G	0	2.45825	49.6667	4.17771	FP type I	NaBH4
P. halocryophilus	10	cluster21	gcggaagtagttcagtggtagaacgccaccttgccaaggtggaggtcgcgagttcgaacctcgtcttccgctccacca	GlyGCC	45	V-region	G	0	4.22726	917.333	6.8772	FP type I	NaBH4
P. halocryophilus	20	cluster21	gcggaagtagttcagtggtagaacgccaccttgccaaggtggaggtcgcgagttcgaacctcgtcttccgctccacca	GlyGCC	45	V-region	G	0	5.19305	871.667	12.9867	FP type I	NaBH4
P. halocryophilus	30	cluster21	gcggaagtagttcagtggtagaacgccaccttgccaaggtggaggtcgcgagttcgaacctcgtcttccgctccacca	GlyGCC	45	V-region	G	0	4.5605	2073.33	7.64131	FP type I	NaBH4
P. halocryophilus	10	cluster22	cgcggggtggagcagttcggtagctcgttgggctcataacccaaaggtcgcaggttcaaatcctgcccccgcaaccacca	MetCAT-3	45	V-region	G	0	4.52848	1068.33	2.0088	FP type I	NaBH4
P. halocryophilus	10	cluster24	tccgaagtagctcagtggtagagcaccgcactgttaatgcgatggtcgtaggttcgagtcctaccttcggagccacca	AsnGTT	45	V-region	G	0	4.44189	702	2.92173	FP type I	NaBH4
P. halocryophilus	20	cluster24	tccgaagtagctcagtggtagagcaccgcactgttaatgcgatggtcgtaggttcgagtcctaccttcggagccacca	AsnGTT	45	V-region	G	0	4.84283	1021	3.28296	FP type I	NaBH4
P. halocryophilus	30	cluster24	tccgaagtagctcagtggtagagcaccgcactgttaatgcgatggtcgtaggttcgagtcctaccttcggagccacca	AsnGTT	45	V-region	G	0	4.32171	1210.33	3.2741	FP type I	NaBH4
P. halocryophilus	10	cluster26	ggaggattagctcagctgggagagcatctgccttacaagcagagggtcggcggttcgatcccgtcatcctccaccacca	ValTAC	45	V-region	G	0	4.28384	560	4.64858	FP type I	NaBH4
P. halocryophilus	20	cluster26	ggaggattagctcagctgggagagcatctgccttacaagcagagggtcggcggttcgatcccgtcatcctccaccacca	ValTAC	45	V-region	G	0	4.34676	363	4.40024	FP type I	NaBH4
P. halocryophilus	30	cluster26	ggaggattagctcagctgggagagcatctgccttacaagcagagggtcggcggttcgatcccgtcatcctccaccacca	ValTAC	45	V-region	G	0	5.24152	657	5.6146	FP type I	NaBH4
P. halocryophilus	10	cluster27	gggcctatagctcagctggttagagcgcacgcctgataagcgtgaggtcgatggttcgagtccatttaggcccaccacca	IleGAT	45	V-region	G	0	4.75721	2018.67	3.32898	FP type I	NaBH4
P. halocryophilus	20	cluster27	gggcctatagctcagctggttagagcgcacgcctgataagcgtgaggtcgatggttcgagtccatttaggcccaccacca	IleGAT	45	V-region	G	0	5.06654	2190.33	3.5315	FP type I	NaBH4
P. halocryophilus	30	cluster27	gggcctatagctcagctggttagagcgcacgcctgataagcgtgaggtcgatggttcgagtccatttaggcccaccacca	IleGAT	45	V-region	G	0	5.10018	3175.67	3.44126	FP type I	NaBH4
P. halocryophilus	10	cluster28	gccggagtagctcaactggtagagcaactgacttgtaatcagtaggttgagggttcaagtcctttctccggcaccacca	ThrTGT-2	45	V-region	G	0	4.19827	881.667	6.41172	FP type I	NaBH4
P. halocryophilus	20	cluster28	gccggagtagctcaactggtagagcaactgacttgtaatcagtaggttgagggttcaagtcctttctccggcaccacca	ThrTGT-2	45	V-region	G	0	4.86	1354.67	9.25584	FP type I	NaBH4
P. halocryophilus	30	cluster28	gccggagtagctcaactggtagagcaactgacttgtaatcagtaggttgagggttcaagtcctttctccggcaccacca	ThrTGT-2	45	V-region	G	0	4.26721	752.667	6.64917	FP type I	NaBH4
P. halocryophilus	10	cluster30	ggggccttagctcagctgggagagcgcctgccttgcacgcaggaggtcagcggttcgatcccgctaggctccaccacca	AlaTGC	45	V-region	G	0	5.16771	835.333	4.6184	FP type I	NaBH4
P. halocryophilus	20	cluster30	ggggccttagctcagctgggagagcgcctgccttgcacgcaggaggtcagcggttcgatcccgctaggctccaccacca	AlaTGC	45	V-region	G	0	5.4935	646.667	5.287	FP type I	NaBH4
P. halocryophilus	30	cluster30	ggggccttagctcagctgggagagcgcctgccttgcacgcaggaggtcagcggttcgatcccgctaggctccaccacca	AlaTGC	45	V-region	G	0	4.68781	683.667	3.11322	FP type I	NaBH4
P. halocryophilus	10	cluster33	ggtctgttagctcagcgggagagcacttcgttgacatcgaaggggtcgctggttcgatcccagtacagaccaccacca	ValGAC	45	V-region	G	0	2.36848	52	7.36084	FP type I	NaBH4
P. halocryophilus	20	cluster33	ggtctgttagctcagcgggagagcacttcgttgacatcgaaggggtcgctggttcgatcccagtacagaccaccacca	ValGAC	45	V-region	G	3.30614623679582e-08	2.57341	83	9.99986	FP type I	NaBH4
P. halocryophilus	30	cluster33	ggtctgttagctcagcgggagagcacttcgttgacatcgaaggggtcgctggttcgatcccagtacagaccaccacca	ValGAC	45	V-region	G	3.16388026888603e-11	2.54408	125.667	6.8232	FP type I	NaBH4
P. halocryophilus	20	cluster35	gcgggtgtagtttagtggtaaaacctcagccttccaagctgatgatgagggttcgattcccttcacccgctccacca	GlyTCC-2	45	V-region	G	1.15927986423911e-06	1.48053	171.333	2.13515	FP type I	NaBH4
P. halocryophilus	20	cluster5	aggggcatagtttaacggtagaacagaggtctccaacacctccgatgtgggttcgattcctactgcccctgccacca	TrpCCA	45	V-region	G	0.00060043	1.19342	147.333	2.59984	FP type I	NaBH4
P. halocryophilus	10	cluster9	ggcggcgtagctcagctggctagagcgtacggttcatacccgtgaggtcgggggttcgatcccctctgccgccaccacca	MetCAT-2	45	V-region	G	0	2.71783	621.333	2.90104	FP type I	NaBH4
P. halocryophilus	20	cluster9	ggcggcgtagctcagctggctagagcgtacggttcatacccgtgaggtcgggggttcgatcccctctgccgccaccacca	MetCAT-2	45	V-region	G	0	2.98762	442	3.63668	FP type I	NaBH4
P. halocryophilus	30	cluster9	ggcggcgtagctcagctggctagagcgtacggttcatacccgtgaggtcgggggttcgatcccctctgccgccaccacca	MetCAT-2	45	V-region	G	0	3.18434	538.667	3.29862	FP type I	NaBH4
P. halocryophilus	20	cluster11	gcgcccgtagctcaattggatagagtacttgactacgaatcaagcggttagaggttcgagtcctctcgggcgcaccacca	ArgACG	48	V-region	T	0	1.56164	585	2.34373	FP type I	NaBH4
P. halocryophilus	20	cluster29	gcggtcgtggcggaatggcagacgcgctaggttgagggcctagtgggagaaatcccgtggaagttcgactcttctcggccgcaccacca	LeuGAG	48	V-region	T	0	1.2392	26	2.89746	FP type I	NaBH4
P. halocryophilus	20	cluster35	gcgggtgtagtttagtggtaaaacctcagccttccaagctgatgatgagggttcgattcccttcacccgctccacca	GlyTCC-2	48	V-region	T	2.3015245124112e-10	2.04131	200	2.36403	FP type I	NaBH4
P. halocryophilus	20	cluster5	aggggcatagtttaacggtagaacagaggtctccaacacctccgatgtgggttcgattcctactgcccctgccacca	TrpCCA	48	V-region	T	1.50002479307854e-05	1.67527	131.667	2.17375	FP type I	NaBH4
P. halocryophilus	30	cluster5	aggggcatagtttaacggtagaacagaggtctccaacacctccgatgtgggttcgattcctactgcccctgccacca	TrpCCA	48	V-region	T	5.62972086954389e-07	1.55581	260	2.06268	FP type I	NaBH4
P. halocryophilus	20	cluster5	aggggcatagtttaacggtagaacagaggtctccaacacctccgatgtgggttcgattcctactgcccctgccacca	TrpCCA	50	5' T-stem	T	1.05514761309106e-09	1.95592	198	3.09493	FP type I	NaBH4
P. halocryophilus	30	cluster5	aggggcatagtttaacggtagaacagaggtctccaacacctccgatgtgggttcgattcctactgcccctgccacca	TrpCCA	50	5' T-stem	T	1.05334341249375e-09	1.60697	359.333	2.73769	FP type I	NaBH4
P. halocryophilus	20	cluster21	gcggaagtagttcagtggtagaacgccaccttgccaaggtggaggtcgcgagttcgaacctcgtcttccgctccacca	GlyGCC	51	5' T-stem	G	0	3.48153	242.333	2.24228	FP type I	NaBH4
P. halocryophilus	20	cluster12	ggaggaatacccaagtttggctgaagggatcggtcttgaaaaccgacaggggagtcaaatcccgcgggggttcgaatccctcttcctcctccacca	SerTGA	53	5' T-stem	G	0.00788271	1.31207	63	2.30842	FP type I	NaBH4
P. halocryophilus	20	cluster7	gccggcgtggcggaattggcagacgcgcgggactcaaaatcccgttccttcaccggagtgtcggttcgaccccgaccgccggtaccacca	LeuCAA	13e	V-region	T	8.49932766011809e-05	1.13166	197.333	2.10282	FP type I	NaBH4
P. halocryophilus	10	cluster18	cgggaagtagctcagcttggtagagcacttggtttgggaccaaggggtcgcaggttcgaatcctgtcttcccgaccacca	ProTGG	17a	D-loop	T	0.00513801	1.38309	62.6667	2.79801	FP type I	NaBH4
P. halocryophilus	10	cluster23	ggggaagtactcaagtggctgaagaggcgcccctgctaagggtgtaggtcgggcaaccggcgcgagggttcaaatccctccttctccgccacca	SerGCT	20b	D-loop	G	6.54553213755128e-10	2.21292	151.333	14.213	FP type I	NaBH4
P. halocryophilus	20	cluster23	ggggaagtactcaagtggctgaagaggcgcccctgctaagggtgtaggtcgggcaaccggcgcgagggttcaaatccctccttctccgccacca	SerGCT	20b	D-loop	G	3.93783303635168e-06	2.03437	94.3333	17.2222	FP type I	NaBH4
P. halocryophilus	30	cluster23	ggggaagtactcaagtggctgaagaggcgcccctgctaagggtgtaggtcgggcaaccggcgcgagggttcaaatccctccttctccgccacca	SerGCT	20b	D-loop	G	6.3031908165914e-06	2.10502	75.6667	11.3463	FP type I	NaBH4
P. halocryophilus	20	cluster8	ggtggggtagcgaagtggctaaacgcggcggactgtaaatccgctccttcgggttcggcagttcgaatctgccccccaccaccacca	TyrGTA	21e	V-region	G	2.25015078438556e-13	1.8504	319	2.15025	FP type I	NaBH4
P. halocryophilus	20	cluster29	gcggtcgtggcggaatggcagacgcgctaggttgagggcctagtgggagaaatcccgtggaagttcgactcttctcggccgcaccacca	LeuGAG	2e	V-region	G	0	1.25251	23.3333	2.96025	FP type I	NaBH4
P. halocryophilus	10	cluster1	ggcggcatagccaagtggtaaggcatgggtctgcaacacccttatcaccggttcgagtccggttgccgcctccacca	CysGCA	16	D-loop	T	1.9585902555233e-07	1.6217	257.667	7.36451	D	NaBH4
P. halocryophilus	20	cluster1	ggcggcatagccaagtggtaaggcatgggtctgcaacacccttatcaccggttcgagtccggttgccgcctccacca	CysGCA	16	D-loop	T	0.001578	1.12935	104.333	7.23746	D	NaBH4
P. halocryophilus	30	cluster1	ggcggcatagccaagtggtaaggcatgggtctgcaacacccttatcaccggttcgagtccggttgccgcctccacca	CysGCA	16	D-loop	T	5.85144863308868e-05	1.35477	204.333	7.12591	D	NaBH4
P. halocryophilus	10	cluster16	gagccattagctcagctggtagagcatctgacttttaatcagagggtcgaaggttcgaatccttcatggctcaccacca	LysTTT	16	D-loop	C	0	1.54904	3619.67	23.1423	D	NaBH4
P. halocryophilus	20	cluster16	gagccattagctcagctggtagagcatctgacttttaatcagagggtcgaaggttcgaatccttcatggctcaccacca	LysTTT	16	D-loop	C	0	1.6508	2934.67	26.924	D	NaBH4
P. halocryophilus	30	cluster16	gagccattagctcagctggtagagcatctgacttttaatcagagggtcgaaggttcgaatccttcatggctcaccacca	LysTTT	16	D-loop	C	0	1.32315	2134.67	25.1181	D	NaBH4
P. halocryophilus	10	cluster17	gccggagtagctcagttggtagagcaactgacttgtaatcagtaggtcgagggttcgactcctttctccggcaccacca	ThrTGT-1	16	D-loop	T	0	2.5824	1715.33	10.3356	D	NaBH4
P. halocryophilus	20	cluster17	gccggagtagctcagttggtagagcaactgacttgtaatcagtaggtcgagggttcgactcctttctccggcaccacca	ThrTGT-1	16	D-loop	T	0	3.01856	1313.33	11.3064	D	NaBH4
P. halocryophilus	30	cluster17	gccggagtagctcagttggtagagcaactgacttgtaatcagtaggtcgagggttcgactcctttctccggcaccacca	ThrTGT-1	16	D-loop	T	0	2.75378	1633	11.4265	D	NaBH4
P. halocryophilus	10	cluster20	gccggggtggcggaactggcagacgcacaggacttaaaatcctgcggtaggtgactaccgtaccggttcgattccggtcctcggcaccacca	LeuTAA	16	D-loop	C	2.68425022166046e-09	2.17209	171.333	16.6809	D	NaBH4
P. halocryophilus	20	cluster20	gccggggtggcggaactggcagacgcacaggacttaaaatcctgcggtaggtgactaccgtaccggttcgattccggtcctcggcaccacca	LeuTAA	16	D-loop	C	9.33475374605581e-08	2.21435	100.333	14.3211	D	NaBH4
P. halocryophilus	30	cluster20	gccggggtggcggaactggcagacgcacaggacttaaaatcctgcggtaggtgactaccgtaccggttcgattccggtcctcggcaccacca	LeuTAA	16	D-loop	C	7.29905342113041e-07	1.94035	143.333	5.57602	D	NaBH4
P. halocryophilus	20	cluster22	cgcggggtggagcagttcggtagctcgttgggctcataacccaaaggtcgcaggttcaaatcctgcccccgcaaccacca	MetCAT-3	16	D-loop	T	4.60682324496647e-13	1.32958	601	3.76118	D	NaBH4
P. halocryophilus	10	cluster7	gccggcgtggcggaattggcagacgcgcgggactcaaaatcccgttccttcaccggagtgtcggttcgaccccgaccgccggtaccacca	LeuCAA	16	D-loop	T	0.000510111	1.32094	165	18.1885	D	NaBH4
P. halocryophilus	20	cluster7	gccggcgtggcggaattggcagacgcgcgggactcaaaatcccgttccttcaccggagtgtcggttcgaccccgaccgccggtaccacca	LeuCAA	16	D-loop	T	4.66161959700173e-09	1.91063	191	20.6101	D	NaBH4
P. halocryophilus	30	cluster7	gccggcgtggcggaattggcagacgcgcgggactcaaaatcccgttccttcaccggagtgtcggttcgaccccgaccgccggtaccacca	LeuCAA	16	D-loop	T	6.43389095436716e-05	1.2476	250.333	9.61389	D	NaBH4
P. halocryophilus	10	cluster11	gcgcccgtagctcaattggatagagtacttgactacgaatcaagcggttagaggttcgagtcctctcgggcgcaccacca	ArgACG	17	D-loop	T	0	3.97716	5314.33	69.1359	D	NaBH4
P. halocryophilus	20	cluster11	gcgcccgtagctcaattggatagagtacttgactacgaatcaagcggttagaggttcgagtcctctcgggcgcaccacca	ArgACG	17	D-loop	T	0	3.66481	4252	62.4318	D	NaBH4
P. halocryophilus	30	cluster11	gcgcccgtagctcaattggatagagtacttgactacgaatcaagcggttagaggttcgagtcctctcgggcgcaccacca	ArgACG	17	D-loop	T	0	3.93736	5123.33	69.0211	D	NaBH4
P. halocryophilus	30	cluster13	ggggccttagctcagctgggagagcgcgtcgctggcagtgacgaggtcaggggttcgagccccctaggctccaccacca	AlaGGC	17	D-loop	T	0	1.04458	21	13.7304	D	NaBH4
P. halocryophilus	10	cluster15	gtctcagtagctcagctggatagagcaacgcccttctaaggcgtcggtcgggggttcgaatccctcctgggacaccacca	ArgTCT	17	D-loop	T	0	4.27554	2084.67	48.3315	D	NaBH4
P. halocryophilus	20	cluster15	gtctcagtagctcagctggatagagcaacgcccttctaaggcgtcggtcgggggttcgaatccctcctgggacaccacca	ArgTCT	17	D-loop	T	0	4.3104	1158	43.9098	D	NaBH4
P. halocryophilus	30	cluster15	gtctcagtagctcagctggatagagcaacgcccttctaaggcgtcggtcgggggttcgaatccctcctgggacaccacca	ArgTCT	17	D-loop	T	0	4.09348	2333	52.0921	D	NaBH4
P. halocryophilus	10	cluster16	gagccattagctcagctggtagagcatctgacttttaatcagagggtcgaaggttcgaatccttcatggctcaccacca	LysTTT	17	D-loop	T	0	5.35524	17936	52.0959	D	NaBH4
P. halocryophilus	20	cluster16	gagccattagctcagctggtagagcatctgacttttaatcagagggtcgaaggttcgaatccttcatggctcaccacca	LysTTT	17	D-loop	T	0	5.25147	10660.7	49.358	D	NaBH4
P. halocryophilus	30	cluster16	gagccattagctcagctggtagagcatctgacttttaatcagagggtcgaaggttcgaatccttcatggctcaccacca	LysTTT	17	D-loop	T	0	5.27023	10572	55.1591	D	NaBH4
P. halocryophilus	10	cluster17	gccggagtagctcagttggtagagcaactgacttgtaatcagtaggtcgagggttcgactcctttctccggcaccacca	ThrTGT-1	17	D-loop	T	0	4.97932	4382.33	20.407	D	NaBH4
P. halocryophilus	20	cluster17	gccggagtagctcagttggtagagcaactgacttgtaatcagtaggtcgagggttcgactcctttctccggcaccacca	ThrTGT-1	17	D-loop	T	0	5.05642	2516	17.8263	D	NaBH4
P. halocryophilus	30	cluster17	gccggagtagctcagttggtagagcaactgacttgtaatcagtaggtcgagggttcgactcctttctccggcaccacca	ThrTGT-1	17	D-loop	T	0	5.30815	4422	23.4403	D	NaBH4
P. halocryophilus	10	cluster19	gcgggtgtggcggaactggcagacgcactagacttaggatctagcgccttcgggcgtgggggttcgactcccttcacccgcaccacca	LeuTAG	17	D-loop	T	0	3.72258	283.667	73.3316	D	NaBH4
P. halocryophilus	20	cluster19	gcgggtgtggcggaactggcagacgcactagacttaggatctagcgccttcgggcgtgggggttcgactcccttcacccgcaccacca	LeuTAG	17	D-loop	T	4.74043835353868e-15	3.00395	126.667	63.5355	D	NaBH4
P. halocryophilus	30	cluster19	gcgggtgtggcggaactggcagacgcactagacttaggatctagcgccttcgggcgtgggggttcgactcccttcacccgcaccacca	LeuTAG	17	D-loop	T	0	3.63145	173.333	59.2054	D	NaBH4
P. halocryophilus	10	cluster20	gccggggtggcggaactggcagacgcacaggacttaaaatcctgcggtaggtgactaccgtaccggttcgattccggtcctcggcaccacca	LeuTAA	17	D-loop	T	0	6.28717	8739	85.0995	D	NaBH4
P. halocryophilus	20	cluster20	gccggggtggcggaactggcagacgcacaggacttaaaatcctgcggtaggtgactaccgtaccggttcgattccggtcctcggcaccacca	LeuTAA	17	D-loop	T	0	6.68257	4225	84.9078	D	NaBH4
P. halocryophilus	30	cluster20	gccggggtggcggaactggcagacgcacaggacttaaaatcctgcggtaggtgactaccgtaccggttcgattccggtcctcggcaccacca	LeuTAA	17	D-loop	T	0	6.68435	8386	69.4056	D	NaBH4
P. halocryophilus	10	cluster22	cgcggggtggagcagttcggtagctcgttgggctcataacccaaaggtcgcaggttcaaatcctgcccccgcaaccacca	MetCAT-3	17	D-loop	T	0	1.67127	1034	3.35297	D	NaBH4
P. halocryophilus	20	cluster22	cgcggggtggagcagttcggtagctcgttgggctcataacccaaaggtcgcaggttcaaatcctgcccccgcaaccacca	MetCAT-3	17	D-loop	T	0	2.00825	678	4.01818	D	NaBH4
P. halocryophilus	30	cluster22	cgcggggtggagcagttcggtagctcgttgggctcataacccaaaggtcgcaggttcaaatcctgcccccgcaaccacca	MetCAT-3	17	D-loop	T	0	1.7153	654.333	2.68377	D	NaBH4
P. halocryophilus	10	cluster26	ggaggattagctcagctgggagagcatctgccttacaagcagagggtcggcggttcgatcccgtcatcctccaccacca	ValTAC	17	D-loop	T	0	2.58329	917.667	10.6559	D	NaBH4
P. halocryophilus	20	cluster26	ggaggattagctcagctgggagagcatctgccttacaagcagagggtcggcggttcgatcccgtcatcctccaccacca	ValTAC	17	D-loop	T	9.16601074001188e-12	1.85862	280	8.09963	D	NaBH4
P. halocryophilus	30	cluster26	ggaggattagctcagctgggagagcatctgccttacaagcagagggtcggcggttcgatcccgtcatcctccaccacca	ValTAC	17	D-loop	T	0	2.33699	691.333	10.0517	D	NaBH4
P. halocryophilus	10	cluster27	gggcctatagctcagctggttagagcgcacgcctgataagcgtgaggtcgatggttcgagtccatttaggcccaccacca	IleGAT	17	D-loop	T	0	2.68662	5653	80.9141	D	NaBH4
P. halocryophilus	20	cluster27	gggcctatagctcagctggttagagcgcacgcctgataagcgtgaggtcgatggttcgagtccatttaggcccaccacca	IleGAT	17	D-loop	T	0	2.33581	4542	77.0499	D	NaBH4
P. halocryophilus	30	cluster27	gggcctatagctcagctggttagagcgcacgcctgataagcgtgaggtcgatggttcgagtccatttaggcccaccacca	IleGAT	17	D-loop	T	0	2.40014	7712.67	82.268	D	NaBH4
P. halocryophilus	10	cluster28	gccggagtagctcaactggtagagcaactgacttgtaatcagtaggttgagggttcaagtcctttctccggcaccacca	ThrTGT-2	17	D-loop	T	0	5.73773	4427.33	45.8584	D	NaBH4
P. halocryophilus	20	cluster28	gccggagtagctcaactggtagagcaactgacttgtaatcagtaggttgagggttcaagtcctttctccggcaccacca	ThrTGT-2	17	D-loop	T	0	5.75636	3470	38.5186	D	NaBH4
P. halocryophilus	30	cluster28	gccggagtagctcaactggtagagcaactgacttgtaatcagtaggttgagggttcaagtcctttctccggcaccacca	ThrTGT-2	17	D-loop	T	0	5.94533	3759.67	48.6801	D	NaBH4
P. halocryophilus	10	cluster30	ggggccttagctcagctgggagagcgcctgccttgcacgcaggaggtcagcggttcgatcccgctaggctccaccacca	AlaTGC	17	D-loop	T	0	2.86676	1067	6.71388	D	NaBH4
P. halocryophilus	20	cluster30	ggggccttagctcagctgggagagcgcctgccttgcacgcaggaggtcagcggttcgatcccgctaggctccaccacca	AlaTGC	17	D-loop	T	0	2.32331	421.333	5.50118	D	NaBH4
P. halocryophilus	30	cluster30	ggggccttagctcagctgggagagcgcctgccttgcacgcaggaggtcagcggttcgatcccgctaggctccaccacca	AlaTGC	17	D-loop	T	0	2.7625	1008	5.93943	D	NaBH4
P. halocryophilus	10	cluster4	ggacctttagctcagttggttagagcagacggctcataaccgtccggtcgcaggttcgagtcctgcaaggtccaccacca	MetCAT-1	17	D-loop	T	0	3.09382	197	76.3998	D	NaBH4
P. halocryophilus	20	cluster4	ggacctttagctcagttggttagagcagacggctcataaccgtccggtcgcaggttcgagtcctgcaaggtccaccacca	MetCAT-1	17	D-loop	T	2.62039822946834e-13	3.00632	151.667	72.2406	D	NaBH4
P. halocryophilus	30	cluster4	ggacctttagctcagttggttagagcagacggctcataaccgtccggtcgcaggttcgagtcctgcaaggtccaccacca	MetCAT-1	17	D-loop	T	0	3.23641	169	76.1614	D	NaBH4
P. halocryophilus	10	cluster7	gccggcgtggcggaattggcagacgcgcgggactcaaaatcccgttccttcaccggagtgtcggttcgaccccgaccgccggtaccacca	LeuCAA	17	D-loop	T	0	5.04369	2168.33	66.4986	D	NaBH4
P. halocryophilus	20	cluster7	gccggcgtggcggaattggcagacgcgcgggactcaaaatcccgttccttcaccggagtgtcggttcgaccccgaccgccggtaccacca	LeuCAA	17	D-loop	T	0	5.66098	1975	67.2854	D	NaBH4
P. halocryophilus	30	cluster7	gccggcgtggcggaattggcagacgcgcgggactcaaaatcccgttccttcaccggagtgtcggttcgaccccgaccgccggtaccacca	LeuCAA	17	D-loop	T	0	5.53375	3479.33	52.9575	D	NaBH4
P. halocryophilus	10	cluster9	ggcggcgtagctcagctggctagagcgtacggttcatacccgtgaggtcgggggttcgatcccctctgccgccaccacca	MetCAT-2	17	D-loop	T	0	4.40572	5542	60.4454	D	NaBH4
P. halocryophilus	20	cluster9	ggcggcgtagctcagctggctagagcgtacggttcatacccgtgaggtcgggggttcgatcccctctgccgccaccacca	MetCAT-2	17	D-loop	T	0	3.67604	1509	51.5251	D	NaBH4
P. halocryophilus	30	cluster9	ggcggcgtagctcagctggctagagcgtacggttcatacccgtgaggtcgggggttcgatcccctctgccgccaccacca	MetCAT-2	17	D-loop	T	0	4.31471	3835.33	62.0537	D	NaBH4
P. halocryophilus	10	cluster10	gggtcagtagctcagtcggtagagcattagattgaagctctaagtgtcggcggttcgattccgtcctgacccaccacca	PheGAA	20	D-loop	T	0	3.80082	2494.33	16.2131	D	NaBH4
P. halocryophilus	20	cluster10	gggtcagtagctcagtcggtagagcattagattgaagctctaagtgtcggcggttcgattccgtcctgacccaccacca	PheGAA	20	D-loop	T	0	4.08698	2534.67	19.0251	D	NaBH4
P. halocryophilus	30	cluster10	gggtcagtagctcagtcggtagagcattagattgaagctctaagtgtcggcggttcgattccgtcctgacccaccacca	PheGAA	20	D-loop	T	0	3.74604	3269.33	16.5498	D	NaBH4
P. halocryophilus	10	cluster14	ggccccttggtcaagcggttaagacaccgccctttcacggcggtaacacgggttcgaatcccgtaggggtcaccacca	GluTTC	20	D-loop	T	0	1.52511	9813.33	71.413	D	NaBH4
P. halocryophilus	20	cluster14	ggccccttggtcaagcggttaagacaccgccctttcacggcggtaacacgggttcgaatcccgtaggggtcaccacca	GluTTC	20	D-loop	T	0	1.91432	11496	74.0033	D	NaBH4
P. halocryophilus	30	cluster14	ggccccttggtcaagcggttaagacaccgccctttcacggcggtaacacgggttcgaatcccgtaggggtcaccacca	GluTTC	20	D-loop	T	0	1.31655	9018	70.279	D	NaBH4
P. halocryophilus	10	cluster16	gagccattagctcagctggtagagcatctgacttttaatcagagggtcgaaggttcgaatccttcatggctcaccacca	LysTTT	20	D-loop	T	0	3.15576	3062.33	7.95117	D	NaBH4
P. halocryophilus	20	cluster16	gagccattagctcagctggtagagcatctgacttttaatcagagggtcgaaggttcgaatccttcatggctcaccacca	LysTTT	20	D-loop	T	0	3.3301	2218.67	9.06403	D	NaBH4
P. halocryophilus	30	cluster16	gagccattagctcagctggtagagcatctgacttttaatcagagggtcgaaggttcgaatccttcatggctcaccacca	LysTTT	20	D-loop	T	0	2.98277	1591.67	7.53556	D	NaBH4
P. halocryophilus	10	cluster17	gccggagtagctcagttggtagagcaactgacttgtaatcagtaggtcgagggttcgactcctttctccggcaccacca	ThrTGT-1	20	D-loop	T	0	4.22621	1979	8.04506	D	NaBH4
P. halocryophilus	20	cluster17	gccggagtagctcagttggtagagcaactgacttgtaatcagtaggtcgagggttcgactcctttctccggcaccacca	ThrTGT-1	20	D-loop	T	0	4.70435	1130	7.22919	D	NaBH4
P. halocryophilus	30	cluster17	gccggagtagctcagttggtagagcaactgacttgtaatcagtaggtcgagggttcgactcctttctccggcaccacca	ThrTGT-1	20	D-loop	T	0	4.695	1738.67	8.19788	D	NaBH4
P. halocryophilus	10	cluster18	cgggaagtagctcagcttggtagagcacttggtttgggaccaaggggtcgcaggttcgaatcctgtcttcccgaccacca	ProTGG	20	D-loop	T	0	5.02746	1018.67	31.2949	D	NaBH4
P. halocryophilus	20	cluster18	cgggaagtagctcagcttggtagagcacttggtttgggaccaaggggtcgcaggttcgaatcctgtcttcccgaccacca	ProTGG	20	D-loop	T	0	4.89989	992	34.9962	D	NaBH4
P. halocryophilus	30	cluster18	cgggaagtagctcagcttggtagagcacttggtttgggaccaaggggtcgcaggttcgaatcctgtcttcccgaccacca	ProTGG	20	D-loop	T	0	4.97093	1089.33	30.4262	D	NaBH4
P. halocryophilus	10	cluster2	gcttccatagctcagcaggtagagtgcttccatggtaaggaagaggtcaccggttcgaatccggttggaagctccacca	ThrGGT	20	D-loop	T	0	3.02003	142	10.9927	D	NaBH4
P. halocryophilus	20	cluster2	gcttccatagctcagcaggtagagtgcttccatggtaaggaagaggtcaccggttcgaatccggttggaagctccacca	ThrGGT	20	D-loop	T	2.3015245124112e-10	2.50046	95.3333	12.7041	D	NaBH4
P. halocryophilus	30	cluster2	gcttccatagctcagcaggtagagtgcttccatggtaaggaagaggtcaccggttcgaatccggttggaagctccacca	ThrGGT	20	D-loop	T	6.86568560011486e-11	2.1292	213.333	11.1449	D	NaBH4
P. halocryophilus	10	cluster21	gcggaagtagttcagtggtagaacgccaccttgccaaggtggaggtcgcgagttcgaacctcgtcttccgctccacca	GlyGCC	20	D-loop	T	0	3.38605	1715	17.6527	D	NaBH4
P. halocryophilus	20	cluster21	gcggaagtagttcagtggtagaacgccaccttgccaaggtggaggtcgcgagttcgaacctcgtcttccgctccacca	GlyGCC	20	D-loop	T	0	3.80511	901.667	23.2266	D	NaBH4
P. halocryophilus	30	cluster21	gcggaagtagttcagtggtagaacgccaccttgccaaggtggaggtcgcgagttcgaacctcgtcttccgctccacca	GlyGCC	20	D-loop	T	0	3.29149	3353.33	17.8985	D	NaBH4
P. halocryophilus	10	cluster22	cgcggggtggagcagttcggtagctcgttgggctcataacccaaaggtcgcaggttcaaatcctgcccccgcaaccacca	MetCAT-3	20	D-loop	T	0	4.41603	13671.3	29.4601	D	NaBH4
P. halocryophilus	20	cluster22	cgcggggtggagcagttcggtagctcgttgggctcataacccaaaggtcgcaggttcaaatcctgcccccgcaaccacca	MetCAT-3	20	D-loop	T	0	4.58282	8532	31.9329	D	NaBH4
P. halocryophilus	30	cluster22	cgcggggtggagcagttcggtagctcgttgggctcataacccaaaggtcgcaggttcaaatcctgcccccgcaaccacca	MetCAT-3	20	D-loop	T	0	4.56481	9458	26.962	D	NaBH4
P. halocryophilus	10	cluster24	tccgaagtagctcagtggtagagcaccgcactgttaatgcgatggtcgtaggttcgagtcctaccttcggagccacca	AsnGTT	20	D-loop	T	0	3.62677	1190.67	6.61039	D	NaBH4
P. halocryophilus	20	cluster24	tccgaagtagctcagtggtagagcaccgcactgttaatgcgatggtcgtaggttcgagtcctaccttcggagccacca	AsnGTT	20	D-loop	T	0	3.69023	1086.67	5.20974	D	NaBH4
P. halocryophilus	30	cluster24	tccgaagtagctcagtggtagagcaccgcactgttaatgcgatggtcgtaggttcgagtcctaccttcggagccacca	AsnGTT	20	D-loop	T	0	3.62365	1604.33	6.27794	D	NaBH4
P. halocryophilus	10	cluster27	gggcctatagctcagctggttagagcgcacgcctgataagcgtgaggtcgatggttcgagtccatttaggcccaccacca	IleGAT	20	D-loop	T	0	5.20346	29570.7	79.3724	D	NaBH4
P. halocryophilus	20	cluster27	gggcctatagctcagctggttagagcgcacgcctgataagcgtgaggtcgatggttcgagtccatttaggcccaccacca	IleGAT	20	D-loop	T	0	5.55233	32111.3	82.2691	D	NaBH4
P. halocryophilus	30	cluster27	gggcctatagctcagctggttagagcgcacgcctgataagcgtgaggtcgatggttcgagtccatttaggcccaccacca	IleGAT	20	D-loop	T	0	5.31762	46855	81.4434	D	NaBH4
P. halocryophilus	10	cluster28	gccggagtagctcaactggtagagcaactgacttgtaatcagtaggttgagggttcaagtcctttctccggcaccacca	ThrTGT-2	20	D-loop	T	0	3.59208	897	8.1592	D	NaBH4
P. halocryophilus	20	cluster28	gccggagtagctcaactggtagagcaactgacttgtaatcagtaggttgagggttcaagtcctttctccggcaccacca	ThrTGT-2	20	D-loop	T	0	3.99051	741.667	7.42274	D	NaBH4
P. halocryophilus	30	cluster28	gccggagtagctcaactggtagagcaactgacttgtaatcagtaggttgagggttcaagtcctttctccggcaccacca	ThrTGT-2	20	D-loop	T	0	3.70363	623.667	7.45082	D	NaBH4
P. halocryophilus	10	cluster31	gcgggtgtagtttagtggtaaaacctcagccttccaagctgatgatgggggttcgattccccccacccgctccacca	GlyTCC-1	20	D-loop	T	0	4.37418	8225	62.3923	D	NaBH4
P. halocryophilus	20	cluster31	gcgggtgtagtttagtggtaaaacctcagccttccaagctgatgatgggggttcgattccccccacccgctccacca	GlyTCC-1	20	D-loop	T	0	4.2985	3970	65.3159	D	NaBH4
P. halocryophilus	30	cluster31	gcgggtgtagtttagtggtaaaacctcagccttccaagctgatgatgggggttcgattccccccacccgctccacca	GlyTCC-1	20	D-loop	T	0	4.42675	4748	65.1043	D	NaBH4
P. halocryophilus	10	cluster32	ggtcccgtggtgtagcggttaacatgcctgcctgtcacgcaggagatcgccggttcgatcccggtcgggaccgccacca	AspGTC	20	D-loop	T	0	5.68612	15517.7	88.7755	D	NaBH4
P. halocryophilus	20	cluster32	ggtcccgtggtgtagcggttaacatgcctgcctgtcacgcaggagatcgccggttcgatcccggtcgggaccgccacca	AspGTC	20	D-loop	T	0	5.8942	12088.7	91.2926	D	NaBH4
P. halocryophilus	30	cluster32	ggtcccgtggtgtagcggttaacatgcctgcctgtcacgcaggagatcgccggttcgatcccggtcgggaccgccacca	AspGTC	20	D-loop	T	0	5.63862	27674	89.6229	D	NaBH4
P. halocryophilus	10	cluster34	tggggtatagccaagcggtaaggcaacgggttttgatcccgtcatgccctggttcgaatccaggtaccccagccacca	GlnTTG	20	D-loop	T	5.29858642837206e-14	1.30953	745	12.3687	D	NaBH4
P. halocryophilus	20	cluster34	tggggtatagccaagcggtaaggcaacgggttttgatcccgtcatgccctggttcgaatccaggtaccccagccacca	GlnTTG	20	D-loop	T	7.96876523775132e-12	1.33336	550.667	13.1617	D	NaBH4
P. halocryophilus	30	cluster34	tggggtatagccaagcggtaaggcaacgggttttgatcccgtcatgccctggttcgaatccaggtaccccagccacca	GlnTTG	20	D-loop	T	8.42275430542635e-07	1.13605	460	12.4807	D	NaBH4
P. halocryophilus	10	cluster35	gcgggtgtagtttagtggtaaaacctcagccttccaagctgatgatgagggttcgattcccttcacccgctccacca	GlyTCC-2	20	D-loop	T	0	3.96221	6658	63.5084	D	NaBH4
P. halocryophilus	20	cluster35	gcgggtgtagtttagtggtaaaacctcagccttccaagctgatgatgagggttcgattcccttcacccgctccacca	GlyTCC-2	20	D-loop	T	0	3.73323	2966.67	66.233	D	NaBH4
P. halocryophilus	30	cluster35	gcgggtgtagtttagtggtaaaacctcagccttccaagctgatgatgagggttcgattcccttcacccgctccacca	GlyTCC-2	20	D-loop	T	0	4.0121	4297	65.7992	D	NaBH4
P. halocryophilus	10	cluster4	ggacctttagctcagttggttagagcagacggctcataaccgtccggtcgcaggttcgagtcctgcaaggtccaccacca	MetCAT-1	20	D-loop	T	0	4.78591	339.667	54.1161	D	NaBH4
P. halocryophilus	20	cluster4	ggacctttagctcagttggttagagcagacggctcataaccgtccggtcgcaggttcgagtcctgcaaggtccaccacca	MetCAT-1	20	D-loop	T	0	4.99156	344.667	56.8012	D	NaBH4
P. halocryophilus	30	cluster4	ggacctttagctcagttggttagagcagacggctcataaccgtccggtcgcaggttcgagtcctgcaaggtccaccacca	MetCAT-1	20	D-loop	T	0	4.54645	262	50.1505	D	NaBH4
P. halocryophilus	10	cluster5	aggggcatagtttaacggtagaacagaggtctccaacacctccgatgtgggttcgattcctactgcccctgccacca	TrpCCA	20	D-loop	T	0	3.01353	639.667	15.7897	D	NaBH4
P. halocryophilus	20	cluster5	aggggcatagtttaacggtagaacagaggtctccaacacctccgatgtgggttcgattcctactgcccctgccacca	TrpCCA	20	D-loop	T	0	2.48517	347.333	10.9557	D	NaBH4
P. halocryophilus	30	cluster5	aggggcatagtttaacggtagaacagaggtctccaacacctccgatgtgggttcgattcctactgcccctgccacca	TrpCCA	20	D-loop	T	0	2.85581	1082.33	14.7211	D	NaBH4
P. halocryophilus	20	cluster21	gcggaagtagttcagtggtagaacgccaccttgccaaggtggaggtcgcgagttcgaacctcgtcttccgctccacca	GlyGCC	47	V-region	T	0	2.7432	288.333	2.83367	D	NaBH4
P. halocryophilus	20	cluster22	cgcggggtggagcagttcggtagctcgttgggctcataacccaaaggtcgcaggttcaaatcctgcccccgcaaccacca	MetCAT-3	47	V-region	T	0	3.7581	1271.67	2.42987	D	NaBH4
P. halocryophilus	20	cluster24	tccgaagtagctcagtggtagagcaccgcactgttaatgcgatggtcgtaggttcgagtcctaccttcggagccacca	AsnGTT	47	V-region	T	0	3.63136	878.667	2.18388	D	NaBH4
P. halocryophilus	30	cluster8	ggtggggtagcgaagtggctaaacgcggcggactgtaaatccgctccttcgggttcggcagttcgaatctgccccccaccaccacca	TyrGTA	47	V-region	T	3.00781350860462e-09	1.37264	448.333	2.02544	D	NaBH4
P. halocryophilus	10	cluster1	ggcggcatagccaagtggtaaggcatgggtctgcaacacccttatcaccggttcgagtccggttgccgcctccacca	CysGCA	20a	D-loop	T	0	3.29435	652.333	13.5838	D	NaBH4
P. halocryophilus	20	cluster1	ggcggcatagccaagtggtaaggcatgggtctgcaacacccttatcaccggttcgagtccggttgccgcctccacca	CysGCA	20a	D-loop	T	0	2.9775	295	14.2256	D	NaBH4
P. halocryophilus	30	cluster1	ggcggcatagccaagtggtaaggcatgggtctgcaacacccttatcaccggttcgagtccggttgccgcctccacca	CysGCA	20a	D-loop	T	0	3.08373	579.333	13.6651	D	NaBH4
P. halocryophilus	10	cluster11	gcgcccgtagctcaattggatagagtacttgactacgaatcaagcggttagaggttcgagtcctctcgggcgcaccacca	ArgACG	20a	D-loop	T	0	1.78155	1326.33	14.219	D	NaBH4
P. halocryophilus	20	cluster11	gcgcccgtagctcaattggatagagtacttgactacgaatcaagcggttagaggttcgagtcctctcgggcgcaccacca	ArgACG	20a	D-loop	T	0	1.7535	1278.33	14.9895	D	NaBH4
P. halocryophilus	30	cluster11	gcgcccgtagctcaattggatagagtacttgactacgaatcaagcggttagaggttcgagtcctctcgggcgcaccacca	ArgACG	20a	D-loop	T	0	1.90552	1287	14.133	D	NaBH4
P. halocryophilus	10	cluster12	ggaggaatacccaagtttggctgaagggatcggtcttgaaaaccgacaggggagtcaaatcccgcgggggttcgaatccctcttcctcctccacca	SerTGA	20a	D-loop	T	0	2.44858	611.333	48.823	D	NaBH4
P. halocryophilus	20	cluster12	ggaggaatacccaagtttggctgaagggatcggtcttgaaaaccgacaggggagtcaaatcccgcgggggttcgaatccctcttcctcctccacca	SerTGA	20a	D-loop	T	0	2.39408	421.667	49.4754	D	NaBH4
P. halocryophilus	30	cluster12	ggaggaatacccaagtttggctgaagggatcggtcttgaaaaccgacaggggagtcaaatcccgcgggggttcgaatccctcttcctcctccacca	SerTGA	20a	D-loop	T	0	3.00583	880.667	43.0614	D	NaBH4
P. halocryophilus	10	cluster14	ggccccttggtcaagcggttaagacaccgccctttcacggcggtaacacgggttcgaatcccgtaggggtcaccacca	GluTTC	20a	D-loop	T	0	4.51525	11544	45.6789	D	NaBH4
P. halocryophilus	20	cluster14	ggccccttggtcaagcggttaagacaccgccctttcacggcggtaacacgggttcgaatcccgtaggggtcaccacca	GluTTC	20a	D-loop	T	0	4.69008	12107.7	43.4688	D	NaBH4
P. halocryophilus	30	cluster14	ggccccttggtcaagcggttaagacaccgccctttcacggcggtaacacgggttcgaatcccgtaggggtcaccacca	GluTTC	20a	D-loop	T	0	4.62051	12976.7	50.2289	D	NaBH4
P. halocryophilus	10	cluster15	gtctcagtagctcagctggatagagcaacgcccttctaaggcgtcggtcgggggttcgaatccctcctgggacaccacca	ArgTCT	20a	D-loop	T	0	2.62609	459.667	9.06201	D	NaBH4
P. halocryophilus	20	cluster15	gtctcagtagctcagctggatagagcaacgcccttctaaggcgtcggtcgggggttcgaatccctcctgggacaccacca	ArgTCT	20a	D-loop	T	0	2.74729	328.333	10.2866	D	NaBH4
P. halocryophilus	30	cluster15	gtctcagtagctcagctggatagagcaacgcccttctaaggcgtcggtcgggggttcgaatccctcctgggacaccacca	ArgTCT	20a	D-loop	T	0	2.12846	459.333	8.87894	D	NaBH4
P. halocryophilus	10	cluster23	ggggaagtactcaagtggctgaagaggcgcccctgctaagggtgtaggtcgggcaaccggcgcgagggttcaaatccctccttctccgccacca	SerGCT	20a	D-loop	T	0	3.46949	670	69.9098	D	NaBH4
P. halocryophilus	20	cluster23	ggggaagtactcaagtggctgaagaggcgcccctgctaagggtgtaggtcgggcaaccggcgcgagggttcaaatccctccttctccgccacca	SerGCT	20a	D-loop	T	0	3.25444	317.667	72.1376	D	NaBH4
P. halocryophilus	30	cluster23	ggggaagtactcaagtggctgaagaggcgcccctgctaagggtgtaggtcgggcaaccggcgcgagggttcaaatccctccttctccgccacca	SerGCT	20a	D-loop	T	0	3.20155	343	58.4125	D	NaBH4
P. halocryophilus	10	cluster25	gccctcgtagtgtaatggatcacacgtaagattccggttcttgaaatggaggttcgattccttccgagggcaccacca	ArgCCG	20a	D-loop	T	0	3.85702	541.333	16.8628	D	NaBH4
P. halocryophilus	20	cluster25	gccctcgtagtgtaatggatcacacgtaagattccggttcttgaaatggaggttcgattccttccgagggcaccacca	ArgCCG	20a	D-loop	T	0	4.13131	385.667	19.4516	D	NaBH4
P. halocryophilus	30	cluster25	gccctcgtagtgtaatggatcacacgtaagattccggttcttgaaatggaggttcgattccttccgagggcaccacca	ArgCCG	20a	D-loop	T	0	3.98456	601.333	17.3294	D	NaBH4
P. halocryophilus	10	cluster27	gggcctatagctcagctggttagagcgcacgcctgataagcgtgaggtcgatggttcgagtccatttaggcccaccacca	IleGAT	20a	D-loop	T	0	4.09838	11415.7	23.0144	D	NaBH4
P. halocryophilus	20	cluster27	gggcctatagctcagctggttagagcgcacgcctgataagcgtgaggtcgatggttcgagtccatttaggcccaccacca	IleGAT	20a	D-loop	T	0	4.13879	10614	21.3976	D	NaBH4
P. halocryophilus	30	cluster27	gggcctatagctcagctggttagagcgcacgcctgataagcgtgaggtcgatggttcgagtccatttaggcccaccacca	IleGAT	20a	D-loop	T	0	3.79447	16372	22.1234	D	NaBH4
P. halocryophilus	10	cluster32	ggtcccgtggtgtagcggttaacatgcctgcctgtcacgcaggagatcgccggttcgatcccggtcgggaccgccacca	AspGTC	20a	D-loop	T	0	4.85071	12014.3	40.2576	D	NaBH4
P. halocryophilus	20	cluster32	ggtcccgtggtgtagcggttaacatgcctgcctgtcacgcaggagatcgccggttcgatcccggtcgggaccgccacca	AspGTC	20a	D-loop	T	0	5.04213	8472	38.9271	D	NaBH4
P. halocryophilus	30	cluster32	ggtcccgtggtgtagcggttaacatgcctgcctgtcacgcaggagatcgccggttcgatcccggtcgggaccgccacca	AspGTC	20a	D-loop	T	0	4.72866	20881.3	40.3048	D	NaBH4
P. halocryophilus	10	cluster4	ggacctttagctcagttggttagagcagacggctcataaccgtccggtcgcaggttcgagtcctgcaaggtccaccacca	MetCAT-1	20a	D-loop	T	0	3.69711	193	23.5896	D	NaBH4
P. halocryophilus	20	cluster4	ggacctttagctcagttggttagagcagacggctcataaccgtccggtcgcaggttcgagtcctgcaaggtccaccacca	MetCAT-1	20a	D-loop	T	0	3.89109	167.667	21.5864	D	NaBH4
P. halocryophilus	30	cluster4	ggacctttagctcagttggttagagcagacggctcataaccgtccggtcgcaggttcgagtcctgcaaggtccaccacca	MetCAT-1	20a	D-loop	T	3.16388026888603e-11	3.16083	128.667	19.735	D	NaBH4
P. halocryophilus	10	cluster6	gcggtcgtggcgaagtggttaacgcaccggattgtgattccggcactcgggggttcaattcccctcgtccgccccacca	HisGTG	20a	D-loop	T	0	2.92264	1808.33	35.8485	D	NaBH4
P. halocryophilus	20	cluster6	gcggtcgtggcgaagtggttaacgcaccggattgtgattccggcactcgggggttcaattcccctcgtccgccccacca	HisGTG	20a	D-loop	T	0	3.21708	3008.33	38.8148	D	NaBH4
P. halocryophilus	30	cluster6	gcggtcgtggcgaagtggttaacgcaccggattgtgattccggcactcgggggttcaattcccctcgtccgccccacca	HisGTG	20a	D-loop	T	0	2.90688	3974.33	36.9983	D	NaBH4
P. halocryophilus	10	cluster9	ggcggcgtagctcagctggctagagcgtacggttcatacccgtgaggtcgggggttcgatcccctctgccgccaccacca	MetCAT-2	20a	D-loop	T	0	3.16638	1770.33	15.7124	D	NaBH4
P. halocryophilus	20	cluster9	ggcggcgtagctcagctggctagagcgtacggttcatacccgtgaggtcgggggttcgatcccctctgccgccaccacca	MetCAT-2	20a	D-loop	T	0	2.91436	764.667	19.0278	D	NaBH4
P. halocryophilus	30	cluster9	ggcggcgtagctcagctggctagagcgtacggttcatacccgtgaggtcgggggttcgatcccctctgccgccaccacca	MetCAT-2	20a	D-loop	T	0	2.86591	1278.33	16.0547	D	NaBH4

## Sheet: E. sibiricum
Species	Temperature	Cluster ID	tRNA sequence	Anticodon	tRNA position	tRNA area	REF	adj. P value	Fold change	# RTs	% RTs	Modification	Treatment
E. sibiricum	10	cluster20	ggctttgtagctcagtcggtagagcagaggactgaaaatcctcgtgtcggcggttcgattccgtccaaagccaccacca	PheGAA	8	after 5' ACC-stem	T	3.24905168140825e-07	1.32322	270.333	5.9057	s4U	NaBH4
E. sibiricum	30	cluster33	ggaggattagctcagctgggagagcatctgccttacaagcagagggtcggcggttcgatcccgtcatcctccaccacca	ValTAC	8	after 5' ACC-stem	T	2.06368767388721e-05	1.79042	81.6667	2.21706	s4U	NaBH4
E. sibiricum	10	cluster36	ggggccttagctcagctgggagagcgcctgccttgcacgcaggaggtcagcggttcgatcccgctaggctccaccacca	AlaTGC	8	after 5' ACC-stem	T	1.37167029871185e-12	2.62456	156	3.79324	s4U	NaBH4
E. sibiricum	10	cluster37	gattctgtagctcagctgggagagcgctaccttgacagggtagaggtcgctggttcgagcccagtcagaatcaccacca	ValGAC	8	after 5' ACC-stem	T	1.45937282420412e-07	1.68748	176	6.13095	s4U	NaBH4
E. sibiricum	10	cluster1	gcggaagtagttcagtggtagaatacgaccttgccaaggtcggggtcgcgggttcgaatcccgtcttccgctccacca	GlyGCC	46	V-region	G	0	4.94818	8905.33	49.7784	m7G	NaBH4
E. sibiricum	20	cluster1	gcggaagtagttcagtggtagaatacgaccttgccaaggtcggggtcgcgggttcgaatcccgtcttccgctccacca	GlyGCC	46	V-region	G	0	6.5948	8722.67	55.51	m7G	NaBH4
E. sibiricum	30	cluster1	gcggaagtagttcagtggtagaatacgaccttgccaaggtcggggtcgcgggttcgaatcccgtcttccgctccacca	GlyGCC	46	V-region	G	0	7.02253	13099	60.2671	m7G	NaBH4
E. sibiricum	10	cluster11	gggcctatagctcagctggttagagcgcacgcctgataagcgtgaggtcggtggttcgagtccacttaggcccaccacca	IleGAT	46	V-region	G	0	4.76161	3787.33	10.418	m7G	NaBH4
E. sibiricum	20	cluster11	gggcctatagctcagctggttagagcgcacgcctgataagcgtgaggtcggtggttcgagtccacttaggcccaccacca	IleGAT	46	V-region	G	0	5.65456	6659	10.7751	m7G	NaBH4
E. sibiricum	30	cluster11	gggcctatagctcagctggttagagcgcacgcctgataagcgtgaggtcggtggttcgagtccacttaggcccaccacca	IleGAT	46	V-region	G	0	6.28606	6234	12.163	m7G	NaBH4
E. sibiricum	10	cluster15	gcacccttagctcagctggatagagtacttgactacgaatcaaggggtcgggagttcgaatctctcagggtgcaccacca	ArgACG	46	V-region	G	0	3.56979	3113	28.5603	m7G	NaBH4
E. sibiricum	20	cluster15	gcacccttagctcagctggatagagtacttgactacgaatcaaggggtcgggagttcgaatctctcagggtgcaccacca	ArgACG	46	V-region	G	0	4.78645	3613.33	36.7163	m7G	NaBH4
E. sibiricum	30	cluster15	gcacccttagctcagctggatagagtacttgactacgaatcaaggggtcgggagttcgaatctctcagggtgcaccacca	ArgACG	46	V-region	G	0	5.50999	5243.33	42.1514	m7G	NaBH4
E. sibiricum	10	cluster18	ggacccttagctcagctggttagagctgacggctcataaccgtccggtcgcaggttcgagtcctgcagggtccaccacca	MetCAT-3	46	V-region	G	0	4.4599	1135.33	21.1452	m7G	NaBH4
E. sibiricum	20	cluster18	ggacccttagctcagctggttagagctgacggctcataaccgtccggtcgcaggttcgagtcctgcagggtccaccacca	MetCAT-3	46	V-region	G	0	6.72885	2264	25.8663	m7G	NaBH4
E. sibiricum	30	cluster18	ggacccttagctcagctggttagagctgacggctcataaccgtccggtcgcaggttcgagtcctgcagggtccaccacca	MetCAT-3	46	V-region	G	0	7.15214	2313.67	30.2791	m7G	NaBH4
E. sibiricum	10	cluster20	ggctttgtagctcagtcggtagagcagaggactgaaaatcctcgtgtcggcggttcgattccgtccaaagccaccacca	PheGAA	46	V-region	G	0	5.07628	7513.33	30.7654	m7G	NaBH4
E. sibiricum	20	cluster20	ggctttgtagctcagtcggtagagcagaggactgaaaatcctcgtgtcggcggttcgattccgtccaaagccaccacca	PheGAA	46	V-region	G	0	6.41349	13155.7	32.2581	m7G	NaBH4
E. sibiricum	30	cluster20	ggctttgtagctcagtcggtagagcagaggactgaaaatcctcgtgtcggcggttcgattccgtccaaagccaccacca	PheGAA	46	V-region	G	0	6.73306	10274	37.3622	m7G	NaBH4
E. sibiricum	10	cluster21	cgggaagtagctcagcttggtagagcacttggtttgggaccaaggggtcgcaggttcgaatcctgtcttcccgaccacca	ProTGG	46	V-region	G	0	7.36481	14688	25.8297	m7G	NaBH4
E. sibiricum	20	cluster21	cgggaagtagctcagcttggtagagcacttggtttgggaccaaggggtcgcaggttcgaatcctgtcttcccgaccacca	ProTGG	46	V-region	G	0	7.79757	18474.3	37.702	m7G	NaBH4
E. sibiricum	30	cluster21	cgggaagtagctcagcttggtagagcacttggtttgggaccaaggggtcgcaggttcgaatcctgtcttcccgaccacca	ProTGG	46	V-region	G	0	8.26113	15437.3	41.0464	m7G	NaBH4
E. sibiricum	10	cluster22	gtctcaatagctcagctggatagagcaacgcccttctaaggcgtcggtcgggggttcgaatccctcttgggacaccacca	ArgTCT	46	V-region	G	0	4.42656	2028.67	52.961	m7G	NaBH4
E. sibiricum	20	cluster22	gtctcaatagctcagctggatagagcaacgcccttctaaggcgtcggtcgggggttcgaatccctcttgggacaccacca	ArgTCT	46	V-region	G	0	5.26318	2048.33	54.7902	m7G	NaBH4
E. sibiricum	30	cluster22	gtctcaatagctcagctggatagagcaacgcccttctaaggcgtcggtcgggggttcgaatccctcttgggacaccacca	ArgTCT	46	V-region	G	0	6.08239	2673	60.972	m7G	NaBH4
E. sibiricum	10	cluster26	gtgtcattagctcagttggtagagcatctgacttttaatcagagggtcgcaggttcgaatcctgcatgacacaccacca	LysTTT-1	46	V-region	G	0	6.81072	13961.3	28.4506	m7G	NaBH4
E. sibiricum	20	cluster26	gtgtcattagctcagttggtagagcatctgacttttaatcagagggtcgcaggttcgaatcctgcatgacacaccacca	LysTTT-1	46	V-region	G	0	7.91093	24815.3	28.5996	m7G	NaBH4
E. sibiricum	30	cluster26	gtgtcattagctcagttggtagagcatctgacttttaatcagagggtcgcaggttcgaatcctgcatgacacaccacca	LysTTT-1	46	V-region	G	0	8.03799	19300	30.3869	m7G	NaBH4
E. sibiricum	10	cluster27	gccggtgtagctcagctggtagagcaactgacttgtaatcagtaggtcgcgggttcgactcctgttgccggcaccacca	ThrTGT	46	V-region	G	0	5.51596	4058	35.2798	m7G	NaBH4
E. sibiricum	20	cluster27	gccggtgtagctcagctggtagagcaactgacttgtaatcagtaggtcgcgggttcgactcctgttgccggcaccacca	ThrTGT	46	V-region	G	0	6.063	4198.67	44.1232	m7G	NaBH4
E. sibiricum	30	cluster27	gccggtgtagctcagctggtagagcaactgacttgtaatcagtaggtcgcgggttcgactcctgttgccggcaccacca	ThrTGT	46	V-region	G	0	6.51816	9564.33	49.8919	m7G	NaBH4
E. sibiricum	10	cluster3	tccgcaatagctcagtggtagagcaaccggctgttaaccggtaggtcgtaggttcaaatcctacttgcggagccacca	AsnGTT	46	V-region	G	0	5.4357	26148.3	54.8256	m7G	NaBH4
E. sibiricum	20	cluster3	tccgcaatagctcagtggtagagcaaccggctgttaaccggtaggtcgtaggttcaaatcctacttgcggagccacca	AsnGTT	46	V-region	G	0	6.54485	43906.7	54.5595	m7G	NaBH4
E. sibiricum	30	cluster3	tccgcaatagctcagtggtagagcaaccggctgttaaccggtaggtcgtaggttcaaatcctacttgcggagccacca	AsnGTT	46	V-region	G	0	6.62039	31806.3	58.4176	m7G	NaBH4
E. sibiricum	10	cluster30	gagccattagctcagttggtagagcatctgacttttaatcagagggtcgcaggttcgaatcctgcatggctcaccacca	LysTTT-2	46	V-region	G	0	6.15708	5838.33	29.813	m7G	NaBH4
E. sibiricum	20	cluster30	gagccattagctcagttggtagagcatctgacttttaatcagagggtcgcaggttcgaatcctgcatggctcaccacca	LysTTT-2	46	V-region	G	0	7.78937	10084	29.5759	m7G	NaBH4
E. sibiricum	30	cluster30	gagccattagctcagttggtagagcatctgacttttaatcagagggtcgcaggttcgaatcctgcatggctcaccacca	LysTTT-2	46	V-region	G	0	7.9	9282.67	34.0126	m7G	NaBH4
E. sibiricum	10	cluster33	ggaggattagctcagctgggagagcatctgccttacaagcagagggtcggcggttcgatcccgtcatcctccaccacca	ValTAC	46	V-region	G	0	5.21569	5241	30.4094	m7G	NaBH4
E. sibiricum	20	cluster33	ggaggattagctcagctgggagagcatctgccttacaagcagagggtcggcggttcgatcccgtcatcctccaccacca	ValTAC	46	V-region	G	0	6.103	4165.67	31.7693	m7G	NaBH4
E. sibiricum	30	cluster33	ggaggattagctcagctgggagagcatctgccttacaagcagagggtcggcggttcgatcccgtcatcctccaccacca	ValTAC	46	V-region	G	0	7.04349	6554.67	41.5286	m7G	NaBH4
E. sibiricum	10	cluster35	gcacccgtagctcaggggatagagcactggtttccggtaccaggtgtcgggagttcaaatctctccgggtgtaccacca	ArgCCG	46	V-region	G	0	5.19766	2355.67	16.4364	m7G	NaBH4
E. sibiricum	20	cluster35	gcacccgtagctcaggggatagagcactggtttccggtaccaggtgtcgggagttcaaatctctccgggtgtaccacca	ArgCCG	46	V-region	G	0	5.47883	1506.33	20.0941	m7G	NaBH4
E. sibiricum	30	cluster35	gcacccgtagctcaggggatagagcactggtttccggtaccaggtgtcgggagttcaaatctctccgggtgtaccacca	ArgCCG	46	V-region	G	0	5.99378	2113.67	25.5343	m7G	NaBH4
E. sibiricum	10	cluster36	ggggccttagctcagctgggagagcgcctgccttgcacgcaggaggtcagcggttcgatcccgctaggctccaccacca	AlaTGC	46	V-region	G	0	6.04832	7919	34.2947	m7G	NaBH4
E. sibiricum	20	cluster36	ggggccttagctcagctgggagagcgcctgccttgcacgcaggaggtcagcggttcgatcccgctaggctccaccacca	AlaTGC	46	V-region	G	0	7.02664	8592.33	39.1922	m7G	NaBH4
E. sibiricum	30	cluster36	ggggccttagctcagctgggagagcgcctgccttgcacgcaggaggtcagcggttcgatcccgctaggctccaccacca	AlaTGC	46	V-region	G	0	7.94096	15701.7	48.7397	m7G	NaBH4
E. sibiricum	10	cluster37	gattctgtagctcagctgggagagcgctaccttgacagggtagaggtcgctggttcgagcccagtcagaatcaccacca	ValGAC	46	V-region	G	0	5.45498	5972.33	31.1068	m7G	NaBH4
E. sibiricum	20	cluster37	gattctgtagctcagctgggagagcgctaccttgacagggtagaggtcgctggttcgagcccagtcagaatcaccacca	ValGAC	46	V-region	G	0	6.58458	7494	38.4015	m7G	NaBH4
E. sibiricum	30	cluster37	gattctgtagctcagctgggagagcgctaccttgacagggtagaggtcgctggttcgagcccagtcagaatcaccacca	ValGAC	46	V-region	G	0	7.13952	10997.3	44.058	m7G	NaBH4
E. sibiricum	10	cluster7	ggcggtgtagctcagctggctagagcgtacggttcatacccgtgaggtcgtgggttcgactccctccgccgctaccacca	MetCAT-1	46	V-region	G	0	5.30119	2147	36.6264	m7G	NaBH4
E. sibiricum	20	cluster7	ggcggtgtagctcagctggctagagcgtacggttcatacccgtgaggtcgtgggttcgactccctccgccgctaccacca	MetCAT-1	46	V-region	G	0	5.85689	2011.33	43.711	m7G	NaBH4
E. sibiricum	30	cluster7	ggcggtgtagctcagctggctagagcgtacggttcatacccgtgaggtcgtgggttcgactccctccgccgctaccacca	MetCAT-1	46	V-region	G	0	6.83479	2691	51.8672	m7G	NaBH4
E. sibiricum	10	cluster8	gggggcttagctcagctgggagagcgtttggctggcagccaaaaggtcgtcggttcgagcccgatagtctccaccacca	AlaGGC	46	V-region	G	0	5.5303	1243.67	34.6261	m7G	NaBH4
E. sibiricum	20	cluster8	gggggcttagctcagctgggagagcgtttggctggcagccaaaaggtcgtcggttcgagcccgatagtctccaccacca	AlaGGC	46	V-region	G	0	5.54397	615	41.5943	m7G	NaBH4
E. sibiricum	30	cluster8	gggggcttagctcagctgggagagcgtttggctggcagccaaaaggtcgtcggttcgagcccgatagtctccaccacca	AlaGGC	46	V-region	G	0	5.75525	690	50.705	m7G	NaBH4
E. sibiricum	10	cluster9	cgcggggtggagcagtctggtagctcgttgggctcataacccaaaggtcgtcggttcaaatccggcccccgcaaccacca	MetCAT-2	46	V-region	G	0	3.68419	498.667	3.7725	m7G	NaBH4
E. sibiricum	20	cluster9	cgcggggtggagcagtctggtagctcgttgggctcataacccaaaggtcgtcggttcaaatccggcccccgcaaccacca	MetCAT-2	46	V-region	G	0	5.88353	1906.67	9.90643	m7G	NaBH4
E. sibiricum	30	cluster9	cgcggggtggagcagtctggtagctcgttgggctcataacccaaaggtcgtcggttcaaatccggcccccgcaaccacca	MetCAT-2	46	V-region	G	0	6.04351	1429.33	9.44605	m7G	NaBH4
E. sibiricum	10	cluster1	gcggaagtagttcagtggtagaatacgaccttgccaaggtcggggtcgcgggttcgaatcccgtcttccgctccacca	GlyGCC	48	V-region	C	0	2.31955	404.333	2.13334	FP type II	NaBH4
E. sibiricum	20	cluster11	gggcctatagctcagctggttagagcgcacgcctgataagcgtgaggtcggtggttcgagtccacttaggcccaccacca	IleGAT	37	AC-loop	A	0	1.37316	2935.33	5.87493	FP type II	NaBH4
E. sibiricum	30	cluster11	gggcctatagctcagctggttagagcgcacgcctgataagcgtgaggtcggtggttcgagtccacttaggcccaccacca	IleGAT	37	AC-loop	A	0	1.49648	1949	4.73853	FP type II	NaBH4
E. sibiricum	10	cluster12	gccggggtggcggaactggtagacgcacaggacttaaaatcctgcgggggtttccccgtgccggttcgattccggccctcggtaccacca	LeuTAA	14	D-loop	A	0.00365741	1.49024	50	7.71693	FP type II	NaBH4
E. sibiricum	10	cluster13	aggggcatagtttagcggtagaactacggtctccaaaaccgtcagcgcgggttcgattcctgctgcccctgccacca	TrpCCA	48	V-region	C	0.000657087	1.34206	113.333	2.96081	FP type II	NaBH4
E. sibiricum	10	cluster13	aggggcatagtttagcggtagaactacggtctccaaaaccgtcagcgcgggttcgattcctgctgcccctgccacca	TrpCCA	50	5' T-stem	C	0.00314774	1.24889	82.3333	2.07557	FP type II	NaBH4
E. sibiricum	20	cluster13	aggggcatagtttagcggtagaactacggtctccaaaaccgtcagcgcgggttcgattcctgctgcccctgccacca	TrpCCA	56	T-loop	C	0	2.48202	46.6667	2.14422	FP type II	NaBH4
E. sibiricum	30	cluster13	aggggcatagtttagcggtagaactacggtctccaaaaccgtcagcgcgggttcgattcctgctgcccctgccacca	TrpCCA	58	T-loop	A	0	3.68906	100.667	2.53195	FP type II	NaBH4
E. sibiricum	30	cluster13	aggggcatagtttagcggtagaactacggtctccaaaaccgtcagcgcgggttcgattcctgctgcccctgccacca	TrpCCA	50	5' T-stem	C	2.95058064783683e-07	2.01961	71.3333	2.01015	FP type II	NaBH4
E. sibiricum	30	cluster14	ggagtcgtacccaagcccggctgaaggggacggactcgaaatccgttaggggtcgcaaggcccgcgtgggttcgaatcccaccgactccgccacca	SerCGA	46	V-region	C	0.00897289	1.10021	51	10.2899	FP type II	NaBH4
E. sibiricum	10	cluster15	gcacccttagctcagctggatagagtacttgactacgaatcaaggggtcgggagttcgaatctctcagggtgcaccacca	ArgACG	48	V-region	C	0	2.18124	375	3.31948	FP type II	NaBH4
E. sibiricum	20	cluster15	gcacccttagctcagctggatagagtacttgactacgaatcaaggggtcgggagttcgaatctctcagggtgcaccacca	ArgACG	48	V-region	C	7.70986147633863e-12	2.10424	234.667	2.22384	FP type II	NaBH4
E. sibiricum	30	cluster15	gcacccttagctcagctggatagagtacttgactacgaatcaaggggtcgggagttcgaatctctcagggtgcaccacca	ArgACG	48	V-region	C	0	2.38398	279.667	2.17036	FP type II	NaBH4
E. sibiricum	10	cluster16	ggcccgttggtcaagcggttaagacaccgccctttcacggcggtaacacgggttcgattcccgtacgggtcaccacca	GluTTC-1	21	D-loop	A	0	3.00195	6299.33	19.5111	FP type II	NaBH4
E. sibiricum	20	cluster16	ggcccgttggtcaagcggttaagacaccgccctttcacggcggtaacacgggttcgattcccgtacgggtcaccacca	GluTTC-1	21	D-loop	A	0	2.91544	10025.7	26.2632	FP type II	NaBH4
E. sibiricum	30	cluster16	ggcccgttggtcaagcggttaagacaccgccctttcacggcggtaacacgggttcgattcccgtacgggtcaccacca	GluTTC-1	21	D-loop	A	0	2.9777	7568.33	25.5869	FP type II	NaBH4
E. sibiricum	10	cluster17	tgggctgtggccaagtggtaaggcactggattttgattccagcatgcgaaggttcgatcccttccagcccagccacca	GlnTTG	21	D-loop	A	0	1.92464	2378.67	30.1584	FP type II	NaBH4
E. sibiricum	20	cluster17	tgggctgtggccaagtggtaaggcactggattttgattccagcatgcgaaggttcgatcccttccagcccagccacca	GlnTTG	21	D-loop	A	0	3.10349	3247.33	22.2558	FP type II	NaBH4
E. sibiricum	20	cluster17	tgggctgtggccaagtggtaaggcactggattttgattccagcatgcgaaggttcgatcccttccagcccagccacca	GlnTTG	60	T-loop	C	0	3.8671	562.667	2.37266	FP type II	NaBH4
E. sibiricum	30	cluster17	tgggctgtggccaagtggtaaggcactggattttgattccagcatgcgaaggttcgatcccttccagcccagccacca	GlnTTG	21	D-loop	A	0	3.26985	2608	24.3239	FP type II	NaBH4
E. sibiricum	30	cluster17	tgggctgtggccaagtggtaaggcactggattttgattccagcatgcgaaggttcgatcccttccagcccagccacca	GlnTTG	60	T-loop	C	0	4.39372	515.333	2.91829	FP type II	NaBH4
E. sibiricum	10	cluster20	ggctttgtagctcagtcggtagagcagaggactgaaaatcctcgtgtcggcggttcgattccgtccaaagccaccacca	PheGAA	43	3' AC-stem	C	0	1.99376	758.667	5.30981	FP type II	NaBH4
E. sibiricum	10	cluster20	ggctttgtagctcagtcggtagagcagaggactgaaaatcctcgtgtcggcggttcgattccgtccaaagccaccacca	PheGAA	41	3' AC-stem	C	8.1570691282643e-10	1.58394	285.333	2.18961	FP type II	NaBH4
E. sibiricum	10	cluster20	ggctttgtagctcagtcggtagagcagaggactgaaaatcctcgtgtcggcggttcgattccgtccaaagccaccacca	PheGAA	48	V-region	C	0	3.03145	831	3.3027	FP type II	NaBH4
E. sibiricum	20	cluster20	ggctttgtagctcagtcggtagagcagaggactgaaaatcctcgtgtcggcggttcgattccgtccaaagccaccacca	PheGAA	43	3' AC-stem	C	0	3.0006	1481	6.32727	FP type II	NaBH4
E. sibiricum	20	cluster20	ggctttgtagctcagtcggtagagcagaggactgaaaatcctcgtgtcggcggttcgattccgtccaaagccaccacca	PheGAA	48	V-region	C	0	3.87693	1070.33	2.47538	FP type II	NaBH4
E. sibiricum	30	cluster20	ggctttgtagctcagtcggtagagcagaggactgaaaatcctcgtgtcggcggttcgattccgtccaaagccaccacca	PheGAA	43	3' AC-stem	C	0	2.96037	919	6.4151	FP type II	NaBH4
E. sibiricum	30	cluster20	ggctttgtagctcagtcggtagagcagaggactgaaaatcctcgtgtcggcggttcgattccgtccaaagccaccacca	PheGAA	48	V-region	C	0	3.97787	710.667	2.4708	FP type II	NaBH4
E. sibiricum	20	cluster23	ggagatgtacccaagtggctataaggggcgcccctgctaagggtgtaggccgggaaactggtgcgagggttcgaatccctccatctccgccacca	SerGCT	56	T-loop	C	0	1.85316	28.6667	2.43596	FP type II	NaBH4
E. sibiricum	30	cluster23	ggagatgtacccaagtggctataaggggcgcccctgctaagggtgtaggccgggaaactggtgcgagggttcgaatccctccatctccgccacca	SerGCT	56	T-loop	C	0	1.93179	30.6667	3.51852	FP type II	NaBH4
E. sibiricum	30	cluster23	ggagatgtacccaagtggctataaggggcgcccctgctaagggtgtaggccgggaaactggtgcgagggttcgaatccctccatctccgccacca	SerGCT	61	3' T-stem	C	0	2.08943	31	3.14487	FP type II	NaBH4
E. sibiricum	30	cluster23	ggagatgtacccaagtggctataaggggcgcccctgctaagggtgtaggccgggaaactggtgcgagggttcgaatccctccatctccgccacca	SerGCT	62	3' T-stem	C	0	2.33285	37.6667	3.71712	FP type II	NaBH4
E. sibiricum	30	cluster24	ggagagctgtccgagtggccgaaggagcacgattggaaatcgtgtaggcgtcataagcgtctcaagggttcgaatcccttgctctccgccacca	SerGGA	56	T-loop	C	0	1.92338	28.3333	3.58696	FP type II	NaBH4
E. sibiricum	30	cluster24	ggagagctgtccgagtggccgaaggagcacgattggaaatcgtgtaggcgtcataagcgtctcaagggttcgaatcccttgctctccgccacca	SerGGA	61	3' T-stem	C	0	2.12374	32.3333	3.46266	FP type II	NaBH4
E. sibiricum	10	cluster26	gtgtcattagctcagttggtagagcatctgacttttaatcagagggtcgcaggttcgaatcctgcatgacacaccacca	LysTTT-1	26	after 3' D-stem	A	0.000453725	1.1554	160.333	2.93341	FP type II	NaBH4
E. sibiricum	10	cluster26	gtgtcattagctcagttggtagagcatctgacttttaatcagagggtcgcaggttcgaatcctgcatgacacaccacca	LysTTT-1	28	5' AC-stem	C	2.54389329178481e-09	1.38784	344.333	5.8332	FP type II	NaBH4
E. sibiricum	20	cluster26	gtgtcattagctcagttggtagagcatctgacttttaatcagagggtcgcaggttcgaatcctgcatgacacaccacca	LysTTT-1	13	5' D-stem	C	0	1.62371	31.3333	5.21297	FP type II	NaBH4
E. sibiricum	20	cluster26	gtgtcattagctcagttggtagagcatctgacttttaatcagagggtcgcaggttcgaatcctgcatgacacaccacca	LysTTT-1	31	5' AC-stem	A	0.000191198	1.42756	105.333	3.25643	FP type II	NaBH4
E. sibiricum	20	cluster26	gtgtcattagctcagttggtagagcatctgacttttaatcagagggtcgcaggttcgaatcctgcatgacacaccacca	LysTTT-1	32	AC-loop	C	0	1.4493	694	18.6475	FP type II	NaBH4
E. sibiricum	30	cluster26	gtgtcattagctcagttggtagagcatctgacttttaatcagagggtcgcaggttcgaatcctgcatgacacaccacca	LysTTT-1	13	5' D-stem	C	0	1.79175	31	5.03346	FP type II	NaBH4
E. sibiricum	30	cluster26	gtgtcattagctcagttggtagagcatctgacttttaatcagagggtcgcaggttcgaatcctgcatgacacaccacca	LysTTT-1	31	5' AC-stem	A	0.000624782	1.2552	89	2.99452	FP type II	NaBH4
E. sibiricum	30	cluster26	gtgtcattagctcagttggtagagcatctgacttttaatcagagggtcgcaggttcgaatcctgcatgacacaccacca	LysTTT-1	32	AC-loop	C	2.79424346908504e-12	1.24141	591.667	16.4199	FP type II	NaBH4
E. sibiricum	10	cluster27	gccggtgtagctcagctggtagagcaactgacttgtaatcagtaggtcgcgggttcgactcctgttgccggcaccacca	ThrTGT	48	V-region	C	0	2.46595	252.667	2.11166	FP type II	NaBH4
E. sibiricum	10	cluster28	gggggggtagcgaagtggctaaacgcggcggactgtaaatccgctccctcgggttcggcggttcgaatccgcccccccccaccacca	TyrGTA	12e	V-region	C	1.42098946887655e-07	1.54654	198	3.63281	FP type II	NaBH4
E. sibiricum	10	cluster28	gggggggtagcgaagtggctaaacgcggcggactgtaaatccgctccctcgggttcggcggttcgaatccgcccccccccaccacca	TyrGTA	3e	V-region	C	0.00106297	1.06137	150	2.63484	FP type II	NaBH4
E. sibiricum	10	cluster28	gggggggtagcgaagtggctaaacgcggcggactgtaaatccgctccctcgggttcggcggttcgaatccgcccccccccaccacca	TyrGTA	48	V-region	C	0	2.49366	242	3.45804	FP type II	NaBH4
E. sibiricum	10	cluster28	gggggggtagcgaagtggctaaacgcggcggactgtaaatccgctccctcgggttcggcggttcgaatccgcccccccccaccacca	TyrGTA	11e	V-region	C	0.00774494	1.09592	107.667	2.04487	FP type II	NaBH4
E. sibiricum	20	cluster28	gggggggtagcgaagtggctaaacgcggcggactgtaaatccgctccctcgggttcggcggttcgaatccgcccccccccaccacca	TyrGTA	48	V-region	C	2.66952760628429e-05	1.828	62.6667	2.55327	FP type II	NaBH4
E. sibiricum	30	cluster28	gggggggtagcgaagtggctaaacgcggcggactgtaaatccgctccctcgggttcggcggttcgaatccgcccccccccaccacca	TyrGTA	48	V-region	C	2.74797180717637e-08	2.42091	82	2.54548	FP type II	NaBH4
E. sibiricum	10	cluster29	gcggtcgtggcggaatggtagacgcgctaggttgagggcctagtggtggcaacactgtggaggttcaagtcctctcgaccgcaccacca	LeuGAG	56	T-loop	C	0	2.27664	490.667	3.08347	FP type II	NaBH4
E. sibiricum	10	cluster29	gcggtcgtggcggaatggtagacgcgctaggttgagggcctagtggtggcaacactgtggaggttcaagtcctctcgaccgcaccacca	LeuGAG	22e	V-region	C	4.03459997187745e-14	1.72616	362.667	2.76364	FP type II	NaBH4
E. sibiricum	20	cluster29	gcggtcgtggcggaatggtagacgcgctaggttgagggcctagtggtggcaacactgtggaggttcaagtcctctcgaccgcaccacca	LeuGAG	56	T-loop	C	0	3.57683	239.667	2.08932	FP type II	NaBH4
E. sibiricum	30	cluster29	gcggtcgtggcggaatggtagacgcgctaggttgagggcctagtggtggcaacactgtggaggttcaagtcctctcgaccgcaccacca	LeuGAG	56	T-loop	C	0	3.91875	319.667	2.87513	FP type II	NaBH4
E. sibiricum	10	cluster3	tccgcaatagctcagtggtagagcaaccggctgttaaccggtaggtcgtaggttcaaatcctacttgcggagccacca	AsnGTT	56	T-loop	C	0	2.07216	1407	2.58895	FP type II	NaBH4
E. sibiricum	30	cluster3	tccgcaatagctcagtggtagagcaaccggctgttaaccggtaggtcgtaggttcaaatcctacttgcggagccacca	AsnGTT	56	T-loop	C	0	3.62626	1283	2.16564	FP type II	NaBH4
E. sibiricum	10	cluster30	gagccattagctcagttggtagagcatctgacttttaatcagagggtcgcaggttcgaatcctgcatggctcaccacca	LysTTT-2	32	AC-loop	C	2.21950181940431e-06	1.24773	253.667	7.55821	FP type II	NaBH4
E. sibiricum	10	cluster30	gagccattagctcagttggtagagcatctgacttttaatcagagggtcgcaggttcgaatcctgcatggctcaccacca	LysTTT-2	13	5' D-stem	C	0	3.28237	180	30.434	FP type II	NaBH4
E. sibiricum	20	cluster30	gagccattagctcagttggtagagcatctgacttttaatcagagggtcgcaggttcgaatcctgcatggctcaccacca	LysTTT-2	13	5' D-stem	C	3.06447794806827e-06	2.57803	72	29.6934	FP type II	NaBH4
E. sibiricum	20	cluster30	gagccattagctcagttggtagagcatctgacttttaatcagagggtcgcaggttcgaatcctgcatggctcaccacca	LysTTT-2	32	AC-loop	C	4.54254432676055e-05	1.44916	146	9.29192	FP type II	NaBH4
E. sibiricum	30	cluster30	gagccattagctcagttggtagagcatctgacttttaatcagagggtcgcaggttcgaatcctgcatggctcaccacca	LysTTT-2	32	AC-loop	C	0.000216865	1.16269	146.333	8.1806	FP type II	NaBH4
E. sibiricum	30	cluster30	gagccattagctcagttggtagagcatctgacttttaatcagagggtcgcaggttcgaatcctgcatggctcaccacca	LysTTT-2	13	5' D-stem	C	2.74797180717637e-08	2.53021	76.3333	28.0192	FP type II	NaBH4
E. sibiricum	10	cluster31	gcttccgtaggttaatggcagacctcagcaatggtaatgctgcagtgcgagttcgattctcgccggaagcaccacca	ThrGGT	30	5' AC-stem	C	0.00900444	1.21365	75	12.1966	FP type II	NaBH4
E. sibiricum	10	cluster31	gcttccgtaggttaatggcagacctcagcaatggtaatgctgcagtgcgagttcgattctcgccggaagcaccacca	ThrGGT	44	V-region	C	0.000318327	1.84511	46.3333	3.12524	FP type II	NaBH4
E. sibiricum	20	cluster31	gcttccgtaggttaatggcagacctcagcaatggtaatgctgcagtgcgagttcgattctcgccggaagcaccacca	ThrGGT	37	AC-loop	A	3.4725333318991e-07	1.90561	126.333	7.52886	FP type II	NaBH4
E. sibiricum	10	cluster32	ggaggcgtactcaagtggtttaagagaacggtcttgaaaaccgtcaggcggcgaaagccgtgcgtgggttcgaatcccaccgcctcctccacca	SerTGA	23e	V-region	C	9.2827792173586e-10	2.0491	169.667	2.04022	FP type II	NaBH4
E. sibiricum	10	cluster32	ggaggcgtactcaagtggtttaagagaacggtcttgaaaaccgtcaggcggcgaaagccgtgcgtgggttcgaatcccaccgcctcctccacca	SerTGA	22e	V-region	C	5.27127563885099e-05	1.18646	186.333	2.20486	FP type II	NaBH4
E. sibiricum	10	cluster33	ggaggattagctcagctgggagagcatctgccttacaagcagagggtcggcggttcgatcccgtcatcctccaccacca	ValTAC	32	AC-loop	C	3.08637425537001e-07	1.15151	358	6.8225	FP type II	NaBH4
E. sibiricum	10	cluster33	ggaggattagctcagctgggagagcatctgccttacaagcagagggtcggcggttcgatcccgtcatcctccaccacca	ValTAC	48	V-region	C	0	3.54488	656	3.5771	FP type II	NaBH4
E. sibiricum	10	cluster33	ggaggattagctcagctgggagagcatctgccttacaagcagagggtcggcggttcgatcccgtcatcctccaccacca	ValTAC	38	AC-loop	A	8.95943246927377e-08	1.51961	239.333	2.4434	FP type II	NaBH4
E. sibiricum	10	cluster33	ggaggattagctcagctgggagagcatctgccttacaagcagagggtcggcggttcgatcccgtcatcctccaccacca	ValTAC	26	after 3' D-stem	A	0.00180873	1.1735	105.333	2.51074	FP type II	NaBH4
E. sibiricum	10	cluster33	ggaggattagctcagctgggagagcatctgccttacaagcagagggtcggcggttcgatcccgtcatcctccaccacca	ValTAC	40	3' AC-stem	C	9.12553740121392e-06	1.13574	253.333	2.4622	FP type II	NaBH4
E. sibiricum	10	cluster33	ggaggattagctcagctgggagagcatctgccttacaagcagagggtcggcggttcgatcccgtcatcctccaccacca	ValTAC	23	3' D-stem	A	0.00459598	1.01694	98.3333	2.4408	FP type II	NaBH4
E. sibiricum	20	cluster33	ggaggattagctcagctgggagagcatctgccttacaagcagagggtcggcggttcgatcccgtcatcctccaccacca	ValTAC	48	V-region	C	0	3.37883	343.667	2.43402	FP type II	NaBH4
E. sibiricum	20	cluster33	ggaggattagctcagctgggagagcatctgccttacaagcagagggtcggcggttcgatcccgtcatcctccaccacca	ValTAC	32	AC-loop	C	1.37392977427749e-05	1.51309	154	2.71613	FP type II	NaBH4
E. sibiricum	20	cluster33	ggaggattagctcagctgggagagcatctgccttacaagcagagggtcggcggttcgatcccgtcatcctccaccacca	ValTAC	60	T-loop	C	0	3.7755	361.667	2.37574	FP type II	NaBH4
E. sibiricum	30	cluster33	ggaggattagctcagctgggagagcatctgccttacaagcagagggtcggcggttcgatcccgtcatcctccaccacca	ValTAC	28	5' AC-stem	C	1.22697963180105e-05	1.73921	111.333	2.04353	FP type II	NaBH4
E. sibiricum	30	cluster33	ggaggattagctcagctgggagagcatctgccttacaagcagagggtcggcggttcgatcccgtcatcctccaccacca	ValTAC	32	AC-loop	C	2.89485267419266e-07	1.60517	178	3.09502	FP type II	NaBH4
E. sibiricum	30	cluster33	ggaggattagctcagctgggagagcatctgccttacaagcagagggtcggcggttcgatcccgtcatcctccaccacca	ValTAC	60	T-loop	C	0	4.43871	604.333	3.33998	FP type II	NaBH4
E. sibiricum	30	cluster33	ggaggattagctcagctgggagagcatctgccttacaagcagagggtcggcggttcgatcccgtcatcctccaccacca	ValTAC	48	V-region	C	0	3.78691	411.333	2.47619	FP type II	NaBH4
E. sibiricum	10	cluster34	gccggtgtggcggaactggtagacgcgcacgactcaaaatcgtgttcctttggagtgtcggttcgattccgaccaccggtaccacca	LeuCAA	12e	V-region	C	0	1.64912	517.333	6.02847	FP type II	NaBH4
E. sibiricum	20	cluster34	gccggtgtggcggaactggtagacgcgcacgactcaaaatcgtgttcctttggagtgtcggttcgattccgaccaccggtaccacca	LeuCAA	12e	V-region	C	4.54204002176317e-06	1.22179	265.333	2.52742	FP type II	NaBH4
E. sibiricum	30	cluster34	gccggtgtggcggaactggtagacgcgcacgactcaaaatcgtgttcctttggagtgtcggttcgattccgaccaccggtaccacca	LeuCAA	12e	V-region	C	3.17892996884808e-06	1.28915	230.333	2.38786	FP type II	NaBH4
E. sibiricum	10	cluster35	gcacccgtagctcaggggatagagcactggtttccggtaccaggtgtcgggagttcaaatctctccgggtgtaccacca	ArgCCG	11	5' D-stem	C	0	1.12587	20	2.02606	FP type II	NaBH4
E. sibiricum	10	cluster35	gcacccgtagctcaggggatagagcactggtttccggtaccaggtgtcgggagttcaaatctctccgggtgtaccacca	ArgCCG	56	T-loop	C	0	2.80625	500.667	3.18202	FP type II	NaBH4
E. sibiricum	20	cluster35	gcacccgtagctcaggggatagagcactggtttccggtaccaggtgtcgggagttcaaatctctccgggtgtaccacca	ArgCCG	56	T-loop	C	0	4.36308	193.333	2.36401	FP type II	NaBH4
E. sibiricum	30	cluster35	gcacccgtagctcaggggatagagcactggtttccggtaccaggtgtcgggagttcaaatctctccgggtgtaccacca	ArgCCG	56	T-loop	C	0	4.67889	245.667	2.74201	FP type II	NaBH4
E. sibiricum	10	cluster36	ggggccttagctcagctgggagagcgcctgccttgcacgcaggaggtcagcggttcgatcccgctaggctccaccacca	AlaTGC	11	5' D-stem	C	2.59506122048335e-07	2.00012	131	3.14064	FP type II	NaBH4
E. sibiricum	10	cluster36	ggggccttagctcagctgggagagcgcctgccttgcacgcaggaggtcagcggttcgatcccgctaggctccaccacca	AlaTGC	48	V-region	C	0	3.44887	1073.67	4.35274	FP type II	NaBH4
E. sibiricum	10	cluster36	ggggccttagctcagctgggagagcgcctgccttgcacgcaggaggtcagcggttcgatcccgctaggctccaccacca	AlaTGC	13	5' D-stem	C	7.75691278749222e-10	1.77688	217	4.83246	FP type II	NaBH4
E. sibiricum	10	cluster36	ggggccttagctcagctgggagagcgcctgccttgcacgcaggaggtcagcggttcgatcccgctaggctccaccacca	AlaTGC	44	V-region	A	1.58298686888607e-15	2.06861	291	2.12211	FP type II	NaBH4
E. sibiricum	10	cluster36	ggggccttagctcagctgggagagcgcctgccttgcacgcaggaggtcagcggttcgatcccgctaggctccaccacca	AlaTGC	32	AC-loop	C	7.96770057339321e-16	1.67782	436.667	5.5488	FP type II	NaBH4
E. sibiricum	30	cluster36	ggggccttagctcagctgggagagcgcctgccttgcacgcaggaggtcagcggttcgatcccgctaggctccaccacca	AlaTGC	32	AC-loop	C	4.69324354107516e-08	1.5116	253.667	2.45985	FP type II	NaBH4
E. sibiricum	10	cluster37	gattctgtagctcagctgggagagcgctaccttgacagggtagaggtcgctggttcgagcccagtcagaatcaccacca	ValGAC	48	V-region	C	0	2.73234	581	2.87907	FP type II	NaBH4
E. sibiricum	10	cluster37	gattctgtagctcagctgggagagcgctaccttgacagggtagaggtcgctggttcgagcccagtcagaatcaccacca	ValGAC	27	5' AC-stem	C	3.65297685897376e-05	1.34637	174	2.49734	FP type II	NaBH4
E. sibiricum	10	cluster37	gattctgtagctcagctgggagagcgctaccttgacagggtagaggtcgctggttcgagcccagtcagaatcaccacca	ValGAC	42	3' AC-stem	A	0	2.80251	270	2.54066	FP type II	NaBH4
E. sibiricum	10	cluster37	gattctgtagctcagctgggagagcgctaccttgacagggtagaggtcgctggttcgagcccagtcagaatcaccacca	ValGAC	13	5' D-stem	C	7.1722637275642e-05	1.04172	232.667	6.80624	FP type II	NaBH4
E. sibiricum	20	cluster37	gattctgtagctcagctgggagagcgctaccttgacagggtagaggtcgctggttcgagcccagtcagaatcaccacca	ValGAC	48	V-region	C	0	3.49581	434.333	2.13148	FP type II	NaBH4
E. sibiricum	20	cluster37	gattctgtagctcagctgggagagcgctaccttgacagggtagaggtcgctggttcgagcccagtcagaatcaccacca	ValGAC	42	3' AC-stem	A	0	3.70596	272	3.01851	FP type II	NaBH4
E. sibiricum	20	cluster37	gattctgtagctcagctgggagagcgctaccttgacagggtagaggtcgctggttcgagcccagtcagaatcaccacca	ValGAC	37	AC-loop	A	4.55244577855197e-05	1.27865	198	2.37167	FP type II	NaBH4
E. sibiricum	30	cluster37	gattctgtagctcagctgggagagcgctaccttgacagggtagaggtcgctggttcgagcccagtcagaatcaccacca	ValGAC	48	V-region	C	0	3.83171	541.333	2.07799	FP type II	NaBH4
E. sibiricum	30	cluster37	gattctgtagctcagctgggagagcgctaccttgacagggtagaggtcgctggttcgagcccagtcagaatcaccacca	ValGAC	42	3' AC-stem	A	0	3.85153	297.333	2.96155	FP type II	NaBH4
E. sibiricum	30	cluster37	gattctgtagctcagctgggagagcgctaccttgacagggtagaggtcgctggttcgagcccagtcagaatcaccacca	ValGAC	37	AC-loop	A	3.79009207478506e-05	1.1374	218	2.4392	FP type II	NaBH4
E. sibiricum	10	cluster38	ggcgccatagccaagtggtaaggcagaggactgcaactcctctatcgtcagttcgattctgactggcgcctccacca	CysGCA	45	V-region	A	0.00900444	1.05191	77.3333	2.46962	FP type II	NaBH4
E. sibiricum	10	cluster38	ggcgccatagccaagtggtaaggcagaggactgcaactcctctatcgtcagttcgattctgactggcgcctccacca	CysGCA	14	D-loop	A	0.000183689	1.58539	68.6667	9.20629	FP type II	NaBH4
E. sibiricum	10	cluster38	ggcgccatagccaagtggtaaggcagaggactgcaactcctctatcgtcagttcgattctgactggcgcctccacca	CysGCA	48	V-region	C	2.04172630040016e-05	1.21507	195	5.80324	FP type II	NaBH4
E. sibiricum	10	cluster38	ggcgccatagccaagtggtaaggcagaggactgcaactcctctatcgtcagttcgattctgactggcgcctccacca	CysGCA	41	3' AC-stem	C	0.00365741	1.12234	64.6667	2.31072	FP type II	NaBH4
E. sibiricum	10	cluster38	ggcgccatagccaagtggtaaggcagaggactgcaactcctctatcgtcagttcgattctgactggcgcctccacca	CysGCA	21	D-loop	A	5.34689215272105e-06	1.46743	171.333	12.3418	FP type II	NaBH4
E. sibiricum	10	cluster38	ggcgccatagccaagtggtaaggcagaggactgcaactcctctatcgtcagttcgattctgactggcgcctccacca	CysGCA	43	3' AC-stem	C	0.00459598	1.03507	99.6667	3.42314	FP type II	NaBH4
E. sibiricum	10	cluster38	ggcgccatagccaagtggtaaggcagaggactgcaactcctctatcgtcagttcgattctgactggcgcctccacca	CysGCA	51	5' T-stem	C	3.45697752499813e-11	2.07481	184.667	4.85629	FP type II	NaBH4
E. sibiricum	20	cluster38	ggcgccatagccaagtggtaaggcagaggactgcaactcctctatcgtcagttcgattctgactggcgcctccacca	CysGCA	22	3' D-stem	A	4.55244577855197e-05	1.21525	201.667	5.17692	FP type II	NaBH4
E. sibiricum	20	cluster38	ggcgccatagccaagtggtaaggcagaggactgcaactcctctatcgtcagttcgattctgactggcgcctccacca	CysGCA	21	D-loop	A	6.41320498390331e-13	2.13823	259.667	7.43654	FP type II	NaBH4
E. sibiricum	20	cluster38	ggcgccatagccaagtggtaaggcagaggactgcaactcctctatcgtcagttcgattctgactggcgcctccacca	CysGCA	14	D-loop	A	3.4870627197592e-15	3.13969	137	5.89648	FP type II	NaBH4
E. sibiricum	30	cluster38	ggcgccatagccaagtggtaaggcagaggactgcaactcctctatcgtcagttcgattctgactggcgcctccacca	CysGCA	22	3' D-stem	A	3.17892996884808e-06	1.26065	230.333	6.3237	FP type II	NaBH4
E. sibiricum	30	cluster38	ggcgccatagccaagtggtaaggcagaggactgcaactcctctatcgtcagttcgattctgactggcgcctccacca	CysGCA	14	D-loop	A	0	3.32628	126.333	6.75455	FP type II	NaBH4
E. sibiricum	30	cluster38	ggcgccatagccaagtggtaaggcagaggactgcaactcctctatcgtcagttcgattctgactggcgcctccacca	CysGCA	48	V-region	C	0.000401813	1.15818	118	2.53499	FP type II	NaBH4
E. sibiricum	30	cluster38	ggcgccatagccaagtggtaaggcagaggactgcaactcctctatcgtcagttcgattctgactggcgcctccacca	CysGCA	21	D-loop	A	0	2.50364	340.333	10.0532	FP type II	NaBH4
E. sibiricum	10	cluster39	gcgggtgtagtttagtggtaaaacctcagccttccaagctgatgatgagggttcgattcccttcacccgctccacca	GlyTCC-2	46	V-region	A	5.34689215272105e-06	1.54213	167.667	2.83114	FP type II	NaBH4
E. sibiricum	10	cluster39	gcgggtgtagtttagtggtaaaacctcagccttccaagctgatgatgagggttcgattcccttcacccgctccacca	GlyTCC-2	43	3' AC-stem	A	4.4679087838762e-09	1.97715	159.333	2.88943	FP type II	NaBH4
E. sibiricum	10	cluster4	ggcccgttggtcaagcggttaagacaccgccctttcacggcggtatcacgggttcgattcccgtacgggtcaccacca	GluTTC-2	21	D-loop	A	0	2.86981	6032.67	19.3495	FP type II	NaBH4
E. sibiricum	20	cluster4	ggcccgttggtcaagcggttaagacaccgccctttcacggcggtatcacgggttcgattcccgtacgggtcaccacca	GluTTC-2	21	D-loop	A	0	3.07384	9569	26.681	FP type II	NaBH4
E. sibiricum	30	cluster4	ggcccgttggtcaagcggttaagacaccgccctttcacggcggtatcacgggttcgattcccgtacgggtcaccacca	GluTTC-2	21	D-loop	A	0	3.07085	7597.67	25.8167	FP type II	NaBH4
E. sibiricum	10	cluster5	gcgggtgtagtttagtggtaaaacctcagccttccaagctgatgatgagagttcgattctcttcacccgctccacca	GlyTCC-1	46	V-region	A	1.87856800163464e-08	1.23719	349	4.09477	FP type II	NaBH4
E. sibiricum	30	cluster5	gcgggtgtagtttagtggtaaaacctcagccttccaagctgatgatgagagttcgattctcttcacccgctccacca	GlyTCC-1	58	T-loop	A	0	5.11431	284.667	2.70715	FP type II	NaBH4
E. sibiricum	10	cluster7	ggcggtgtagctcagctggctagagcgtacggttcatacccgtgaggtcgtgggttcgactccctccgccgctaccacca	MetCAT-1	34	AC-loop	C	0	3.03996	1730	54.5516	FP type II	NaBH4
E. sibiricum	20	cluster7	ggcggtgtagctcagctggctagagcgtacggttcatacccgtgaggtcgtgggttcgactccctccgccgctaccacca	MetCAT-1	34	AC-loop	C	0	4.49913	1086.67	45.5903	FP type II	NaBH4
E. sibiricum	30	cluster7	ggcggtgtagctcagctggctagagcgtacggttcatacccgtgaggtcgtgggttcgactccctccgccgctaccacca	MetCAT-1	34	AC-loop	C	0	5.12088	1078	48.8369	FP type II	NaBH4
E. sibiricum	10	cluster8	gggggcttagctcagctgggagagcgtttggctggcagccaaaaggtcgtcggttcgagcccgatagtctccaccacca	AlaGGC	48	V-region	C	0.00652641	1.2118	85.6667	2.27101	FP type II	NaBH4
E. sibiricum	10	cluster8	gggggcttagctcagctgggagagcgtttggctggcagccaaaaggtcgtcggttcgagcccgatagtctccaccacca	AlaGGC	51	5' T-stem	C	0.00652641	1.13574	87.6667	2.20133	FP type II	NaBH4
E. sibiricum	10	cluster8	gggggcttagctcagctgggagagcgtttggctggcagccaaaaggtcgtcggttcgagcccgatagtctccaccacca	AlaGGC	39	3' AC-stem	C	6.49967914832938e-06	1.5708	138	7.29591	FP type II	NaBH4
E. sibiricum	20	cluster8	gggggcttagctcagctgggagagcgtttggctggcagccaaaaggtcgtcggttcgagcccgatagtctccaccacca	AlaGGC	39	3' AC-stem	C	0.000701125	1.32274	83.3333	12.0527	FP type II	NaBH4
E. sibiricum	30	cluster8	gggggcttagctcagctgggagagcgtttggctggcagccaaaaggtcgtcggttcgagcccgatagtctccaccacca	AlaGGC	61	3' T-stem	C	0	3.7474	97	5.75682	FP type II	NaBH4
E. sibiricum	30	cluster8	gggggcttagctcagctgggagagcgtttggctggcagccaaaaggtcgtcggttcgagcccgatagtctccaccacca	AlaGGC	39	3' AC-stem	C	0.000110999	1.98428	74.3333	14.5731	FP type II	NaBH4
E. sibiricum	10	cluster9	cgcggggtggagcagtctggtagctcgttgggctcataacccaaaggtcgtcggttcaaatccggcccccgcaaccacca	MetCAT-2	32	AC-loop	C	7.53981535507616e-07	1.40987	226.333	2.30436	FP type II	NaBH4
E. sibiricum	10	cluster9	cgcggggtggagcagtctggtagctcgttgggctcataacccaaaggtcgtcggttcaaatccggcccccgcaaccacca	MetCAT-2	13	5' D-stem	C	0.000357443	1.27783	146.333	3.10308	FP type II	NaBH4
E. sibiricum	10	cluster9	cgcggggtggagcagtctggtagctcgttgggctcataacccaaaggtcgtcggttcaaatccggcccccgcaaccacca	MetCAT-2	56	T-loop	C	0	3.13322	830.667	5.24972	FP type II	NaBH4
E. sibiricum	10	cluster9	cgcggggtggagcagtctggtagctcgttgggctcataacccaaaggtcgtcggttcaaatccggcccccgcaaccacca	MetCAT-2	41	3' AC-stem	C	6.1525735196912e-12	1.69324	327.333	2.66503	FP type II	NaBH4
E. sibiricum	10	cluster9	cgcggggtggagcagtctggtagctcgttgggctcataacccaaaggtcgtcggttcaaatccggcccccgcaaccacca	MetCAT-2	35	AC-loop	A	8.45747981452238e-12	1.41851	445	4.05235	FP type II	NaBH4
E. sibiricum	30	cluster9	cgcggggtggagcagtctggtagctcgttgggctcataacccaaaggtcgtcggttcaaatccggcccccgcaaccacca	MetCAT-2	56	T-loop	C	0	3.90649	388.333	2.38407	FP type II	NaBH4
E. sibiricum	10	cluster1	gcggaagtagttcagtggtagaatacgaccttgccaaggtcggggtcgcgggttcgaatcccgtcttccgctccacca	GlyGCC	40	3' AC-stem	G	1.57748824291816e-05	1.0947	290	3.82903	FP type I	NaBH4
E. sibiricum	10	cluster1	gcggaagtagttcagtggtagaatacgaccttgccaaggtcggggtcgcgggttcgaatcccgtcttccgctccacca	GlyGCC	45	V-region	G	0	3.95584	945.667	10.5827	FP type I	NaBH4
E. sibiricum	20	cluster1	gcggaagtagttcagtggtagaatacgaccttgccaaggtcggggtcgcgggttcgaatcccgtcttccgctccacca	GlyGCC	40	3' AC-stem	G	5.26221558086455e-09	1.87165	216.333	3.74093	FP type I	NaBH4
E. sibiricum	20	cluster1	gcggaagtagttcagtggtagaatacgaccttgccaaggtcggggtcgcgggttcgaatcccgtcttccgctccacca	GlyGCC	45	V-region	G	0	4.64993	742	10.578	FP type I	NaBH4
E. sibiricum	20	cluster1	gcggaagtagttcagtggtagaatacgaccttgccaaggtcggggtcgcgggttcgaatcccgtcttccgctccacca	GlyGCC	43	3' AC-stem	G	0.00121668	1.23273	128	2.05119	FP type I	NaBH4
E. sibiricum	30	cluster1	gcggaagtagttcagtggtagaatacgaccttgccaaggtcggggtcgcgggttcgaatcccgtcttccgctccacca	GlyGCC	40	3' AC-stem	G	0	2.35874	313	4.53954	FP type I	NaBH4
E. sibiricum	30	cluster1	gcggaagtagttcagtggtagaatacgaccttgccaaggtcggggtcgcgggttcgaatcccgtcttccgctccacca	GlyGCC	43	3' AC-stem	G	9.35407687502051e-06	1.40091	173.667	2.36809	FP type I	NaBH4
E. sibiricum	30	cluster1	gcggaagtagttcagtggtagaatacgaccttgccaaggtcggggtcgcgggttcgaatcccgtcttccgctccacca	GlyGCC	45	V-region	G	0	5.11508	1041.67	12.224	FP type I	NaBH4
E. sibiricum	10	cluster11	gggcctatagctcagctggttagagcgcacgcctgataagcgtgaggtcggtggttcgagtccacttaggcccaccacca	IleGAT	45	V-region	G	0	5.63578	1349	4.16771	FP type I	NaBH4
E. sibiricum	20	cluster11	gggcctatagctcagctggttagagcgcacgcctgataagcgtgaggtcggtggttcgagtccacttaggcccaccacca	IleGAT	45	V-region	G	0	5.60947	2145	3.86102	FP type I	NaBH4
E. sibiricum	30	cluster11	gggcctatagctcagctggttagagcgcacgcctgataagcgtgaggtcggtggttcgagtccacttaggcccaccacca	IleGAT	45	V-region	G	0	5.57845	1910.33	4.25491	FP type I	NaBH4
E. sibiricum	10	cluster12	gccggggtggcggaactggtagacgcacaggacttaaaatcctgcgggggtttccccgtgccggttcgattccggccctcggtaccacca	LeuTAA	14e	V-region	G	0.000103476	1.07929	209.333	3.00881	FP type I	NaBH4
E. sibiricum	10	cluster12	gccggggtggcggaactggtagacgcacaggacttaaaatcctgcgggggtttccccgtgccggttcgattccggccctcggtaccacca	LeuTAA	4e	V-region	T	2.04172630040016e-05	1.21047	190	2.58305	FP type I	NaBH4
E. sibiricum	20	cluster12	gccggggtggcggaactggtagacgcacaggacttaaaatcctgcgggggtttccccgtgccggttcgattccggccctcggtaccacca	LeuTAA	34	AC-loop	T	0	1.55649	1442.67	26.5662	FP type I	NaBH4
E. sibiricum	20	cluster12	gccggggtggcggaactggtagacgcacaggacttaaaatcctgcgggggtttccccgtgccggttcgattccggccctcggtaccacca	LeuTAA	12	5' D-stem	G	0	2.38231	49	8.65572	FP type I	NaBH4
E. sibiricum	30	cluster12	gccggggtggcggaactggtagacgcacaggacttaaaatcctgcgggggtttccccgtgccggttcgattccggccctcggtaccacca	LeuTAA	34	AC-loop	T	0	2.11967	2123.67	35.926	FP type I	NaBH4
E. sibiricum	30	cluster12	gccggggtggcggaactggtagacgcacaggacttaaaatcctgcgggggtttccccgtgccggttcgattccggccctcggtaccacca	LeuTAA	18	D-loop	G	0	1.79638	36.6667	2.12714	FP type I	NaBH4
E. sibiricum	30	cluster12	gccggggtggcggaactggtagacgcacaggacttaaaatcctgcgggggtttccccgtgccggttcgattccggccctcggtaccacca	LeuTAA	33	AC-loop	T	0.000179131	1.63981	100.667	2.67129	FP type I	NaBH4
E. sibiricum	30	cluster12	gccggggtggcggaactggtagacgcacaggacttaaaatcctgcgggggtttccccgtgccggttcgattccggccctcggtaccacca	LeuTAA	12	5' D-stem	G	0	2.55477	50	24.5752	FP type I	NaBH4
E. sibiricum	30	cluster13	aggggcatagtttagcggtagaactacggtctccaaaaccgtcagcgcgggttcgattcctgctgcccctgccacca	TrpCCA	57	T-loop	G	0	3.06378	77.3333	2.00887	FP type I	NaBH4
E. sibiricum	30	cluster13	aggggcatagtttagcggtagaactacggtctccaaaaccgtcagcgcgggttcgattcctgctgcccctgccacca	TrpCCA	59	T-loop	T	2.33568310784004e-09	2.7277	84	2.04746	FP type I	NaBH4
E. sibiricum	30	cluster13	aggggcatagtttagcggtagaactacggtctccaaaaccgtcagcgcgggttcgattcctgctgcccctgccacca	TrpCCA	60	T-loop	T	0	3.69204	105.667	2.53271	FP type I	NaBH4
E. sibiricum	10	cluster15	gcacccttagctcagctggatagagtacttgactacgaatcaaggggtcgggagttcgaatctctcagggtgcaccacca	ArgACG	51	5' T-stem	G	8.03326432534862e-08	1.23763	360.667	3.07266	FP type I	NaBH4
E. sibiricum	10	cluster15	gcacccttagctcagctggatagagtacttgactacgaatcaaggggtcgggagttcgaatctctcagggtgcaccacca	ArgACG	45	V-region	G	0	2.87067	472.667	6.17882	FP type I	NaBH4
E. sibiricum	20	cluster15	gcacccttagctcagctggatagagtacttgactacgaatcaaggggtcgggagttcgaatctctcagggtgcaccacca	ArgACG	51	5' T-stem	G	7.70986147633863e-12	2.03583	227.667	2.10045	FP type I	NaBH4
E. sibiricum	20	cluster15	gcacccttagctcagctggatagagtacttgactacgaatcaaggggtcgggagttcgaatctctcagggtgcaccacca	ArgACG	45	V-region	G	0	2.65907	497	8.01773	FP type I	NaBH4
E. sibiricum	30	cluster15	gcacccttagctcagctggatagagtacttgactacgaatcaaggggtcgggagttcgaatctctcagggtgcaccacca	ArgACG	45	V-region	G	0	3.28335	663.333	9.33229	FP type I	NaBH4
E. sibiricum	20	cluster16	ggcccgttggtcaagcggttaagacaccgccctttcacggcggtaacacgggttcgattcccgtacgggtcaccacca	GluTTC-1	33	AC-loop	T	0	2.19886	1702	3.73709	FP type I	NaBH4
E. sibiricum	20	cluster16	ggcccgttggtcaagcggttaagacaccgccctttcacggcggtaacacgggttcgattcccgtacgggtcaccacca	GluTTC-1	35	AC-loop	T	0	1.3591	1756	3.46655	FP type I	NaBH4
E. sibiricum	20	cluster16	ggcccgttggtcaagcggttaagacaccgccctttcacggcggtaacacgggttcgattcccgtacgggtcaccacca	GluTTC-1	34	AC-loop	T	0	1.43478	2983.67	6.13901	FP type I	NaBH4
E. sibiricum	30	cluster16	ggcccgttggtcaagcggttaagacaccgccctttcacggcggtaacacgggttcgattcccgtacgggtcaccacca	GluTTC-1	33	AC-loop	T	0	1.29942	1425.33	4.12598	FP type I	NaBH4
E. sibiricum	20	cluster17	tgggctgtggccaagtggtaaggcactggattttgattccagcatgcgaaggttcgatcccttccagcccagccacca	GlnTTG	7	5' ACC-stem	G	0	3.10654	577.333	8.13974	FP type I	NaBH4
E. sibiricum	20	cluster17	tgggctgtggccaagtggtaaggcactggattttgattccagcatgcgaaggttcgatcccttccagcccagccacca	GlnTTG	6	5' ACC-stem	T	1.91492022307642e-14	2.68272	160.667	2.45713	FP type I	NaBH4
E. sibiricum	20	cluster17	tgggctgtggccaagtggtaaggcactggattttgattccagcatgcgaaggttcgatcccttccagcccagccacca	GlnTTG	19	D-loop	G	0	1.79995	1874	18.1631	FP type I	NaBH4
E. sibiricum	30	cluster17	tgggctgtggccaagtggtaaggcactggattttgattccagcatgcgaaggttcgatcccttccagcccagccacca	GlnTTG	7	5' ACC-stem	G	0	2.98919	410.667	8.22506	FP type I	NaBH4
E. sibiricum	30	cluster17	tgggctgtggccaagtggtaaggcactggattttgattccagcatgcgaaggttcgatcccttccagcccagccacca	GlnTTG	19	D-loop	G	0	2.01747	1365	18.7186	FP type I	NaBH4
E. sibiricum	30	cluster17	tgggctgtggccaagtggtaaggcactggattttgattccagcatgcgaaggttcgatcccttccagcccagccacca	GlnTTG	6	5' ACC-stem	T	1.80139367110183e-11	2.64604	130.667	2.91307	FP type I	NaBH4
E. sibiricum	10	cluster18	ggacccttagctcagctggttagagctgacggctcataaccgtccggtcgcaggttcgagtcctgcagggtccaccacca	MetCAT-3	45	V-region	G	2.80437802343006e-11	2.93151	92.3333	2.24476	FP type I	NaBH4
E. sibiricum	10	cluster18	ggacccttagctcagctggttagagctgacggctcataaccgtccggtcgcaggttcgagtcctgcagggtccaccacca	MetCAT-3	36	AC-loop	T	6.13364600936444e-06	1.58937	153.667	3.98167	FP type I	NaBH4
E. sibiricum	20	cluster18	ggacccttagctcagctggttagagctgacggctcataaccgtccggtcgcaggttcgagtcctgcagggtccaccacca	MetCAT-3	36	AC-loop	T	3.75699474643259e-06	1.73106	148	2.3488	FP type I	NaBH4
E. sibiricum	30	cluster18	ggacccttagctcagctggttagagctgacggctcataaccgtccggtcgcaggttcgagtcctgcagggtccaccacca	MetCAT-3	36	AC-loop	T	4.80760649004346e-05	1.48699	105.667	2.084	FP type I	NaBH4
E. sibiricum	20	cluster2	gcgggtgtggcggaattggtagacgcgctagatttaggatctagtgtctttgacgtgggggttcaagtcccttcacccgtaccacca	LeuTAG	53	5' T-stem	G	0	3.54917	162.667	2.15126	FP type I	NaBH4
E. sibiricum	30	cluster2	gcgggtgtggcggaattggtagacgcgctagatttaggatctagtgtctttgacgtgggggttcaagtcccttcacccgtaccacca	LeuTAG	53	5' T-stem	G	0	3.13709	259	2.23967	FP type I	NaBH4
E. sibiricum	10	cluster20	ggctttgtagctcagtcggtagagcagaggactgaaaatcctcgtgtcggcggttcgattccgtccaaagccaccacca	PheGAA	42	3' AC-stem	T	1.07157028261122e-09	1.04024	631.333	4.55357	FP type I	NaBH4
E. sibiricum	10	cluster20	ggctttgtagctcagtcggtagagcagaggactgaaaatcctcgtgtcggcggttcgattccgtccaaagccaccacca	PheGAA	45	V-region	T	0	1.7771	1119.67	6.73829	FP type I	NaBH4
E. sibiricum	10	cluster20	ggctttgtagctcagtcggtagagcagaggactgaaaatcctcgtgtcggcggttcgattccgtccaaagccaccacca	PheGAA	18	D-loop	G	0.000262556	1.22054	157.333	2.50002	FP type I	NaBH4
E. sibiricum	20	cluster20	ggctttgtagctcagtcggtagagcagaggactgaaaatcctcgtgtcggcggttcgattccgtccaaagccaccacca	PheGAA	42	3' AC-stem	T	0	4.40649	1212	5.47981	FP type I	NaBH4
E. sibiricum	20	cluster20	ggctttgtagctcagtcggtagagcagaggactgaaaatcctcgtgtcggcggttcgattccgtccaaagccaccacca	PheGAA	45	V-region	T	0	2.39682	2207.67	7.87855	FP type I	NaBH4
E. sibiricum	20	cluster20	ggctttgtagctcagtcggtagagcagaggactgaaaatcctcgtgtcggcggttcgattccgtccaaagccaccacca	PheGAA	44	V-region	G	0	1.34467	1799	7.10595	FP type I	NaBH4
E. sibiricum	30	cluster20	ggctttgtagctcagtcggtagagcagaggactgaaaatcctcgtgtcggcggttcgattccgtccaaagccaccacca	PheGAA	42	3' AC-stem	T	0	4.30008	781.667	5.8073	FP type I	NaBH4
E. sibiricum	30	cluster20	ggctttgtagctcagtcggtagagcagaggactgaaaatcctcgtgtcggcggttcgattccgtccaaagccaccacca	PheGAA	45	V-region	T	0	2.61248	1484	8.70365	FP type I	NaBH4
E. sibiricum	30	cluster20	ggctttgtagctcagtcggtagagcagaggactgaaaatcctcgtgtcggcggttcgattccgtccaaagccaccacca	PheGAA	44	V-region	G	0	1.59558	1159.33	7.46555	FP type I	NaBH4
E. sibiricum	10	cluster21	cgggaagtagctcagcttggtagagcacttggtttgggaccaaggggtcgcaggttcgaatcctgtcttcccgaccacca	ProTGG	45	V-region	G	0	5.5188	1157	2.7413	FP type I	NaBH4
E. sibiricum	20	cluster21	cgggaagtagctcagcttggtagagcacttggtttgggaccaaggggtcgcaggttcgaatcctgtcttcccgaccacca	ProTGG	45	V-region	G	0	5.50551	1117.67	3.62606	FP type I	NaBH4
E. sibiricum	30	cluster21	cgggaagtagctcagcttggtagagcacttggtttgggaccaaggggtcgcaggttcgaatcctgtcttcccgaccacca	ProTGG	45	V-region	G	0	5.79897	827	3.73401	FP type I	NaBH4
E. sibiricum	10	cluster22	gtctcaatagctcagctggatagagcaacgcccttctaaggcgtcggtcgggggttcgaatccctcttgggacaccacca	ArgTCT	45	V-region	G	1.92720566826146e-08	2.29521	125.333	6.96643	FP type I	NaBH4
E. sibiricum	20	cluster22	gtctcaatagctcagctggatagagcaacgcccttctaaggcgtcggtcgggggttcgaatccctcttgggacaccacca	ArgTCT	45	V-region	G	1.665398731561e-10	2.74722	136.333	7.93978	FP type I	NaBH4
E. sibiricum	30	cluster22	gtctcaatagctcagctggatagagcaacgcccttctaaggcgtcggtcgggggttcgaatccctcttgggacaccacca	ArgTCT	45	V-region	G	0	3.26777	140.333	8.20541	FP type I	NaBH4
E. sibiricum	30	cluster22	gtctcaatagctcagctggatagagcaacgcccttctaaggcgtcggtcgggggttcgaatccctcttgggacaccacca	ArgTCT	34	AC-loop	T	7.85838675953306e-05	1.11383	190.333	14.7202	FP type I	NaBH4
E. sibiricum	20	cluster23	ggagatgtacccaagtggctataaggggcgcccctgctaagggtgtaggccgggaaactggtgcgagggttcgaatccctccatctccgccacca	SerGCT	53	5' T-stem	G	0	1.50176	29.6667	2.62135	FP type I	NaBH4
E. sibiricum	20	cluster23	ggagatgtacccaagtggctataaggggcgcccctgctaagggtgtaggccgggaaactggtgcgagggttcgaatccctccatctccgccacca	SerGCT	57	T-loop	G	0	2.17104	38.6667	2.93298	FP type I	NaBH4
E. sibiricum	30	cluster23	ggagatgtacccaagtggctataaggggcgcccctgctaagggtgtaggccgggaaactggtgcgagggttcgaatccctccatctccgccacca	SerGCT	57	T-loop	G	0	2.54795	42.6667	4.6597	FP type I	NaBH4
E. sibiricum	30	cluster23	ggagatgtacccaagtggctataaggggcgcccctgctaagggtgtaggccgggaaactggtgcgagggttcgaatccctccatctccgccacca	SerGCT	60	T-loop	T	0	1.58281	22	2.27915	FP type I	NaBH4
E. sibiricum	10	cluster24	ggagagctgtccgagtggccgaaggagcacgattggaaatcgtgtaggcgtcataagcgtctcaagggttcgaatcccttgctctccgccacca	SerGGA	57	T-loop	G	0	1.9261	31.3333	2.02573	FP type I	NaBH4
E. sibiricum	20	cluster24	ggagagctgtccgagtggccgaaggagcacgattggaaatcgtgtaggcgtcataagcgtctcaagggttcgaatcccttgctctccgccacca	SerGGA	57	T-loop	G	0	1.50192	24.6667	4.24413	FP type I	NaBH4
E. sibiricum	30	cluster24	ggagagctgtccgagtggccgaaggagcacgattggaaatcgtgtaggcgtcataagcgtctcaagggttcgaatcccttgctctccgccacca	SerGGA	57	T-loop	G	0	2.55219	44	5.25802	FP type I	NaBH4
E. sibiricum	30	cluster24	ggagagctgtccgagtggccgaaggagcacgattggaaatcgtgtaggcgtcataagcgtctcaagggttcgaatcccttgctctccgccacca	SerGGA	60	T-loop	T	0	2.64667	44.3333	4.94568	FP type I	NaBH4
E. sibiricum	10	cluster26	gtgtcattagctcagttggtagagcatctgacttttaatcagagggtcgcaggttcgaatcctgcatgacacaccacca	LysTTT-1	18	D-loop	G	7.21646316723243e-05	1.43756	131.667	3.52113	FP type I	NaBH4
E. sibiricum	10	cluster26	gtgtcattagctcagttggtagagcatctgacttttaatcagagggtcgcaggttcgaatcctgcatgacacaccacca	LysTTT-1	29	5' AC-stem	T	2.22612848730816e-05	1.55709	137.333	2.27174	FP type I	NaBH4
E. sibiricum	10	cluster26	gtgtcattagctcagttggtagagcatctgacttttaatcagagggtcgcaggttcgaatcctgcatgacacaccacca	LysTTT-1	22	3' D-stem	G	2.1194750261448e-05	1.72727	108.667	2.12587	FP type I	NaBH4
E. sibiricum	10	cluster26	gtgtcattagctcagttggtagagcatctgacttttaatcagagggtcgcaggttcgaatcctgcatgacacaccacca	LysTTT-1	42	3' AC-stem	G	0	5.62591	3001.67	8.86242	FP type I	NaBH4
E. sibiricum	10	cluster26	gtgtcattagctcagttggtagagcatctgacttttaatcagagggtcgcaggttcgaatcctgcatgacacaccacca	LysTTT-1	45	V-region	G	0	4.5231	763.667	2.18237	FP type I	NaBH4
E. sibiricum	20	cluster26	gtgtcattagctcagttggtagagcatctgacttttaatcagagggtcgcaggttcgaatcctgcatgacacaccacca	LysTTT-1	33	AC-loop	T	0	1.13632	1183.33	22.9203	FP type I	NaBH4
E. sibiricum	20	cluster26	gtgtcattagctcagttggtagagcatctgacttttaatcagagggtcgcaggttcgaatcctgcatgacacaccacca	LysTTT-1	42	3' AC-stem	G	0	7.4187	7046.67	11.5933	FP type I	NaBH4
E. sibiricum	30	cluster26	gtgtcattagctcagttggtagagcatctgacttttaatcagagggtcgcaggttcgaatcctgcatgacacaccacca	LysTTT-1	33	AC-loop	T	0	1.04657	1167	24.4018	FP type I	NaBH4
E. sibiricum	30	cluster26	gtgtcattagctcagttggtagagcatctgacttttaatcagagggtcgcaggttcgaatcctgcatgacacaccacca	LysTTT-1	42	3' AC-stem	G	0	7.01104	4330	10.0237	FP type I	NaBH4
E. sibiricum	10	cluster27	gccggtgtagctcagctggtagagcaactgacttgtaatcagtaggtcgcgggttcgactcctgttgccggcaccacca	ThrTGT	35	AC-loop	G	5.10590443373918e-10	1.04922	625.333	12.7729	FP type I	NaBH4
E. sibiricum	10	cluster27	gccggtgtagctcagctggtagagcaactgacttgtaatcagtaggtcgcgggttcgactcctgttgccggcaccacca	ThrTGT	45	V-region	G	0	3.87742	336.333	4.63597	FP type I	NaBH4
E. sibiricum	10	cluster27	gccggtgtagctcagctggtagagcaactgacttgtaatcagtaggtcgcgggttcgactcctgttgccggcaccacca	ThrTGT	18	D-loop	G	6.49967914832938e-06	1.59662	144.667	5.69789	FP type I	NaBH4
E. sibiricum	20	cluster27	gccggtgtagctcagctggtagagcaactgacttgtaatcagtaggtcgcgggttcgactcctgttgccggcaccacca	ThrTGT	45	V-region	G	0	3.22194	284	5.35181	FP type I	NaBH4
E. sibiricum	20	cluster27	gccggtgtagctcagctggtagagcaactgacttgtaatcagtaggtcgcgggttcgactcctgttgccggcaccacca	ThrTGT	18	D-loop	G	0.0082088	1.3207	68.6667	2.19379	FP type I	NaBH4
E. sibiricum	30	cluster27	gccggtgtagctcagctggtagagcaactgacttgtaatcagtaggtcgcgggttcgactcctgttgccggcaccacca	ThrTGT	45	V-region	G	0	3.67946	567.667	6.03416	FP type I	NaBH4
E. sibiricum	30	cluster27	gccggtgtagctcagctggtagagcaactgacttgtaatcagtaggtcgcgggttcgactcctgttgccggcaccacca	ThrTGT	18	D-loop	G	9.01535219587911e-07	1.6025	139.667	2.63558	FP type I	NaBH4
E. sibiricum	10	cluster28	gggggggtagcgaagtggctaaacgcggcggactgtaaatccgctccctcgggttcggcggttcgaatccgcccccccccaccacca	TyrGTA	46	V-region	T	0	2.11716	323	4.98382	FP type I	NaBH4
E. sibiricum	10	cluster28	gggggggtagcgaagtggctaaacgcggcggactgtaaatccgctccctcgggttcggcggttcgaatccgcccccccccaccacca	TyrGTA	4e	V-region	G	0.00013394	1.29505	143.333	2.45509	FP type I	NaBH4
E. sibiricum	10	cluster28	gggggggtagcgaagtggctaaacgcggcggactgtaaatccgctccctcgggttcggcggttcgaatccgcccccccccaccacca	TyrGTA	21e	V-region	G	0	2.33919	247.667	4.04006	FP type I	NaBH4
E. sibiricum	20	cluster28	gggggggtagcgaagtggctaaacgcggcggactgtaaatccgctccctcgggttcggcggttcgaatccgcccccccccaccacca	TyrGTA	46	V-region	T	0.000204228	1.65725	54.3333	2.42449	FP type I	NaBH4
E. sibiricum	20	cluster28	gggggggtagcgaagtggctaaacgcggcggactgtaaatccgctccctcgggttcggcggttcgaatccgcccccccccaccacca	TyrGTA	35	AC-loop	T	0.00212715	1.22937	88.3333	4.90557	FP type I	NaBH4
E. sibiricum	30	cluster28	gggggggtagcgaagtggctaaacgcggcggactgtaaatccgctccctcgggttcggcggttcgaatccgcccccccccaccacca	TyrGTA	46	V-region	T	2.74797180717637e-08	2.31489	81.6667	2.69577	FP type I	NaBH4
E. sibiricum	30	cluster28	gggggggtagcgaagtggctaaacgcggcggactgtaaatccgctccctcgggttcggcggttcgaatccgcccccccccaccacca	TyrGTA	35	AC-loop	T	0.00016361	1.45042	115.333	4.74617	FP type I	NaBH4
E. sibiricum	30	cluster28	gggggggtagcgaagtggctaaacgcggcggactgtaaatccgctccctcgggttcggcggttcgaatccgcccccccccaccacca	TyrGTA	21e	V-region	G	0.00234927	1.53216	59	2.01548	FP type I	NaBH4
E. sibiricum	10	cluster29	gcggtcgtggcggaatggtagacgcgctaggttgagggcctagtggtggcaacactgtggaggttcaagtcctctcgaccgcaccacca	LeuGAG	41	3' AC-stem	T	0	2.24828	263.667	2.45231	FP type I	NaBH4
E. sibiricum	10	cluster29	gcggtcgtggcggaatggtagacgcgctaggttgagggcctagtggtggcaacactgtggaggttcaagtcctctcgaccgcaccacca	LeuGAG	53	5' T-stem	G	0	2.19988	344	2.31964	FP type I	NaBH4
E. sibiricum	10	cluster29	gcggtcgtggcggaatggtagacgcgctaggttgagggcctagtggtggcaacactgtggaggttcaagtcctctcgaccgcaccacca	LeuGAG	21	D-loop	G	3.97896062505035e-07	1.53815	210	2.84172	FP type I	NaBH4
E. sibiricum	20	cluster29	gcggtcgtggcggaatggtagacgcgctaggttgagggcctagtggtggcaacactgtggaggttcaagtcctctcgaccgcaccacca	LeuGAG	21	D-loop	G	1.46599058873124e-07	2.00457	147.667	2.4424	FP type I	NaBH4
E. sibiricum	30	cluster29	gcggtcgtggcggaatggtagacgcgctaggttgagggcctagtggtggcaacactgtggaggttcaagtcctctcgaccgcaccacca	LeuGAG	13	5' D-stem	G	0.00897289	1.16812	52.3333	4.57816	FP type I	NaBH4
E. sibiricum	30	cluster29	gcggtcgtggcggaatggtagacgcgctaggttgagggcctagtggtggcaacactgtggaggttcaagtcctctcgaccgcaccacca	LeuGAG	21	D-loop	G	1.08764451483741e-08	2.0414	165	2.82127	FP type I	NaBH4
E. sibiricum	10	cluster3	tccgcaatagctcagtggtagagcaaccggctgttaaccggtaggtcgtaggttcaaatcctacttgcggagccacca	AsnGTT	49	5' T-stem	G	0	1.74269	1141.67	2.24615	FP type I	NaBH4
E. sibiricum	10	cluster3	tccgcaatagctcagtggtagagcaaccggctgttaaccggtaggtcgtaggttcaaatcctacttgcggagccacca	AsnGTT	45	V-region	G	0	3.07277	1012	4.7344	FP type I	NaBH4
E. sibiricum	10	cluster3	tccgcaatagctcagtggtagagcaaccggctgttaaccggtaggtcgtaggttcaaatcctacttgcggagccacca	AsnGTT	43	3' AC-stem	T	0	1.51518	675	3.3617	FP type I	NaBH4
E. sibiricum	10	cluster3	tccgcaatagctcagtggtagagcaaccggctgttaaccggtaggtcgtaggttcaaatcctacttgcggagccacca	AsnGTT	42	3' AC-stem	G	1.39241369243765e-14	1.00676	1043.67	5.32474	FP type I	NaBH4
E. sibiricum	20	cluster3	tccgcaatagctcagtggtagagcaaccggctgttaaccggtaggtcgtaggttcaaatcctacttgcggagccacca	AsnGTT	43	3' AC-stem	T	0	1.60505	771	2.26683	FP type I	NaBH4
E. sibiricum	20	cluster3	tccgcaatagctcagtggtagagcaaccggctgttaaccggtaggtcgtaggttcaaatcctacttgcggagccacca	AsnGTT	42	3' AC-stem	G	0	2.05576	1391	4.19642	FP type I	NaBH4
E. sibiricum	20	cluster3	tccgcaatagctcagtggtagagcaaccggctgttaaccggtaggtcgtaggttcaaatcctacttgcggagccacca	AsnGTT	45	V-region	G	0	3.73408	1898.33	5.21202	FP type I	NaBH4
E. sibiricum	30	cluster3	tccgcaatagctcagtggtagagcaaccggctgttaaccggtaggtcgtaggttcaaatcctacttgcggagccacca	AsnGTT	45	V-region	G	0	3.49252	1213.33	5.44544	FP type I	NaBH4
E. sibiricum	30	cluster3	tccgcaatagctcagtggtagagcaaccggctgttaaccggtaggtcgtaggttcaaatcctacttgcggagccacca	AsnGTT	43	3' AC-stem	T	2.97523346247542e-12	1.39054	485	2.31911	FP type I	NaBH4
E. sibiricum	30	cluster3	tccgcaatagctcagtggtagagcaaccggctgttaaccggtaggtcgtaggttcaaatcctacttgcggagccacca	AsnGTT	42	3' AC-stem	G	0	1.8082	801.667	3.91773	FP type I	NaBH4
E. sibiricum	10	cluster30	gagccattagctcagttggtagagcatctgacttttaatcagagggtcgcaggttcgaatcctgcatggctcaccacca	LysTTT-2	18	D-loop	G	0.00365741	1.30648	53.6667	2.60005	FP type I	NaBH4
E. sibiricum	10	cluster30	gagccattagctcagttggtagagcatctgacttttaatcagagggtcgcaggttcgaatcctgcatggctcaccacca	LysTTT-2	42	3' AC-stem	G	0	4.82554	1048.33	7.90639	FP type I	NaBH4
E. sibiricum	10	cluster30	gagccattagctcagttggtagagcatctgacttttaatcagagggtcgcaggttcgaatcctgcatggctcaccacca	LysTTT-2	45	V-region	G	0	4.03021	320	2.31834	FP type I	NaBH4
E. sibiricum	10	cluster30	gagccattagctcagttggtagagcatctgacttttaatcagagggtcgcaggttcgaatcctgcatggctcaccacca	LysTTT-2	30	5' AC-stem	G	0.00314774	1.45142	84	2.78563	FP type I	NaBH4
E. sibiricum	20	cluster30	gagccattagctcagttggtagagcatctgacttttaatcagagggtcgcaggttcgaatcctgcatggctcaccacca	LysTTT-2	33	AC-loop	T	1.74517046841033e-07	1.11561	396.333	18.7802	FP type I	NaBH4
E. sibiricum	20	cluster30	gagccattagctcagttggtagagcatctgacttttaatcagagggtcgcaggttcgaatcctgcatggctcaccacca	LysTTT-2	42	3' AC-stem	G	0	7.17501	2517.33	10.7418	FP type I	NaBH4
E. sibiricum	20	cluster30	gagccattagctcagttggtagagcatctgacttttaatcagagggtcgcaggttcgaatcctgcatggctcaccacca	LysTTT-2	45	V-region	G	0	5.04409	485	2.02234	FP type I	NaBH4
E. sibiricum	30	cluster30	gagccattagctcagttggtagagcatctgacttttaatcagagggtcgcaggttcgaatcctgcatggctcaccacca	LysTTT-2	42	3' AC-stem	G	0	6.36747	1844.67	10.5764	FP type I	NaBH4
E. sibiricum	30	cluster30	gagccattagctcagttggtagagcatctgacttttaatcagagggtcgcaggttcgaatcctgcatggctcaccacca	LysTTT-2	45	V-region	G	0	5.09765	396.333	2.21399	FP type I	NaBH4
E. sibiricum	10	cluster32	ggaggcgtactcaagtggtttaagagaacggtcttgaaaaccgtcaggcggcgaaagccgtgcgtgggttcgaatcccaccgcctcctccacca	SerTGA	47	V-region	G	4.01240921345063e-12	1.43199	433.667	4.62685	FP type I	NaBH4
E. sibiricum	10	cluster32	ggaggcgtactcaagtggtttaagagaacggtcttgaaaaccgtcaggcggcgaaagccgtgcgtgggttcgaatcccaccgcctcctccacca	SerTGA	3e	V-region	G	9.12553740121392e-06	1.18977	254.333	3.36286	FP type I	NaBH4
E. sibiricum	10	cluster32	ggaggcgtactcaagtggtttaagagaacggtcttgaaaaccgtcaggcggcgaaagccgtgcgtgggttcgaatcccaccgcctcctccacca	SerTGA	57	T-loop	G	0	3.14348	239.333	2.19522	FP type I	NaBH4
E. sibiricum	10	cluster32	ggaggcgtactcaagtggtttaagagaacggtcttgaaaaccgtcaggcggcgaaagccgtgcgtgggttcgaatcccaccgcctcctccacca	SerTGA	50	5' T-stem	T	0	2.68393	308	3.07963	FP type I	NaBH4
E. sibiricum	10	cluster32	ggaggcgtactcaagtggtttaagagaacggtcttgaaaaccgtcaggcggcgaaagccgtgcgtgggttcgaatcccaccgcctcctccacca	SerTGA	21e	V-region	G	1.42098946887655e-07	1.58425	195.333	2.2743	FP type I	NaBH4
E. sibiricum	10	cluster32	ggaggcgtactcaagtggtttaagagaacggtcttgaaaaccgtcaggcggcgaaagccgtgcgtgggttcgaatcccaccgcctcctccacca	SerTGA	46	V-region	T	8.00809518923897e-09	1.47551	266.667	2.98711	FP type I	NaBH4
E. sibiricum	20	cluster32	ggaggcgtactcaagtggtttaagagaacggtcttgaaaaccgtcaggcggcgaaagccgtgcgtgggttcgaatcccaccgcctcctccacca	SerTGA	57	T-loop	G	0	4.96736	278.667	3.36582	FP type I	NaBH4
E. sibiricum	20	cluster32	ggaggcgtactcaagtggtttaagagaacggtcttgaaaaccgtcaggcggcgaaagccgtgcgtgggttcgaatcccaccgcctcctccacca	SerTGA	46	V-region	T	0.000294357	1.09543	185.667	2.6027	FP type I	NaBH4
E. sibiricum	30	cluster32	ggaggcgtactcaagtggtttaagagaacggtcttgaaaaccgtcaggcggcgaaagccgtgcgtgggttcgaatcccaccgcctcctccacca	SerTGA	47	V-region	G	0.00144035	1.0578	132.667	2.74871	FP type I	NaBH4
E. sibiricum	30	cluster32	ggaggcgtactcaagtggtttaagagaacggtcttgaaaaccgtcaggcggcgaaagccgtgcgtgggttcgaatcccaccgcctcctccacca	SerTGA	57	T-loop	G	0	4.6236	225.333	4.09007	FP type I	NaBH4
E. sibiricum	30	cluster32	ggaggcgtactcaagtggtttaagagaacggtcttgaaaaccgtcaggcggcgaaagccgtgcgtgggttcgaatcccaccgcctcctccacca	SerTGA	42	3' AC-stem	G	0.00199721	1.09089	83.3333	2.19946	FP type I	NaBH4
E. sibiricum	30	cluster32	ggaggcgtactcaagtggtttaagagaacggtcttgaaaaccgtcaggcggcgaaagccgtgcgtgggttcgaatcccaccgcctcctccacca	SerTGA	60	T-loop	T	0	4.11162	157.667	2.71945	FP type I	NaBH4
E. sibiricum	30	cluster32	ggaggcgtactcaagtggtttaagagaacggtcttgaaaaccgtcaggcggcgaaagccgtgcgtgggttcgaatcccaccgcctcctccacca	SerTGA	46	V-region	T	0.00144035	1.08692	132	2.81426	FP type I	NaBH4
E. sibiricum	10	cluster33	ggaggattagctcagctgggagagcatctgccttacaagcagagggtcggcggttcgatcccgtcatcctccaccacca	ValTAC	30	5' AC-stem	G	0.000838424	1.35645	104.333	2.17269	FP type I	NaBH4
E. sibiricum	10	cluster33	ggaggattagctcagctgggagagcatctgccttacaagcagagggtcggcggttcgatcccgtcatcctccaccacca	ValTAC	27	5' AC-stem	T	8.066355125993e-05	1.65686	117.333	2.71489	FP type I	NaBH4
E. sibiricum	10	cluster33	ggaggattagctcagctgggagagcatctgccttacaagcagagggtcggcggttcgatcccgtcatcctccaccacca	ValTAC	45	V-region	G	0	4.55071	854	7.14451	FP type I	NaBH4
E. sibiricum	10	cluster33	ggaggattagctcagctgggagagcatctgccttacaagcagagggtcggcggttcgatcccgtcatcctccaccacca	ValTAC	44	V-region	G	5.99042907066467e-10	1.50938	311	2.78225	FP type I	NaBH4
E. sibiricum	20	cluster33	ggaggattagctcagctgggagagcatctgccttacaagcagagggtcggcggttcgatcccgtcatcctccaccacca	ValTAC	45	V-region	G	0	5.37658	757.333	8.51502	FP type I	NaBH4
E. sibiricum	20	cluster33	ggaggattagctcagctgggagagcatctgccttacaagcagagggtcggcggttcgatcccgtcatcctccaccacca	ValTAC	44	V-region	G	8.71089341603635e-10	2.02236	208	2.51114	FP type I	NaBH4
E. sibiricum	30	cluster33	ggaggattagctcagctgggagagcatctgccttacaagcagagggtcggcggttcgatcccgtcatcctccaccacca	ValTAC	45	V-region	G	0	6.01706	1065.67	11.6705	FP type I	NaBH4
E. sibiricum	30	cluster33	ggaggattagctcagctgggagagcatctgccttacaagcagagggtcggcggttcgatcccgtcatcctccaccacca	ValTAC	44	V-region	G	8.87261421331703e-15	2.33578	239.333	2.98002	FP type I	NaBH4
E. sibiricum	10	cluster34	gccggtgtggcggaactggtagacgcgcacgactcaaaatcgtgttcctttggagtgtcggttcgattccgaccaccggtaccacca	LeuCAA	21	D-loop	G	1.69829306765716e-09	1.83908	183.333	3.46964	FP type I	NaBH4
E. sibiricum	10	cluster34	gccggtgtggcggaactggtagacgcgcacgactcaaaatcgtgttcctttggagtgtcggttcgattccgaccaccggtaccacca	LeuCAA	21e	V-region	G	5.57431680768225e-12	1.84017	283.333	2.86439	FP type I	NaBH4
E. sibiricum	10	cluster34	gccggtgtggcggaactggtagacgcgcacgactcaaaatcgtgttcctttggagtgtcggttcgattccgaccaccggtaccacca	LeuCAA	45	V-region	T	3.3890587485004e-09	1.67236	233.333	2.91014	FP type I	NaBH4
E. sibiricum	10	cluster34	gccggtgtggcggaactggtagacgcgcacgactcaaaatcgtgttcctttggagtgtcggttcgattccgaccaccggtaccacca	LeuCAA	53	5' T-stem	G	0	3.37324	254.667	2.27432	FP type I	NaBH4
E. sibiricum	10	cluster34	gccggtgtggcggaactggtagacgcgcacgactcaaaatcgtgttcctttggagtgtcggttcgattccgaccaccggtaccacca	LeuCAA	2e	V-region	T	5.57431680768225e-12	1.78599	282	3.16752	FP type I	NaBH4
E. sibiricum	10	cluster34	gccggtgtggcggaactggtagacgcgcacgactcaaaatcgtgttcctttggagtgtcggttcgattccgaccaccggtaccacca	LeuCAA	49	5' T-stem	G	6.48133660802039e-12	2.09433	224.333	2.09862	FP type I	NaBH4
E. sibiricum	10	cluster34	gccggtgtggcggaactggtagacgcgcacgactcaaaatcgtgttcctttggagtgtcggttcgattccgaccaccggtaccacca	LeuCAA	3e	V-region	T	3.90944907623495e-08	1.55395	219.667	2.40762	FP type I	NaBH4
E. sibiricum	10	cluster34	gccggtgtggcggaactggtagacgcgcacgactcaaaatcgtgttcctttggagtgtcggttcgattccgaccaccggtaccacca	LeuCAA	44	V-region	T	0.00106297	1.13267	157.667	2.02724	FP type I	NaBH4
E. sibiricum	10	cluster34	gccggtgtggcggaactggtagacgcgcacgactcaaaatcgtgttcctttggagtgtcggttcgattccgaccaccggtaccacca	LeuCAA	5e	V-region	T	2.73830825310025e-08	1.19083	394.333	4.09513	FP type I	NaBH4
E. sibiricum	30	cluster34	gccggtgtggcggaactggtagacgcgcacgactcaaaatcgtgttcctttggagtgtcggttcgattccgaccaccggtaccacca	LeuCAA	21	D-loop	G	2.78244607895174e-08	2.11637	143.667	2.01449	FP type I	NaBH4
E. sibiricum	30	cluster34	gccggtgtggcggaactggtagacgcgcacgactcaaaatcgtgttcctttggagtgtcggttcgattccgaccaccggtaccacca	LeuCAA	5e	V-region	T	2.85756453972219e-05	1.10448	258	2.56161	FP type I	NaBH4
E. sibiricum	30	cluster34	gccggtgtggcggaactggtagacgcgcacgactcaaaatcgtgttcctttggagtgtcggttcgattccgaccaccggtaccacca	LeuCAA	12	5' D-stem	G	0	1.10963	22	4.01187	FP type I	NaBH4
E. sibiricum	10	cluster35	gcacccgtagctcaggggatagagcactggtttccggtaccaggtgtcgggagttcaaatctctccgggtgtaccacca	ArgCCG	44	V-region	G	0	3.37407	988	8.75754	FP type I	NaBH4
E. sibiricum	10	cluster35	gcacccgtagctcaggggatagagcactggtttccggtaccaggtgtcgggagttcaaatctctccgggtgtaccacca	ArgCCG	45	V-region	T	0	3.62198	636	5.31326	FP type I	NaBH4
E. sibiricum	20	cluster35	gcacccgtagctcaggggatagagcactggtttccggtaccaggtgtcgggagttcaaatctctccgggtgtaccacca	ArgCCG	44	V-region	G	0	3.61112	548	10.0661	FP type I	NaBH4
E. sibiricum	20	cluster35	gcacccgtagctcaggggatagagcactggtttccggtaccaggtgtcgggagttcaaatctctccgggtgtaccacca	ArgCCG	45	V-region	T	0	4.29184	530	8.83326	FP type I	NaBH4
E. sibiricum	30	cluster35	gcacccgtagctcaggggatagagcactggtttccggtaccaggtgtcgggagttcaaatctctccgggtgtaccacca	ArgCCG	44	V-region	G	0	3.68095	574	10.3769	FP type I	NaBH4
E. sibiricum	30	cluster35	gcacccgtagctcaggggatagagcactggtttccggtaccaggtgtcgggagttcaaatctctccgggtgtaccacca	ArgCCG	45	V-region	T	0	4.41922	624.333	10.157	FP type I	NaBH4
E. sibiricum	10	cluster36	ggggccttagctcagctgggagagcgcctgccttgcacgcaggaggtcagcggttcgatcccgctaggctccaccacca	AlaTGC	45	V-region	G	0	5.636	1460.67	9.6043	FP type I	NaBH4
E. sibiricum	10	cluster36	ggggccttagctcagctgggagagcgcctgccttgcacgcaggaggtcagcggttcgatcccgctaggctccaccacca	AlaTGC	39	3' AC-stem	G	0	2.29402	260.667	2.1406	FP type I	NaBH4
E. sibiricum	10	cluster36	ggggccttagctcagctgggagagcgcctgccttgcacgcaggaggtcagcggttcgatcccgctaggctccaccacca	AlaTGC	43	3' AC-stem	G	0	3.18735	485.667	3.62511	FP type I	NaBH4
E. sibiricum	10	cluster36	ggggccttagctcagctgggagagcgcctgccttgcacgcaggaggtcagcggttcgatcccgctaggctccaccacca	AlaTGC	22	3' D-stem	G	6.07664651930406e-11	2.21176	160.333	2.34544	FP type I	NaBH4
E. sibiricum	20	cluster36	ggggccttagctcagctgggagagcgcctgccttgcacgcaggaggtcagcggttcgatcccgctaggctccaccacca	AlaTGC	45	V-region	G	0	6.17409	1476.33	11.2118	FP type I	NaBH4
E. sibiricum	20	cluster36	ggggccttagctcagctgggagagcgcctgccttgcacgcaggaggtcagcggttcgatcccgctaggctccaccacca	AlaTGC	43	3' AC-stem	G	2.49907952575408e-14	2.23013	272	2.36577	FP type I	NaBH4
E. sibiricum	30	cluster36	ggggccttagctcagctgggagagcgcctgccttgcacgcaggaggtcagcggttcgatcccgctaggctccaccacca	AlaTGC	45	V-region	G	0	6.76542	2440	15.0314	FP type I	NaBH4
E. sibiricum	30	cluster36	ggggccttagctcagctgggagagcgcctgccttgcacgcaggaggtcagcggttcgatcccgctaggctccaccacca	AlaTGC	43	3' AC-stem	G	0	2.46712	423.667	3.13587	FP type I	NaBH4
E. sibiricum	10	cluster37	gattctgtagctcagctgggagagcgctaccttgacagggtagaggtcgctggttcgagcccagtcagaatcaccacca	ValGAC	41	3' AC-stem	T	2.76032722650991e-13	2.13859	235.333	2.29873	FP type I	NaBH4
E. sibiricum	10	cluster37	gattctgtagctcagctgggagagcgctaccttgacagggtagaggtcgctggttcgagcccagtcagaatcaccacca	ValGAC	45	V-region	G	0	4.80098	1697.33	12.9011	FP type I	NaBH4
E. sibiricum	10	cluster37	gattctgtagctcagctgggagagcgctaccttgacagggtagaggtcgctggttcgagcccagtcagaatcaccacca	ValGAC	40	3' AC-stem	G	2.40541207275944e-07	1.32442	288	2.81703	FP type I	NaBH4
E. sibiricum	10	cluster37	gattctgtagctcagctgggagagcgctaccttgacagggtagaggtcgctggttcgagcccagtcagaatcaccacca	ValGAC	28	5' AC-stem	T	0.000501927	1.00695	183.333	2.6228	FP type I	NaBH4
E. sibiricum	10	cluster37	gattctgtagctcagctgggagagcgctaccttgacagggtagaggtcgctggttcgagcccagtcagaatcaccacca	ValGAC	43	3' AC-stem	G	1.58298686888607e-15	1.4552	590.667	5.29337	FP type I	NaBH4
E. sibiricum	10	cluster37	gattctgtagctcagctgggagagcgctaccttgacagggtagaggtcgctggttcgagcccagtcagaatcaccacca	ValGAC	22	3' D-stem	G	1.45937282420412e-07	1.66804	180	2.75103	FP type I	NaBH4
E. sibiricum	20	cluster37	gattctgtagctcagctgggagagcgctaccttgacagggtagaggtcgctggttcgagcccagtcagaatcaccacca	ValGAC	45	V-region	G	0	5.61691	2235	18.6137	FP type I	NaBH4
E. sibiricum	20	cluster37	gattctgtagctcagctgggagagcgctaccttgacagggtagaggtcgctggttcgagcccagtcagaatcaccacca	ValGAC	43	3' AC-stem	G	0	2.83354	511.333	5.31647	FP type I	NaBH4
E. sibiricum	30	cluster37	gattctgtagctcagctgggagagcgctaccttgacagggtagaggtcgctggttcgagcccagtcagaatcaccacca	ValGAC	45	V-region	G	0	6.25838	2962	21.4019	FP type I	NaBH4
E. sibiricum	30	cluster37	gattctgtagctcagctgggagagcgctaccttgacagggtagaggtcgctggttcgagcccagtcagaatcaccacca	ValGAC	43	3' AC-stem	G	0	2.9124	663	6.19833	FP type I	NaBH4
E. sibiricum	10	cluster38	ggcgccatagccaagtggtaaggcagaggactgcaactcctctatcgtcagttcgattctgactggcgcctccacca	CysGCA	49	5' T-stem	G	1.49161144596337e-07	2.19873	95	2.69665	FP type I	NaBH4
E. sibiricum	10	cluster38	ggcgccatagccaagtggtaaggcagaggactgcaactcctctatcgtcagttcgattctgactggcgcctccacca	CysGCA	53	5' T-stem	G	1.25884673636056e-13	2.92973	108.333	2.74442	FP type I	NaBH4
E. sibiricum	10	cluster38	ggcgccatagccaagtggtaaggcagaggactgcaactcctctatcgtcagttcgattctgactggcgcctccacca	CysGCA	46	V-region	T	0.00900444	1.13901	75.6667	2.41067	FP type I	NaBH4
E. sibiricum	20	cluster38	ggcgccatagccaagtggtaaggcagaggactgcaactcctctatcgtcagttcgattctgactggcgcctccacca	CysGCA	19	D-loop	G	0	2.15315	352.667	13.0565	FP type I	NaBH4
E. sibiricum	30	cluster38	ggcgccatagccaagtggtaaggcagaggactgcaactcctctatcgtcagttcgattctgactggcgcctccacca	CysGCA	15	D-loop	G	0.00234927	1.33617	54.6667	2.83743	FP type I	NaBH4
E. sibiricum	30	cluster38	ggcgccatagccaagtggtaaggcagaggactgcaactcctctatcgtcagttcgattctgactggcgcctccacca	CysGCA	19	D-loop	G	0	2.17436	356.333	14.8359	FP type I	NaBH4
E. sibiricum	30	cluster38	ggcgccatagccaagtggtaaggcagaggactgcaactcctctatcgtcagttcgattctgactggcgcctccacca	CysGCA	46	V-region	T	0.00016361	1.4495	112.667	2.47035	FP type I	NaBH4
E. sibiricum	10	cluster39	gcgggtgtagtttagtggtaaaacctcagccttccaagctgatgatgagggttcgattcccttcacccgctccacca	GlyTCC-2	48	V-region	T	9.42275657431213e-08	1.91017	145	2.36524	FP type I	NaBH4
E. sibiricum	10	cluster39	gcgggtgtagtttagtggtaaaacctcagccttccaagctgatgatgagggttcgattcccttcacccgctccacca	GlyTCC-2	44	V-region	T	1.20073343181823e-06	1.77875	116	2.07894	FP type I	NaBH4
E. sibiricum	20	cluster4	ggcccgttggtcaagcggttaagacaccgccctttcacggcggtatcacgggttcgattcccgtacgggtcaccacca	GluTTC-2	33	AC-loop	T	0	2.15342	1470.67	3.44257	FP type I	NaBH4
E. sibiricum	20	cluster4	ggcccgttggtcaagcggttaagacaccgccctttcacggcggtatcacgggttcgattcccgtacgggtcaccacca	GluTTC-2	35	AC-loop	T	0	1.50793	1749	3.69243	FP type I	NaBH4
E. sibiricum	20	cluster4	ggcccgttggtcaagcggttaagacaccgccctttcacggcggtatcacgggttcgattcccgtacgggtcaccacca	GluTTC-2	34	AC-loop	T	0	1.55286	2687.67	5.90933	FP type I	NaBH4
E. sibiricum	30	cluster4	ggcccgttggtcaagcggttaagacaccgccctttcacggcggtatcacgggttcgattcccgtacgggtcaccacca	GluTTC-2	33	AC-loop	T	0	1.40994	1276	3.63542	FP type I	NaBH4
E. sibiricum	30	cluster4	ggcccgttggtcaagcggttaagacaccgccctttcacggcggtatcacgggttcgattcccgtacgggtcaccacca	GluTTC-2	35	AC-loop	T	0	1.04131	1385.33	3.60463	FP type I	NaBH4
E. sibiricum	10	cluster5	gcgggtgtagtttagtggtaaaacctcagccttccaagctgatgatgagagttcgattctcttcacccgctccacca	GlyTCC-1	53	5' T-stem	G	7.96770057339321e-16	2.19495	270.333	2.75945	FP type I	NaBH4
E. sibiricum	10	cluster5	gcgggtgtagtttagtggtaaaacctcagccttccaagctgatgatgagagttcgattctcttcacccgctccacca	GlyTCC-1	49	5' T-stem	G	2.04172630040016e-05	1.30441	195.667	2.15399	FP type I	NaBH4
E. sibiricum	10	cluster5	gcgggtgtagtttagtggtaaaacctcagccttccaagctgatgatgagagttcgattctcttcacccgctccacca	GlyTCC-1	44	V-region	T	2.28876045151203e-05	1.06501	266.333	3.29405	FP type I	NaBH4
E. sibiricum	10	cluster5	gcgggtgtagtttagtggtaaaacctcagccttccaagctgatgatgagagttcgattctcttcacccgctccacca	GlyTCC-1	48	V-region	T	7.54808502180871e-06	1.24091	236	2.65402	FP type I	NaBH4
E. sibiricum	10	cluster5	gcgggtgtagtttagtggtaaaacctcagccttccaagctgatgatgagagttcgattctcttcacccgctccacca	GlyTCC-1	51	5' T-stem	G	1.43418610321078e-13	1.73227	353.333	3.70198	FP type I	NaBH4
E. sibiricum	10	cluster7	ggcggtgtagctcagctggctagagcgtacggttcatacccgtgaggtcgtgggttcgactccctccgccgctaccacca	MetCAT-1	45	V-region	G	4.16270732643367e-12	2.46813	128.667	3.4189	FP type I	NaBH4
E. sibiricum	20	cluster7	ggcggtgtagctcagctggctagagcgtacggttcatacccgtgaggtcgtgggttcgactccctccgccgctaccacca	MetCAT-1	45	V-region	G	1.35661730041626e-11	2.69974	109	4.1572	FP type I	NaBH4
E. sibiricum	30	cluster7	ggcggtgtagctcagctggctagagcgtacggttcatacccgtgaggtcgtgggttcgactccctccgccgctaccacca	MetCAT-1	45	V-region	G	0	3.49966	156.333	6.31629	FP type I	NaBH4
E. sibiricum	10	cluster8	gggggcttagctcagctgggagagcgtttggctggcagccaaaaggtcgtcggttcgagcccgatagtctccaccacca	AlaGGC	49	5' T-stem	G	0.00652641	1.01654	84.3333	2.18518	FP type I	NaBH4
E. sibiricum	10	cluster8	gggggcttagctcagctgggagagcgtttggctggcagccaaaaggtcgtcggttcgagcccgatagtctccaccacca	AlaGGC	45	V-region	G	0	3.47693	152	6.55188	FP type I	NaBH4
E. sibiricum	20	cluster8	gggggcttagctcagctgggagagcgtttggctggcagccaaaaggtcgtcggttcgagcccgatagtctccaccacca	AlaGGC	45	V-region	G	0	2.90388	83.3333	9.73211	FP type I	NaBH4
E. sibiricum	30	cluster8	gggggcttagctcagctgggagagcgtttggctggcagccaaaaggtcgtcggttcgagcccgatagtctccaccacca	AlaGGC	45	V-region	G	0	3.35501	84	12.6008	FP type I	NaBH4
E. sibiricum	10	cluster9	cgcggggtggagcagtctggtagctcgttgggctcataacccaaaggtcgtcggttcaaatccggcccccgcaaccacca	MetCAT-2	15	D-loop	G	0.000185132	1.17906	173	3.54918	FP type I	NaBH4
E. sibiricum	10	cluster9	cgcggggtggagcagtctggtagctcgttgggctcataacccaaaggtcgtcggttcaaatccggcccccgcaaccacca	MetCAT-2	36	AC-loop	T	3.14514496318153e-15	1.51507	516	4.48138	FP type I	NaBH4
E. sibiricum	10	cluster9	cgcggggtggagcagtctggtagctcgttgggctcataacccaaaggtcgtcggttcaaatccggcccccgcaaccacca	MetCAT-2	10	5' D-stem	G	0.00652641	1.11472	92	2.0815	FP type I	NaBH4
E. sibiricum	10	cluster9	cgcggggtggagcagtctggtagctcgttgggctcataacccaaaggtcgtcggttcaaatccggcccccgcaaccacca	MetCAT-2	49	5' T-stem	G	0	2.48227	294	2.08621	FP type I	NaBH4
E. sibiricum	10	cluster1	gcggaagtagttcagtggtagaatacgaccttgccaaggtcggggtcgcgggttcgaatcccgtcttccgctccacca	GlyGCC	47	V-region	T	0	2.61616	726	3.94149	D	NaBH4
E. sibiricum	10	cluster1	gcggaagtagttcagtggtagaatacgaccttgccaaggtcggggtcgcgggttcgaatcccgtcttccgctccacca	GlyGCC	20	D-loop	T	0	2.7377	1354.33	28.153	D	NaBH4
E. sibiricum	20	cluster1	gcggaagtagttcagtggtagaatacgaccttgccaaggtcggggtcgcgggttcgaatcccgtcttccgctccacca	GlyGCC	47	V-region	T	0	3.21122	393.333	2.37417	D	NaBH4
E. sibiricum	20	cluster1	gcggaagtagttcagtggtagaatacgaccttgccaaggtcggggtcgcgggttcgaatcccgtcttccgctccacca	GlyGCC	20	D-loop	T	0	3.22258	681.667	14.8456	D	NaBH4
E. sibiricum	30	cluster1	gcggaagtagttcagtggtagaatacgaccttgccaaggtcggggtcgcgggttcgaatcccgtcttccgctccacca	GlyGCC	47	V-region	T	0	3.333	539.333	2.42673	D	NaBH4
E. sibiricum	30	cluster1	gcggaagtagttcagtggtagaatacgaccttgccaaggtcggggtcgcgggttcgaatcccgtcttccgctccacca	GlyGCC	20	D-loop	T	0	3.56404	1104.67	20.7703	D	NaBH4
E. sibiricum	10	cluster11	gggcctatagctcagctggttagagcgcacgcctgataagcgtgaggtcggtggttcgagtccacttaggcccaccacca	IleGAT	17	D-loop	T	0	1.92957	1439.67	67.771	D	NaBH4
E. sibiricum	10	cluster11	gggcctatagctcagctggttagagcgcacgcctgataagcgtgaggtcggtggttcgagtccacttaggcccaccacca	IleGAT	20a	D-loop	T	0	3.16255	5923.67	25.5732	D	NaBH4
E. sibiricum	10	cluster11	gggcctatagctcagctggttagagcgcacgcctgataagcgtgaggtcggtggttcgagtccacttaggcccaccacca	IleGAT	20	D-loop	T	0	4.39479	14670.7	86.1097	D	NaBH4
E. sibiricum	20	cluster11	gggcctatagctcagctggttagagcgcacgcctgataagcgtgaggtcggtggttcgagtccacttaggcccaccacca	IleGAT	20a	D-loop	T	0	4.09983	9184.67	22.7751	D	NaBH4
E. sibiricum	20	cluster11	gggcctatagctcagctggttagagcgcacgcctgataagcgtgaggtcggtggttcgagtccacttaggcccaccacca	IleGAT	17	D-loop	T	0	2.23973	3151	87.4141	D	NaBH4
E. sibiricum	20	cluster11	gggcctatagctcagctggttagagcgcacgcctgataagcgtgaggtcggtggttcgagtccacttaggcccaccacca	IleGAT	20	D-loop	T	0	5.54038	26884.7	86.4007	D	NaBH4
E. sibiricum	30	cluster11	gggcctatagctcagctggttagagcgcacgcctgataagcgtgaggtcggtggttcgagtccacttaggcccaccacca	IleGAT	17	D-loop	T	0	2.09555	2335.67	87.1883	D	NaBH4
E. sibiricum	30	cluster11	gggcctatagctcagctggttagagcgcacgcctgataagcgtgaggtcggtggttcgagtccacttaggcccaccacca	IleGAT	20a	D-loop	T	0	4.18797	8163	23.3319	D	NaBH4
E. sibiricum	30	cluster11	gggcctatagctcagctggttagagcgcacgcctgataagcgtgaggtcggtggttcgagtccacttaggcccaccacca	IleGAT	20	D-loop	T	0	5.6515	23647.7	88.1942	D	NaBH4
E. sibiricum	10	cluster12	gccggggtggcggaactggtagacgcacaggacttaaaatcctgcgggggtttccccgtgccggttcgattccggccctcggtaccacca	LeuTAA	17	D-loop	T	0	4.4683	834.333	50.8042	D	NaBH4
E. sibiricum	10	cluster12	gccggggtggcggaactggtagacgcacaggacttaaaatcctgcgggggtttccccgtgccggttcgattccggccctcggtaccacca	LeuTAA	20	D-loop	T	0	5.31463	2255.67	57.5098	D	NaBH4
E. sibiricum	20	cluster12	gccggggtggcggaactggtagacgcacaggacttaaaatcctgcgggggtttccccgtgccggttcgattccggccctcggtaccacca	LeuTAA	17	D-loop	T	0	5.84258	1412.67	67.1072	D	NaBH4
E. sibiricum	20	cluster12	gccggggtggcggaactggtagacgcacaggacttaaaatcctgcgggggtttccccgtgccggttcgattccggccctcggtaccacca	LeuTAA	20	D-loop	T	0	5.10761	1169.67	35.6788	D	NaBH4
E. sibiricum	30	cluster12	gccggggtggcggaactggtagacgcacaggacttaaaatcctgcgggggtttccccgtgccggttcgattccggccctcggtaccacca	LeuTAA	17	D-loop	T	0	5.56424	1340.67	79.459	D	NaBH4
E. sibiricum	30	cluster12	gccggggtggcggaactggtagacgcacaggacttaaaatcctgcgggggtttccccgtgccggttcgattccggccctcggtaccacca	LeuTAA	20	D-loop	T	0	5.3568	1291.67	42.3462	D	NaBH4
E. sibiricum	10	cluster13	aggggcatagtttagcggtagaactacggtctccaaaaccgtcagcgcgggttcgattcctgctgcccctgccacca	TrpCCA	20	D-loop	T	0	2.34234	415	23.0765	D	NaBH4
E. sibiricum	20	cluster13	aggggcatagtttagcggtagaactacggtctccaaaaccgtcagcgcgggttcgattcctgctgcccctgccacca	TrpCCA	20	D-loop	T	0	2.90499	240.333	18.8835	D	NaBH4
E. sibiricum	30	cluster13	aggggcatagtttagcggtagaactacggtctccaaaaccgtcagcgcgggttcgattcctgctgcccctgccacca	TrpCCA	20	D-loop	T	0	3.37879	514.667	21.7899	D	NaBH4
E. sibiricum	10	cluster14	ggagtcgtacccaagcccggctgaaggggacggactcgaaatccgttaggggtcgcaaggcccgcgtgggttcgaatcccaccgactccgccacca	SerCGA	20a	D-loop	T	0	3.4473	186.333	66.9797	D	NaBH4
E. sibiricum	20	cluster14	ggagtcgtacccaagcccggctgaaggggacggactcgaaatccgttaggggtcgcaaggcccgcgtgggttcgaatcccaccgactccgccacca	SerCGA	20a	D-loop	T	9.11173664796096e-13	3.06153	113.333	74.3982	D	NaBH4
E. sibiricum	30	cluster14	ggagtcgtacccaagcccggctgaaggggacggactcgaaatccgttaggggtcgcaaggcccgcgtgggttcgaatcccaccgactccgccacca	SerCGA	20a	D-loop	T	0	3.31975	165.333	81.5312	D	NaBH4
E. sibiricum	10	cluster15	gcacccttagctcagctggatagagtacttgactacgaatcaaggggtcgggagttcgaatctctcagggtgcaccacca	ArgACG	17	D-loop	T	0	3.06308	726.333	32.0527	D	NaBH4
E. sibiricum	10	cluster15	gcacccttagctcagctggatagagtacttgactacgaatcaaggggtcgggagttcgaatctctcagggtgcaccacca	ArgACG	20a	D-loop	T	0	2.39033	854	23.2671	D	NaBH4
E. sibiricum	20	cluster15	gcacccttagctcagctggatagagtacttgactacgaatcaaggggtcgggagttcgaatctctcagggtgcaccacca	ArgACG	17	D-loop	T	0	5.1527	2113.33	58.3101	D	NaBH4
E. sibiricum	20	cluster15	gcacccttagctcagctggatagagtacttgactacgaatcaaggggtcgggagttcgaatctctcagggtgcaccacca	ArgACG	20a	D-loop	T	0	3.16877	667.667	15.646	D	NaBH4
E. sibiricum	30	cluster15	gcacccttagctcagctggatagagtacttgactacgaatcaaggggtcgggagttcgaatctctcagggtgcaccacca	ArgACG	17	D-loop	T	0	4.93218	2064.67	56.7198	D	NaBH4
E. sibiricum	30	cluster15	gcacccttagctcagctggatagagtacttgactacgaatcaaggggtcgggagttcgaatctctcagggtgcaccacca	ArgACG	20a	D-loop	T	0	3.36808	1034.33	20.9549	D	NaBH4
E. sibiricum	10	cluster16	ggcccgttggtcaagcggttaagacaccgccctttcacggcggtaacacgggttcgattcccgtacgggtcaccacca	GluTTC-1	20a	D-loop	T	0	5.05881	14596.3	56.2283	D	NaBH4
E. sibiricum	10	cluster16	ggcccgttggtcaagcggttaagacaccgccctttcacggcggtaacacgggttcgattcccgtacgggtcaccacca	GluTTC-1	20	D-loop	T	0	1.56139	8957.33	79.0008	D	NaBH4
E. sibiricum	20	cluster16	ggcccgttggtcaagcggttaagacaccgccctttcacggcggtaacacgggttcgattcccgtacgggtcaccacca	GluTTC-1	20a	D-loop	T	0	5.84927	19362	68.3812	D	NaBH4
E. sibiricum	30	cluster16	ggcccgttggtcaagcggttaagacaccgccctttcacggcggtaacacgggttcgattcccgtacgggtcaccacca	GluTTC-1	20a	D-loop	T	0	5.96115	15875.7	71.9337	D	NaBH4
E. sibiricum	10	cluster17	tgggctgtggccaagtggtaaggcactggattttgattccagcatgcgaaggttcgatcccttccagcccagccacca	GlnTTG	20	D-loop	T	2.80437802343006e-11	1.16713	587.667	10.6419	D	NaBH4
E. sibiricum	20	cluster17	tgggctgtggccaagtggtaaggcactggattttgattccagcatgcgaaggttcgatcccttccagcccagccacca	GlnTTG	20	D-loop	T	0	2.92737	943	8.35174	D	NaBH4
E. sibiricum	30	cluster17	tgggctgtggccaagtggtaaggcactggattttgattccagcatgcgaaggttcgatcccttccagcccagccacca	GlnTTG	20	D-loop	T	0	3.18137	828.333	10.1645	D	NaBH4
E. sibiricum	10	cluster18	ggacccttagctcagctggttagagctgacggctcataaccgtccggtcgcaggttcgagtcctgcagggtccaccacca	MetCAT-3	20a	D-loop	T	0	2.2592	43	25.4478	D	NaBH4
E. sibiricum	10	cluster18	ggacccttagctcagctggttagagctgacggctcataaccgtccggtcgcaggttcgagtcctgcagggtccaccacca	MetCAT-3	20	D-loop	T	0	3.81076	95.3333	75.1066	D	NaBH4
E. sibiricum	10	cluster18	ggacccttagctcagctggttagagctgacggctcataaccgtccggtcgcaggttcgagtcctgcagggtccaccacca	MetCAT-3	17	D-loop	T	0	1.38195	21.3333	78.5982	D	NaBH4
E. sibiricum	20	cluster18	ggacccttagctcagctggttagagctgacggctcataaccgtccggtcgcaggttcgagtcctgcagggtccaccacca	MetCAT-3	20	D-loop	T	0	4.31075	168.333	67.2975	D	NaBH4
E. sibiricum	20	cluster18	ggacccttagctcagctggttagagctgacggctcataaccgtccggtcgcaggttcgagtcctgcagggtccaccacca	MetCAT-3	17	D-loop	T	0	2.46558	58	84.4491	D	NaBH4
E. sibiricum	20	cluster18	ggacccttagctcagctggttagagctgacggctcataaccgtccggtcgcaggttcgagtcctgcagggtccaccacca	MetCAT-3	20a	D-loop	T	0	2.44927	56	18.1537	D	NaBH4
E. sibiricum	30	cluster18	ggacccttagctcagctggttagagctgacggctcataaccgtccggtcgcaggttcgagtcctgcagggtccaccacca	MetCAT-3	20a	D-loop	T	0	2.79148	57	21.78	D	NaBH4
E. sibiricum	30	cluster18	ggacccttagctcagctggttagagctgacggctcataaccgtccggtcgcaggttcgagtcctgcagggtccaccacca	MetCAT-3	20	D-loop	T	0	4.26308	151.333	73.3843	D	NaBH4
E. sibiricum	30	cluster18	ggacccttagctcagctggttagagctgacggctcataaccgtccggtcgcaggttcgagtcctgcagggtccaccacca	MetCAT-3	17	D-loop	T	0	2.04435	37.6667	82.4881	D	NaBH4
E. sibiricum	10	cluster19	ggtcctgtggtgtagcggttaacatgcctgcctgtcacgcaggagatcgcgggttcgaatcccgtcaggaccgccacca	AspGTC	20	D-loop	T	0	4.82792	18826	93.2251	D	NaBH4
E. sibiricum	10	cluster19	ggtcctgtggtgtagcggttaacatgcctgcctgtcacgcaggagatcgcgggttcgaatcccgtcaggaccgccacca	AspGTC	20a	D-loop	T	0	3.87702	13628.7	40.15	D	NaBH4
E. sibiricum	20	cluster19	ggtcctgtggtgtagcggttaacatgcctgcctgtcacgcaggagatcgcgggttcgaatcccgtcaggaccgccacca	AspGTC	20	D-loop	T	0	5.94057	20400.3	92.6597	D	NaBH4
E. sibiricum	20	cluster19	ggtcctgtggtgtagcggttaacatgcctgcctgtcacgcaggagatcgcgggttcgaatcccgtcaggaccgccacca	AspGTC	20a	D-loop	T	0	5.21294	13134	37.3421	D	NaBH4
E. sibiricum	30	cluster19	ggtcctgtggtgtagcggttaacatgcctgcctgtcacgcaggagatcgcgggttcgaatcccgtcaggaccgccacca	AspGTC	20	D-loop	T	0	6.01102	25728.3	94.9331	D	NaBH4
E. sibiricum	30	cluster19	ggtcctgtggtgtagcggttaacatgcctgcctgtcacgcaggagatcgcgggttcgaatcccgtcaggaccgccacca	AspGTC	20a	D-loop	T	0	5.2678	16896.3	38.362	D	NaBH4
E. sibiricum	10	cluster2	gcgggtgtggcggaattggtagacgcgctagatttaggatctagtgtctttgacgtgggggttcaagtcccttcacccgtaccacca	LeuTAG	17	D-loop	T	0	1.37773	22.6667	48.0605	D	NaBH4
E. sibiricum	10	cluster2	gcgggtgtggcggaattggtagacgcgctagatttaggatctagtgtctttgacgtgggggttcaagtcccttcacccgtaccacca	LeuTAG	20	D-loop	T	0	3.61049	147.667	74.8303	D	NaBH4
E. sibiricum	20	cluster2	gcgggtgtggcggaattggtagacgcgctagatttaggatctagtgtctttgacgtgggggttcaagtcccttcacccgtaccacca	LeuTAG	20	D-loop	T	0	3.00472	76.6667	68.0296	D	NaBH4
E. sibiricum	20	cluster2	gcgggtgtggcggaattggtagacgcgctagatttaggatctagtgtctttgacgtgggggttcaagtcccttcacccgtaccacca	LeuTAG	17	D-loop	T	0	1.46093	23.6667	64.4722	D	NaBH4
E. sibiricum	30	cluster2	gcgggtgtggcggaattggtagacgcgctagatttaggatctagtgtctttgacgtgggggttcaagtcccttcacccgtaccacca	LeuTAG	17	D-loop	T	0	2.17446	42.3333	70.3381	D	NaBH4
E. sibiricum	30	cluster2	gcgggtgtggcggaattggtagacgcgctagatttaggatctagtgtctttgacgtgggggttcaagtcccttcacccgtaccacca	LeuTAG	20	D-loop	T	0	3.70283	137.667	67.849	D	NaBH4
E. sibiricum	10	cluster20	ggctttgtagctcagtcggtagagcagaggactgaaaatcctcgtgtcggcggttcgattccgtccaaagccaccacca	PheGAA	47	V-region	T	0	3.26	741.667	3.04608	D	NaBH4
E. sibiricum	10	cluster20	ggctttgtagctcagtcggtagagcagaggactgaaaatcctcgtgtcggcggttcgattccgtccaaagccaccacca	PheGAA	20	D-loop	T	0	3.34097	1584.33	17.8872	D	NaBH4
E. sibiricum	20	cluster20	ggctttgtagctcagtcggtagagcagaggactgaaaatcctcgtgtcggcggttcgattccgtccaaagccaccacca	PheGAA	47	V-region	T	0	3.41415	867.333	2.04922	D	NaBH4
E. sibiricum	20	cluster20	ggctttgtagctcagtcggtagagcagaggactgaaaatcctcgtgtcggcggttcgattccgtccaaagccaccacca	PheGAA	20	D-loop	T	0	4.2257	1832	10.8429	D	NaBH4
E. sibiricum	30	cluster20	ggctttgtagctcagtcggtagagcagaggactgaaaatcctcgtgtcggcggttcgattccgtccaaagccaccacca	PheGAA	47	V-region	T	0	3.48611	580	2.07004	D	NaBH4
E. sibiricum	30	cluster20	ggctttgtagctcagtcggtagagcagaggactgaaaatcctcgtgtcggcggttcgattccgtccaaagccaccacca	PheGAA	20	D-loop	T	0	4.41647	1464.67	14.2031	D	NaBH4
E. sibiricum	10	cluster21	cgggaagtagctcagcttggtagagcacttggtttgggaccaaggggtcgcaggttcgaatcctgtcttcccgaccacca	ProTGG	20	D-loop	T	0	4.21261	660	43.384	D	NaBH4
E. sibiricum	20	cluster21	cgggaagtagctcagcttggtagagcacttggtttgggaccaaggggtcgcaggttcgaatcctgtcttcccgaccacca	ProTGG	20	D-loop	T	0	4.54808	646	37.8049	D	NaBH4
E. sibiricum	30	cluster21	cgggaagtagctcagcttggtagagcacttggtttgggaccaaggggtcgcaggttcgaatcctgtcttcccgaccacca	ProTGG	20	D-loop	T	0	4.41408	504	43.3944	D	NaBH4
E. sibiricum	10	cluster22	gtctcaatagctcagctggatagagcaacgcccttctaaggcgtcggtcgggggttcgaatccctcttgggacaccacca	ArgTCT	47	V-region	T	0.00105604	1.62096	77.3333	2.00176	D	NaBH4
E. sibiricum	10	cluster22	gtctcaatagctcagctggatagagcaacgcccttctaaggcgtcggtcgggggttcgaatccctcttgggacaccacca	ArgTCT	17	D-loop	T	5.32675283841994e-07	1.7368	174	36.0327	D	NaBH4
E. sibiricum	10	cluster22	gtctcaatagctcagctggatagagcaacgcccttctaaggcgtcggtcgggggttcgaatccctcttgggacaccacca	ArgTCT	20a	D-loop	T	0.000262556	1.20048	160.333	21.4576	D	NaBH4
E. sibiricum	20	cluster22	gtctcaatagctcagctggatagagcaacgcccttctaaggcgtcggtcgggggttcgaatccctcttgggacaccacca	ArgTCT	17	D-loop	T	0	4.15934	455.333	59.7016	D	NaBH4
E. sibiricum	20	cluster22	gtctcaatagctcagctggatagagcaacgcccttctaaggcgtcggtcgggggttcgaatccctcttgggacaccacca	ArgTCT	20a	D-loop	T	8.35130025580095e-08	2.0505	112	12.321	D	NaBH4
E. sibiricum	30	cluster22	gtctcaatagctcagctggatagagcaacgcccttctaaggcgtcggtcgggggttcgaatccctcttgggacaccacca	ArgTCT	17	D-loop	T	0	3.62161	432	61.4353	D	NaBH4
E. sibiricum	30	cluster22	gtctcaatagctcagctggatagagcaacgcccttctaaggcgtcggtcgggggttcgaatccctcttgggacaccacca	ArgTCT	20a	D-loop	T	1.94767601498537e-13	2.82439	143	16.0479	D	NaBH4
E. sibiricum	10	cluster23	ggagatgtacccaagtggctataaggggcgcccctgctaagggtgtaggccgggaaactggtgcgagggttcgaatccctccatctccgccacca	SerGCT	20	D-loop	T	0	1.93358	526.333	56.3251	D	NaBH4
E. sibiricum	20	cluster23	ggagatgtacccaagtggctataaggggcgcccctgctaagggtgtaggccgggaaactggtgcgagggttcgaatccctccatctccgccacca	SerGCT	20	D-loop	T	0	3.07355	207.333	67.9499	D	NaBH4
E. sibiricum	30	cluster23	ggagatgtacccaagtggctataaggggcgcccctgctaagggtgtaggccgggaaactggtgcgagggttcgaatccctccatctccgccacca	SerGCT	20	D-loop	T	0	2.79856	168.667	80.5845	D	NaBH4
E. sibiricum	10	cluster26	gtgtcattagctcagttggtagagcatctgacttttaatcagagggtcgcaggttcgaatcctgcatgacacaccacca	LysTTT-1	20	D-loop	T	0	4.04261	1019.67	20.0601	D	NaBH4
E. sibiricum	10	cluster26	gtgtcattagctcagttggtagagcatctgacttttaatcagagggtcgcaggttcgaatcctgcatgacacaccacca	LysTTT-1	16	D-loop	T	0	1.69542	605.333	27.9278	D	NaBH4
E. sibiricum	10	cluster26	gtgtcattagctcagttggtagagcatctgacttttaatcagagggtcgcaggttcgaatcctgcatgacacaccacca	LysTTT-1	17	D-loop	T	0	4.92231	1521.67	41.1001	D	NaBH4
E. sibiricum	10	cluster26	gtgtcattagctcagttggtagagcatctgacttttaatcagagggtcgcaggttcgaatcctgcatgacacaccacca	LysTTT-1	47	V-region	T	0	4.21416	1048	2.10313	D	NaBH4
E. sibiricum	20	cluster26	gtgtcattagctcagttggtagagcatctgacttttaatcagagggtcgcaggttcgaatcctgcatgacacaccacca	LysTTT-1	20	D-loop	T	0	4.72222	437	16.7638	D	NaBH4
E. sibiricum	20	cluster26	gtgtcattagctcagttggtagagcatctgacttttaatcagagggtcgcaggttcgaatcctgcatgacacaccacca	LysTTT-1	16	D-loop	T	0	2.81529	324.333	33.7753	D	NaBH4
E. sibiricum	20	cluster26	gtgtcattagctcagttggtagagcatctgacttttaatcagagggtcgcaggttcgaatcctgcatgacacaccacca	LysTTT-1	17	D-loop	T	0	5.97672	1302.67	56.0445	D	NaBH4
E. sibiricum	30	cluster26	gtgtcattagctcagttggtagagcatctgacttttaatcagagggtcgcaggttcgaatcctgcatgacacaccacca	LysTTT-1	20	D-loop	T	0	4.79075	419.333	15.6514	D	NaBH4
E. sibiricum	30	cluster26	gtgtcattagctcagttggtagagcatctgacttttaatcagagggtcgcaggttcgaatcctgcatgacacaccacca	LysTTT-1	16	D-loop	T	0	3.03849	348.667	34.2784	D	NaBH4
E. sibiricum	30	cluster26	gtgtcattagctcagttggtagagcatctgacttttaatcagagggtcgcaggttcgaatcctgcatgacacaccacca	LysTTT-1	17	D-loop	T	0	5.92216	1167	53.5274	D	NaBH4
E. sibiricum	10	cluster27	gccggtgtagctcagctggtagagcaactgacttgtaatcagtaggtcgcgggttcgactcctgttgccggcaccacca	ThrTGT	17	D-loop	T	0	3.3165	542.333	20.9771	D	NaBH4
E. sibiricum	10	cluster27	gccggtgtagctcagctggtagagcaactgacttgtaatcagtaggtcgcgggttcgactcctgttgccggcaccacca	ThrTGT	20	D-loop	T	0	3.4951	575	17.0115	D	NaBH4
E. sibiricum	10	cluster27	gccggtgtagctcagctggtagagcaactgacttgtaatcagtaggtcgcgggttcgactcctgttgccggcaccacca	ThrTGT	47	V-region	T	0	2.82781	409.667	3.51881	D	NaBH4
E. sibiricum	20	cluster27	gccggtgtagctcagctggtagagcaactgacttgtaatcagtaggtcgcgggttcgactcctgttgccggcaccacca	ThrTGT	20	D-loop	T	0	3.7139	385	10.8525	D	NaBH4
E. sibiricum	20	cluster27	gccggtgtagctcagctggtagagcaactgacttgtaatcagtaggtcgcgggttcgactcctgttgccggcaccacca	ThrTGT	17	D-loop	T	0	4.65742	918.333	29.1796	D	NaBH4
E. sibiricum	30	cluster27	gccggtgtagctcagctggtagagcaactgacttgtaatcagtaggtcgcgggttcgactcctgttgccggcaccacca	ThrTGT	17	D-loop	T	0	4.57968	1590	31.0198	D	NaBH4
E. sibiricum	30	cluster27	gccggtgtagctcagctggtagagcaactgacttgtaatcagtaggtcgcgggttcgactcctgttgccggcaccacca	ThrTGT	20	D-loop	T	0	4.41356	947.667	14.7849	D	NaBH4
E. sibiricum	10	cluster28	gggggggtagcgaagtggctaaacgcggcggactgtaaatccgctccctcgggttcggcggttcgaatccgcccccccccaccacca	TyrGTA	47	V-region	T	1.61461596780826e-11	2.14647	197.667	2.94599	D	NaBH4
E. sibiricum	20	cluster28	gggggggtagcgaagtggctaaacgcggcggactgtaaatccgctccctcgggttcggcggttcgaatccgcccccccccaccacca	TyrGTA	47	V-region	T	2.66952760628429e-05	2.09485	60.3333	2.56299	D	NaBH4
E. sibiricum	30	cluster28	gggggggtagcgaagtggctaaacgcggcggactgtaaatccgctccctcgggttcggcggttcgaatccgcccccccccaccacca	TyrGTA	47	V-region	T	3.46811950302127e-06	2.23207	85	2.75458	D	NaBH4
E. sibiricum	10	cluster29	gcggtcgtggcggaatggtagacgcgctaggttgagggcctagtggtggcaacactgtggaggttcaagtcctctcgaccgcaccacca	LeuGAG	20	D-loop	T	0	4.90957	5711	80.5284	D	NaBH4
E. sibiricum	20	cluster29	gcggtcgtggcggaatggtagacgcgctaggttgagggcctagtggtggcaacactgtggaggttcaagtcctctcgaccgcaccacca	LeuGAG	20	D-loop	T	0	5.73259	3804	66.0662	D	NaBH4
E. sibiricum	30	cluster29	gcggtcgtggcggaatggtagacgcgctaggttgagggcctagtggtggcaacactgtggaggttcaagtcctctcgaccgcaccacca	LeuGAG	20	D-loop	T	0	5.68561	4083.33	73.2073	D	NaBH4
E. sibiricum	10	cluster3	tccgcaatagctcagtggtagagcaaccggctgttaaccggtaggtcgtaggttcaaatcctacttgcggagccacca	AsnGTT	20	D-loop	T	0	1.79472	1219	14.9391	D	NaBH4
E. sibiricum	10	cluster3	tccgcaatagctcagtggtagagcaaccggctgttaaccggtaggtcgtaggttcaaatcctacttgcggagccacca	AsnGTT	47	V-region	T	0	2.4038	1746.33	3.58393	D	NaBH4
E. sibiricum	20	cluster3	tccgcaatagctcagtggtagagcaaccggctgttaaccggtaggtcgtaggttcaaatcctacttgcggagccacca	AsnGTT	20	D-loop	T	0	2.67525	1533	8.91368	D	NaBH4
E. sibiricum	30	cluster3	tccgcaatagctcagtggtagagcaaccggctgttaaccggtaggtcgtaggttcaaatcctacttgcggagccacca	AsnGTT	20	D-loop	T	0	2.68174	1151	10.3133	D	NaBH4
E. sibiricum	10	cluster30	gagccattagctcagttggtagagcatctgacttttaatcagagggtcgcaggttcgaatcctgcatggctcaccacca	LysTTT-2	16	D-loop	T	0	2.51093	634.333	47.3956	D	NaBH4
E. sibiricum	10	cluster30	gagccattagctcagttggtagagcatctgacttttaatcagagggtcgcaggttcgaatcctgcatggctcaccacca	LysTTT-2	47	V-region	T	0	3.89503	435.667	2.18815	D	NaBH4
E. sibiricum	10	cluster30	gagccattagctcagttggtagagcatctgacttttaatcagagggtcgcaggttcgaatcctgcatggctcaccacca	LysTTT-2	20	D-loop	T	0	3.75266	435	16.6671	D	NaBH4
E. sibiricum	10	cluster30	gagccattagctcagttggtagagcatctgacttttaatcagagggtcgcaggttcgaatcctgcatggctcaccacca	LysTTT-2	17	D-loop	T	0	4.41928	684	33.6163	D	NaBH4
E. sibiricum	20	cluster30	gagccattagctcagttggtagagcatctgacttttaatcagagggtcgcaggttcgaatcctgcatggctcaccacca	LysTTT-2	20	D-loop	T	0	3.86206	176.667	13.8063	D	NaBH4
E. sibiricum	20	cluster30	gagccattagctcagttggtagagcatctgacttttaatcagagggtcgcaggttcgaatcctgcatggctcaccacca	LysTTT-2	16	D-loop	T	0	3.67747	283.667	50.6662	D	NaBH4
E. sibiricum	20	cluster30	gagccattagctcagttggtagagcatctgacttttaatcagagggtcgcaggttcgaatcctgcatggctcaccacca	LysTTT-2	17	D-loop	T	0	5.41071	645	52.6609	D	NaBH4
E. sibiricum	30	cluster30	gagccattagctcagttggtagagcatctgacttttaatcagagggtcgcaggttcgaatcctgcatggctcaccacca	LysTTT-2	16	D-loop	T	0	3.72277	384.667	56.2548	D	NaBH4
E. sibiricum	30	cluster30	gagccattagctcagttggtagagcatctgacttttaatcagagggtcgcaggttcgaatcctgcatggctcaccacca	LysTTT-2	20	D-loop	T	0	4.08789	207	13.4094	D	NaBH4
E. sibiricum	30	cluster30	gagccattagctcagttggtagagcatctgacttttaatcagagggtcgcaggttcgaatcctgcatggctcaccacca	LysTTT-2	17	D-loop	T	0	5.27949	612.333	47.7287	D	NaBH4
E. sibiricum	10	cluster32	ggaggcgtactcaagtggtttaagagaacggtcttgaaaaccgtcaggcggcgaaagccgtgcgtgggttcgaatcccaccgcctcctccacca	SerTGA	20	D-loop	T	0	2.42488	533.333	38.3576	D	NaBH4
E. sibiricum	10	cluster32	ggaggcgtactcaagtggtttaagagaacggtcttgaaaaccgtcaggcggcgaaagccgtgcgtgggttcgaatcccaccgcctcctccacca	SerTGA	20a	D-loop	T	0	1.95655	432.667	23.8202	D	NaBH4
E. sibiricum	20	cluster32	ggaggcgtactcaagtggtttaagagaacggtcttgaaaaccgtcaggcggcgaaagccgtgcgtgggttcgaatcccaccgcctcctccacca	SerTGA	20	D-loop	T	0	3.17571	1331.33	61.5569	D	NaBH4
E. sibiricum	20	cluster32	ggaggcgtactcaagtggtttaagagaacggtcttgaaaaccgtcaggcggcgaaagccgtgcgtgggttcgaatcccaccgcctcctccacca	SerTGA	20a	D-loop	T	0	3.58779	1050.33	32.5805	D	NaBH4
E. sibiricum	20	cluster32	ggaggcgtactcaagtggtttaagagaacggtcttgaaaaccgtcaggcggcgaaagccgtgcgtgggttcgaatcccaccgcctcctccacca	SerTGA	20b	D-loop	T	0.00635269	1.27927	84.3333	2.56184	D	NaBH4
E. sibiricum	30	cluster32	ggaggcgtactcaagtggtttaagagaacggtcttgaaaaccgtcaggcggcgaaagccgtgcgtgggttcgaatcccaccgcctcctccacca	SerTGA	20	D-loop	T	0	3.34649	988	76.029	D	NaBH4
E. sibiricum	30	cluster32	ggaggcgtactcaagtggtttaagagaacggtcttgaaaaccgtcaggcggcgaaagccgtgcgtgggttcgaatcccaccgcctcctccacca	SerTGA	20a	D-loop	T	0	3.93928	794.333	37.8969	D	NaBH4
E. sibiricum	10	cluster33	ggaggattagctcagctgggagagcatctgccttacaagcagagggtcggcggttcgatcccgtcatcctccaccacca	ValTAC	47	V-region	T	0	2.5582	514.667	2.91941	D	NaBH4
E. sibiricum	20	cluster33	ggaggattagctcagctgggagagcatctgccttacaagcagagggtcggcggttcgatcccgtcatcctccaccacca	ValTAC	17	D-loop	T	0	2.58829	471.667	8.84361	D	NaBH4
E. sibiricum	20	cluster33	ggaggattagctcagctgggagagcatctgccttacaagcagagggtcggcggttcgatcccgtcatcctccaccacca	ValTAC	47	V-region	T	0	3.24211	289	2.11081	D	NaBH4
E. sibiricum	30	cluster33	ggaggattagctcagctgggagagcatctgccttacaagcagagggtcggcggttcgatcccgtcatcctccaccacca	ValTAC	17	D-loop	T	0	2.4692	508.667	10.6202	D	NaBH4
E. sibiricum	30	cluster33	ggaggattagctcagctgggagagcatctgccttacaagcagagggtcggcggttcgatcccgtcatcctccaccacca	ValTAC	47	V-region	T	0	3.36052	402.667	2.48694	D	NaBH4
E. sibiricum	10	cluster34	gccggtgtggcggaactggtagacgcgcacgactcaaaatcgtgttcctttggagtgtcggttcgattccgaccaccggtaccacca	LeuCAA	17	D-loop	T	0	3.24403	485	47.8509	D	NaBH4
E. sibiricum	10	cluster34	gccggtgtggcggaactggtagacgcgcacgactcaaaatcgtgttcctttggagtgtcggttcgattccgaccaccggtaccacca	LeuCAA	20	D-loop	T	0	4.95277	4066.67	79.4743	D	NaBH4
E. sibiricum	20	cluster34	gccggtgtggcggaactggtagacgcgcacgactcaaaatcgtgttcctttggagtgtcggttcgattccgaccaccggtaccacca	LeuCAA	20	D-loop	T	0	5.58132	4207.67	57.2171	D	NaBH4
E. sibiricum	20	cluster34	gccggtgtggcggaactggtagacgcgcacgactcaaaatcgtgttcctttggagtgtcggttcgattccgaccaccggtaccacca	LeuCAA	17	D-loop	T	0	5.41473	2182.67	68.3412	D	NaBH4
E. sibiricum	30	cluster34	gccggtgtggcggaactggtagacgcgcacgactcaaaatcgtgttcctttggagtgtcggttcgattccgaccaccggtaccacca	LeuCAA	17	D-loop	T	0	5.0833	1786.67	71.6313	D	NaBH4
E. sibiricum	30	cluster34	gccggtgtggcggaactggtagacgcgcacgactcaaaatcgtgttcctttggagtgtcggttcgattccgaccaccggtaccacca	LeuCAA	20	D-loop	T	0	6.04174	4370	62.9825	D	NaBH4
E. sibiricum	10	cluster35	gcacccgtagctcaggggatagagcactggtttccggtaccaggtgtcgggagttcaaatctctccgggtgtaccacca	ArgCCG	20a	D-loop	T	0	3.76777	420.667	25.7591	D	NaBH4
E. sibiricum	20	cluster35	gcacccgtagctcaggggatagagcactggtttccggtaccaggtgtcgggagttcaaatctctccgggtgtaccacca	ArgCCG	20a	D-loop	T	0	3.39607	230.333	21.552	D	NaBH4
E. sibiricum	30	cluster35	gcacccgtagctcaggggatagagcactggtttccggtaccaggtgtcgggagttcaaatctctccgggtgtaccacca	ArgCCG	20a	D-loop	T	0	3.57347	234	22.8494	D	NaBH4
E. sibiricum	10	cluster36	ggggccttagctcagctgggagagcgcctgccttgcacgcaggaggtcagcggttcgatcccgctaggctccaccacca	AlaTGC	17	D-loop	T	0	1.8012	546.667	8.34815	D	NaBH4
E. sibiricum	10	cluster36	ggggccttagctcagctgggagagcgcctgccttgcacgcaggaggtcagcggttcgatcccgctaggctccaccacca	AlaTGC	47	V-region	T	0	3.29015	728.333	3.0954	D	NaBH4
E. sibiricum	20	cluster36	ggggccttagctcagctgggagagcgcctgccttgcacgcaggaggtcagcggttcgatcccgctaggctccaccacca	AlaTGC	17	D-loop	T	0	2.49503	500.333	5.57115	D	NaBH4
E. sibiricum	30	cluster36	ggggccttagctcagctgggagagcgcctgccttgcacgcaggaggtcagcggttcgatcccgctaggctccaccacca	AlaTGC	17	D-loop	T	0	2.76863	778.333	8.23066	D	NaBH4
E. sibiricum	30	cluster36	ggggccttagctcagctgggagagcgcctgccttgcacgcaggaggtcagcggttcgatcccgctaggctccaccacca	AlaTGC	47	V-region	T	0	4.16948	747.333	2.26691	D	NaBH4
E. sibiricum	10	cluster37	gattctgtagctcagctgggagagcgctaccttgacagggtagaggtcgctggttcgagcccagtcagaatcaccacca	ValGAC	17	D-loop	T	0	1.66127	519	8.57026	D	NaBH4
E. sibiricum	10	cluster37	gattctgtagctcagctgggagagcgctaccttgacagggtagaggtcgctggttcgagcccagtcagaatcaccacca	ValGAC	47	V-region	T	0	2.41286	502.667	2.60702	D	NaBH4
E. sibiricum	20	cluster37	gattctgtagctcagctgggagagcgctaccttgacagggtagaggtcgctggttcgagcccagtcagaatcaccacca	ValGAC	17	D-loop	T	0	2.64241	623.667	9.84253	D	NaBH4
E. sibiricum	30	cluster37	gattctgtagctcagctgggagagcgctaccttgacagggtagaggtcgctggttcgagcccagtcagaatcaccacca	ValGAC	17	D-loop	T	0	2.66076	740	10.9407	D	NaBH4
E. sibiricum	30	cluster37	gattctgtagctcagctgggagagcgctaccttgacagggtagaggtcgctggttcgagcccagtcagaatcaccacca	ValGAC	47	V-region	T	0	3.01134	523.333	2.05353	D	NaBH4
E. sibiricum	10	cluster38	ggcgccatagccaagtggtaaggcagaggactgcaactcctctatcgtcagttcgattctgactggcgcctccacca	CysGCA	20	D-loop	T	2.46658452578289e-09	1.90275	198	16.406	D	NaBH4
E. sibiricum	10	cluster38	ggcgccatagccaagtggtaaggcagaggactgcaactcctctatcgtcagttcgattctgactggcgcctccacca	CysGCA	16	D-loop	T	0.00365741	1.35366	58	6.49346	D	NaBH4
E. sibiricum	20	cluster38	ggcgccatagccaagtggtaaggcagaggactgcaactcctctatcgtcagttcgattctgactggcgcctccacca	CysGCA	20	D-loop	T	0	2.77341	528.667	16.0505	D	NaBH4
E. sibiricum	20	cluster38	ggcgccatagccaagtggtaaggcagaggactgcaactcctctatcgtcagttcgattctgactggcgcctccacca	CysGCA	16	D-loop	T	3.66243936336355e-06	1.84258	93.3333	4.10026	D	NaBH4
E. sibiricum	30	cluster38	ggcgccatagccaagtggtaaggcagaggactgcaactcctctatcgtcagttcgattctgactggcgcctccacca	CysGCA	20	D-loop	T	0	3.11513	656.667	21.4249	D	NaBH4
E. sibiricum	30	cluster38	ggcgccatagccaagtggtaaggcagaggactgcaactcctctatcgtcagttcgattctgactggcgcctccacca	CysGCA	16	D-loop	T	3.27320349312585e-07	2.06674	112	5.57091	D	NaBH4
E. sibiricum	10	cluster39	gcgggtgtagtttagtggtaaaacctcagccttccaagctgatgatgagggttcgattcccttcacccgctccacca	GlyTCC-2	20	D-loop	T	0	3.50261	1504.67	71.1146	D	NaBH4
E. sibiricum	20	cluster39	gcgggtgtagtttagtggtaaaacctcagccttccaagctgatgatgagggttcgattcccttcacccgctccacca	GlyTCC-2	20	D-loop	T	0	4.92777	3151.33	69.681	D	NaBH4
E. sibiricum	30	cluster39	gcgggtgtagtttagtggtaaaacctcagccttccaagctgatgatgagggttcgattcccttcacccgctccacca	GlyTCC-2	20	D-loop	T	0	4.92584	3919	73.8354	D	NaBH4
E. sibiricum	10	cluster4	ggcccgttggtcaagcggttaagacaccgccctttcacggcggtatcacgggttcgattcccgtacgggtcaccacca	GluTTC-2	20a	D-loop	T	0	4.99568	14459.3	57.4819	D	NaBH4
E. sibiricum	10	cluster4	ggcccgttggtcaagcggttaagacaccgccctttcacggcggtatcacgggttcgattcccgtacgggtcaccacca	GluTTC-2	20	D-loop	T	0	1.57198	8379	78.9203	D	NaBH4
E. sibiricum	20	cluster4	ggcccgttggtcaagcggttaagacaccgccctttcacggcggtatcacgggttcgattcccgtacgggtcaccacca	GluTTC-2	20a	D-loop	T	0	5.75206	17998	68.3393	D	NaBH4
E. sibiricum	30	cluster4	ggcccgttggtcaagcggttaagacaccgccctttcacggcggtatcacgggttcgattcccgtacgggtcaccacca	GluTTC-2	20a	D-loop	T	0	5.95808	15688.7	71.7063	D	NaBH4
E. sibiricum	30	cluster4	ggcccgttggtcaagcggttaagacaccgccctttcacggcggtatcacgggttcgattcccgtacgggtcaccacca	GluTTC-2	20	D-loop	T	0	1.00277	4932.33	79.7233	D	NaBH4
E. sibiricum	10	cluster5	gcgggtgtagtttagtggtaaaacctcagccttccaagctgatgatgagagttcgattctcttcacccgctccacca	GlyTCC-1	20	D-loop	T	0	3.31354	2266.33	71.3841	D	NaBH4
E. sibiricum	20	cluster5	gcgggtgtagtttagtggtaaaacctcagccttccaagctgatgatgagagttcgattctcttcacccgctccacca	GlyTCC-1	20	D-loop	T	0	4.55493	3765.67	69.4558	D	NaBH4
E. sibiricum	30	cluster5	gcgggtgtagtttagtggtaaaacctcagccttccaagctgatgatgagagttcgattctcttcacccgctccacca	GlyTCC-1	20	D-loop	T	0	4.69042	5380	73.9689	D	NaBH4
E. sibiricum	10	cluster6	gtcgtcgtggcggaactggtagacgcgctagactcagaatctagtggtggcaacaccgtggaggttcaagtcctctcggcggcaccacca	LeuCAG	20	D-loop	T	0	5.00643	1468.33	81.5039	D	NaBH4
E. sibiricum	10	cluster6	gtcgtcgtggcggaactggtagacgcgctagactcagaatctagtggtggcaacaccgtggaggttcaagtcctctcggcggcaccacca	LeuCAG	17	D-loop	T	4.16270732643367e-12	2.50772	129.667	41.4232	D	NaBH4
E. sibiricum	20	cluster6	gtcgtcgtggcggaactggtagacgcgctagactcagaatctagtggtggcaacaccgtggaggttcaagtcctctcggcggcaccacca	LeuCAG	20	D-loop	T	0	5.42005	1198	73.3516	D	NaBH4
E. sibiricum	20	cluster6	gtcgtcgtggcggaactggtagacgcgctagactcagaatctagtggtggcaacaccgtggaggttcaagtcctctcggcggcaccacca	LeuCAG	17	D-loop	T	0	3.13652	192.667	44.4577	D	NaBH4
E. sibiricum	30	cluster6	gtcgtcgtggcggaactggtagacgcgctagactcagaatctagtggtggcaacaccgtggaggttcaagtcctctcggcggcaccacca	LeuCAG	20	D-loop	T	0	5.34915	1153.67	78.2105	D	NaBH4
E. sibiricum	30	cluster6	gtcgtcgtggcggaactggtagacgcgctagactcagaatctagtggtggcaacaccgtggaggttcaagtcctctcggcggcaccacca	LeuCAG	17	D-loop	T	1.86315904952468e-14	2.82802	147	49.3388	D	NaBH4
E. sibiricum	10	cluster7	ggcggtgtagctcagctggctagagcgtacggttcatacccgtgaggtcgtgggttcgactccctccgccgctaccacca	MetCAT-1	47	V-region	T	9.96274909888596e-06	1.29838	190	3.16636	D	NaBH4
E. sibiricum	10	cluster7	ggcggtgtagctcagctggctagagcgtacggttcatacccgtgaggtcgtgggttcgactccctccgccgctaccacca	MetCAT-1	20a	D-loop	T	2.69126830065111e-10	1.81302	256.667	23.4658	D	NaBH4
E. sibiricum	10	cluster7	ggcggtgtagctcagctggctagagcgtacggttcatacccgtgaggtcgtgggttcgactccctccgccgctaccacca	MetCAT-1	17	D-loop	T	0	3.00666	349.333	49.9275	D	NaBH4
E. sibiricum	20	cluster7	ggcggtgtagctcagctggctagagcgtacggttcatacccgtgaggtcgtgggttcgactccctccgccgctaccacca	MetCAT-1	17	D-loop	T	0	4.47681	635.667	69.5716	D	NaBH4
E. sibiricum	20	cluster7	ggcggtgtagctcagctggctagagcgtacggttcatacccgtgaggtcgtgggttcgactccctccgccgctaccacca	MetCAT-1	20a	D-loop	T	0	2.95957	182	16.0599	D	NaBH4
E. sibiricum	30	cluster7	ggcggtgtagctcagctggctagagcgtacggttcatacccgtgaggtcgtgggttcgactccctccgccgctaccacca	MetCAT-1	20a	D-loop	T	0	3.36298	232.333	24.1443	D	NaBH4
E. sibiricum	30	cluster7	ggcggtgtagctcagctggctagagcgtacggttcatacccgtgaggtcgtgggttcgactccctccgccgctaccacca	MetCAT-1	17	D-loop	T	0	4.30554	470.667	69.9913	D	NaBH4
E. sibiricum	10	cluster8	gggggcttagctcagctgggagagcgtttggctggcagccaaaaggtcgtcggttcgagcccgatagtctccaccacca	AlaGGC	17	D-loop	T	0.000838424	1.43829	105	8.77031	D	NaBH4
E. sibiricum	10	cluster8	gggggcttagctcagctgggagagcgtttggctggcagccaaaaggtcgtcggttcgagcccgatagtctccaccacca	AlaGGC	47	V-region	T	0.00459598	1.16688	100.667	2.73011	D	NaBH4
E. sibiricum	20	cluster8	gggggcttagctcagctgggagagcgtttggctggcagccaaaaggtcgtcggttcgagcccgatagtctccaccacca	AlaGGC	17	D-loop	T	2.66952760628429e-05	1.97748	62.3333	12.7993	D	NaBH4
E. sibiricum	30	cluster8	gggggcttagctcagctgggagagcgtttggctggcagccaaaaggtcgtcggttcgagcccgatagtctccaccacca	AlaGGC	17	D-loop	T	0.000192536	1.60404	49	15.4651	D	NaBH4
E. sibiricum	30	cluster8	gggggcttagctcagctgggagagcgtttggctggcagccaaaaggtcgtcggttcgagcccgatagtctccaccacca	AlaGGC	47	V-region	T	0.00741938	1.40389	34.3333	2.4578	D	NaBH4
E. sibiricum	10	cluster9	cgcggggtggagcagtctggtagctcgttgggctcataacccaaaggtcgtcggttcaaatccggcccccgcaaccacca	MetCAT-2	47	V-region	T	0	2.81435	284.333	2.12067	D	NaBH4
E. sibiricum	10	cluster9	cgcggggtggagcagtctggtagctcgttgggctcataacccaaaggtcgtcggttcaaatccggcccccgcaaccacca	MetCAT-2	20	D-loop	T	0	4.16093	3273	36.2922	D	NaBH4
E. sibiricum	20	cluster9	cgcggggtggagcagtctggtagctcgttgggctcataacccaaaggtcgtcggttcaaatccggcccccgcaaccacca	MetCAT-2	20	D-loop	T	0	5.34295	3860.33	25.7994	D	NaBH4
E. sibiricum	30	cluster9	cgcggggtggagcagtctggtagctcgttgggctcataacccaaaggtcgtcggttcaaatccggcccccgcaaccacca	MetCAT-2	20	D-loop	T	0	5.82417	4104.67	33.8673	D	NaBH4

## Sheet: B. subtilis
Species	Temperature	Cluster ID	tRNA sequence	Anticodon	tRNA position	tRNA area	REF	adj. P value	Fold change	# RTs	% RTs	Modification	Treatment
B. subtilis	20	cluster11	gcggttgtggcgaagtggttaacgcaccagattgtggctctggcactcgtgggttcgattcccatcaatcgccccacca	HisGTG-1	8	after 5' ACC-stem	T	0	4.0678	262	39.8741	s4U	NaBH4
B. subtilis	30	cluster11	gcggttgtggcgaagtggttaacgcaccagattgtggctctggcactcgtgggttcgattcccatcaatcgccccacca	HisGTG-1	8	after 5' ACC-stem	T	0	3.91751	421.667	56.7363	s4U	NaBH4
B. subtilis	37	cluster11	gcggttgtggcgaagtggttaacgcaccagattgtggctctggcactcgtgggttcgattcccatcaatcgccccacca	HisGTG-1	8	after 5' ACC-stem	T	3.41443540108344e-13	2.83373	133.333	47.3292	s4U	NaBH4
B. subtilis	37	cluster12	ggggccttagctcagctgggagagcgcctgctttgcacgcaggaggtcagcggttcgatcccgctaggctccaccacca	AlaTGC	8	after 5' ACC-stem	T	1.84100443469918e-08	2.45703	96	2.2606	s4U	NaBH4
B. subtilis	30	cluster29	ggaggattagctcagctgggagagcatctgccttacaagcagagggtcggcggttcgagcccgtcatcctccaccacca	ValTAC	8	after 5' ACC-stem	T	0.000264441	1.39473	147.333	3.70667	s4U	NaBH4
B. subtilis	20	cluster37	tgggctatagccaagcggtaaggcaacggactttgactccgtcatgcgttggttcgaatccagctagcccagccacca	GlnTTG-2	8	after 5' ACC-stem	T	0	1.65179	502.667	12.9461	s4U	NaBH4
B. subtilis	20	cluster5	gcggttgtggcgaagtggttaacgcaccagattgtggctctggcattcgtgggttcgattcccatcaatcgccccacca	HisGTG-2	8	after 5' ACC-stem	T	0	4.39917	250.333	40.9899	s4U	NaBH4
B. subtilis	30	cluster5	gcggttgtggcgaagtggttaacgcaccagattgtggctctggcattcgtgggttcgattcccatcaatcgccccacca	HisGTG-2	8	after 5' ACC-stem	T	0	3.6861	423.333	55.2881	s4U	NaBH4
B. subtilis	37	cluster5	gcggttgtggcgaagtggttaacgcaccagattgtggctctggcattcgtgggttcgattcccatcaatcgccccacca	HisGTG-2	8	after 5' ACC-stem	T	3.05815978601293e-15	2.99223	144	49.521	s4U	NaBH4
B. subtilis	20	cluster9	gcggatgtggcggaattggcagacgcgctagaatcaggctctagtgtctttacagacgtgggggttcaagtcccttcatccgcaccacca	LeuCAG	8	after 5' ACC-stem	T	0	2.8319	45.6667	8.06229	s4U	NaBH4
B. subtilis	30	cluster9	gcggatgtggcggaattggcagacgcgctagaatcaggctctagtgtctttacagacgtgggggttcaagtcccttcatccgcaccacca	LeuCAG	8	after 5' ACC-stem	T	0	1.77221	39	12.7117	s4U	NaBH4
B. subtilis	37	cluster9	gcggatgtggcggaattggcagacgcgctagaatcaggctctagtgtctttacagacgtgggggttcaagtcccttcatccgcaccacca	LeuCAG	8	after 5' ACC-stem	T	0	1.94722	27.6667	16.4187	s4U	NaBH4
B. subtilis	20	cluster1	gcggaagtagttcagtggtagaacaccaccttgccaaggtgggggtcgcgggttcgaatcccgtcttccgctccacca	GlyGCC	46	V-region	G	0	6.26234	6156.67	28.8555	m7G	NaBH4
B. subtilis	30	cluster1	gcggaagtagttcagtggtagaacaccaccttgccaaggtgggggtcgcgggttcgaatcccgtcttccgctccacca	GlyGCC	46	V-region	G	0	5.91311	16834.3	49.0426	m7G	NaBH4
B. subtilis	37	cluster1	gcggaagtagttcagtggtagaacaccaccttgccaaggtgggggtcgcgggttcgaatcccgtcttccgctccacca	GlyGCC	46	V-region	G	0	5.45144	9277	52.0593	m7G	NaBH4
B. subtilis	20	cluster12	ggggccttagctcagctgggagagcgcctgctttgcacgcaggaggtcagcggttcgatcccgctaggctccaccacca	AlaTGC	46	V-region	G	0	6.27253	3689.67	9.60471	m7G	NaBH4
B. subtilis	30	cluster12	ggggccttagctcagctgggagagcgcctgctttgcacgcaggaggtcagcggttcgatcccgctaggctccaccacca	AlaTGC	46	V-region	G	0	6.50453	8956	27.3023	m7G	NaBH4
B. subtilis	37	cluster12	ggggccttagctcagctgggagagcgcctgctttgcacgcaggaggtcagcggttcgatcccgctaggctccaccacca	AlaTGC	46	V-region	G	0	6.55367	5641.33	34.023	m7G	NaBH4
B. subtilis	20	cluster13	gggcctgtagctcagctggttagagcgcacgcctgataagcgtgaggtcggtggttcgagtccactcaggcccaccacca	IleGAT-1	46	V-region	G	0	5.19729	1361.67	4.63421	m7G	NaBH4
B. subtilis	30	cluster13	gggcctgtagctcagctggttagagcgcacgcctgataagcgtgaggtcggtggttcgagtccactcaggcccaccacca	IleGAT-1	46	V-region	G	0	4.76435	3796.33	5.6019	m7G	NaBH4
B. subtilis	37	cluster13	gggcctgtagctcagctggttagagcgcacgcctgataagcgtgaggtcggtggttcgagtccactcaggcccaccacca	IleGAT-1	46	V-region	G	0	4.56996	2850.33	7.06777	m7G	NaBH4
B. subtilis	20	cluster14	gtcccagtagctcagctggatagagcaacggccttctaagccgtcggtcgggagttcgaatctctcctgggacgccacca	ArgTCT	46	V-region	G	0	5.82692	1325	15.8248	m7G	NaBH4
B. subtilis	30	cluster14	gtcccagtagctcagctggatagagcaacggccttctaagccgtcggtcgggagttcgaatctctcctgggacgccacca	ArgTCT	46	V-region	G	0	5.04006	2718.33	25.4705	m7G	NaBH4
B. subtilis	37	cluster14	gtcccagtagctcagctggatagagcaacggccttctaagccgtcggtcgggagttcgaatctctcctgggacgccacca	ArgTCT	46	V-region	G	0	4.34078	2024.33	29.3132	m7G	NaBH4
B. subtilis	37	cluster15	aggggcatagtttaacggtagaacagaggtctccaaaacctccggtgtgggttcgattcctactgcccctgccacca	TrpCCA	46	V-region	G	0.00017706	1.46703	61.3333	2.03944	m7G	NaBH4
B. subtilis	20	cluster16	cgcggggtggagcagttcggtagctcgtcgggctcataacccgaaggtcgcaggttcaaatcctgcccccgcaaccacca	MetCAT-1	46	V-region	G	0	3.88079	532.667	2.8988	m7G	NaBH4
B. subtilis	30	cluster16	cgcggggtggagcagttcggtagctcgtcgggctcataacccgaaggtcgcaggttcaaatcctgcccccgcaaccacca	MetCAT-1	46	V-region	G	0	4.37554	2112	10.8808	m7G	NaBH4
B. subtilis	37	cluster16	cgcggggtggagcagttcggtagctcgtcgggctcataacccgaaggtcgcaggttcaaatcctgcccccgcaaccacca	MetCAT-1	46	V-region	G	0	4.52599	1328.33	11.7964	m7G	NaBH4
B. subtilis	20	cluster17	gcttccatagctcagcaggtagagcacttccatggtaaggaagaggtcagcggttcgagcccgcttggaagctccacca	ThrGGT	46	V-region	G	0	4.32902	244.333	7.03363	m7G	NaBH4
B. subtilis	30	cluster17	gcttccatagctcagcaggtagagcacttccatggtaaggaagaggtcagcggttcgagcccgcttggaagctccacca	ThrGGT	46	V-region	G	0	4.23897	472.333	15.8426	m7G	NaBH4
B. subtilis	37	cluster17	gcttccatagctcagcaggtagagcacttccatggtaaggaagaggtcagcggttcgagcccgcttggaagctccacca	ThrGGT	46	V-region	G	0	4.75492	488	22.5572	m7G	NaBH4
B. subtilis	20	cluster18	gcgctcgtagctcagttggatagagcggtggtttccggtaccacgtctgtcgggggttcgaatccctccgagcgcgccacca	ArgCCG	46	V-region	G	0	3.3219	211.667	2.45086	m7G	NaBH4
B. subtilis	30	cluster18	gcgctcgtagctcagttggatagagcggtggtttccggtaccacgtctgtcgggggttcgaatccctccgagcgcgccacca	ArgCCG	46	V-region	G	0	4.21733	751.333	8.52295	m7G	NaBH4
B. subtilis	37	cluster18	gcgctcgtagctcagttggatagagcggtggtttccggtaccacgtctgtcgggggttcgaatccctccgagcgcgccacca	ArgCCG	46	V-region	G	0	4.79288	846.667	12.0193	m7G	NaBH4
B. subtilis	20	cluster19	gcgcccgtagctcaattggatagagcgtttgactacggatcaaaaggttaggggttcgactcctctcgggcgcgccacca	ArgACG	46	V-region	G	0	5.4941	6198.67	12.9225	m7G	NaBH4
B. subtilis	30	cluster19	gcgcccgtagctcaattggatagagcgtttgactacggatcaaaaggttaggggttcgactcctctcgggcgcgccacca	ArgACG	46	V-region	G	0	5.79033	10163.3	25.3334	m7G	NaBH4
B. subtilis	37	cluster19	gcgcccgtagctcaattggatagagcgtttgactacggatcaaaaggttaggggttcgactcctctcgggcgcgccacca	ArgACG	46	V-region	G	0	5.91455	7361	28.0026	m7G	NaBH4
B. subtilis	20	cluster23	ggtccggtagttcagttggttagaatgcctgcctgtcacgcaggaggtcgcgggttcgagtcccgtccggaccgccacca	AspGTC	46	V-region	G	0	6.3568	3833	9.79668	m7G	NaBH4
B. subtilis	30	cluster23	ggtccggtagttcagttggttagaatgcctgcctgtcacgcaggaggtcgcgggttcgagtcccgtccggaccgccacca	AspGTC	46	V-region	G	0	5.90731	6471.33	14.6	m7G	NaBH4
B. subtilis	37	cluster23	ggtccggtagttcagttggttagaatgcctgcctgtcacgcaggaggtcgcgggttcgagtcccgtccggaccgccacca	AspGTC	46	V-region	G	0	5.4617	5585.67	17.9673	m7G	NaBH4
B. subtilis	20	cluster27	ggggccatagctcagctgggagagcgctacgctggcagcgtagaggtcaggggttcgagcccccttggctccaccacca	AlaGGC	46	V-region	G	0	4.64332	551	13.2854	m7G	NaBH4
B. subtilis	30	cluster27	ggggccatagctcagctgggagagcgctacgctggcagcgtagaggtcaggggttcgagcccccttggctccaccacca	AlaGGC	46	V-region	G	0	5.31454	1777.33	24.1875	m7G	NaBH4
B. subtilis	37	cluster27	ggggccatagctcagctgggagagcgctacgctggcagcgtagaggtcaggggttcgagcccccttggctccaccacca	AlaGGC	46	V-region	G	0	5.82739	1734.67	36.3041	m7G	NaBH4
B. subtilis	20	cluster28	gggcctgtagctcagctggttagagcgcacgcctgataagcgtgaggtcgatggttcgagtccattcaggcccaccacca	IleGAT-2	46	V-region	G	0	5.26477	586	7.19723	m7G	NaBH4
B. subtilis	30	cluster28	gggcctgtagctcagctggttagagcgcacgcctgataagcgtgaggtcgatggttcgagtccattcaggcccaccacca	IleGAT-2	46	V-region	G	0	4.89063	1331.33	9.61047	m7G	NaBH4
B. subtilis	37	cluster28	gggcctgtagctcagctggttagagcgcacgcctgataagcgtgaggtcgatggttcgagtccattcaggcccaccacca	IleGAT-2	46	V-region	G	0	5.22614	1168.33	11.292	m7G	NaBH4
B. subtilis	20	cluster29	ggaggattagctcagctgggagagcatctgccttacaagcagagggtcggcggttcgagcccgtcatcctccaccacca	ValTAC	46	V-region	G	0	5.03899	612.333	8.81742	m7G	NaBH4
B. subtilis	30	cluster29	ggaggattagctcagctgggagagcatctgccttacaagcagagggtcggcggttcgagcccgtcatcctccaccacca	ValTAC	46	V-region	G	0	4.90043	2379.33	16.4609	m7G	NaBH4
B. subtilis	37	cluster29	ggaggattagctcagctgggagagcatctgccttacaagcagagggtcggcggttcgagcccgtcatcctccaccacca	ValTAC	46	V-region	G	0	4.18399	1421	18.3908	m7G	NaBH4
B. subtilis	20	cluster32	ggacctttagctcagttggttagagcagacggctcataaccgtccggtcgtaggttcgagtcctacaaggtccaccacca	MetCAT-2	46	V-region	G	0	6.57292	1100.67	14.7261	m7G	NaBH4
B. subtilis	30	cluster32	ggacctttagctcagttggttagagcagacggctcataaccgtccggtcgtaggttcgagtcctacaaggtccaccacca	MetCAT-2	46	V-region	G	0	6.27215	2325	25.1023	m7G	NaBH4
B. subtilis	37	cluster32	ggacctttagctcagttggttagagcagacggctcataaccgtccggtcgtaggttcgagtcctacaaggtccaccacca	MetCAT-2	46	V-region	G	0	6.02416	1718	26.5438	m7G	NaBH4
B. subtilis	20	cluster33	tccgcagtagctcagtggtagagctatcggctgttaaccgatcggtcgtaggttcgaatcctacctgcggagccacca	AsnGTT-2	46	V-region	G	0	5.15398	3408.67	20.3164	m7G	NaBH4
B. subtilis	30	cluster33	tccgcagtagctcagtggtagagctatcggctgttaaccgatcggtcgtaggttcgaatcctacctgcggagccacca	AsnGTT-2	46	V-region	G	0	5.36708	9062	35.3787	m7G	NaBH4
B. subtilis	37	cluster33	tccgcagtagctcagtggtagagctatcggctgttaaccgatcggtcgtaggttcgaatcctacctgcggagccacca	AsnGTT-2	46	V-region	G	0	5.50634	6280	36.3153	m7G	NaBH4
B. subtilis	20	cluster35	gagccattagctcagttggtagagcatctgacttttaatcagagggtcgaaggttcgagtccttcatggctcaccacca	LysTTT	46	V-region	G	0	6.76651	4239	7.26982	m7G	NaBH4
B. subtilis	30	cluster35	gagccattagctcagttggtagagcatctgacttttaatcagagggtcgaaggttcgagtccttcatggctcaccacca	LysTTT	46	V-region	G	0	6.15565	7878.33	9.91723	m7G	NaBH4
B. subtilis	37	cluster35	gagccattagctcagttggtagagcatctgacttttaatcagagggtcgaaggttcgagtccttcatggctcaccacca	LysTTT	46	V-region	G	0	6.18615	5495.67	11.4055	m7G	NaBH4
B. subtilis	20	cluster39	ggctcggtagctcagttggtagagcaacggactgaaaatccgtgtgtcggcggttcgattccgtcccgagccaccacca	PheGAA	46	V-region	G	0	6.30644	2536	3.22888	m7G	NaBH4
B. subtilis	30	cluster39	ggctcggtagctcagttggtagagcaacggactgaaaatccgtgtgtcggcggttcgattccgtcccgagccaccacca	PheGAA	46	V-region	G	0	5.8286	8579	5.49781	m7G	NaBH4
B. subtilis	37	cluster39	ggctcggtagctcagttggtagagcaacggactgaaaatccgtgtgtcggcggttcgattccgtcccgagccaccacca	PheGAA	46	V-region	G	0	6.18355	6576	6.08451	m7G	NaBH4
B. subtilis	20	cluster4	gctctagtagcacagcggatagtgcagcagtttcctaaactgcaggtcgggagttcgaatctctcctagagcgccacca	ArgCCT	46	V-region	G	0	2.13546	31.6667	12.6963	m7G	NaBH4
B. subtilis	30	cluster4	gctctagtagcacagcggatagtgcagcagtttcctaaactgcaggtcgggagttcgaatctctcctagagcgccacca	ArgCCT	46	V-region	G	4.09537044024129e-08	2.55274	109	21.7218	m7G	NaBH4
B. subtilis	37	cluster4	gctctagtagcacagcggatagtgcagcagtttcctaaactgcaggtcgggagttcgaatctctcctagagcgccacca	ArgCCT	46	V-region	G	0	3.23144	92.3333	22.3777	m7G	NaBH4
B. subtilis	20	cluster40	gattccgtagctcagctgggagagcgctaccttgacagggtagaggtcgctggttcgagcccagtcggaatcaccacca	ValGAC	46	V-region	G	0	5.39346	432.667	10.9859	m7G	NaBH4
B. subtilis	30	cluster40	gattccgtagctcagctgggagagcgctaccttgacagggtagaggtcgctggttcgagcccagtcggaatcaccacca	ValGAC	46	V-region	G	0	5.34921	1782.67	22.8383	m7G	NaBH4
B. subtilis	37	cluster40	gattccgtagctcagctgggagagcgctaccttgacagggtagaggtcgctggttcgagcccagtcggaatcaccacca	ValGAC	46	V-region	G	0	5.04827	1142.67	27.6184	m7G	NaBH4
B. subtilis	20	cluster41	cgggaagtagctcagcttggtagagcacatggtttgggaccatggggtcgcaggttcgaatcctgtcttcccgaccacca	ProTGG	46	V-region	G	0	7.18821	2003.67	12.6256	m7G	NaBH4
B. subtilis	30	cluster41	cgggaagtagctcagcttggtagagcacatggtttgggaccatggggtcgcaggttcgaatcctgtcttcccgaccacca	ProTGG	46	V-region	G	0	6.70515	7640.33	20.4204	m7G	NaBH4
B. subtilis	37	cluster41	cgggaagtagctcagcttggtagagcacatggtttgggaccatggggtcgcaggttcgaatcctgtcttcccgaccacca	ProTGG	46	V-region	G	0	6.82806	5024	21.8774	m7G	NaBH4
B. subtilis	20	cluster42	ggcggtgtagctcagctggctagagcgtacggttcatacccgtgaggtcgggggttcgatcccctccgccgctaccacca	MetCAT-3	46	V-region	G	0	4.19399	1121	6.62704	m7G	NaBH4
B. subtilis	30	cluster42	ggcggtgtagctcagctggctagagcgtacggttcatacccgtgaggtcgggggttcgatcccctccgccgctaccacca	MetCAT-3	46	V-region	G	0	4.41273	2810	17.7511	m7G	NaBH4
B. subtilis	37	cluster42	ggcggtgtagctcagctggctagagcgtacggttcatacccgtgaggtcgggggttcgatcccctccgccgctaccacca	MetCAT-3	46	V-region	G	0	4.25114	2224	22.3627	m7G	NaBH4
B. subtilis	20	cluster6	tccacagtagctcagtggtagagctatcggctgttaaccgatcggtcgcaggttcgaatcctgcctgtggagccacca	AsnGTT-1	46	V-region	G	0	4.89654	2335.33	16.4037	m7G	NaBH4
B. subtilis	30	cluster6	tccacagtagctcagtggtagagctatcggctgttaaccgatcggtcgcaggttcgaatcctgcctgtggagccacca	AsnGTT-1	46	V-region	G	0	5.57376	6842	26.9635	m7G	NaBH4
B. subtilis	37	cluster6	tccacagtagctcagtggtagagctatcggctgttaaccgatcggtcgcaggttcgaatcctgcctgtggagccacca	AsnGTT-1	46	V-region	G	0	5.69863	4607.67	28.5798	m7G	NaBH4
B. subtilis	20	cluster8	gccggtgtagctcaattggtagagcaactgacttgtaatcagtaggttgggggttcaagtcctcttgccggcaccacca	ThrTGT	46	V-region	G	0	5.99893	4481.67	12.9536	m7G	NaBH4
B. subtilis	30	cluster8	gccggtgtagctcaattggtagagcaactgacttgtaatcagtaggttgggggttcaagtcctcttgccggcaccacca	ThrTGT	46	V-region	G	0	5.70328	5714	19.5579	m7G	NaBH4
B. subtilis	37	cluster8	gccggtgtagctcaattggtagagcaactgacttgtaatcagtaggttgggggttcaagtcctcttgccggcaccacca	ThrTGT	46	V-region	G	0	5.64864	4987.67	23.7457	m7G	NaBH4
B. subtilis	20	cluster11	gcggttgtggcgaagtggttaacgcaccagattgtggctctggcactcgtgggttcgattcccatcaatcgccccacca	HisGTG-1	23	3' D-stem	C	0	3.12256	631	11.3544	FP type II	NaBH4
B. subtilis	20	cluster11	gcggttgtggcgaagtggttaacgcaccagattgtggctctggcactcgtgggttcgattcccatcaatcgccccacca	HisGTG-1	21	D-loop	A	0	3.22432	400.667	16.6374	FP type II	NaBH4
B. subtilis	30	cluster11	gcggttgtggcgaagtggttaacgcaccagattgtggctctggcactcgtgggttcgattcccatcaatcgccccacca	HisGTG-1	23	3' D-stem	C	0	2.90816	1294.67	19.0577	FP type II	NaBH4
B. subtilis	30	cluster11	gcggttgtggcgaagtggttaacgcaccagattgtggctctggcactcgtgggttcgattcccatcaatcgccccacca	HisGTG-1	21	D-loop	A	0	2.71844	830	27.3642	FP type II	NaBH4
B. subtilis	37	cluster11	gcggttgtggcgaagtggttaacgcaccagattgtggctctggcactcgtgggttcgattcccatcaatcgccccacca	HisGTG-1	23	3' D-stem	C	0	2.65657	542	21.0432	FP type II	NaBH4
B. subtilis	37	cluster11	gcggttgtggcgaagtggttaacgcaccagattgtggctctggcactcgtgggttcgattcccatcaatcgccccacca	HisGTG-1	21	D-loop	A	0	2.89407	314.667	26.5733	FP type II	NaBH4
B. subtilis	37	cluster12	ggggccttagctcagctgggagagcgcctgctttgcacgcaggaggtcagcggttcgatcccgctaggctccaccacca	AlaTGC	13	5' D-stem	C	3.68302360293413e-07	1.88433	143.333	2.81421	FP type II	NaBH4
B. subtilis	37	cluster12	ggggccttagctcagctgggagagcgcctgctttgcacgcaggaggtcagcggttcgatcccgctaggctccaccacca	AlaTGC	44	V-region	A	1.32941354003644e-11	2.04007	200	2.02399	FP type II	NaBH4
B. subtilis	37	cluster12	ggggccttagctcagctgggagagcgcctgctttgcacgcaggaggtcagcggttcgatcccgctaggctccaccacca	AlaTGC	31	5' AC-stem	C	1.00077474151862e-05	1.29379	210	3.0699	FP type II	NaBH4
B. subtilis	37	cluster12	ggggccttagctcagctgggagagcgcctgctttgcacgcaggaggtcagcggttcgatcccgctaggctccaccacca	AlaTGC	48	V-region	C	0	3.3046	603.667	3.3735	FP type II	NaBH4
B. subtilis	20	cluster13	gggcctgtagctcagctggttagagcgcacgcctgataagcgtgaggtcggtggttcgagtccactcaggcccaccacca	IleGAT-1	31	5' AC-stem	C	0	2.08967	686.333	3.91312	FP type II	NaBH4
B. subtilis	20	cluster13	gggcctgtagctcagctggttagagcgcacgcctgataagcgtgaggtcggtggttcgagtccactcaggcccaccacca	IleGAT-1	32	AC-loop	C	0	2.09938	2439.67	11.4817	FP type II	NaBH4
B. subtilis	20	cluster13	gggcctgtagctcagctggttagagcgcacgcctgataagcgtgaggtcggtggttcgagtccactcaggcccaccacca	IleGAT-1	37	AC-loop	A	0	1.99694	1053	4.11624	FP type II	NaBH4
B. subtilis	30	cluster13	gggcctgtagctcagctggttagagcgcacgcctgataagcgtgaggtcggtggttcgagtccactcaggcccaccacca	IleGAT-1	32	AC-loop	C	0	1.79611	7990	15.4348	FP type II	NaBH4
B. subtilis	30	cluster13	gggcctgtagctcagctggttagagcgcacgcctgataagcgtgaggtcggtggttcgagtccactcaggcccaccacca	IleGAT-1	31	5' AC-stem	C	0	1.69875	2411.33	5.51035	FP type II	NaBH4
B. subtilis	30	cluster13	gggcctgtagctcagctggttagagcgcacgcctgataagcgtgaggtcggtggttcgagtccactcaggcccaccacca	IleGAT-1	37	AC-loop	A	0	1.32246	3207.33	5.31816	FP type II	NaBH4
B. subtilis	37	cluster13	gggcctgtagctcagctggttagagcgcacgcctgataagcgtgaggtcggtggttcgagtccactcaggcccaccacca	IleGAT-1	32	AC-loop	C	0	1.44695	3618	12.1554	FP type II	NaBH4
B. subtilis	37	cluster13	gggcctgtagctcagctggttagagcgcacgcctgataagcgtgaggtcggtggttcgagtccactcaggcccaccacca	IleGAT-1	31	5' AC-stem	C	0	1.49767	1216	4.60575	FP type II	NaBH4
B. subtilis	20	cluster14	gtcccagtagctcagctggatagagcaacggccttctaagccgtcggtcgggagttcgaatctctcctgggacgccacca	ArgTCT	35	AC-loop	C	1.16799401028332e-05	1.19026	139	2.64694	FP type II	NaBH4
B. subtilis	20	cluster14	gtcccagtagctcagctggatagagcaacggccttctaagccgtcggtcgggagttcgaatctctcctgggacgccacca	ArgTCT	37	AC-loop	A	0	1.80126	289	4.97667	FP type II	NaBH4
B. subtilis	37	cluster14	gtcccagtagctcagctggatagagcaacggccttctaagccgtcggtcgggagttcgaatctctcctgggacgccacca	ArgTCT	48	V-region	C	0	2.61717	207	2.96803	FP type II	NaBH4
B. subtilis	30	cluster16	cgcggggtggagcagttcggtagctcgtcgggctcataacccgaaggtcgcaggttcaaatcctgcccccgcaaccacca	MetCAT-1	56	T-loop	C	0	2.29536	601	2.84749	FP type II	NaBH4
B. subtilis	37	cluster16	cgcggggtggagcagttcggtagctcgtcgggctcataacccgaaggtcgcaggttcaaatcctgcccccgcaaccacca	MetCAT-1	32	AC-loop	C	1.53730083133793e-05	1.35346	148.667	2.08649	FP type II	NaBH4
B. subtilis	20	cluster17	gcttccatagctcagcaggtagagcacttccatggtaaggaagaggtcagcggttcgagcccgcttggaagctccacca	ThrGGT	37	AC-loop	A	1.04755112446619e-07	1.74878	137.333	5.05782	FP type II	NaBH4
B. subtilis	30	cluster18	gcgctcgtagctcagttggatagagcggtggtttccggtaccacgtctgtcgggggttcgaatccctccgagcgcgccacca	ArgCCG	11	5' D-stem	C	0	1.47019	39.3333	2.84288	FP type II	NaBH4
B. subtilis	37	cluster18	gcgctcgtagctcagttggatagagcggtggtttccggtaccacgtctgtcgggggttcgaatccctccgagcgcgccacca	ArgCCG	11	5' D-stem	C	0	1.36707	23.3333	3.10101	FP type II	NaBH4
B. subtilis	37	cluster18	gcgctcgtagctcagttggatagagcggtggtttccggtaccacgtctgtcgggggttcgaatccctccgagcgcgccacca	ArgCCG	41	3' AC-stem	C	0.00431708	1.13066	96.6667	2.09184	FP type II	NaBH4
B. subtilis	37	cluster2	gccggtgtggcggaattggcagacgcgcacgactcaaaatcgtgttccttctggagtgtcggttcgaccccgaccaccggtaccacca	LeuCAA	12e	V-region	C	0.000942457	1.25355	82.3333	2.15277	FP type II	NaBH4
B. subtilis	20	cluster20	ggcggcatagccaagtggtaaggcagaggtctgcaaaacctttatccccggttcgaatccgggtgtcgcctccacca	CysGCA	21	D-loop	A	0	2.10715	207.667	6.15603	FP type II	NaBH4
B. subtilis	30	cluster20	ggcggcatagccaagtggtaaggcagaggtctgcaaaacctttatccccggttcgaatccgggtgtcgcctccacca	CysGCA	21	D-loop	A	2.42678081930867e-11	2.18467	278.333	11.3071	FP type II	NaBH4
B. subtilis	37	cluster20	ggcggcatagccaagtggtaaggcagaggtctgcaaaacctttatccccggttcgaatccgggtgtcgcctccacca	CysGCA	21	D-loop	A	2.7373934035602e-09	2.11513	122.667	13.7455	FP type II	NaBH4
B. subtilis	20	cluster23	ggtccggtagttcagttggttagaatgcctgcctgtcacgcaggaggtcgcgggttcgagtcccgtccggaccgccacca	AspGTC	14	D-loop	A	2.97545101670094e-08	1.6399	128.667	7.09083	FP type II	NaBH4
B. subtilis	20	cluster24	gcggtcgtggcggaatggcagacgcgctaggttgagggcctagtgggtgaataacccgtggaggttcaagtcctctcggccgcaccacca	LeuGAG	15	D-loop	A	2.44973123911855e-14	2.77732	91.6667	10.6208	FP type II	NaBH4
B. subtilis	30	cluster24	gcggtcgtggcggaatggcagacgcgctaggttgagggcctagtgggtgaataacccgtggaggttcaagtcctctcggccgcaccacca	LeuGAG	15	D-loop	A	2.59457466183304e-06	1.91677	149.667	27.1106	FP type II	NaBH4
B. subtilis	20	cluster26	ggagaagtactcaagtggctgaagaggcgcccctgctaagggtgtaggtcgcgtaagcggcgcgagggttcaaatccctccttctccgccacca	SerGCT-1	20	D-loop	C	2.12840011198246e-09	2.33786	90.6667	5.93831	FP type II	NaBH4
B. subtilis	20	cluster26	ggagaagtactcaagtggctgaagaggcgcccctgctaagggtgtaggtcgcgtaagcggcgcgagggttcaaatccctccttctccgccacca	SerGCT-1	37	AC-loop	A	2.30529769333901e-10	2.11025	102	2.73657	FP type II	NaBH4
B. subtilis	30	cluster26	ggagaagtactcaagtggctgaagaggcgcccctgctaagggtgtaggtcgcgtaagcggcgcgagggttcaaatccctccttctccgccacca	SerGCT-1	20	D-loop	C	4.88139573055753e-07	2.15325	168.333	25.3921	FP type II	NaBH4
B. subtilis	30	cluster26	ggagaagtactcaagtggctgaagaggcgcccctgctaagggtgtaggtcgcgtaagcggcgcgagggttcaaatccctccttctccgccacca	SerGCT-1	37	AC-loop	A	1.15023721663119e-13	2.43137	246	5.71293	FP type II	NaBH4
B. subtilis	37	cluster26	ggagaagtactcaagtggctgaagaggcgcccctgctaagggtgtaggtcgcgtaagcggcgcgagggttcaaatccctccttctccgccacca	SerGCT-1	20	D-loop	C	3.37581300489416e-05	1.6093	69	8.17894	FP type II	NaBH4
B. subtilis	37	cluster26	ggagaagtactcaagtggctgaagaggcgcccctgctaagggtgtaggtcgcgtaagcggcgcgagggttcaaatccctccttctccgccacca	SerGCT-1	37	AC-loop	A	0.00170315	1.21266	105.333	3.85494	FP type II	NaBH4
B. subtilis	30	cluster27	ggggccatagctcagctgggagagcgctacgctggcagcgtagaggtcaggggttcgagcccccttggctccaccacca	AlaGGC	48	V-region	C	1.59604664123529e-08	2.27942	157.667	2.06064	FP type II	NaBH4
B. subtilis	30	cluster27	ggggccatagctcagctgggagagcgctacgctggcagcgtagaggtcaggggttcgagcccccttggctccaccacca	AlaGGC	61	3' T-stem	C	0	4.52301	280	3.81196	FP type II	NaBH4
B. subtilis	30	cluster27	ggggccatagctcagctgggagagcgctacgctggcagcgtagaggtcaggggttcgagcccccttggctccaccacca	AlaGGC	13	5' D-stem	C	0.00186868	1.33355	59	2.0845	FP type II	NaBH4
B. subtilis	37	cluster27	ggggccatagctcagctgggagagcgctacgctggcagcgtagaggtcaggggttcgagcccccttggctccaccacca	AlaGGC	48	V-region	C	8.97394927853804e-13	2.33527	192.333	3.66673	FP type II	NaBH4
B. subtilis	37	cluster27	ggggccatagctcagctgggagagcgctacgctggcagcgtagaggtcaggggttcgagcccccttggctccaccacca	AlaGGC	39	3' AC-stem	C	2.3212002941222e-11	2.63434	85.6667	3.88903	FP type II	NaBH4
B. subtilis	37	cluster27	ggggccatagctcagctgggagagcgctacgctggcagcgtagaggtcaggggttcgagcccccttggctccaccacca	AlaGGC	13	5' D-stem	C	0.00098891	1.49558	76.3333	6.09381	FP type II	NaBH4
B. subtilis	37	cluster27	ggggccatagctcagctgggagagcgctacgctggcagcgtagaggtcaggggttcgagcccccttggctccaccacca	AlaGGC	37	AC-loop	A	4.01787349632379e-09	2.8798	71.6667	3.47882	FP type II	NaBH4
B. subtilis	20	cluster28	gggcctgtagctcagctggttagagcgcacgcctgataagcgtgaggtcgatggttcgagtccattcaggcccaccacca	IleGAT-2	37	AC-loop	A	0	1.84783	338.667	4.98974	FP type II	NaBH4
B. subtilis	20	cluster28	gggcctgtagctcagctggttagagcgcacgcctgataagcgtgaggtcgatggttcgagtccattcaggcccaccacca	IleGAT-2	32	AC-loop	C	0	1.5587	507	8.92064	FP type II	NaBH4
B. subtilis	20	cluster28	gggcctgtagctcagctggttagagcgcacgcctgataagcgtgaggtcgatggttcgagtccattcaggcccaccacca	IleGAT-2	31	5' AC-stem	C	6.42012900780267e-10	1.70787	164	3.36612	FP type II	NaBH4
B. subtilis	30	cluster28	gggcctgtagctcagctggttagagcgcacgcctgataagcgtgaggtcgatggttcgagtccattcaggcccaccacca	IleGAT-2	32	AC-loop	C	0	1.44212	1228	12.1081	FP type II	NaBH4
B. subtilis	30	cluster28	gggcctgtagctcagctggttagagcgcacgcctgataagcgtgaggtcgatggttcgagtccattcaggcccaccacca	IleGAT-2	37	AC-loop	A	4.59731238878875e-12	1.27114	790.667	6.71966	FP type II	NaBH4
B. subtilis	30	cluster28	gggcctgtagctcagctggttagagcgcacgcctgataagcgtgaggtcgatggttcgagtccattcaggcccaccacca	IleGAT-2	31	5' AC-stem	C	7.18993742213528e-09	1.59242	385.667	4.32676	FP type II	NaBH4
B. subtilis	37	cluster28	gggcctgtagctcagctggttagagcgcacgcctgataagcgtgaggtcgatggttcgagtccattcaggcccaccacca	IleGAT-2	37	AC-loop	A	3.22890704073199e-13	1.1801	652.333	7.88235	FP type II	NaBH4
B. subtilis	37	cluster28	gggcctgtagctcagctggttagagcgcacgcctgataagcgtgaggtcgatggttcgagtccattcaggcccaccacca	IleGAT-2	31	5' AC-stem	C	5.04192711363564e-08	1.35808	260	4.00122	FP type II	NaBH4
B. subtilis	30	cluster29	ggaggattagctcagctgggagagcatctgccttacaagcagagggtcggcggttcgagcccgtcatcctccaccacca	ValTAC	48	V-region	C	0	2.95891	322.667	2.10706	FP type II	NaBH4
B. subtilis	30	cluster29	ggaggattagctcagctgggagagcatctgccttacaagcagagggtcggcggttcgagcccgtcatcctccaccacca	ValTAC	32	AC-loop	C	0.00298287	1.0016	175.667	2.14782	FP type II	NaBH4
B. subtilis	37	cluster29	ggaggattagctcagctgggagagcatctgccttacaagcagagggtcggcggttcgagcccgtcatcctccaccacca	ValTAC	11	5' D-stem	C	0.00192114	1.49576	39	2.90375	FP type II	NaBH4
B. subtilis	37	cluster29	ggaggattagctcagctgggagagcatctgccttacaagcagagggtcggcggttcgagcccgtcatcctccaccacca	ValTAC	48	V-region	C	0	2.91037	244	3.02254	FP type II	NaBH4
B. subtilis	37	cluster29	ggaggattagctcagctgggagagcatctgccttacaagcagagggtcggcggttcgagcccgtcatcctccaccacca	ValTAC	32	AC-loop	C	0.00209959	1.04817	120.333	3.53179	FP type II	NaBH4
B. subtilis	20	cluster33	tccgcagtagctcagtggtagagctatcggctgttaaccgatcggtcgtaggttcgaatcctacctgcggagccacca	AsnGTT-2	37	AC-loop	A	0	1.65138	406.333	3.66715	FP type II	NaBH4
B. subtilis	20	cluster35	gagccattagctcagttggtagagcatctgacttttaatcagagggtcgaaggttcgagtccttcatggctcaccacca	LysTTT	32	AC-loop	C	0.00015249	1.52422	41	2.35724	FP type II	NaBH4
B. subtilis	20	cluster35	gagccattagctcagttggtagagcatctgacttttaatcagagggtcgaaggttcgagtccttcatggctcaccacca	LysTTT	13	5' D-stem	C	3.95183611402915e-06	2.60643	38.6667	9.38808	FP type II	NaBH4
B. subtilis	30	cluster35	gagccattagctcagttggtagagcatctgacttttaatcagagggtcgaaggttcgagtccttcatggctcaccacca	LysTTT	13	5' D-stem	C	4.30059640653209e-06	2.39025	88	20.4837	FP type II	NaBH4
B. subtilis	37	cluster35	gagccattagctcagttggtagagcatctgacttttaatcagagggtcgaaggttcgagtccttcatggctcaccacca	LysTTT	13	5' D-stem	C	4.98593754610851e-07	2.60754	63.3333	28.4392	FP type II	NaBH4
B. subtilis	37	cluster35	gagccattagctcagttggtagagcatctgacttttaatcagagggtcgaaggttcgagtccttcatggctcaccacca	LysTTT	32	AC-loop	C	0.00341369	1.16955	62	5.44541	FP type II	NaBH4
B. subtilis	20	cluster36	gcgggtgtggcggaattggcagacgcgctagacttaggatctagtgtctttatgacgtgggggttcaagtcccttcacccgcaccacca	LeuTAG-2	15	D-loop	A	4.91819892553392e-11	1.77665	186.333	19.4834	FP type II	NaBH4
B. subtilis	30	cluster36	gcgggtgtggcggaattggcagacgcgctagacttaggatctagtgtctttatgacgtgggggttcaagtcccttcacccgcaccacca	LeuTAG-2	15	D-loop	A	0.000198794	1.35358	187.667	41.0358	FP type II	NaBH4
B. subtilis	37	cluster36	gcgggtgtggcggaattggcagacgcgctagacttaggatctagtgtctttatgacgtgggggttcaagtcccttcacccgcaccacca	LeuTAG-2	15	D-loop	A	5.72525503841118e-05	1.41272	122.667	42.4288	FP type II	NaBH4
B. subtilis	37	cluster36	gcgggtgtggcggaattggcagacgcgctagacttaggatctagtgtctttatgacgtgggggttcaagtcccttcacccgcaccacca	LeuTAG-2	4e	V-region	A	0.00331457	1.00317	141.667	2.28067	FP type II	NaBH4
B. subtilis	20	cluster37	tgggctatagccaagcggtaaggcaacggactttgactccgtcatgcgttggttcgaatccagctagcccagccacca	GlnTTG-2	21	D-loop	A	0	1.85433	1091.33	15.1513	FP type II	NaBH4
B. subtilis	30	cluster37	tgggctatagccaagcggtaaggcaacggactttgactccgtcatgcgttggttcgaatccagctagcccagccacca	GlnTTG-2	21	D-loop	A	0	1.59317	2117	22.1018	FP type II	NaBH4
B. subtilis	37	cluster37	tgggctatagccaagcggtaaggcaacggactttgactccgtcatgcgttggttcgaatccagctagcccagccacca	GlnTTG-2	21	D-loop	A	6.05342682578395e-15	1.07968	904	22.7277	FP type II	NaBH4
B. subtilis	20	cluster38	ggcccgttggtcaagcggttaagacaccgccctttcacggcggtaacacgggttcgaatcccgtacgggtcaccacca	GluTTC	21	D-loop	A	0	2.89957	6700.67	16.767	FP type II	NaBH4
B. subtilis	30	cluster38	ggcccgttggtcaagcggttaagacaccgccctttcacggcggtaacacgggttcgaatcccgtacgggtcaccacca	GluTTC	21	D-loop	A	0	3.08889	20407.3	26.0016	FP type II	NaBH4
B. subtilis	37	cluster38	ggcccgttggtcaagcggttaagacaccgccctttcacggcggtaacacgggttcgaatcccgtacgggtcaccacca	GluTTC	21	D-loop	A	0	2.9229	10026	21.4518	FP type II	NaBH4
B. subtilis	30	cluster40	gattccgtagctcagctgggagagcgctaccttgacagggtagaggtcgctggttcgagcccagtcggaatcaccacca	ValGAC	63	3' T-stem	A	0	4.03926	541	6.14115	FP type II	NaBH4
B. subtilis	37	cluster40	gattccgtagctcagctgggagagcgctaccttgacagggtagaggtcgctggttcgagcccagtcggaatcaccacca	ValGAC	48	V-region	C	1.84100443469918e-08	2.49585	100	2.33385	FP type II	NaBH4
B. subtilis	37	cluster40	gattccgtagctcagctgggagagcgctaccttgacagggtagaggtcgctggttcgagcccagtcggaatcaccacca	ValGAC	42	3' AC-stem	A	4.070888791578e-05	1.93695	56.3333	2.21147	FP type II	NaBH4
B. subtilis	20	cluster42	ggcggtgtagctcagctggctagagcgtacggttcatacccgtgaggtcgggggttcgatcccctccgccgctaccacca	MetCAT-3	34	AC-loop	C	0	4.33249	3288.67	24.0409	FP type II	NaBH4
B. subtilis	30	cluster42	ggcggtgtagctcagctggctagagcgtacggttcatacccgtgaggtcgggggttcgatcccctccgccgctaccacca	MetCAT-3	34	AC-loop	C	0	4.36082	5080.33	42.4928	FP type II	NaBH4
B. subtilis	37	cluster42	ggcggtgtagctcagctggctagagcgtacggttcatacccgtgaggtcgggggttcgatcccctccgccgctaccacca	MetCAT-3	34	AC-loop	C	0	3.12451	3532	53.8562	FP type II	NaBH4
B. subtilis	20	cluster5	gcggttgtggcgaagtggttaacgcaccagattgtggctctggcattcgtgggttcgattcccatcaatcgccccacca	HisGTG-2	23	3' D-stem	C	0	2.93452	445.333	9.62217	FP type II	NaBH4
B. subtilis	20	cluster5	gcggttgtggcgaagtggttaacgcaccagattgtggctctggcattcgtgggttcgattcccatcaatcgccccacca	HisGTG-2	21	D-loop	A	0	2.90285	317.333	15.109	FP type II	NaBH4
B. subtilis	30	cluster5	gcggttgtggcgaagtggttaacgcaccagattgtggctctggcattcgtgggttcgattcccatcaatcgccccacca	HisGTG-2	23	3' D-stem	C	0	2.78093	1104.67	18.1785	FP type II	NaBH4
B. subtilis	30	cluster5	gcggttgtggcgaagtggttaacgcaccagattgtggctctggcattcgtgggttcgattcccatcaatcgccccacca	HisGTG-2	21	D-loop	A	0	2.60635	726.667	25.6087	FP type II	NaBH4
B. subtilis	37	cluster5	gcggttgtggcgaagtggttaacgcaccagattgtggctctggcattcgtgggttcgattcccatcaatcgccccacca	HisGTG-2	23	3' D-stem	C	0	2.51383	465.667	19.5585	FP type II	NaBH4
B. subtilis	37	cluster5	gcggttgtggcgaagtggttaacgcaccagattgtggctctggcattcgtgggttcgattcccatcaatcgccccacca	HisGTG-2	21	D-loop	A	0	2.61789	308	26.0387	FP type II	NaBH4
B. subtilis	20	cluster6	tccacagtagctcagtggtagagctatcggctgttaaccgatcggtcgcaggttcgaatcctgcctgtggagccacca	AsnGTT-1	37	AC-loop	A	1.80300219199125e-15	1.50452	364.333	3.63059	FP type II	NaBH4
B. subtilis	30	cluster6	tccacagtagctcagtggtagagctatcggctgttaaccgatcggtcgcaggttcgaatcctgcctgtggagccacca	AsnGTT-1	37	AC-loop	A	1.73070675555413e-10	1.09657	928.667	5.38657	FP type II	NaBH4
B. subtilis	37	cluster6	tccacagtagctcagtggtagagctatcggctgttaaccgatcggtcgcaggttcgaatcctgcctgtggagccacca	AsnGTT-1	48	V-region	C	0	3.77118	335.667	2.00888	FP type II	NaBH4
B. subtilis	37	cluster6	tccacagtagctcagtggtagagctatcggctgttaaccgatcggtcgcaggttcgaatcctgcctgtggagccacca	AsnGTT-1	29	5' AC-stem	C	9.57731447335303e-05	1.25694	150	2.04165	FP type II	NaBH4
B. subtilis	37	cluster6	tccacagtagctcagtggtagagctatcggctgttaaccgatcggtcgcaggttcgaatcctgcctgtggagccacca	AsnGTT-1	13	5' D-stem	C	4.81510155017523e-06	1.87225	109	2.00723	FP type II	NaBH4
B. subtilis	20	cluster7	ggagaagtactcaagtggctgaagaggcgcccctgctaagggtgtaggtcgtgtaagcggcgcgagggttcaaatccctccttctccgccacca	SerGCT-2	20	D-loop	C	4.05365091668781e-07	1.97346	44.3333	6.21351	FP type II	NaBH4
B. subtilis	20	cluster7	ggagaagtactcaagtggctgaagaggcgcccctgctaagggtgtaggtcgtgtaagcggcgcgagggttcaaatccctccttctccgccacca	SerGCT-2	37	AC-loop	A	0.00090464	1.5532	46	2.29155	FP type II	NaBH4
B. subtilis	30	cluster7	ggagaagtactcaagtggctgaagaggcgcccctgctaagggtgtaggtcgtgtaagcggcgcgagggttcaaatccctccttctccgccacca	SerGCT-2	20	D-loop	C	0.000964577	1.36467	117.333	21.5611	FP type II	NaBH4
B. subtilis	30	cluster7	ggagaagtactcaagtggctgaagaggcgcccctgctaagggtgtaggtcgtgtaagcggcgcgagggttcaaatccctccttctccgccacca	SerGCT-2	35	AC-loop	C	0.00143609	1.03497	214.333	6.77521	FP type II	NaBH4
B. subtilis	30	cluster7	ggagaagtactcaagtggctgaagaggcgcccctgctaagggtgtaggtcgtgtaagcggcgcgagggttcaaatccctccttctccgccacca	SerGCT-2	37	AC-loop	A	2.06351361331514e-07	1.92575	196	5.52177	FP type II	NaBH4
B. subtilis	37	cluster7	ggagaagtactcaagtggctgaagaggcgcccctgctaagggtgtaggtcgtgtaagcggcgcgagggttcaaatccctccttctccgccacca	SerGCT-2	37	AC-loop	A	0.00341369	1.19595	59.6667	3.7349	FP type II	NaBH4
B. subtilis	20	cluster8	gccggtgtagctcaattggtagagcaactgacttgtaatcagtaggttgggggttcaagtcctcttgccggcaccacca	ThrTGT	40	3' AC-stem	C	0	1.70002	1135	4.42471	FP type II	NaBH4
B. subtilis	30	cluster8	gccggtgtagctcaattggtagagcaactgacttgtaatcagtaggttgggggttcaagtcctcttgccggcaccacca	ThrTGT	40	3' AC-stem	C	0	1.5488	1440	6.58684	FP type II	NaBH4
B. subtilis	30	cluster8	gccggtgtagctcaattggtagagcaactgacttgtaatcagtaggttgggggttcaagtcctcttgccggcaccacca	ThrTGT	14	D-loop	A	1.82137397336918e-05	1.76631	165.333	3.37776	FP type II	NaBH4
B. subtilis	30	cluster8	gccggtgtagctcaattggtagagcaactgacttgtaatcagtaggttgggggttcaagtcctcttgccggcaccacca	ThrTGT	11	5' D-stem	C	2.66949354188071e-11	2.37317	180.667	3.94054	FP type II	NaBH4
B. subtilis	37	cluster8	gccggtgtagctcaattggtagagcaactgacttgtaatcagtaggttgggggttcaagtcctcttgccggcaccacca	ThrTGT	40	3' AC-stem	C	0	1.07628	1162	8.24839	FP type II	NaBH4
B. subtilis	37	cluster8	gccggtgtagctcaattggtagagcaactgacttgtaatcagtaggttgggggttcaagtcctcttgccggcaccacca	ThrTGT	14	D-loop	A	0.00728154	1.06195	109.667	3.68852	FP type II	NaBH4
B. subtilis	37	cluster8	gccggtgtagctcaattggtagagcaactgacttgtaatcagtaggttgggggttcaagtcctcttgccggcaccacca	ThrTGT	11	5' D-stem	C	0.000942457	1.2789	85.6667	3.10183	FP type II	NaBH4
B. subtilis	30	cluster9	gcggatgtggcggaattggcagacgcgctagaatcaggctctagtgtctttacagacgtgggggttcaagtcccttcatccgcaccacca	LeuCAG	56	T-loop	C	5.16055169487303e-06	1.98041	126.333	3.37575	FP type II	NaBH4
B. subtilis	20	cluster1	gcggaagtagttcagtggtagaacaccaccttgccaaggtgggggtcgcgggttcgaatcccgtcttccgctccacca	GlyGCC	45	V-region	G	0	4.3463	731	6.0109	FP type I	NaBH4
B. subtilis	30	cluster1	gcggaagtagttcagtggtagaacaccaccttgccaaggtgggggtcgcgggttcgaatcccgtcttccgctccacca	GlyGCC	44	V-region	G	0	2.2882	443.333	2.81298	FP type I	NaBH4
B. subtilis	30	cluster1	gcggaagtagttcagtggtagaacaccaccttgccaaggtgggggtcgcgggttcgaatcccgtcttccgctccacca	GlyGCC	45	V-region	G	0	4.44115	1716	9.80358	FP type I	NaBH4
B. subtilis	37	cluster1	gcggaagtagttcagtggtagaacaccaccttgccaaggtgggggtcgcgggttcgaatcccgtcttccgctccacca	GlyGCC	44	V-region	G	5.89235279502912e-11	1.75673	257	3.09015	FP type I	NaBH4
B. subtilis	37	cluster1	gcggaagtagttcagtggtagaacaccaccttgccaaggtgggggtcgcgggttcgaatcccgtcttccgctccacca	GlyGCC	22	3' D-stem	G	0.00170315	1.09304	100	2.11417	FP type I	NaBH4
B. subtilis	37	cluster1	gcggaagtagttcagtggtagaacaccaccttgccaaggtgggggtcgcgggttcgaatcccgtcttccgctccacca	GlyGCC	45	V-region	G	0	3.87033	998.333	11.244	FP type I	NaBH4
B. subtilis	20	cluster11	gcggttgtggcgaagtggttaacgcaccagattgtggctctggcactcgtgggttcgattcccatcaatcgccccacca	HisGTG-1	7	5' ACC-stem	G	0	4.11475	160.333	60.8773	FP type I	NaBH4
B. subtilis	30	cluster11	gcggttgtggcgaagtggttaacgcaccagattgtggctctggcactcgtgggttcgattcccatcaatcgccccacca	HisGTG-1	7	5' ACC-stem	G	0	3.49873	290.333	91.1384	FP type I	NaBH4
B. subtilis	37	cluster11	gcggttgtggcgaagtggttaacgcaccagattgtggctctggcactcgtgggttcgattcccatcaatcgccccacca	HisGTG-1	7	5' ACC-stem	G	0	3.32611	121.667	87.236	FP type I	NaBH4
B. subtilis	30	cluster12	ggggccttagctcagctgggagagcgcctgctttgcacgcaggaggtcagcggttcgatcccgctaggctccaccacca	AlaTGC	45	V-region	G	0	5.63109	1620	6.82646	FP type I	NaBH4
B. subtilis	37	cluster12	ggggccttagctcagctgggagagcgcctgctttgcacgcaggaggtcagcggttcgatcccgctaggctccaccacca	AlaTGC	43	3' AC-stem	G	0	3.123	301	2.88768	FP type I	NaBH4
B. subtilis	37	cluster12	ggggccttagctcagctgggagagcgcctgctttgcacgcaggaggtcagcggttcgatcccgctaggctccaccacca	AlaTGC	45	V-region	G	0	5.95749	1197	10.4459	FP type I	NaBH4
B. subtilis	20	cluster13	gggcctgtagctcagctggttagagcgcacgcctgataagcgtgaggtcggtggttcgagtccactcaggcccaccacca	IleGAT-1	18	D-loop	G	0.00205649	1.29599	64.6667	2.13759	FP type I	NaBH4
B. subtilis	30	cluster13	gggcctgtagctcagctggttagagcgcacgcctgataagcgtgaggtcggtggttcgagtccactcaggcccaccacca	IleGAT-1	45	V-region	G	0	5.00178	1516	2.37296	FP type I	NaBH4
B. subtilis	37	cluster13	gggcctgtagctcagctggttagagcgcacgcctgataagcgtgaggtcggtggttcgagtccactcaggcccaccacca	IleGAT-1	45	V-region	G	0	5.35305	1215.33	3.22497	FP type I	NaBH4
B. subtilis	20	cluster14	gtcccagtagctcagctggatagagcaacggccttctaagccgtcggtcgggagttcgaatctctcctgggacgccacca	ArgTCT	45	V-region	G	0	3.78871	143	2.25408	FP type I	NaBH4
B. subtilis	20	cluster14	gtcccagtagctcagctggatagagcaacggccttctaagccgtcggtcgggagttcgaatctctcctgggacgccacca	ArgTCT	34	AC-loop	T	4.34370937572118e-06	1.32758	143.667	2.83006	FP type I	NaBH4
B. subtilis	30	cluster14	gtcccagtagctcagctggatagagcaacggccttctaagccgtcggtcgggagttcgaatctctcctgggacgccacca	ArgTCT	45	V-region	G	0	3.52273	318.667	3.97252	FP type I	NaBH4
B. subtilis	37	cluster14	gtcccagtagctcagctggatagagcaacggccttctaagccgtcggtcgggagttcgaatctctcctgggacgccacca	ArgTCT	45	V-region	G	0	4.53119	304	6.17061	FP type I	NaBH4
B. subtilis	30	cluster15	aggggcatagtttaacggtagaacagaggtctccaaaacctccggtgtgggttcgattcctactgcccctgccacca	TrpCCA	60	T-loop	T	3.70627516115207e-05	2.30066	75	2.08638	FP type I	NaBH4
B. subtilis	37	cluster15	aggggcatagtttaacggtagaacagaggtctccaaaacctccggtgtgggttcgattcctactgcccctgccacca	TrpCCA	50	5' T-stem	T	3.37581300489416e-05	2.01952	66.6667	2.1516	FP type I	NaBH4
B. subtilis	37	cluster15	aggggcatagtttaacggtagaacagaggtctccaaaacctccggtgtgggttcgattcctactgcccctgccacca	TrpCCA	13	5' D-stem	T	0.00192114	1.15864	35.3333	3.38194	FP type I	NaBH4
B. subtilis	30	cluster16	cgcggggtggagcagttcggtagctcgtcgggctcataacccgaaggtcgcaggttcaaatcctgcccccgcaaccacca	MetCAT-1	60	T-loop	T	0	4.39587	426.667	2.03513	FP type I	NaBH4
B. subtilis	20	cluster17	gcttccatagctcagcaggtagagcacttccatggtaaggaagaggtcagcggttcgagcccgcttggaagctccacca	ThrGGT	45	V-region	G	0	3.79865	96.3333	3.19919	FP type I	NaBH4
B. subtilis	30	cluster17	gcttccatagctcagcaggtagagcacttccatggtaaggaagaggtcagcggttcgagcccgcttggaagctccacca	ThrGGT	45	V-region	G	0	3.46651	204.333	8.14352	FP type I	NaBH4
B. subtilis	37	cluster17	gcttccatagctcagcaggtagagcacttccatggtaaggaagaggtcagcggttcgagcccgcttggaagctccacca	ThrGGT	45	V-region	G	0	4.20879	213.333	12.231	FP type I	NaBH4
B. subtilis	30	cluster19	gcgcccgtagctcaattggatagagcgtttgactacggatcaaaaggttaggggttcgactcctctcgggcgcgccacca	ArgACG	45	V-region	G	0	4.43559	1330	4.45115	FP type I	NaBH4
B. subtilis	37	cluster19	gcgcccgtagctcaattggatagagcgtttgactacggatcaaaaggttaggggttcgactcctctcgggcgcgccacca	ArgACG	30	5' AC-stem	G	0.000265168	1.42281	72	2.57344	FP type I	NaBH4
B. subtilis	37	cluster19	gcgcccgtagctcaattggatagagcgtttgactacggatcaaaaggttaggggttcgactcctctcgggcgcgccacca	ArgACG	45	V-region	G	0	4.45204	983	5.24632	FP type I	NaBH4
B. subtilis	37	cluster19	gcgcccgtagctcaattggatagagcgtttgactacggatcaaaaggttaggggttcgactcctctcgggcgcgccacca	ArgACG	28	5' AC-stem	T	3.37581300489416e-05	1.6952	65	2.43279	FP type I	NaBH4
B. subtilis	37	cluster2	gccggtgtggcggaattggcagacgcgcacgactcaaaatcgtgttccttctggagtgtcggttcgaccccgaccaccggtaccacca	LeuCAA	5e	V-region	T	0.000875179	1.08449	123.667	2.91615	FP type I	NaBH4
B. subtilis	37	cluster2	gccggtgtggcggaattggcagacgcgcacgactcaaaatcgtgttccttctggagtgtcggttcgaccccgaccaccggtaccacca	LeuCAA	45	V-region	T	0.000265168	1.72102	75.3333	2.05755	FP type I	NaBH4
B. subtilis	37	cluster2	gccggtgtggcggaattggcagacgcgcacgactcaaaatcgtgttccttctggagtgtcggttcgaccccgaccaccggtaccacca	LeuCAA	21	D-loop	G	0.00192114	1.33919	37.3333	3.10311	FP type I	NaBH4
B. subtilis	20	cluster20	ggcggcatagccaagtggtaaggcagaggtctgcaaaacctttatccccggttcgaatccgggtgtcgcctccacca	CysGCA	19	D-loop	G	0	2.74875	214.333	7.53344	FP type I	NaBH4
B. subtilis	30	cluster20	ggcggcatagccaagtggtaaggcagaggtctgcaaaacctttatccccggttcgaatccgggtgtcgcctccacca	CysGCA	19	D-loop	G	4.24377413210664e-11	2.35696	240.333	12.3675	FP type I	NaBH4
B. subtilis	37	cluster20	ggcggcatagccaagtggtaaggcagaggtctgcaaaacctttatccccggttcgaatccgggtgtcgcctccacca	CysGCA	19	D-loop	G	6.34298740503457e-05	1.83143	88	12.6459	FP type I	NaBH4
B. subtilis	37	cluster21	ggaggggtagcgaagtggctaaacgcggcggactgtaaatccgctccctcagggttcggcagttcgaatctgcccccctccaccacca	TyrGTA	35	AC-loop	T	0.000476956	1.10043	164.333	5.85793	FP type I	NaBH4
B. subtilis	20	cluster22	gcgggtgtagtttagtggtaaaacctcagccttccaagctgatgtcgtgagttcgattctcatcacccgctccacca	GlyTCC-1	19	D-loop	G	1.39252254579188e-06	1.51324	112.667	7.19843	FP type I	NaBH4
B. subtilis	30	cluster23	ggtccggtagttcagttggttagaatgcctgcctgtcacgcaggaggtcgcgggttcgagtcccgtccggaccgccacca	AspGTC	45	V-region	G	0	4.2246	1023	2.70652	FP type I	NaBH4
B. subtilis	37	cluster23	ggtccggtagttcagttggttagaatgcctgcctgtcacgcaggaggtcgcgggttcgagtcccgtccggaccgccacca	AspGTC	45	V-region	G	0	4.88758	958	3.71442	FP type I	NaBH4
B. subtilis	30	cluster24	gcggtcgtggcggaatggcagacgcgctaggttgagggcctagtgggtgaataacccgtggaggttcaagtcctctcggccgcaccacca	LeuGAG	4e	V-region	T	0.00603968	1.08349	135.667	2.67542	FP type I	NaBH4
B. subtilis	37	cluster24	gcggtcgtggcggaatggcagacgcgctaggttgagggcctagtgggtgaataacccgtggaggttcaagtcctctcggccgcaccacca	LeuGAG	41	3' AC-stem	T	4.070888791578e-05	2.10184	52	2.72077	FP type I	NaBH4
B. subtilis	20	cluster25	gcgggtgtagtttagtggtaaaacctcagccttccaagctgatgtcgtgggttcgattcccatcacccgctccacca	GlyTCC-2	19	D-loop	G	1.32928040765417e-09	2.03247	98.3333	8.1325	FP type I	NaBH4
B. subtilis	20	cluster26	ggagaagtactcaagtggctgaagaggcgcccctgctaagggtgtaggtcgcgtaagcggcgcgagggttcaaatccctccttctccgccacca	SerGCT-1	20b	D-loop	G	0	3.73147	169	6.80873	FP type I	NaBH4
B. subtilis	20	cluster26	ggagaagtactcaagtggctgaagaggcgcccctgctaagggtgtaggtcgcgtaagcggcgcgagggttcaaatccctccttctccgccacca	SerGCT-1	36	AC-loop	T	0.000793612	1.14905	91	2.44138	FP type I	NaBH4
B. subtilis	20	cluster26	ggagaagtactcaagtggctgaagaggcgcccctgctaagggtgtaggtcgcgtaagcggcgcgagggttcaaatccctccttctccgccacca	SerGCT-1	19	D-loop	G	0.00799546	1.24902	51.3333	3.89456	FP type I	NaBH4
B. subtilis	30	cluster26	ggagaagtactcaagtggctgaagaggcgcccctgctaagggtgtaggtcgcgtaagcggcgcgagggttcaaatccctccttctccgccacca	SerGCT-1	20b	D-loop	G	0	3.37795	355.333	16.9599	FP type I	NaBH4
B. subtilis	30	cluster26	ggagaagtactcaagtggctgaagaggcgcccctgctaagggtgtaggtcgcgtaagcggcgcgagggttcaaatccctccttctccgccacca	SerGCT-1	41	3' AC-stem	G	0.00603968	1.23967	138	3.02915	FP type I	NaBH4
B. subtilis	37	cluster26	ggagaagtactcaagtggctgaagaggcgcccctgctaagggtgtaggtcgcgtaagcggcgcgagggttcaaatccctccttctccgccacca	SerGCT-1	20b	D-loop	G	0	2.9754	204.667	14.0161	FP type I	NaBH4
B. subtilis	37	cluster26	ggagaagtactcaagtggctgaagaggcgcccctgctaagggtgtaggtcgcgtaagcggcgcgagggttcaaatccctccttctccgccacca	SerGCT-1	41	3' AC-stem	G	0.000621298	1.1961	113	3.78345	FP type I	NaBH4
B. subtilis	20	cluster27	ggggccatagctcagctgggagagcgctacgctggcagcgtagaggtcaggggttcgagcccccttggctccaccacca	AlaGGC	45	V-region	G	0	3.95976	149.667	4.6293	FP type I	NaBH4
B. subtilis	30	cluster27	ggggccatagctcagctgggagagcgctacgctggcagcgtagaggtcaggggttcgagcccccttggctccaccacca	AlaGGC	45	V-region	G	0	5.04175	660	11.8441	FP type I	NaBH4
B. subtilis	37	cluster27	ggggccatagctcagctgggagagcgctacgctggcagcgtagaggtcaggggttcgagcccccttggctccaccacca	AlaGGC	38	AC-loop	G	0.000300263	1.88285	46	2.14496	FP type I	NaBH4
B. subtilis	37	cluster27	ggggccatagctcagctgggagagcgctacgctggcagcgtagaggtcaggggttcgagcccccttggctccaccacca	AlaGGC	45	V-region	G	0	4.76478	558.667	18.1727	FP type I	NaBH4
B. subtilis	37	cluster27	ggggccatagctcagctgggagagcgctacgctggcagcgtagaggtcaggggttcgagcccccttggctccaccacca	AlaGGC	43	3' AC-stem	G	5.74275546305625e-06	2.14695	83.3333	3.20555	FP type I	NaBH4
B. subtilis	30	cluster28	gggcctgtagctcagctggttagagcgcacgcctgataagcgtgaggtcgatggttcgagtccattcaggcccaccacca	IleGAT-2	45	V-region	G	0	4.02584	378	3.01458	FP type I	NaBH4
B. subtilis	37	cluster28	gggcctgtagctcagctggttagagcgcacgcctgataagcgtgaggtcgatggttcgagtccattcaggcccaccacca	IleGAT-2	45	V-region	G	0	4.46428	360	3.88663	FP type I	NaBH4
B. subtilis	20	cluster29	ggaggattagctcagctgggagagcatctgccttacaagcagagggtcggcggttcgagcccgtcatcctccaccacca	ValTAC	45	V-region	G	0	4.69332	221	3.57741	FP type I	NaBH4
B. subtilis	30	cluster29	ggaggattagctcagctgggagagcatctgccttacaagcagagggtcggcggttcgagcccgtcatcctccaccacca	ValTAC	45	V-region	G	0	4.77952	769.333	6.36989	FP type I	NaBH4
B. subtilis	30	cluster29	ggaggattagctcagctgggagagcatctgccttacaagcagagggtcggcggttcgagcccgtcatcctccaccacca	ValTAC	44	V-region	G	1.00204271872554e-07	1.80462	250.667	2.19176	FP type I	NaBH4
B. subtilis	37	cluster29	ggaggattagctcagctgggagagcatctgccttacaagcagagggtcggcggttcgagcccgtcatcctccaccacca	ValTAC	45	V-region	G	0	4.49835	540.333	8.37917	FP type I	NaBH4
B. subtilis	37	cluster29	ggaggattagctcagctgggagagcatctgccttacaagcagagggtcggcggttcgagcccgtcatcctccaccacca	ValTAC	44	V-region	G	1.46930740798234e-09	1.91313	177.667	2.9579	FP type I	NaBH4
B. subtilis	37	cluster29	ggaggattagctcagctgggagagcatctgccttacaagcagagggtcggcggttcgagcccgtcatcctccaccacca	ValTAC	27	5' AC-stem	T	0.00017706	1.7645	63.3333	2.01064	FP type I	NaBH4
B. subtilis	30	cluster32	ggacctttagctcagttggttagagcagacggctcataaccgtccggtcgtaggttcgagtcctacaaggtccaccacca	MetCAT-2	36	AC-loop	T	1.92176215487543e-05	1.51917	210.667	3.16049	FP type I	NaBH4
B. subtilis	37	cluster32	ggacctttagctcagttggttagagcagacggctcataaccgtccggtcgtaggttcgagtcctacaaggtccaccacca	MetCAT-2	36	AC-loop	T	1.22088631774092e-05	1.33131	164.333	4.03548	FP type I	NaBH4
B. subtilis	37	cluster33	tccgcagtagctcagtggtagagctatcggctgttaaccgatcggtcgtaggttcgaatcctacctgcggagccacca	AsnGTT-2	45	V-region	G	0	3.87109	330.667	3.04005	FP type I	NaBH4
B. subtilis	20	cluster34	ggaggaatacccaagtccggctgaagggatcggtcttgaaaaccgacaggggtgtcaaagcccgcgggggttcgaatccctcttcctccgccacca	SerTGA-2	35	AC-loop	G	5.89822459870226e-06	1.16336	156	6.70479	FP type I	NaBH4
B. subtilis	20	cluster35	gagccattagctcagttggtagagcatctgacttttaatcagagggtcgaaggttcgagtccttcatggctcaccacca	LysTTT	45	V-region	G	0	5.87054	1111.67	2.14657	FP type I	NaBH4
B. subtilis	20	cluster35	gagccattagctcagttggtagagcatctgacttttaatcagagggtcgaaggttcgagtccttcatggctcaccacca	LysTTT	36	AC-loop	T	0	1.31395	718.667	17.1107	FP type I	NaBH4
B. subtilis	20	cluster35	gagccattagctcagttggtagagcatctgacttttaatcagagggtcgaaggttcgagtccttcatggctcaccacca	LysTTT	42	3' AC-stem	G	0	6.64462	2918	5.87623	FP type I	NaBH4
B. subtilis	30	cluster35	gagccattagctcagttggtagagcatctgacttttaatcagagggtcgaaggttcgagtccttcatggctcaccacca	LysTTT	45	V-region	G	0	5.38449	1923.33	2.67646	FP type I	NaBH4
B. subtilis	30	cluster35	gagccattagctcagttggtagagcatctgacttttaatcagagggtcgaaggttcgagtccttcatggctcaccacca	LysTTT	42	3' AC-stem	G	0	6.48844	7958.33	11.4107	FP type I	NaBH4
B. subtilis	37	cluster35	gagccattagctcagttggtagagcatctgacttttaatcagagggtcgaaggttcgagtccttcatggctcaccacca	LysTTT	45	V-region	G	0	6.25545	1518	3.56568	FP type I	NaBH4
B. subtilis	37	cluster35	gagccattagctcagttggtagagcatctgacttttaatcagagggtcgaaggttcgagtccttcatggctcaccacca	LysTTT	39	3' AC-stem	T	7.79985128982212e-05	1.67178	95.3333	2.30721	FP type I	NaBH4
B. subtilis	37	cluster35	gagccattagctcagttggtagagcatctgacttttaatcagagggtcgaaggttcgagtccttcatggctcaccacca	LysTTT	42	3' AC-stem	G	0	6.77706	5510.67	13.6458	FP type I	NaBH4
B. subtilis	37	cluster36	gcgggtgtggcggaattggcagacgcgctagacttaggatctagtgtctttatgacgtgggggttcaagtcccttcacccgcaccacca	LeuTAG-2	21	D-loop	G	0.00192114	1.54509	35	5.45944	FP type I	NaBH4
B. subtilis	20	cluster39	ggctcggtagctcagttggtagagcaacggactgaaaatccgtgtgtcggcggttcgattccgtcccgagccaccacca	PheGAA	42	3' AC-stem	G	0	5.10961	1644.67	2.28306	FP type I	NaBH4
B. subtilis	30	cluster39	ggctcggtagctcagttggtagagcaacggactgaaaatccgtgtgtcggcggttcgattccgtcccgagccaccacca	PheGAA	42	3' AC-stem	G	0	4.95921	5819	4.12956	FP type I	NaBH4
B. subtilis	37	cluster39	ggctcggtagctcagttggtagagcaacggactgaaaatccgtgtgtcggcggttcgattccgtcccgagccaccacca	PheGAA	42	3' AC-stem	G	0	5.29745	4524.33	4.76186	FP type I	NaBH4
B. subtilis	37	cluster39	ggctcggtagctcagttggtagagcaacggactgaaaatccgtgtgtcggcggttcgattccgtcccgagccaccacca	PheGAA	44	V-region	G	0	2.5028	2167	2.16162	FP type I	NaBH4
B. subtilis	37	cluster4	gctctagtagcacagcggatagtgcagcagtttcctaaactgcaggtcgggagttcgaatctctcctagagcgccacca	ArgCCT	45	V-region	G	0	1.59458	20.6667	6.29807	FP type I	NaBH4
B. subtilis	20	cluster40	gattccgtagctcagctgggagagcgctaccttgacagggtagaggtcgctggttcgagcccagtcggaatcaccacca	ValGAC	45	V-region	G	0	4.43401	154.667	4.69246	FP type I	NaBH4
B. subtilis	30	cluster40	gattccgtagctcagctgggagagcgctaccttgacagggtagaggtcgctggttcgagcccagtcggaatcaccacca	ValGAC	45	V-region	G	0	4.92508	591.667	9.77173	FP type I	NaBH4
B. subtilis	30	cluster40	gattccgtagctcagctgggagagcgctaccttgacagggtagaggtcgctggttcgagcccagtcggaatcaccacca	ValGAC	43	3' AC-stem	G	7.06490934535795e-05	1.60715	154.333	2.87595	FP type I	NaBH4
B. subtilis	37	cluster40	gattccgtagctcagctgggagagcgctaccttgacagggtagaggtcgctggttcgagcccagtcggaatcaccacca	ValGAC	45	V-region	G	0	4.79625	399	13.5249	FP type I	NaBH4
B. subtilis	37	cluster40	gattccgtagctcagctgggagagcgctaccttgacagggtagaggtcgctggttcgagcccagtcggaatcaccacca	ValGAC	43	3' AC-stem	G	4.81510155017523e-06	1.7659	114	4.35366	FP type I	NaBH4
B. subtilis	37	cluster41	cgggaagtagctcagcttggtagagcacatggtttgggaccatggggtcgcaggttcgaatcctgtcttcccgaccacca	ProTGG	45	V-region	G	0	5.08553	441.667	2.43788	FP type I	NaBH4
B. subtilis	30	cluster42	ggcggtgtagctcagctggctagagcgtacggttcatacccgtgaggtcgggggttcgatcccctccgccgctaccacca	MetCAT-3	45	V-region	G	0	3.23258	350.667	2.6965	FP type I	NaBH4
B. subtilis	37	cluster42	ggcggtgtagctcagctggctagagcgtacggttcatacccgtgaggtcgggggttcgatcccctccgccgctaccacca	MetCAT-3	45	V-region	G	0	3.60068	301	3.87672	FP type I	NaBH4
B. subtilis	20	cluster5	gcggttgtggcgaagtggttaacgcaccagattgtggctctggcattcgtgggttcgattcccatcaatcgccccacca	HisGTG-2	7	5' ACC-stem	G	0	4.03078	140.667	58.9117	FP type I	NaBH4
B. subtilis	30	cluster5	gcggttgtggcgaagtggttaacgcaccagattgtggctctggcattcgtgggttcgattcccatcaatcgccccacca	HisGTG-2	7	5' ACC-stem	G	0	3.694	316.333	92.8289	FP type I	NaBH4
B. subtilis	37	cluster5	gcggttgtggcgaagtggttaacgcaccagattgtggctctggcattcgtgggttcgattcccatcaatcgccccacca	HisGTG-2	7	5' ACC-stem	G	3.38369562254472e-12	2.66808	125	88.5835	FP type I	NaBH4
B. subtilis	30	cluster6	tccacagtagctcagtggtagagctatcggctgttaaccgatcggtcgcaggttcgaatcctgcctgtggagccacca	AsnGTT-1	45	V-region	G	0	3.49997	399.667	2.15653	FP type I	NaBH4
B. subtilis	37	cluster6	tccacagtagctcagtggtagagctatcggctgttaaccgatcggtcgcaggttcgaatcctgcctgtggagccacca	AsnGTT-1	45	V-region	G	0	4.57518	427.333	3.76153	FP type I	NaBH4
B. subtilis	20	cluster7	ggagaagtactcaagtggctgaagaggcgcccctgctaagggtgtaggtcgtgtaagcggcgcgagggttcaaatccctccttctccgccacca	SerGCT-2	20b	D-loop	G	0	3.23173	98	7.54848	FP type I	NaBH4
B. subtilis	30	cluster7	ggagaagtactcaagtggctgaagaggcgcccctgctaagggtgtaggtcgtgtaagcggcgcgagggttcaaatccctccttctccgccacca	SerGCT-2	36	AC-loop	T	0.0020394	1.07895	196.667	5.80529	FP type I	NaBH4
B. subtilis	30	cluster7	ggagaagtactcaagtggctgaagaggcgcccctgctaagggtgtaggtcgtgtaagcggcgcgagggttcaaatccctccttctccgccacca	SerGCT-2	20b	D-loop	G	0	3.21258	278	17.3377	FP type I	NaBH4
B. subtilis	37	cluster7	ggagaagtactcaagtggctgaagaggcgcccctgctaagggtgtaggtcgtgtaagcggcgcgagggttcaaatccctccttctccgccacca	SerGCT-2	20b	D-loop	G	6.05342682578395e-15	2.85439	108	12.2478	FP type I	NaBH4
B. subtilis	20	cluster8	gccggtgtagctcaattggtagagcaactgacttgtaatcagtaggttgggggttcaagtcctcttgccggcaccacca	ThrTGT	45	V-region	G	0	4.02125	748	2.68821	FP type I	NaBH4
B. subtilis	20	cluster8	gccggtgtagctcaattggtagagcaactgacttgtaatcagtaggttgggggttcaagtcctcttgccggcaccacca	ThrTGT	35	AC-loop	G	0	1.34543	973.333	4.1902	FP type I	NaBH4
B. subtilis	30	cluster8	gccggtgtagctcaattggtagagcaactgacttgtaatcagtaggttgggggttcaagtcctcttgccggcaccacca	ThrTGT	18	D-loop	G	0	2.72949	322.667	2.3476	FP type I	NaBH4
B. subtilis	30	cluster8	gccggtgtagctcaattggtagagcaactgacttgtaatcagtaggttgggggttcaagtcctcttgccggcaccacca	ThrTGT	45	V-region	G	0	3.96173	1094	4.65243	FP type I	NaBH4
B. subtilis	37	cluster8	gccggtgtagctcaattggtagagcaactgacttgtaatcagtaggttgggggttcaagtcctcttgccggcaccacca	ThrTGT	18	D-loop	G	0	2.5674	231	2.99351	FP type I	NaBH4
B. subtilis	37	cluster8	gccggtgtagctcaattggtagagcaactgacttgtaatcagtaggttgggggttcaagtcctcttgccggcaccacca	ThrTGT	53	5' T-stem	G	0	2.42881	568	2.42204	FP type I	NaBH4
B. subtilis	37	cluster8	gccggtgtagctcaattggtagagcaactgacttgtaatcagtaggttgggggttcaagtcctcttgccggcaccacca	ThrTGT	52	5' T-stem	G	0	2.84795	624	2.76123	FP type I	NaBH4
B. subtilis	37	cluster8	gccggtgtagctcaattggtagagcaactgacttgtaatcagtaggttgggggttcaagtcctcttgccggcaccacca	ThrTGT	45	V-region	G	0	3.77459	1017.67	6.17581	FP type I	NaBH4
B. subtilis	37	cluster9	gcggatgtggcggaattggcagacgcgctagaatcaggctctagtgtctttacagacgtgggggttcaagtcccttcatccgcaccacca	LeuCAG	53	5' T-stem	G	4.070888791578e-05	1.7503	53.3333	2.62716	FP type I	NaBH4
B. subtilis	20	cluster1	gcggaagtagttcagtggtagaacaccaccttgccaaggtgggggtcgcgggttcgaatcccgtcttccgctccacca	GlyGCC	20	D-loop	T	0	3.08962	726.667	8.06528	D	NaBH4
B. subtilis	30	cluster1	gcggaagtagttcagtggtagaacaccaccttgccaaggtgggggtcgcgggttcgaatcccgtcttccgctccacca	GlyGCC	20	D-loop	T	0	3.34624	2234	18.6325	D	NaBH4
B. subtilis	37	cluster1	gcggaagtagttcagtggtagaacaccaccttgccaaggtgggggtcgcgggttcgaatcccgtcttccgctccacca	GlyGCC	47	V-region	T	0	2.69354	503	2.7238	D	NaBH4
B. subtilis	37	cluster1	gcggaagtagttcagtggtagaacaccaccttgccaaggtgggggtcgcgggttcgaatcccgtcttccgctccacca	GlyGCC	20	D-loop	T	0	2.58816	1063	21.6742	D	NaBH4
B. subtilis	20	cluster10	gcgggtgtggcggaattggcagacgcgctagacttaggatctagtgtcttacgacgtgggggttcgagtcccttcacccgcaccacca	LeuTAG-1	16	D-loop	T	3.95183611402915e-06	1.83443	40.6667	7.96189	D	NaBH4
B. subtilis	20	cluster10	gcgggtgtggcggaattggcagacgcgctagacttaggatctagtgtcttacgacgtgggggttcgagtcccttcacccgcaccacca	LeuTAG-1	17	D-loop	T	0	5.21208	385	35.303	D	NaBH4
B. subtilis	30	cluster10	gcgggtgtggcggaattggcagacgcgctagacttaggatctagtgtcttacgacgtgggggttcgagtcccttcacccgcaccacca	LeuTAG-1	17	D-loop	T	0	4.69508	462.333	61.0548	D	NaBH4
B. subtilis	37	cluster10	gcgggtgtggcggaattggcagacgcgctagacttaggatctagtgtcttacgacgtgggggttcgagtcccttcacccgcaccacca	LeuTAG-1	17	D-loop	T	0	3.80452	161	42.4756	D	NaBH4
B. subtilis	20	cluster11	gcggttgtggcgaagtggttaacgcaccagattgtggctctggcactcgtgggttcgattcccatcaatcgccccacca	HisGTG-1	20a	D-loop	T	0	2.92131	424	23.0463	D	NaBH4
B. subtilis	20	cluster11	gcggttgtggcgaagtggttaacgcaccagattgtggctctggcactcgtgggttcgattcccatcaatcgccccacca	HisGTG-1	20	D-loop	T	5.81325111505117e-15	1.81018	235.333	19.9478	D	NaBH4
B. subtilis	30	cluster11	gcggttgtggcgaagtggttaacgcaccagattgtggctctggcactcgtgggttcgattcccatcaatcgccccacca	HisGTG-1	20a	D-loop	T	0	2.87915	888.333	40.3113	D	NaBH4
B. subtilis	30	cluster11	gcggttgtggcgaagtggttaacgcaccagattgtggctctggcactcgtgggttcgattcccatcaatcgccccacca	HisGTG-1	20	D-loop	T	4.37252903172834e-08	1.47197	415.333	31.8085	D	NaBH4
B. subtilis	37	cluster11	gcggttgtggcgaagtggttaacgcaccagattgtggctctggcactcgtgggttcgattcccatcaatcgccccacca	HisGTG-1	20a	D-loop	T	0	3.28599	394.333	46.1251	D	NaBH4
B. subtilis	20	cluster12	ggggccttagctcagctgggagagcgcctgctttgcacgcaggaggtcagcggttcgatcccgctaggctccaccacca	AlaTGC	17	D-loop	T	0	3.88377	1133	4.5359	D	NaBH4
B. subtilis	30	cluster12	ggggccttagctcagctgggagagcgcctgctttgcacgcaggaggtcagcggttcgatcccgctaggctccaccacca	AlaTGC	17	D-loop	T	0	2.98704	1122	6.64136	D	NaBH4
B. subtilis	37	cluster12	ggggccttagctcagctgggagagcgcctgctttgcacgcaggaggtcagcggttcgatcccgctaggctccaccacca	AlaTGC	47	V-region	T	0	3.10558	375	2.28788	D	NaBH4
B. subtilis	37	cluster12	ggggccttagctcagctgggagagcgcctgctttgcacgcaggaggtcagcggttcgatcccgctaggctccaccacca	AlaTGC	17	D-loop	T	0	2.41388	471	7.15984	D	NaBH4
B. subtilis	20	cluster13	gggcctgtagctcagctggttagagcgcacgcctgataagcgtgaggtcggtggttcgagtccactcaggcccaccacca	IleGAT-1	17	D-loop	T	0	3.05066	1457	49.9789	D	NaBH4
B. subtilis	20	cluster13	gggcctgtagctcagctggttagagcgcacgcctgataagcgtgaggtcggtggttcgagtccactcaggcccaccacca	IleGAT-1	20	D-loop	T	0	5.01038	5716.67	47.85	D	NaBH4
B. subtilis	20	cluster13	gggcctgtagctcagctggttagagcgcacgcctgataagcgtgaggtcggtggttcgagtccactcaggcccaccacca	IleGAT-1	20a	D-loop	T	0	3.84078	2621.33	16.3742	D	NaBH4
B. subtilis	30	cluster13	gggcctgtagctcagctggttagagcgcacgcctgataagcgtgaggtcggtggttcgagtccactcaggcccaccacca	IleGAT-1	20	D-loop	T	0	4.92187	23644.3	81.5642	D	NaBH4
B. subtilis	30	cluster13	gggcctgtagctcagctggttagagcgcacgcctgataagcgtgaggtcggtggttcgagtccactcaggcccaccacca	IleGAT-1	17	D-loop	T	0	2.45741	3727	80.9979	D	NaBH4
B. subtilis	30	cluster13	gggcctgtagctcagctggttagagcgcacgcctgataagcgtgaggtcggtggttcgagtccactcaggcccaccacca	IleGAT-1	20a	D-loop	T	0	3.67872	10248.3	26.1286	D	NaBH4
B. subtilis	37	cluster13	gggcctgtagctcagctggttagagcgcacgcctgataagcgtgaggtcggtggttcgagtccactcaggcccaccacca	IleGAT-1	20	D-loop	T	0	4.47527	13952.7	84.6844	D	NaBH4
B. subtilis	37	cluster13	gggcctgtagctcagctggttagagcgcacgcctgataagcgtgaggtcggtggttcgagtccactcaggcccaccacca	IleGAT-1	17	D-loop	T	0	1.97823	1692.67	72.2849	D	NaBH4
B. subtilis	37	cluster13	gggcctgtagctcagctggttagagcgcacgcctgataagcgtgaggtcggtggttcgagtccactcaggcccaccacca	IleGAT-1	20a	D-loop	T	0	3.32138	6266.67	27.3788	D	NaBH4
B. subtilis	20	cluster14	gtcccagtagctcagctggatagagcaacggccttctaagccgtcggtcgggagttcgaatctctcctgggacgccacca	ArgTCT	17	D-loop	T	0	5.286	1000	26.3078	D	NaBH4
B. subtilis	20	cluster14	gtcccagtagctcagctggatagagcaacggccttctaagccgtcggtcgggagttcgaatctctcctgggacgccacca	ArgTCT	20a	D-loop	T	0	3.49906	244.667	5.57294	D	NaBH4
B. subtilis	30	cluster14	gtcccagtagctcagctggatagagcaacggccttctaagccgtcggtcgggagttcgaatctctcctgggacgccacca	ArgTCT	17	D-loop	T	0	5.1105	2103.33	48.7155	D	NaBH4
B. subtilis	30	cluster14	gtcccagtagctcagctggatagagcaacggccttctaagccgtcggtcgggagttcgaatctctcctgggacgccacca	ArgTCT	20a	D-loop	T	0	3.0721	462.333	8.95134	D	NaBH4
B. subtilis	37	cluster14	gtcccagtagctcagctggatagagcaacggccttctaagccgtcggtcgggagttcgaatctctcctgggacgccacca	ArgTCT	17	D-loop	T	0	3.71674	779	35.6635	D	NaBH4
B. subtilis	37	cluster14	gtcccagtagctcagctggatagagcaacggccttctaagccgtcggtcgggagttcgaatctctcctgggacgccacca	ArgTCT	20a	D-loop	T	0	2.89217	351.333	13.122	D	NaBH4
B. subtilis	20	cluster15	aggggcatagtttaacggtagaacagaggtctccaaaacctccggtgtgggttcgattcctactgcccctgccacca	TrpCCA	20	D-loop	T	0	3.11522	201.667	7.5732	D	NaBH4
B. subtilis	30	cluster15	aggggcatagtttaacggtagaacagaggtctccaaaacctccggtgtgggttcgattcctactgcccctgccacca	TrpCCA	20	D-loop	T	2.85776911776654e-13	2.71374	199.667	11.7471	D	NaBH4
B. subtilis	37	cluster15	aggggcatagtttaacggtagaacagaggtctccaaaacctccggtgtgggttcgattcctactgcccctgccacca	TrpCCA	20	D-loop	T	0	2.86705	183	13.2575	D	NaBH4
B. subtilis	20	cluster16	cgcggggtggagcagttcggtagctcgtcgggctcataacccgaaggtcgcaggttcaaatcctgcccccgcaaccacca	MetCAT-1	20	D-loop	T	0	5.2543	1555	10.4622	D	NaBH4
B. subtilis	30	cluster16	cgcggggtggagcagttcggtagctcgtcgggctcataacccgaaggtcgcaggttcaaatcctgcccccgcaaccacca	MetCAT-1	20	D-loop	T	0	4.86184	3096.33	22.1218	D	NaBH4
B. subtilis	30	cluster16	cgcggggtggagcagttcggtagctcgtcgggctcataacccgaaggtcgcaggttcaaatcctgcccccgcaaccacca	MetCAT-1	17	D-loop	T	0	2.75308	336.333	3.1645	D	NaBH4
B. subtilis	37	cluster16	cgcggggtggagcagttcggtagctcgtcgggctcataacccgaaggtcgcaggttcaaatcctgcccccgcaaccacca	MetCAT-1	20	D-loop	T	0	4.21876	1954.67	28.3146	D	NaBH4
B. subtilis	37	cluster16	cgcggggtggagcagttcggtagctcgtcgggctcataacccgaaggtcgcaggttcaaatcctgcccccgcaaccacca	MetCAT-1	16	D-loop	T	1.69162119590156e-06	1.53301	137	3.25747	D	NaBH4
B. subtilis	37	cluster16	cgcggggtggagcagttcggtagctcgtcgggctcataacccgaaggtcgcaggttcaaatcctgcccccgcaaccacca	MetCAT-1	47	V-region	T	0	2.37526	255	2.29532	D	NaBH4
B. subtilis	37	cluster16	cgcggggtggagcagttcggtagctcgtcgggctcataacccgaaggtcgcaggttcaaatcctgcccccgcaaccacca	MetCAT-1	17	D-loop	T	0	2.77257	232	4.92053	D	NaBH4
B. subtilis	20	cluster17	gcttccatagctcagcaggtagagcacttccatggtaaggaagaggtcagcggttcgagcccgcttggaagctccacca	ThrGGT	20	D-loop	T	0	3.36878	105	5.02456	D	NaBH4
B. subtilis	30	cluster17	gcttccatagctcagcaggtagagcacttccatggtaaggaagaggtcagcggttcgagcccgcttggaagctccacca	ThrGGT	20	D-loop	T	8.34665669913193e-14	3.02036	165	11.1125	D	NaBH4
B. subtilis	37	cluster17	gcttccatagctcagcaggtagagcacttccatggtaaggaagaggtcagcggttcgagcccgcttggaagctccacca	ThrGGT	47	V-region	T	0.00341369	1.65386	51.6667	2.34087	D	NaBH4
B. subtilis	37	cluster17	gcttccatagctcagcaggtagagcacttccatggtaaggaagaggtcagcggttcgagcccgcttggaagctccacca	ThrGGT	20	D-loop	T	2.3212002941222e-11	2.56673	92.3333	12.1626	D	NaBH4
B. subtilis	20	cluster18	gcgctcgtagctcagttggatagagcggtggtttccggtaccacgtctgtcgggggttcgaatccctccgagcgcgccacca	ArgCCG	17	D-loop	T	0	5.17514	331.667	14.6873	D	NaBH4
B. subtilis	20	cluster18	gcgctcgtagctcagttggatagagcggtggtttccggtaccacgtctgtcgggggttcgaatccctccgagcgcgccacca	ArgCCG	20a	D-loop	T	0	4.73319	437.667	14.4368	D	NaBH4
B. subtilis	30	cluster18	gcgctcgtagctcagttggatagagcggtggtttccggtaccacgtctgtcgggggttcgaatccctccgagcgcgccacca	ArgCCG	20a	D-loop	T	0	4.80453	778.333	26.9025	D	NaBH4
B. subtilis	30	cluster18	gcgctcgtagctcagttggatagagcggtggtttccggtaccacgtctgtcgggggttcgaatccctccgagcgcgccacca	ArgCCG	17	D-loop	T	0	4.72911	527.333	26.1419	D	NaBH4
B. subtilis	37	cluster18	gcgctcgtagctcagttggatagagcggtggtttccggtaccacgtctgtcgggggttcgaatccctccgagcgcgccacca	ArgCCG	20a	D-loop	T	0	4.19331	555	31.8981	D	NaBH4
B. subtilis	37	cluster18	gcgctcgtagctcagttggatagagcggtggtttccggtaccacgtctgtcgggggttcgaatccctccgagcgcgccacca	ArgCCG	17	D-loop	T	0	3.90013	221	19.0975	D	NaBH4
B. subtilis	20	cluster19	gcgcccgtagctcaattggatagagcgtttgactacggatcaaaaggttaggggttcgactcctctcgggcgcgccacca	ArgACG	17	D-loop	T	0	5.75722	2151.33	43.2057	D	NaBH4
B. subtilis	20	cluster19	gcgcccgtagctcaattggatagagcgtttgactacggatcaaaaggttaggggttcgactcctctcgggcgcgccacca	ArgACG	20a	D-loop	T	0	4.20049	1379.67	18.8215	D	NaBH4
B. subtilis	30	cluster19	gcgcccgtagctcaattggatagagcgtttgactacggatcaaaaggttaggggttcgactcctctcgggcgcgccacca	ArgACG	17	D-loop	T	0	5.24856	2490.67	76.7842	D	NaBH4
B. subtilis	30	cluster19	gcgcccgtagctcaattggatagagcgtttgactacggatcaaaaggttaggggttcgactcctctcgggcgcgccacca	ArgACG	20a	D-loop	T	0	4.07338	1905.33	35.1215	D	NaBH4
B. subtilis	37	cluster19	gcgcccgtagctcaattggatagagcgtttgactacggatcaaaaggttaggggttcgactcctctcgggcgcgccacca	ArgACG	47	V-region	T	0	3.31479	643.333	2.47058	D	NaBH4
B. subtilis	37	cluster19	gcgcccgtagctcaattggatagagcgtttgactacggatcaaaaggttaggggttcgactcctctcgggcgcgccacca	ArgACG	17	D-loop	T	0	4.52645	849	67.903	D	NaBH4
B. subtilis	37	cluster19	gcgcccgtagctcaattggatagagcgtttgactacggatcaaaaggttaggggttcgactcctctcgggcgcgccacca	ArgACG	20a	D-loop	T	0	3.95145	1025.67	43.3521	D	NaBH4
B. subtilis	20	cluster2	gccggtgtggcggaattggcagacgcgcacgactcaaaatcgtgttccttctggagtgtcggttcgaccccgaccaccggtaccacca	LeuCAA	17	D-loop	T	0	5.77581	1476.67	32.9738	D	NaBH4
B. subtilis	20	cluster2	gccggtgtggcggaattggcagacgcgcacgactcaaaatcgtgttccttctggagtgtcggttcgaccccgaccaccggtaccacca	LeuCAA	16	D-loop	T	1.1372658286482e-09	1.86418	114.667	5.09164	D	NaBH4
B. subtilis	30	cluster2	gccggtgtggcggaattggcagacgcgcacgactcaaaatcgtgttccttctggagtgtcggttcgaccccgaccaccggtaccacca	LeuCAA	17	D-loop	T	0	5.21724	1442	62.9268	D	NaBH4
B. subtilis	30	cluster2	gccggtgtggcggaattggcagacgcgcacgactcaaaatcgtgttccttctggagtgtcggttcgaccccgaccaccggtaccacca	LeuCAA	16	D-loop	T	0.00334012	1.23837	102.333	13.9656	D	NaBH4
B. subtilis	37	cluster2	gccggtgtggcggaattggcagacgcgcacgactcaaaatcgtgttccttctggagtgtcggttcgaccccgaccaccggtaccacca	LeuCAA	17	D-loop	T	0	4.5456	516	43.4502	D	NaBH4
B. subtilis	20	cluster20	ggcggcatagccaagtggtaaggcagaggtctgcaaaacctttatccccggttcgaatccgggtgtcgcctccacca	CysGCA	16	D-loop	T	0.00398698	1.13732	70	2.78519	D	NaBH4
B. subtilis	20	cluster20	ggcggcatagccaagtggtaaggcagaggtctgcaaaacctttatccccggttcgaatccgggtgtcgcctccacca	CysGCA	20	D-loop	T	1.54271314227649e-10	1.79285	168	5.3356	D	NaBH4
B. subtilis	30	cluster20	ggcggcatagccaagtggtaaggcagaggtctgcaaaacctttatccccggttcgaatccgggtgtcgcctccacca	CysGCA	20	D-loop	T	9.13259885237961e-13	2.36755	235.333	10.7825	D	NaBH4
B. subtilis	37	cluster20	ggcggcatagccaagtggtaaggcagaggtctgcaaaacctttatccccggttcgaatccgggtgtcgcctccacca	CysGCA	20	D-loop	T	1.84100443469918e-08	2.22693	99.6667	12.4501	D	NaBH4
B. subtilis	20	cluster22	gcgggtgtagtttagtggtaaaacctcagccttccaagctgatgtcgtgagttcgattctcatcacccgctccacca	GlyTCC-1	20	D-loop	T	0	4.48147	1528.67	39.6608	D	NaBH4
B. subtilis	30	cluster22	gcgggtgtagtttagtggtaaaacctcagccttccaagctgatgtcgtgagttcgattctcatcacccgctccacca	GlyTCC-1	20	D-loop	T	0	4.47233	6149.67	70.4321	D	NaBH4
B. subtilis	37	cluster22	gcgggtgtagtttagtggtaaaacctcagccttccaagctgatgtcgtgagttcgattctcatcacccgctccacca	GlyTCC-1	20	D-loop	T	0	3.76228	2151.67	69.7877	D	NaBH4
B. subtilis	20	cluster23	ggtccggtagttcagttggttagaatgcctgcctgtcacgcaggaggtcgcgggttcgagtcccgtccggaccgccacca	AspGTC	17	D-loop	T	0	3.77693	2569	42.7498	D	NaBH4
B. subtilis	20	cluster23	ggtccggtagttcagttggttagaatgcctgcctgtcacgcaggaggtcgcgggttcgagtcccgtccggaccgccacca	AspGTC	20	D-loop	T	0	5.97051	11886.7	48.9005	D	NaBH4
B. subtilis	20	cluster23	ggtccggtagttcagttggttagaatgcctgcctgtcacgcaggaggtcgcgggttcgagtcccgtccggaccgccacca	AspGTC	20a	D-loop	T	0	4.16272	2915.67	9.96803	D	NaBH4
B. subtilis	30	cluster23	ggtccggtagttcagttggttagaatgcctgcctgtcacgcaggaggtcgcgggttcgagtcccgtccggaccgccacca	AspGTC	17	D-loop	T	0	2.91065	2834.33	70.5791	D	NaBH4
B. subtilis	30	cluster23	ggtccggtagttcagttggttagaatgcctgcctgtcacgcaggaggtcgcgggttcgagtcccgtccggaccgccacca	AspGTC	20a	D-loop	T	0	3.34678	4347.33	13.5834	D	NaBH4
B. subtilis	30	cluster23	ggtccggtagttcagttggttagaatgcctgcctgtcacgcaggaggtcgcgggttcgagtcccgtccggaccgccacca	AspGTC	20	D-loop	T	0	5.4203	23322.7	84.4329	D	NaBH4
B. subtilis	37	cluster23	ggtccggtagttcagttggttagaatgcctgcctgtcacgcaggaggtcgcgggttcgagtcccgtccggaccgccacca	AspGTC	17	D-loop	T	0	2.30338	1325.33	62.1886	D	NaBH4
B. subtilis	37	cluster23	ggtccggtagttcagttggttagaatgcctgcctgtcacgcaggaggtcgcgggttcgagtcccgtccggaccgccacca	AspGTC	20a	D-loop	T	0	2.9485	3303.67	15.9222	D	NaBH4
B. subtilis	37	cluster23	ggtccggtagttcagttggttagaatgcctgcctgtcacgcaggaggtcgcgggttcgagtcccgtccggaccgccacca	AspGTC	20	D-loop	T	0	4.79866	14413	87.0081	D	NaBH4
B. subtilis	20	cluster25	gcgggtgtagtttagtggtaaaacctcagccttccaagctgatgtcgtgggttcgattcccatcacccgctccacca	GlyTCC-2	20	D-loop	T	0	5.23536	1160	39.064	D	NaBH4
B. subtilis	30	cluster25	gcgggtgtagtttagtggtaaaacctcagccttccaagctgatgtcgtgggttcgattcccatcacccgctccacca	GlyTCC-2	20	D-loop	T	0	4.74794	3013.67	70.2594	D	NaBH4
B. subtilis	37	cluster25	gcgggtgtagtttagtggtaaaacctcagccttccaagctgatgtcgtgggttcgattcccatcacccgctccacca	GlyTCC-2	20	D-loop	T	0	3.7022	1269	70.2118	D	NaBH4
B. subtilis	20	cluster26	ggagaagtactcaagtggctgaagaggcgcccctgctaagggtgtaggtcgcgtaagcggcgcgagggttcaaatccctccttctccgccacca	SerGCT-1	20a	D-loop	T	0	3.97553	469.667	21.7836	D	NaBH4
B. subtilis	30	cluster26	ggagaagtactcaagtggctgaagaggcgcccctgctaagggtgtaggtcgcgtaagcggcgcgagggttcaaatccctccttctccgccacca	SerGCT-1	20a	D-loop	T	0	4.37814	1028.33	59.8354	D	NaBH4
B. subtilis	37	cluster26	ggagaagtactcaagtggctgaagaggcgcccctgctaagggtgtaggtcgcgtaagcggcgcgagggttcaaatccctccttctccgccacca	SerGCT-1	20a	D-loop	T	0	4.24091	443.333	33.8067	D	NaBH4
B. subtilis	20	cluster27	ggggccatagctcagctgggagagcgctacgctggcagcgtagaggtcaggggttcgagcccccttggctccaccacca	AlaGGC	17	D-loop	T	0	3.5918	142.333	6.08127	D	NaBH4
B. subtilis	30	cluster27	ggggccatagctcagctgggagagcgctacgctggcagcgtagaggtcaggggttcgagcccccttggctccaccacca	AlaGGC	17	D-loop	T	0	3.52405	499.333	12.8495	D	NaBH4
B. subtilis	37	cluster27	ggggccatagctcagctgggagagcgctacgctggcagcgtagaggtcaggggttcgagcccccttggctccaccacca	AlaGGC	17	D-loop	T	1.2621169618106e-12	2.25483	174.667	10.4614	D	NaBH4
B. subtilis	37	cluster27	ggggccatagctcagctgggagagcgctacgctggcagcgtagaggtcaggggttcgagcccccttggctccaccacca	AlaGGC	47	V-region	T	2.35651096629979e-09	2.34216	98	2.06289	D	NaBH4
B. subtilis	20	cluster28	gggcctgtagctcagctggttagagcgcacgcctgataagcgtgaggtcgatggttcgagtccattcaggcccaccacca	IleGAT-2	20a	D-loop	T	0	3.87014	758.667	16.9695	D	NaBH4
B. subtilis	20	cluster28	gggcctgtagctcagctggttagagcgcacgcctgataagcgtgaggtcgatggttcgagtccattcaggcccaccacca	IleGAT-2	17	D-loop	T	0	2.90518	399.667	47.9512	D	NaBH4
B. subtilis	20	cluster28	gggcctgtagctcagctggttagagcgcacgcctgataagcgtgaggtcgatggttcgagtccattcaggcccaccacca	IleGAT-2	20	D-loop	T	0	4.93865	1563.33	47.1576	D	NaBH4
B. subtilis	30	cluster28	gggcctgtagctcagctggttagagcgcacgcctgataagcgtgaggtcgatggttcgagtccattcaggcccaccacca	IleGAT-2	20a	D-loop	T	0	3.81275	2135.67	26.3293	D	NaBH4
B. subtilis	30	cluster28	gggcctgtagctcagctggttagagcgcacgcctgataagcgtgaggtcgatggttcgagtccattcaggcccaccacca	IleGAT-2	17	D-loop	T	0	2.47069	714.667	79.6947	D	NaBH4
B. subtilis	30	cluster28	gggcctgtagctcagctggttagagcgcacgcctgataagcgtgaggtcgatggttcgagtccattcaggcccaccacca	IleGAT-2	20	D-loop	T	0	5.00315	4924.33	82.4014	D	NaBH4
B. subtilis	37	cluster28	gggcctgtagctcagctggttagagcgcacgcctgataagcgtgaggtcgatggttcgagtccattcaggcccaccacca	IleGAT-2	20a	D-loop	T	0	2.92658	1564.67	27.2311	D	NaBH4
B. subtilis	37	cluster28	gggcctgtagctcagctggttagagcgcacgcctgataagcgtgaggtcgatggttcgagtccattcaggcccaccacca	IleGAT-2	17	D-loop	T	0	1.90481	413.667	70.081	D	NaBH4
B. subtilis	37	cluster28	gggcctgtagctcagctggttagagcgcacgcctgataagcgtgaggtcgatggttcgagtccattcaggcccaccacca	IleGAT-2	20	D-loop	T	0	4.32015	3494.33	84.5565	D	NaBH4
B. subtilis	20	cluster29	ggaggattagctcagctgggagagcatctgccttacaagcagagggtcggcggttcgagcccgtcatcctccaccacca	ValTAC	17	D-loop	T	0	3.19407	285	7.17867	D	NaBH4
B. subtilis	30	cluster29	ggaggattagctcagctgggagagcatctgccttacaagcagagggtcggcggttcgagcccgtcatcctccaccacca	ValTAC	17	D-loop	T	0	2.7792	919.667	13.2394	D	NaBH4
B. subtilis	37	cluster29	ggaggattagctcagctgggagagcatctgccttacaagcagagggtcggcggttcgagcccgtcatcctccaccacca	ValTAC	17	D-loop	T	0	2.34659	317.333	11.1476	D	NaBH4
B. subtilis	37	cluster29	ggaggattagctcagctgggagagcatctgccttacaagcagagggtcggcggttcgagcccgtcatcctccaccacca	ValTAC	47	V-region	T	2.87090142319316e-11	2.20163	173.333	2.20211	D	NaBH4
B. subtilis	20	cluster31	gccggggtggtggaattggcagacacacaggacttaaaatcctgcggtaggtgactaccgtgccggttcaagtccggccctcggcaccacca	LeuTAA	17	D-loop	T	0	5.68789	246.333	31.6435	D	NaBH4
B. subtilis	30	cluster31	gccggggtggtggaattggcagacacacaggacttaaaatcctgcggtaggtgactaccgtgccggttcaagtccggccctcggcaccacca	LeuTAA	17	D-loop	T	0	3.21143	123	77.4649	D	NaBH4
B. subtilis	37	cluster31	gccggggtggtggaattggcagacacacaggacttaaaatcctgcggtaggtgactaccgtgccggttcaagtccggccctcggcaccacca	LeuTAA	17	D-loop	T	0	1.70987	22.3333	54.6384	D	NaBH4
B. subtilis	20	cluster32	ggacctttagctcagttggttagagcagacggctcataaccgtccggtcgtaggttcgagtcctacaaggtccaccacca	MetCAT-2	17	D-loop	T	0	2.49911	36.6667	46.9044	D	NaBH4
B. subtilis	20	cluster32	ggacctttagctcagttggttagagcagacggctcataaccgtccggtcgtaggttcgagtcctacaaggtccaccacca	MetCAT-2	20	D-loop	T	0	3.36958	57.6667	31.5913	D	NaBH4
B. subtilis	20	cluster32	ggacctttagctcagttggttagagcagacggctcataaccgtccggtcgtaggttcgagtcctacaaggtccaccacca	MetCAT-2	20a	D-loop	T	0	2.59772	37	15.7237	D	NaBH4
B. subtilis	30	cluster32	ggacctttagctcagttggttagagcagacggctcataaccgtccggtcgtaggttcgagtcctacaaggtccaccacca	MetCAT-2	17	D-loop	T	0	2.05376	53.6667	80.6124	D	NaBH4
B. subtilis	30	cluster32	ggacctttagctcagttggttagagcagacggctcataaccgtccggtcgtaggttcgagtcctacaaggtccaccacca	MetCAT-2	20	D-loop	T	0	3.38584	118	58.6017	D	NaBH4
B. subtilis	30	cluster32	ggacctttagctcagttggttagagcagacggctcataaccgtccggtcgtaggttcgagtcctacaaggtccaccacca	MetCAT-2	20a	D-loop	T	0	2.35399	59.3333	22.9142	D	NaBH4
B. subtilis	37	cluster32	ggacctttagctcagttggttagagcagacggctcataaccgtccggtcgtaggttcgagtcctacaaggtccaccacca	MetCAT-2	17	D-loop	T	0	1.57507	24.3333	71.016	D	NaBH4
B. subtilis	37	cluster32	ggacctttagctcagttggttagagcagacggctcataaccgtccggtcgtaggttcgagtcctacaaggtccaccacca	MetCAT-2	20	D-loop	T	0	3.40075	70.6667	66.0056	D	NaBH4
B. subtilis	37	cluster32	ggacctttagctcagttggttagagcagacggctcataaccgtccggtcgtaggttcgagtcctacaaggtccaccacca	MetCAT-2	20a	D-loop	T	0	2.17341	41	26.927	D	NaBH4
B. subtilis	20	cluster33	tccgcagtagctcagtggtagagctatcggctgttaaccgatcggtcgtaggttcgaatcctacctgcggagccacca	AsnGTT-2	20	D-loop	T	0	3.73569	468	5.54763	D	NaBH4
B. subtilis	30	cluster33	tccgcagtagctcagtggtagagctatcggctgttaaccgatcggtcgtaggttcgaatcctacctgcggagccacca	AsnGTT-2	20	D-loop	T	0	3.30933	1068.33	9.72414	D	NaBH4
B. subtilis	37	cluster33	tccgcagtagctcagtggtagagctatcggctgttaaccgatcggtcgtaggttcgaatcctacctgcggagccacca	AsnGTT-2	47	V-region	T	0	2.95239	476.333	2.7166	D	NaBH4
B. subtilis	37	cluster33	tccgcagtagctcagtggtagagctatcggctgttaaccgatcggtcgtaggttcgaatcctacctgcggagccacca	AsnGTT-2	20	D-loop	T	0	3.25288	809.667	12.4302	D	NaBH4
B. subtilis	20	cluster34	ggaggaatacccaagtccggctgaagggatcggtcttgaaaaccgacaggggtgtcaaagcccgcgggggttcgaatccctcttcctccgccacca	SerTGA-2	20a	D-loop	T	0	3.05055	388.333	26.0314	D	NaBH4
B. subtilis	30	cluster34	ggaggaatacccaagtccggctgaagggatcggtcttgaaaaccgacaggggtgtcaaagcccgcgggggttcgaatccctcttcctccgccacca	SerTGA-2	20a	D-loop	T	0	3.88069	1434.33	61.9394	D	NaBH4
B. subtilis	37	cluster34	ggaggaatacccaagtccggctgaagggatcggtcttgaaaaccgacaggggtgtcaaagcccgcgggggttcgaatccctcttcctccgccacca	SerTGA-2	20a	D-loop	T	0	3.75321	476	37.8814	D	NaBH4
B. subtilis	20	cluster35	gagccattagctcagttggtagagcatctgacttttaatcagagggtcgaaggttcgagtccttcatggctcaccacca	LysTTT	16	D-loop	T	0	3.7698	131	19.0866	D	NaBH4
B. subtilis	20	cluster35	gagccattagctcagttggtagagcatctgacttttaatcagagggtcgaaggttcgagtccttcatggctcaccacca	LysTTT	20	D-loop	T	0	4.62283	182.667	11.3671	D	NaBH4
B. subtilis	20	cluster35	gagccattagctcagttggtagagcatctgacttttaatcagagggtcgaaggttcgagtccttcatggctcaccacca	LysTTT	17	D-loop	T	0	5.91655	399.667	30.9969	D	NaBH4
B. subtilis	30	cluster35	gagccattagctcagttggtagagcatctgacttttaatcagagggtcgaaggttcgagtccttcatggctcaccacca	LysTTT	16	D-loop	T	0	3.92648	319.667	38.088	D	NaBH4
B. subtilis	30	cluster35	gagccattagctcagttggtagagcatctgacttttaatcagagggtcgaaggttcgagtccttcatggctcaccacca	LysTTT	17	D-loop	T	0	5.69908	876.667	51.3406	D	NaBH4
B. subtilis	30	cluster35	gagccattagctcagttggtagagcatctgacttttaatcagagggtcgaaggttcgagtccttcatggctcaccacca	LysTTT	20	D-loop	T	0	4.70234	383	17.902	D	NaBH4
B. subtilis	37	cluster35	gagccattagctcagttggtagagcatctgacttttaatcagagggtcgaaggttcgagtccttcatggctcaccacca	LysTTT	16	D-loop	T	0	3.51975	173.667	38.7779	D	NaBH4
B. subtilis	37	cluster35	gagccattagctcagttggtagagcatctgacttttaatcagagggtcgaaggttcgagtccttcatggctcaccacca	LysTTT	17	D-loop	T	0	4.64896	276.333	36.6019	D	NaBH4
B. subtilis	37	cluster35	gagccattagctcagttggtagagcatctgacttttaatcagagggtcgaaggttcgagtccttcatggctcaccacca	LysTTT	20	D-loop	T	0	4.35515	206.333	22.0213	D	NaBH4
B. subtilis	20	cluster36	gcgggtgtggcggaattggcagacgcgctagacttaggatctagtgtctttatgacgtgggggttcaagtcccttcacccgcaccacca	LeuTAG-2	17	D-loop	T	0	5.74488	665.333	32.2032	D	NaBH4
B. subtilis	20	cluster36	gcgggtgtggcggaattggcagacgcgctagacttaggatctagtgtctttatgacgtgggggttcaagtcccttcacccgcaccacca	LeuTAG-2	16	D-loop	T	2.43483915200447e-11	2.42548	83.3333	7.64884	D	NaBH4
B. subtilis	30	cluster36	gcgggtgtggcggaattggcagacgcgctagacttaggatctagtgtctttatgacgtgggggttcaagtcccttcacccgcaccacca	LeuTAG-2	16	D-loop	T	3.70627516115207e-05	1.96627	84	15.7239	D	NaBH4
B. subtilis	30	cluster36	gcgggtgtggcggaattggcagacgcgctagacttaggatctagtgtctttatgacgtgggggttcaagtcccttcacccgcaccacca	LeuTAG-2	17	D-loop	T	0	5.01261	618.333	53.1506	D	NaBH4
B. subtilis	37	cluster36	gcgggtgtggcggaattggcagacgcgctagacttaggatctagtgtctttatgacgtgggggttcaagtcccttcacccgcaccacca	LeuTAG-2	16	D-loop	T	4.070888791578e-05	2.11527	47	13.5884	D	NaBH4
B. subtilis	37	cluster36	gcgggtgtggcggaattggcagacgcgctagacttaggatctagtgtctttatgacgtgggggttcaagtcccttcacccgcaccacca	LeuTAG-2	17	D-loop	T	0	4.57968	223.333	36.626	D	NaBH4
B. subtilis	20	cluster37	tgggctatagccaagcggtaaggcaacggactttgactccgtcatgcgttggttcgaatccagctagcccagccacca	GlnTTG-2	20	D-loop	T	0	1.84427	599.333	10.7144	D	NaBH4
B. subtilis	30	cluster37	tgggctatagccaagcggtaaggcaacggactttgactccgtcatgcgttggttcgaatccagctagcccagccacca	GlnTTG-2	20	D-loop	T	0	1.73601	1199.33	16.0474	D	NaBH4
B. subtilis	20	cluster38	ggcccgttggtcaagcggttaagacaccgccctttcacggcggtaacacgggttcgaatcccgtacgggtcaccacca	GluTTC	20	D-loop	T	0	1.68621	7838.33	50.6629	D	NaBH4
B. subtilis	20	cluster38	ggcccgttggtcaagcggttaagacaccgccctttcacggcggtaacacgggttcgaatcccgtacgggtcaccacca	GluTTC	20a	D-loop	T	0	5.15297	9492.33	31.635	D	NaBH4
B. subtilis	30	cluster38	ggcccgttggtcaagcggttaagacaccgccctttcacggcggtaacacgggttcgaatcccgtacgggtcaccacca	GluTTC	20	D-loop	T	0	1.41384	21241	80.7117	D	NaBH4
B. subtilis	30	cluster38	ggcccgttggtcaagcggttaagacaccgccctttcacggcggtaacacgggttcgaatcccgtacgggtcaccacca	GluTTC	20a	D-loop	T	0	5.17166	31794	54.7138	D	NaBH4
B. subtilis	37	cluster38	ggcccgttggtcaagcggttaagacaccgccctttcacggcggtaacacgggttcgaatcccgtacgggtcaccacca	GluTTC	20	D-loop	T	0	1.50269	13654	83.1347	D	NaBH4
B. subtilis	37	cluster38	ggcccgttggtcaagcggttaagacaccgccctttcacggcggtaacacgggttcgaatcccgtacgggtcaccacca	GluTTC	20a	D-loop	T	0	4.96795	19925	54.927	D	NaBH4
B. subtilis	20	cluster39	ggctcggtagctcagttggtagagcaacggactgaaaatccgtgtgtcggcggttcgattccgtcccgagccaccacca	PheGAA	17	D-loop	T	0	3.16477	41	7.51623	D	NaBH4
B. subtilis	20	cluster39	ggctcggtagctcagttggtagagcaacggactgaaaatccgtgtgtcggcggttcgattccgtcccgagccaccacca	PheGAA	20	D-loop	T	0	3.57231	58.3333	9.01619	D	NaBH4
B. subtilis	30	cluster39	ggctcggtagctcagttggtagagcaacggactgaaaatccgtgtgtcggcggttcgattccgtcccgagccaccacca	PheGAA	20	D-loop	T	0	3.45415	156.333	24.2168	D	NaBH4
B. subtilis	30	cluster39	ggctcggtagctcagttggtagagcaacggactgaaaatccgtgtgtcggcggttcgattccgtcccgagccaccacca	PheGAA	17	D-loop	T	0	3.05317	104	21.8047	D	NaBH4
B. subtilis	37	cluster39	ggctcggtagctcagttggtagagcaacggactgaaaatccgtgtgtcggcggttcgattccgtcccgagccaccacca	PheGAA	20	D-loop	T	1.00662480895326e-13	3.12893	101.667	35.7191	D	NaBH4
B. subtilis	37	cluster39	ggctcggtagctcagttggtagagcaacggactgaaaatccgtgtgtcggcggttcgattccgtcccgagccaccacca	PheGAA	17	D-loop	T	0	1.60667	27.6667	15.8862	D	NaBH4
B. subtilis	20	cluster40	gattccgtagctcagctgggagagcgctaccttgacagggtagaggtcgctggttcgagcccagtcggaatcaccacca	ValGAC	17	D-loop	T	0	3.0235	121	4.93795	D	NaBH4
B. subtilis	30	cluster40	gattccgtagctcagctgggagagcgctaccttgacagggtagaggtcgctggttcgagcccagtcggaatcaccacca	ValGAC	17	D-loop	T	4.33715935794614e-12	2.1943	292	7.31209	D	NaBH4
B. subtilis	37	cluster40	gattccgtagctcagctgggagagcgctaccttgacagggtagaggtcgctggttcgagcccagtcggaatcaccacca	ValGAC	17	D-loop	T	2.35307116873194e-07	1.89949	133.333	7.75093	D	NaBH4
B. subtilis	37	cluster40	gattccgtagctcagctgggagagcgctaccttgacagggtagaggtcgctggttcgagcccagtcggaatcaccacca	ValGAC	47	V-region	T	1.3395987474612e-07	2.09633	90.6667	2.14385	D	NaBH4
B. subtilis	20	cluster41	cgggaagtagctcagcttggtagagcacatggtttgggaccatggggtcgcaggttcgaatcctgtcttcccgaccacca	ProTGG	20	D-loop	T	0	4.50325	200.333	11.9049	D	NaBH4
B. subtilis	30	cluster41	cgggaagtagctcagcttggtagagcacatggtttgggaccatggggtcgcaggttcgaatcctgtcttcccgaccacca	ProTGG	20	D-loop	T	0	4.46395	799.333	23.1609	D	NaBH4
B. subtilis	37	cluster41	cgggaagtagctcagcttggtagagcacatggtttgggaccatggggtcgcaggttcgaatcctgtcttcccgaccacca	ProTGG	20	D-loop	T	0	4.29016	403	28.9138	D	NaBH4
B. subtilis	20	cluster42	ggcggtgtagctcagctggctagagcgtacggttcatacccgtgaggtcgggggttcgatcccctccgccgctaccacca	MetCAT-3	20a	D-loop	T	0	2.57316	641.667	8.35023	D	NaBH4
B. subtilis	20	cluster42	ggcggtgtagctcagctggctagagcgtacggttcatacccgtgaggtcgggggttcgatcccctccgccgctaccacca	MetCAT-3	17	D-loop	T	0	4.89589	1958	30.743	D	NaBH4
B. subtilis	30	cluster42	ggcggtgtagctcagctggctagagcgtacggttcatacccgtgaggtcgggggttcgatcccctccgccgctaccacca	MetCAT-3	20a	D-loop	T	0	3.33482	1120.67	18.5083	D	NaBH4
B. subtilis	30	cluster42	ggcggtgtagctcagctggctagagcgtacggttcatacccgtgaggtcgggggttcgatcccctccgccgctaccacca	MetCAT-3	17	D-loop	T	0	4.60268	2667.67	59.1414	D	NaBH4
B. subtilis	37	cluster42	ggcggtgtagctcagctggctagagcgtacggttcatacccgtgaggtcgggggttcgatcccctccgccgctaccacca	MetCAT-3	20a	D-loop	T	0	2.24711	526.667	21.5094	D	NaBH4
B. subtilis	37	cluster42	ggcggtgtagctcagctggctagagcgtacggttcatacccgtgaggtcgggggttcgatcccctccgccgctaccacca	MetCAT-3	17	D-loop	T	0	3.25732	1002.33	55.1688	D	NaBH4
B. subtilis	20	cluster5	gcggttgtggcgaagtggttaacgcaccagattgtggctctggcattcgtgggttcgattcccatcaatcgccccacca	HisGTG-2	20	D-loop	T	6.65478171256615e-14	1.83262	207	19.1425	D	NaBH4
B. subtilis	20	cluster5	gcggttgtggcgaagtggttaacgcaccagattgtggctctggcattcgtgggttcgattcccatcaatcgccccacca	HisGTG-2	20a	D-loop	T	0	2.78876	361.333	21.8458	D	NaBH4
B. subtilis	30	cluster5	gcggttgtggcgaagtggttaacgcaccagattgtggctctggcattcgtgggttcgattcccatcaatcgccccacca	HisGTG-2	20	D-loop	T	6.39436667513549e-06	1.24556	361	28.2949	D	NaBH4
B. subtilis	30	cluster5	gcggttgtggcgaagtggttaacgcaccagattgtggctctggcattcgtgggttcgattcccatcaatcgccccacca	HisGTG-2	20a	D-loop	T	0	2.77782	822.333	39.2576	D	NaBH4
B. subtilis	37	cluster5	gcggttgtggcgaagtggttaacgcaccagattgtggctctggcattcgtgggttcgattcccatcaatcgccccacca	HisGTG-2	20	D-loop	T	0.000337807	1.19715	134.667	27.5117	D	NaBH4
B. subtilis	37	cluster5	gcggttgtggcgaagtggttaacgcaccagattgtggctctggcattcgtgggttcgattcccatcaatcgccccacca	HisGTG-2	20a	D-loop	T	0	3.04394	395.667	45.8363	D	NaBH4
B. subtilis	20	cluster6	tccacagtagctcagtggtagagctatcggctgttaaccgatcggtcgcaggttcgaatcctgcctgtggagccacca	AsnGTT-1	20	D-loop	T	0	4.34317	488	6.18092	D	NaBH4
B. subtilis	30	cluster6	tccacagtagctcagtggtagagctatcggctgttaaccgatcggtcgcaggttcgaatcctgcctgtggagccacca	AsnGTT-1	20	D-loop	T	0	3.51317	1300.33	10.2802	D	NaBH4
B. subtilis	37	cluster6	tccacagtagctcagtggtagagctatcggctgttaaccgatcggtcgcaggttcgaatcctgcctgtggagccacca	AsnGTT-1	20	D-loop	T	0	3.30364	862.333	12.5806	D	NaBH4
B. subtilis	37	cluster6	tccacagtagctcagtggtagagctatcggctgttaaccgatcggtcgcaggttcgaatcctgcctgtggagccacca	AsnGTT-1	47	V-region	T	0	3.46209	435	2.69495	D	NaBH4
B. subtilis	20	cluster7	ggagaagtactcaagtggctgaagaggcgcccctgctaagggtgtaggtcgtgtaagcggcgcgagggttcaaatccctccttctccgccacca	SerGCT-2	20a	D-loop	T	0	3.49608	270.667	24.1354	D	NaBH4
B. subtilis	30	cluster7	ggagaagtactcaagtggctgaagaggcgcccctgctaagggtgtaggtcgtgtaagcggcgcgagggttcaaatccctccttctccgccacca	SerGCT-2	20a	D-loop	T	0	3.903	763.667	58.3041	D	NaBH4
B. subtilis	37	cluster7	ggagaagtactcaagtggctgaagaggcgcccctgctaagggtgtaggtcgtgtaagcggcgcgagggttcaaatccctccttctccgccacca	SerGCT-2	20a	D-loop	T	0	3.11135	277.667	34.5574	D	NaBH4
B. subtilis	20	cluster8	gccggtgtagctcaattggtagagcaactgacttgtaatcagtaggttgggggttcaagtcctcttgccggcaccacca	ThrTGT	16	D-loop	T	0	2.5747	826	7.73302	D	NaBH4
B. subtilis	20	cluster8	gccggtgtagctcaattggtagagcaactgacttgtaatcagtaggttgggggttcaagtcctcttgccggcaccacca	ThrTGT	20	D-loop	T	0	4.14276	1114	5.66605	D	NaBH4
B. subtilis	20	cluster8	gccggtgtagctcaattggtagagcaactgacttgtaatcagtaggttgggggttcaagtcctcttgccggcaccacca	ThrTGT	17	D-loop	T	0	6.18679	4505.67	25.8128	D	NaBH4
B. subtilis	30	cluster8	gccggtgtagctcaattggtagagcaactgacttgtaatcagtaggttgggggttcaagtcctcttgccggcaccacca	ThrTGT	17	D-loop	T	0	6.13563	6017.67	44.761	D	NaBH4
B. subtilis	30	cluster8	gccggtgtagctcaattggtagagcaactgacttgtaatcagtaggttgggggttcaagtcctcttgccggcaccacca	ThrTGT	16	D-loop	T	0	2.47097	1085.33	14.6353	D	NaBH4
B. subtilis	30	cluster8	gccggtgtagctcaattggtagagcaactgacttgtaatcagtaggttgggggttcaagtcctcttgccggcaccacca	ThrTGT	20	D-loop	T	0	4.81369	1948.67	12.2164	D	NaBH4
B. subtilis	37	cluster8	gccggtgtagctcaattggtagagcaactgacttgtaatcagtaggttgggggttcaagtcctcttgccggcaccacca	ThrTGT	17	D-loop	T	0	5.51029	3243	39.1656	D	NaBH4
B. subtilis	37	cluster8	gccggtgtagctcaattggtagagcaactgacttgtaatcagtaggttgggggttcaagtcctcttgccggcaccacca	ThrTGT	16	D-loop	T	0	1.93386	689.333	14.7379	D	NaBH4
B. subtilis	37	cluster8	gccggtgtagctcaattggtagagcaactgacttgtaatcagtaggttgggggttcaagtcctcttgccggcaccacca	ThrTGT	20	D-loop	T	0	4.39558	1276.67	13.5904	D	NaBH4
B. subtilis	20	cluster9	gcggatgtggcggaattggcagacgcgctagaatcaggctctagtgtctttacagacgtgggggttcaagtcccttcatccgcaccacca	LeuCAG	16	D-loop	T	0.000748475	1.42516	42.6667	5.03373	D	NaBH4
B. subtilis	20	cluster9	gcggatgtggcggaattggcagacgcgctagaatcaggctctagtgtctttacagacgtgggggttcaagtcccttcatccgcaccacca	LeuCAG	17	D-loop	T	0	4.91112	385.333	26.9909	D	NaBH4
B. subtilis	30	cluster9	gcggatgtggcggaattggcagacgcgctagaatcaggctctagtgtctttacagacgtgggggttcaagtcccttcatccgcaccacca	LeuCAG	17	D-loop	T	0	3.91294	424.333	44.4886	D	NaBH4
B. subtilis	37	cluster9	gcggatgtggcggaattggcagacgcgctagaatcaggctctagtgtctttacagacgtgggggttcaagtcccttcatccgcaccacca	LeuCAG	17	D-loop	T	0	3.3677	133.667	27.1786	D	NaBH4

## Sheet: G. stearothermophilus
Species	Temperature	Cluster ID	tRNA sequence	Anticodon	tRNA position	tRNA area	REF	adj. P value	Fold change	# RTs	% RTs	Modification	Treatment
G. stearothermophilus	55	cluster1	gcggaagtagttcagcggtagaacaccaccttgccaaggtgggggtcgcgggttcgagtcccgtcttccgctccacca	GlyGCC-1	8	after 5' ACC-stem	T	0.00882253	1.64419	29.6667	14.1969	s4U	NaBH4
G. stearothermophilus	70	cluster1	gcggaagtagttcagcggtagaacaccaccttgccaaggtgggggtcgcgggttcgagtcccgtcttccgctccacca	GlyGCC-1	8	after 5' ACC-stem	T	0.00991872	1.65793	35.3333	19.37	s4U	NaBH4
G. stearothermophilus	40	cluster11	aggggcatagtttaatggtagaacagaggtctccaaaacctccggtgtgggttcgattcctactgcccctgccacca	TrpCCA	8	after 5' ACC-stem	T	0	2.5914	194.667	36.518	s4U	NaBH4
G. stearothermophilus	55	cluster11	aggggcatagtttaatggtagaacagaggtctccaaaacctccggtgtgggttcgattcctactgcccctgccacca	TrpCCA	8	after 5' ACC-stem	T	3.0010079532918e-10	2.284	123.333	22.7513	s4U	NaBH4
G. stearothermophilus	70	cluster11	aggggcatagtttaatggtagaacagaggtctccaaaacctccggtgtgggttcgattcctactgcccctgccacca	TrpCCA	8	after 5' ACC-stem	T	0	2.54565	221.333	33.0875	s4U	NaBH4
G. stearothermophilus	40	cluster13	gggcctatagctcagctggtcagagcgcacgcctgataagcgtgaggtcggtggttcaagtccacttaggcccaccacca	IleGAT	8	after 5' ACC-stem	T	0	1.09672	1865	62.1193	s4U	NaBH4
G. stearothermophilus	55	cluster13	gggcctatagctcagctggtcagagcgcacgcctgataagcgtgaggtcggtggttcaagtccacttaggcccaccacca	IleGAT	8	after 5' ACC-stem	T	0	1.27095	2779.67	55.2241	s4U	NaBH4
G. stearothermophilus	40	cluster14	ggaggggtagcgaagtggctaaacgcggcggactgtaaatccgctccctttgggttcggcggttcgaatccgtccccctccaccacca	TyrGTA	8	after 5' ACC-stem	T	2.38754431971349e-05	1.58042	95	37.7114	s4U	NaBH4
G. stearothermophilus	55	cluster14	ggaggggtagcgaagtggctaaacgcggcggactgtaaatccgctccctttgggttcggcggttcgaatccgtccccctccaccacca	TyrGTA	8	after 5' ACC-stem	T	0.00159408	1.50035	37.3333	51.9939	s4U	NaBH4
G. stearothermophilus	70	cluster14	ggaggggtagcgaagtggctaaacgcggcggactgtaaatccgctccctttgggttcggcggttcgaatccgtccccctccaccacca	TyrGTA	8	after 5' ACC-stem	T	0	1.74656	35.6667	62.19	s4U	NaBH4
G. stearothermophilus	40	cluster15	ggggccttagctcagctgggagagcgcctgccccgcacgcaggaggtcatcggttcgaatccgataggctccaccacca	AlaCGC	8	after 5' ACC-stem	T	2.08770642556629e-06	1.14707	238	21.0908	s4U	NaBH4
G. stearothermophilus	55	cluster15	ggggccttagctcagctgggagagcgcctgccccgcacgcaggaggtcatcggttcgaatccgataggctccaccacca	AlaCGC	8	after 5' ACC-stem	T	4.33721633509249e-06	1.47795	143.333	19.7659	s4U	NaBH4
G. stearothermophilus	70	cluster15	ggggccttagctcagctgggagagcgcctgccccgcacgcaggaggtcatcggttcgaatccgataggctccaccacca	AlaCGC	8	after 5' ACC-stem	T	8.10405514386406e-06	1.28418	199.667	24.1977	s4U	NaBH4
G. stearothermophilus	40	cluster16	tgggccatagccaagcggtaaggcaacggactttgactccgtgatgcgctggttcgaatccagctggcccagccacca	GlnTTG-1	8	after 5' ACC-stem	T	0	4.42964	1783	16.4333	s4U	NaBH4
G. stearothermophilus	55	cluster16	tgggccatagccaagcggtaaggcaacggactttgactccgtgatgcgctggttcgaatccagctggcccagccacca	GlnTTG-1	8	after 5' ACC-stem	T	0	3.98348	963.667	6.17946	s4U	NaBH4
G. stearothermophilus	70	cluster16	tgggccatagccaagcggtaaggcaacggactttgactccgtgatgcgctggttcgaatccagctggcccagccacca	GlnTTG-1	8	after 5' ACC-stem	T	0	4.61218	1597.67	9.02197	s4U	NaBH4
G. stearothermophilus	40	cluster17	gcttccatagctcagtaggtagagcacttccatggtaaggaagaggtcaccggttcgagcccggttggaagctccacca	ThrGGT	8	after 5' ACC-stem	T	0.000329292	1.67197	35.3333	20.7708	s4U	NaBH4
G. stearothermophilus	55	cluster17	gcttccatagctcagtaggtagagcacttccatggtaaggaagaggtcaccggttcgagcccggttggaagctccacca	ThrGGT	8	after 5' ACC-stem	T	0	2.82164	244.667	18.9089	s4U	NaBH4
G. stearothermophilus	70	cluster17	gcttccatagctcagtaggtagagcacttccatggtaaggaagaggtcaccggttcgagcccggttggaagctccacca	ThrGGT	8	after 5' ACC-stem	T	0	2.01302	404	30.3694	s4U	NaBH4
G. stearothermophilus	40	cluster18	tgggctatagccaagcggtaaggcaacggactttgactccgtgatgcgctggttcgaatccagctagcccagccacca	GlnTTG-2	8	after 5' ACC-stem	T	0	3.44268	213.667	36.5287	s4U	NaBH4
G. stearothermophilus	55	cluster18	tgggctatagccaagcggtaaggcaacggactttgactccgtgatgcgctggttcgaatccagctagcccagccacca	GlnTTG-2	8	after 5' ACC-stem	T	2.58677644803714e-15	2.40528	178.667	20.2477	s4U	NaBH4
G. stearothermophilus	70	cluster18	tgggctatagccaagcggtaaggcaacggactttgactccgtgatgcgctggttcgaatccagctagcccagccacca	GlnTTG-2	8	after 5' ACC-stem	T	0	2.68912	457.667	31.3992	s4U	NaBH4
G. stearothermophilus	40	cluster19	gattccgtagctcagctgggagagcgccaccttgacagggtggaggtcgctggttcgagcccagtcggaatcaccacca	ValGAC	8	after 5' ACC-stem	T	6.57346017712452e-14	1.07886	680	11.8066	s4U	NaBH4
G. stearothermophilus	55	cluster19	gattccgtagctcagctgggagagcgccaccttgacagggtggaggtcgctggttcgagcccagtcggaatcaccacca	ValGAC	8	after 5' ACC-stem	T	0	2.29304	1187.67	20.0369	s4U	NaBH4
G. stearothermophilus	70	cluster19	gattccgtagctcagctgggagagcgccaccttgacagggtggaggtcgctggttcgagcccagtcggaatcaccacca	ValGAC	8	after 5' ACC-stem	T	0	2.24718	1108.33	32.0444	s4U	NaBH4
G. stearothermophilus	40	cluster20	gcgctcgtagctcaattggatagagcatctgactacggatcagaaggttaggggttcgaatcctctcgagcgcgccacca	ArgACG	8	after 5' ACC-stem	T	0	2.17142	336.333	33.1638	s4U	NaBH4
G. stearothermophilus	55	cluster20	gcgctcgtagctcaattggatagagcatctgactacggatcagaaggttaggggttcgaatcctctcgagcgcgccacca	ArgACG	8	after 5' ACC-stem	T	0	3.50626	276.667	17.9007	s4U	NaBH4
G. stearothermophilus	70	cluster20	gcgctcgtagctcaattggatagagcatctgactacggatcagaaggttaggggttcgaatcctctcgagcgcgccacca	ArgACG	8	after 5' ACC-stem	T	0	3.63356	880.333	47.3269	s4U	NaBH4
G. stearothermophilus	40	cluster21	gcggaagtagttcagtggtagaacaccaccttgccaaggtgggggtcgcgggttcgagtcccgtcttccgctccacca	GlyGCC-2	8	after 5' ACC-stem	T	5.15189430152379e-10	1.96063	158.667	23.8326	s4U	NaBH4
G. stearothermophilus	55	cluster21	gcggaagtagttcagtggtagaacaccaccttgccaaggtgggggtcgcgggttcgagtcccgtcttccgctccacca	GlyGCC-2	8	after 5' ACC-stem	T	2.16393656799774e-09	1.65671	217.333	10.8779	s4U	NaBH4
G. stearothermophilus	70	cluster21	gcggaagtagttcagtggtagaacaccaccttgccaaggtgggggtcgcgggttcgagtcccgtcttccgctccacca	GlyGCC-2	8	after 5' ACC-stem	T	8.8970266339435e-14	1.81448	372	20.2797	s4U	NaBH4
G. stearothermophilus	40	cluster22	ggtcccgtagtgtagtggttaacatgcctgcctgtcacgcaggagatcgcgggttcgagtcccgtcgggaccgccacca	AspGTC	8	after 5' ACC-stem	T	0	1.4604	984	28.3369	s4U	NaBH4
G. stearothermophilus	55	cluster23	tccgcaatagctcagcggtagagcaaccggctgttaaccggtaggtcgtaggttcgaatcctacttgcggagccacca	AsnGTT	8	after 5' ACC-stem	T	7.00546286112939e-08	1.03371	440.333	5.19369	s4U	NaBH4
G. stearothermophilus	40	cluster24	gcgggtgtagtttagtggtaaaacctcagccttccaagctgatgtcgtgggttcgattcccatcacccgctccacca	GlyTCC	8	after 5' ACC-stem	T	4.58527114445018e-05	1.10016	171.333	15.6076	s4U	NaBH4
G. stearothermophilus	55	cluster25	ggccccgtagctcagtggatagagcgtcggtttcctaaaccgtgcgtcggaggttcgaatcctctcggggccgccacca	ArgCCT	8	after 5' ACC-stem	T	0.00882253	1.41856	32.3333	19.559	s4U	NaBH4
G. stearothermophilus	40	cluster26	ggcggcatagccaagtggtaaggcagaggtctgcaaaacctttacccccggttcgaatccgggtgccgcctccacca	CysGCA	8	after 5' ACC-stem	T	0.000907614	1.46014	45.3333	19.4398	s4U	NaBH4
G. stearothermophilus	70	cluster26	ggcggcatagccaagtggtaaggcagaggtctgcaaaacctttacccccggttcgaatccgggtgccgcctccacca	CysGCA	8	after 5' ACC-stem	T	0.00991872	1.28104	34	28.8032	s4U	NaBH4
G. stearothermophilus	40	cluster27	gcggtcgtggcggaatggcagacgcgctaggttgagggcctagtgggggcaaccccgtggaggttcaagtcctctcgaccgcaccacca	LeuGAG	8	after 5' ACC-stem	T	2.73120925314011e-08	1.48723	196	13.4135	s4U	NaBH4
G. stearothermophilus	55	cluster27	gcggtcgtggcggaatggcagacgcgctaggttgagggcctagtgggggcaaccccgtggaggttcaagtcctctcgaccgcaccacca	LeuGAG	8	after 5' ACC-stem	T	4.44093490890558e-06	1.71735	116	15.672	s4U	NaBH4
G. stearothermophilus	70	cluster27	gcggtcgtggcggaatggcagacgcgctaggttgagggcctagtgggggcaaccccgtggaggttcaagtcctctcgaccgcaccacca	LeuGAG	8	after 5' ACC-stem	T	0.00015328	1.65413	71	10.4328	s4U	NaBH4
G. stearothermophilus	40	cluster28	ggggccttagctcagctgggagagcgcctgctttgcacgcaggaggtcatcggttcgatcccgataggctccaccacca	AlaTGC	8	after 5' ACC-stem	T	0	1.79302	1326.67	23.3688	s4U	NaBH4
G. stearothermophilus	55	cluster28	ggggccttagctcagctgggagagcgcctgctttgcacgcaggaggtcatcggttcgatcccgataggctccaccacca	AlaTGC	8	after 5' ACC-stem	T	0	2.41289	1239.33	19.0315	s4U	NaBH4
G. stearothermophilus	70	cluster28	ggggccttagctcagctgggagagcgcctgctttgcacgcaggaggtcatcggttcgatcccgataggctccaccacca	AlaTGC	8	after 5' ACC-stem	T	0	2.12267	1143.67	27.7206	s4U	NaBH4
G. stearothermophilus	40	cluster3	cgggaagtagctcagcttggtagagcacacggttcgggtccgtgaggtcgcaggttcaaatcctgtcttcccgaccacca	ProCGG	8	after 5' ACC-stem	T	0.000329292	1.45713	35.6667	11.1868	s4U	NaBH4
G. stearothermophilus	55	cluster3	cgggaagtagctcagcttggtagagcacacggttcgggtccgtgaggtcgcaggttcaaatcctgtcttcccgaccacca	ProCGG	8	after 5' ACC-stem	T	2.58677644803714e-15	2.54874	182.333	7.25387	s4U	NaBH4
G. stearothermophilus	70	cluster3	cgggaagtagctcagcttggtagagcacacggttcgggtccgtgaggtcgcaggttcaaatcctgtcttcccgaccacca	ProCGG	8	after 5' ACC-stem	T	0	2.12443	372.333	11.7456	s4U	NaBH4
G. stearothermophilus	40	cluster30	ggaggattagctcagctgggagagcacttgccttacaagcaaggggtcggcggttcgatcccgtcatcctccaccacca	ValTAC	8	after 5' ACC-stem	T	0	2.0064	664.333	27.5951	s4U	NaBH4
G. stearothermophilus	55	cluster30	ggaggattagctcagctgggagagcacttgccttacaagcaaggggtcggcggttcgatcccgtcatcctccaccacca	ValTAC	8	after 5' ACC-stem	T	0	1.6808	876.333	20.4854	s4U	NaBH4
G. stearothermophilus	70	cluster30	ggaggattagctcagctgggagagcacttgccttacaagcaaggggtcggcggttcgatcccgtcatcctccaccacca	ValTAC	8	after 5' ACC-stem	T	0	1.31019	1278.33	33.2704	s4U	NaBH4
G. stearothermophilus	40	cluster31	ggcccgttggtcaagtggttaagacaccgccctttcacggcggtaacacgggttcgaatcccgtacgggtcaccacca	GluTTC	8	after 5' ACC-stem	T	0	2.43071	1532.67	21.2656	s4U	NaBH4
G. stearothermophilus	55	cluster31	ggcccgttggtcaagtggttaagacaccgccctttcacggcggtaacacgggttcgaatcccgtacgggtcaccacca	GluTTC	8	after 5' ACC-stem	T	0	1.94226	897.333	11.275	s4U	NaBH4
G. stearothermophilus	55	cluster32	cgggatgtagctcagcttggtagagcacacgcatggggtgcgtggggtcgcaggttcaaatcctgtcatcccgaccacca	ProGGG	8	after 5' ACC-stem	T	0.00882253	1.22374	32.3333	10.1433	s4U	NaBH4
G. stearothermophilus	40	cluster33	gagccattagctcagtaggtagagcatctgacttttaatcagagggtcggaggttcgagtcctccatggctcaccacca	LysTTT	8	after 5' ACC-stem	T	0	2.76217	795.667	26.5149	s4U	NaBH4
G. stearothermophilus	55	cluster33	gagccattagctcagtaggtagagcatctgacttttaatcagagggtcggaggttcgagtcctccatggctcaccacca	LysTTT	8	after 5' ACC-stem	T	0	2.8596	666.333	23.585	s4U	NaBH4
G. stearothermophilus	70	cluster33	gagccattagctcagtaggtagagcatctgacttttaatcagagggtcggaggttcgagtcctccatggctcaccacca	LysTTT	8	after 5' ACC-stem	T	0	3.47854	312.333	38.3583	s4U	NaBH4
G. stearothermophilus	40	cluster34	gcgggtgtggcggaattggcagacgcgctagattcagggtctagtgccctttacgggcgtgggggttcgagtcccttcacccgcaccacca	LeuCAG	8	after 5' ACC-stem	T	2.35800934913703e-13	1.99967	225	20.4594	s4U	NaBH4
G. stearothermophilus	55	cluster34	gcgggtgtggcggaattggcagacgcgctagattcagggtctagtgccctttacgggcgtgggggttcgagtcccttcacccgcaccacca	LeuCAG	8	after 5' ACC-stem	T	0.0072483	1.014	68.6667	37.9064	s4U	NaBH4
G. stearothermophilus	40	cluster35	tggggtatagccaagcggtaaggcaacggactttgactccgtgatgcgttggttcgaatccagctaccccagccacca	GlnTTG-3	8	after 5' ACC-stem	T	0	2.46268	390.667	42.1133	s4U	NaBH4
G. stearothermophilus	55	cluster35	tggggtatagccaagcggtaaggcaacggactttgactccgtgatgcgttggttcgaatccagctaccccagccacca	GlnTTG-3	8	after 5' ACC-stem	T	1.61304480472715e-05	1.62293	124	23.885	s4U	NaBH4
G. stearothermophilus	70	cluster35	tggggtatagccaagcggtaaggcaacggactttgactccgtgatgcgttggttcgaatccagctaccccagccacca	GlnTTG-3	8	after 5' ACC-stem	T	5.05840800706662e-06	1.69095	134.667	38.7042	s4U	NaBH4
G. stearothermophilus	40	cluster36	cgcggggtggagcagtctggtagctcgtcgggctcataacccgaaggtcgcaggttcaaatcctgcccccgcaaccacca	MetCAT-1	8	after 5' ACC-stem	T	2.36301253568115e-05	1.05427	213	2.11633	s4U	NaBH4
G. stearothermophilus	55	cluster36	cgcggggtggagcagtctggtagctcgtcgggctcataacccgaaggtcgcaggttcaaatcctgcccccgcaaccacca	MetCAT-1	8	after 5' ACC-stem	T	1.52827089153611e-05	1.71695	101	2.12341	s4U	NaBH4
G. stearothermophilus	55	cluster37	ggcggtgtagctcagctggctagagcgtacggttcatacccgtgaggtcgggggttcgatcccctccaccgccaccacca	MetCAT-2	8	after 5' ACC-stem	T	6.00494597488536e-10	1.70164	221.333	17.9905	s4U	NaBH4
G. stearothermophilus	40	cluster39	gccggcttagctcaattggtagagcaactgacttgtaatcagtaggttgcgggttcaagtcctgcagccggcaccacca	ThrTGT	8	after 5' ACC-stem	T	0	2.45481	1098	23.543	s4U	NaBH4
G. stearothermophilus	55	cluster39	gccggcttagctcaattggtagagcaactgacttgtaatcagtaggttgcgggttcaagtcctgcagccggcaccacca	ThrTGT	8	after 5' ACC-stem	T	0	1.73839	479.667	13.7324	s4U	NaBH4
G. stearothermophilus	70	cluster39	gccggcttagctcaattggtagagcaactgacttgtaatcagtaggttgcgggttcaagtcctgcagccggcaccacca	ThrTGT	8	after 5' ACC-stem	T	0	1.9022	620.667	34.6743	s4U	NaBH4
G. stearothermophilus	40	cluster4	ggggcattagctcagttgggagagcgtcgtgctggcagcgcgaaggtcaccggttcgagcccggtatgctccaccacca	AlaGGC	8	after 5' ACC-stem	T	2.17090685963294e-05	1.57863	83.3333	17.0392	s4U	NaBH4
G. stearothermophilus	55	cluster4	ggggcattagctcagttgggagagcgtcgtgctggcagcgcgaaggtcaccggttcgagcccggtatgctccaccacca	AlaGGC	8	after 5' ACC-stem	T	0	2.62081	189	20.5982	s4U	NaBH4
G. stearothermophilus	70	cluster4	ggggcattagctcagttgggagagcgtcgtgctggcagcgcgaaggtcaccggttcgagcccggtatgctccaccacca	AlaGGC	8	after 5' ACC-stem	T	2.89690752006843e-15	2.23131	290.667	32.8117	s4U	NaBH4
G. stearothermophilus	55	cluster41	cgggaagtagctcagcttggcagagcacatggtttgggaccatggggtcgcaggttcaaatcctgtcttcccgaccacca	ProTGG	8	after 5' ACC-stem	T	1.35323572203919e-08	2.32561	91.3333	8.87078	s4U	NaBH4
G. stearothermophilus	70	cluster41	cgggaagtagctcagcttggcagagcacatggtttgggaccatggggtcgcaggttcaaatcctgtcttcccgaccacca	ProTGG	8	after 5' ACC-stem	T	3.23688146764755e-09	2.03475	172	16.2037	s4U	NaBH4
G. stearothermophilus	40	cluster43	ggaggagtacccaagtctggctgaaggggtcggtttcgaaaaccgataggggtgtcacagcccgcgggggttcgaatccctcctcctccgccacca	SerCGA-1	8	after 5' ACC-stem	T	0.00110954	1.47954	58	55.492	s4U	NaBH4
G. stearothermophilus	40	cluster44	gccgacttagctcaattggtagagcaactgaatcgtaatcagtaggttgcgggttcaagtcctgcagtcggcaccacca	ThrCGT-2	8	after 5' ACC-stem	T	0	2.65411	643.667	21.1973	s4U	NaBH4
G. stearothermophilus	55	cluster44	gccgacttagctcaattggtagagcaactgaatcgtaatcagtaggttgcgggttcaagtcctgcagtcggcaccacca	ThrCGT-2	8	after 5' ACC-stem	T	0	1.9619	474	11.9934	s4U	NaBH4
G. stearothermophilus	70	cluster44	gccgacttagctcaattggtagagcaactgaatcgtaatcagtaggttgcgggttcaagtcctgcagtcggcaccacca	ThrCGT-2	8	after 5' ACC-stem	T	4.81080567004151e-13	1.32071	595	29.8895	s4U	NaBH4
G. stearothermophilus	40	cluster5	ggaggaatacccaagtctggctgaagggggcggtttcgaaaaccgctaggggtgtcacagcccgcgggggttcgaatccctcttcctccgccacca	SerCGA-2	8	after 5' ACC-stem	T	0.000907614	1.49942	47.6667	80.0259	s4U	NaBH4
G. stearothermophilus	55	cluster6	gtcccagtagctcagtaggatagagcagcggccttctaagccgtcggtcgggagttcgagtctctcctgggacgccacca	ArgTCT	8	after 5' ACC-stem	T	1.06932623118299e-05	1.83179	86.6667	14.0593	s4U	NaBH4
G. stearothermophilus	70	cluster6	gtcccagtagctcagtaggatagagcagcggccttctaagccgtcggtcgggagttcgagtctctcctgggacgccacca	ArgTCT	8	after 5' ACC-stem	T	3.37635463735286e-13	2.02935	264	33.3343	s4U	NaBH4
G. stearothermophilus	40	cluster7	gccctcgtagtgtagtggatagcacgagagattccggttctcttagcgtgggttcgaatcctgccgagggcgccacca	ArgCCG	8	after 5' ACC-stem	T	4.09719165932214e-09	1.99088	127.333	8.19287	s4U	NaBH4
G. stearothermophilus	55	cluster7	gccctcgtagtgtagtggatagcacgagagattccggttctcttagcgtgggttcgaatcctgccgagggcgccacca	ArgCCG	8	after 5' ACC-stem	T	1.35323572203919e-08	2.15862	90.3333	9.53325	s4U	NaBH4
G. stearothermophilus	70	cluster7	gccctcgtagtgtagtggatagcacgagagattccggttctcttagcgtgggttcgaatcctgccgagggcgccacca	ArgCCG	8	after 5' ACC-stem	T	6.6992750705788e-05	1.64719	125.333	15.5551	s4U	NaBH4
G. stearothermophilus	40	cluster8	gccgacttagctcaattggtagagcaactgaatcgtaatcagtaggttgcgggttcgagtcctgcagtcggcaccacca	ThrCGT-1	8	after 5' ACC-stem	T	0	2.54338	272.333	15.2273	s4U	NaBH4
G. stearothermophilus	55	cluster8	gccgacttagctcaattggtagagcaactgaatcgtaatcagtaggttgcgggttcgagtcctgcagtcggcaccacca	ThrCGT-1	8	after 5' ACC-stem	T	0	2.25974	257.667	10.7027	s4U	NaBH4
G. stearothermophilus	70	cluster8	gccgacttagctcaattggtagagcaactgaatcgtaatcagtaggttgcgggttcgagtcctgcagtcggcaccacca	ThrCGT-1	8	after 5' ACC-stem	T	1.28153705242185e-09	1.48585	323	29.365	s4U	NaBH4
G. stearothermophilus	40	cluster9	ggctcggtagctcagtcggtagagcaaaggactgaaaatccttgtgtcggcggttcgattccgtcccgagccaccacca	PheGAA	8	after 5' ACC-stem	T	3.91280425783924e-07	1.75887	109	19.6713	s4U	NaBH4
G. stearothermophilus	55	cluster9	ggctcggtagctcagtcggtagagcaaaggactgaaaatccttgtgtcggcggttcgattccgtcccgagccaccacca	PheGAA	8	after 5' ACC-stem	T	0.00882253	1.76671	32.3333	12.2988	s4U	NaBH4
G. stearothermophilus	40	cluster13	gggcctatagctcagctggtcagagcgcacgcctgataagcgtgaggtcggtggttcaagtccacttaggcccaccacca	IleGAT	46	V-region	G	0	3.79212	3074.33	25.0913	m7G	NaBH4
G. stearothermophilus	55	cluster13	gggcctatagctcagctggtcagagcgcacgcctgataagcgtgaggtcggtggttcaagtccacttaggcccaccacca	IleGAT	46	V-region	G	0	4.06382	6644.67	18.1112	m7G	NaBH4
G. stearothermophilus	70	cluster13	gggcctatagctcagctggtcagagcgcacgcctgataagcgtgaggtcggtggttcaagtccacttaggcccaccacca	IleGAT	46	V-region	G	0	4.05228	6434.67	15.3706	m7G	NaBH4
G. stearothermophilus	40	cluster15	ggggccttagctcagctgggagagcgcctgccccgcacgcaggaggtcatcggttcgaatccgataggctccaccacca	AlaCGC	46	V-region	G	0	3.94961	1071.67	37.5561	m7G	NaBH4
G. stearothermophilus	55	cluster15	ggggccttagctcagctgggagagcgcctgccccgcacgcaggaggtcatcggttcgaatccgataggctccaccacca	AlaCGC	46	V-region	G	0	3.96761	545	34.0605	m7G	NaBH4
G. stearothermophilus	70	cluster15	ggggccttagctcagctgggagagcgcctgccccgcacgcaggaggtcatcggttcgaatccgataggctccaccacca	AlaCGC	46	V-region	G	0	4.13082	764.333	33.2425	m7G	NaBH4
G. stearothermophilus	40	cluster17	gcttccatagctcagtaggtagagcacttccatggtaaggaagaggtcaccggttcgagcccggttggaagctccacca	ThrGGT	46	V-region	G	0	3.14502	206	32.1366	m7G	NaBH4
G. stearothermophilus	55	cluster17	gcttccatagctcagtaggtagagcacttccatggtaaggaagaggtcaccggttcgagcccggttggaagctccacca	ThrGGT	46	V-region	G	0	4.80062	1076	26.5686	m7G	NaBH4
G. stearothermophilus	70	cluster17	gcttccatagctcagtaggtagagcacttccatggtaaggaagaggtcaccggttcgagcccggttggaagctccacca	ThrGGT	46	V-region	G	0	4.54305	1323	25.8733	m7G	NaBH4
G. stearothermophilus	40	cluster19	gattccgtagctcagctgggagagcgccaccttgacagggtggaggtcgctggttcgagcccagtcggaatcaccacca	ValGAC	46	V-region	G	0	5.58958	3170.33	20.5496	m7G	NaBH4
G. stearothermophilus	55	cluster19	gattccgtagctcagctgggagagcgccaccttgacagggtggaggtcgctggttcgagcccagtcggaatcaccacca	ValGAC	46	V-region	G	0	5.84215	3159.33	21.2252	m7G	NaBH4
G. stearothermophilus	70	cluster19	gattccgtagctcagctgggagagcgccaccttgacagggtggaggtcgctggttcgagcccagtcggaatcaccacca	ValGAC	46	V-region	G	0	5.52436	3092.67	26.4602	m7G	NaBH4
G. stearothermophilus	40	cluster20	gcgctcgtagctcaattggatagagcatctgactacggatcagaaggttaggggttcgaatcctctcgagcgcgccacca	ArgACG	46	V-region	G	0	5.9093	7451.67	32.5901	m7G	NaBH4
G. stearothermophilus	55	cluster20	gcgctcgtagctcaattggatagagcatctgactacggatcagaaggttaggggttcgaatcctctcgagcgcgccacca	ArgACG	46	V-region	G	0	6.59423	8888.33	30.391	m7G	NaBH4
G. stearothermophilus	70	cluster20	gcgctcgtagctcaattggatagagcatctgactacggatcagaaggttaggggttcgaatcctctcgagcgcgccacca	ArgACG	46	V-region	G	0	6.36854	13116.7	30.6428	m7G	NaBH4
G. stearothermophilus	40	cluster23	tccgcaatagctcagcggtagagcaaccggctgttaaccggtaggtcgtaggttcgaatcctacttgcggagccacca	AsnGTT	46	V-region	G	0	5.52489	11022.3	51.881	m7G	NaBH4
G. stearothermophilus	55	cluster23	tccgcaatagctcagcggtagagcaaccggctgttaaccggtaggtcgtaggttcgaatcctacttgcggagccacca	AsnGTT	46	V-region	G	0	5.85111	16805	45.2131	m7G	NaBH4
G. stearothermophilus	70	cluster23	tccgcaatagctcagcggtagagcaaccggctgttaaccggtaggtcgtaggttcgaatcctacttgcggagccacca	AsnGTT	46	V-region	G	0	5.32047	16787.3	41.3006	m7G	NaBH4
G. stearothermophilus	40	cluster25	ggccccgtagctcagtggatagagcgtcggtttcctaaaccgtgcgtcggaggttcgaatcctctcggggccgccacca	ArgCCT	46	V-region	G	4.20100093679235e-09	2.80867	63	15.4321	m7G	NaBH4
G. stearothermophilus	55	cluster25	ggccccgtagctcagtggatagagcgtcggtttcctaaaccgtgcgtcggaggttcgaatcctctcggggccgccacca	ArgCCT	46	V-region	G	0	2.59678	48.6667	12.5662	m7G	NaBH4
G. stearothermophilus	70	cluster25	ggccccgtagctcagtggatagagcgtcggtttcctaaaccgtgcgtcggaggttcgaatcctctcggggccgccacca	ArgCCT	46	V-region	G	4.13311025724006e-06	2.50067	63.6667	12.4376	m7G	NaBH4
G. stearothermophilus	40	cluster28	ggggccttagctcagctgggagagcgcctgctttgcacgcaggaggtcatcggttcgatcccgataggctccaccacca	AlaTGC	46	V-region	G	0	5.23935	6068	35.5455	m7G	NaBH4
G. stearothermophilus	55	cluster28	ggggccttagctcagctgggagagcgcctgctttgcacgcaggaggtcatcggttcgatcccgataggctccaccacca	AlaTGC	46	V-region	G	0	5.97958	6284.67	34.5641	m7G	NaBH4
G. stearothermophilus	70	cluster28	ggggccttagctcagctgggagagcgcctgctttgcacgcaggaggtcatcggttcgatcccgataggctccaccacca	AlaTGC	46	V-region	G	0	5.4972	6230.67	39.5844	m7G	NaBH4
G. stearothermophilus	40	cluster30	ggaggattagctcagctgggagagcacttgccttacaagcaaggggtcggcggttcgatcccgtcatcctccaccacca	ValTAC	46	V-region	G	0	4.16861	3060.67	34.8277	m7G	NaBH4
G. stearothermophilus	55	cluster30	ggaggattagctcagctgggagagcacttgccttacaagcaaggggtcggcggttcgatcccgtcatcctccaccacca	ValTAC	46	V-region	G	0	6.00592	4452.33	33.8744	m7G	NaBH4
G. stearothermophilus	70	cluster30	ggaggattagctcagctgggagagcacttgccttacaagcaaggggtcggcggttcgatcccgtcatcctccaccacca	ValTAC	46	V-region	G	0	5.40373	5965.33	35.6653	m7G	NaBH4
G. stearothermophilus	40	cluster32	cgggatgtagctcagcttggtagagcacacgcatggggtgcgtggggtcgcaggttcaaatcctgtcatcccgaccacca	ProGGG	46	V-region	G	0	4.04391	234	35.9516	m7G	NaBH4
G. stearothermophilus	55	cluster32	cgggatgtagctcagcttggtagagcacacgcatggggtgcgtggggtcgcaggttcaaatcctgtcatcccgaccacca	ProGGG	46	V-region	G	0	5.48434	432.333	36.2139	m7G	NaBH4
G. stearothermophilus	70	cluster32	cgggatgtagctcagcttggtagagcacacgcatggggtgcgtggggtcgcaggttcaaatcctgtcatcccgaccacca	ProGGG	46	V-region	G	0	5.06468	505	34.2484	m7G	NaBH4
G. stearothermophilus	40	cluster33	gagccattagctcagtaggtagagcatctgacttttaatcagagggtcggaggttcgagtcctccatggctcaccacca	LysTTT	46	V-region	G	0	5.04512	5757.33	24.9099	m7G	NaBH4
G. stearothermophilus	55	cluster33	gagccattagctcagtaggtagagcatctgacttttaatcagagggtcggaggttcgagtcctccatggctcaccacca	LysTTT	46	V-region	G	0	5.9036	9167.33	13.8046	m7G	NaBH4
G. stearothermophilus	70	cluster33	gagccattagctcagtaggtagagcatctgacttttaatcagagggtcggaggttcgagtcctccatggctcaccacca	LysTTT	46	V-region	G	0	6.12986	8652.33	13.1957	m7G	NaBH4
G. stearothermophilus	40	cluster36	cgcggggtggagcagtctggtagctcgtcgggctcataacccgaaggtcgcaggttcaaatcctgcccccgcaaccacca	MetCAT-1	46	V-region	G	0	5.44993	10804.3	44.3034	m7G	NaBH4
G. stearothermophilus	55	cluster36	cgcggggtggagcagtctggtagctcgtcgggctcataacccgaaggtcgcaggttcaaatcctgcccccgcaaccacca	MetCAT-1	46	V-region	G	0	5.73175	4099	35.8639	m7G	NaBH4
G. stearothermophilus	70	cluster36	cgcggggtggagcagtctggtagctcgtcgggctcataacccgaaggtcgcaggttcaaatcctgcccccgcaaccacca	MetCAT-1	46	V-region	G	0	5.75346	5452.67	40.7302	m7G	NaBH4
G. stearothermophilus	40	cluster37	ggcggtgtagctcagctggctagagcgtacggttcatacccgtgaggtcgggggttcgatcccctccaccgccaccacca	MetCAT-2	46	V-region	G	0	4.18501	1919.67	31.8018	m7G	NaBH4
G. stearothermophilus	55	cluster37	ggcggtgtagctcagctggctagagcgtacggttcatacccgtgaggtcgggggttcgatcccctccaccgccaccacca	MetCAT-2	46	V-region	G	0	5.05402	1833.67	27.4405	m7G	NaBH4
G. stearothermophilus	70	cluster37	ggcggtgtagctcagctggctagagcgtacggttcatacccgtgaggtcgggggttcgatcccctccaccgccaccacca	MetCAT-2	46	V-region	G	0	4.56558	2522.33	26.1285	m7G	NaBH4
G. stearothermophilus	40	cluster39	gccggcttagctcaattggtagagcaactgacttgtaatcagtaggttgcgggttcaagtcctgcagccggcaccacca	ThrTGT	46	V-region	G	0	5.41027	3695	33.0353	m7G	NaBH4
G. stearothermophilus	55	cluster39	gccggcttagctcaattggtagagcaactgacttgtaatcagtaggttgcgggttcaagtcctgcagccggcaccacca	ThrTGT	46	V-region	G	0	5.67182	3781	27.7742	m7G	NaBH4
G. stearothermophilus	70	cluster39	gccggcttagctcaattggtagagcaactgacttgtaatcagtaggttgcgggttcaagtcctgcagccggcaccacca	ThrTGT	46	V-region	G	0	5.58414	3499	29.6765	m7G	NaBH4
G. stearothermophilus	40	cluster4	ggggcattagctcagttgggagagcgtcgtgctggcagcgcgaaggtcaccggttcgagcccggtatgctccaccacca	AlaGGC	46	V-region	G	0	5.3447	733	36.6689	m7G	NaBH4
G. stearothermophilus	55	cluster4	ggggcattagctcagttgggagagcgtcgtgctggcagcgcgaaggtcaccggttcgagcccggtatgctccaccacca	AlaGGC	46	V-region	G	0	5.55676	1606.33	42.6522	m7G	NaBH4
G. stearothermophilus	70	cluster4	ggggcattagctcagttgggagagcgtcgtgctggcagcgcgaaggtcaccggttcgagcccggtatgctccaccacca	AlaGGC	46	V-region	G	0	5.55988	2243	46.6726	m7G	NaBH4
G. stearothermophilus	40	cluster44	gccgacttagctcaattggtagagcaactgaatcgtaatcagtaggttgcgggttcaagtcctgcagtcggcaccacca	ThrCGT-2	46	V-region	G	0	6.05956	2283.33	31.1864	m7G	NaBH4
G. stearothermophilus	55	cluster44	gccgacttagctcaattggtagagcaactgaatcgtaatcagtaggttgcgggttcaagtcctgcagtcggcaccacca	ThrCGT-2	46	V-region	G	0	6.26564	3902.33	24.6532	m7G	NaBH4
G. stearothermophilus	70	cluster44	gccgacttagctcaattggtagagcaactgaatcgtaatcagtaggttgcgggttcaagtcctgcagtcggcaccacca	ThrCGT-2	46	V-region	G	0	6.1396	4716.33	27.9985	m7G	NaBH4
G. stearothermophilus	40	cluster8	gccgacttagctcaattggtagagcaactgaatcgtaatcagtaggttgcgggttcgagtcctgcagtcggcaccacca	ThrCGT-1	46	V-region	G	0	5.63713	1012.33	25.8615	m7G	NaBH4
G. stearothermophilus	55	cluster8	gccgacttagctcaattggtagagcaactgaatcgtaatcagtaggttgcgggttcgagtcctgcagtcggcaccacca	ThrCGT-1	46	V-region	G	0	6.06467	1671.33	21.4353	m7G	NaBH4
G. stearothermophilus	70	cluster8	gccgacttagctcaattggtagagcaactgaatcgtaatcagtaggttgcgggttcgagtcctgcagtcggcaccacca	ThrCGT-1	46	V-region	G	0	5.84326	1759	23.282	m7G	NaBH4
G. stearothermophilus	40	cluster9	ggctcggtagctcagtcggtagagcaaaggactgaaaatccttgtgtcggcggttcgattccgtcccgagccaccacca	PheGAA	46	V-region	G	0	5.12076	6673	7.38274	m7G	NaBH4
G. stearothermophilus	55	cluster9	ggctcggtagctcagtcggtagagcaaaggactgaaaatccttgtgtcggcggttcgattccgtcccgagccaccacca	PheGAA	46	V-region	G	0	5.77906	6081	6.19348	m7G	NaBH4
G. stearothermophilus	70	cluster9	ggctcggtagctcagtcggtagagcaaaggactgaaaatccttgtgtcggcggttcgattccgtcccgagccaccacca	PheGAA	46	V-region	G	0	5.44189	5917	6.08245	m7G	NaBH4
G. stearothermophilus	40	cluster11	aggggcatagtttaatggtagaacagaggtctccaaaacctccggtgtgggttcgattcctactgcccctgccacca	TrpCCA	35	AC-loop	C	0.00345395	1.05612	86.6667	7.48091	FP type II	NaBH4
G. stearothermophilus	40	cluster11	aggggcatagtttaatggtagaacagaggtctccaaaacctccggtgtgggttcgattcctactgcccctgccacca	TrpCCA	25	3' D-stem	C	0.00217834	1.32031	30.3333	3.56801	FP type II	NaBH4
G. stearothermophilus	55	cluster11	aggggcatagtttaatggtagaacagaggtctccaaaacctccggtgtgggttcgattcctactgcccctgccacca	TrpCCA	21	D-loop	A	0	1.28325	20.3333	2.2524	FP type II	NaBH4
G. stearothermophilus	70	cluster11	aggggcatagtttaatggtagaacagaggtctccaaaacctccggtgtgggttcgattcctactgcccctgccacca	TrpCCA	35	AC-loop	C	0.0080571	1.0095	76.6667	4.75923	FP type II	NaBH4
G. stearothermophilus	70	cluster11	aggggcatagtttaatggtagaacagaggtctccaaaacctccggtgtgggttcgattcctactgcccctgccacca	TrpCCA	21	D-loop	A	0	1.36207	25	2.11447	FP type II	NaBH4
G. stearothermophilus	70	cluster11	aggggcatagtttaatggtagaacagaggtctccaaaacctccggtgtgggttcgattcctactgcccctgccacca	TrpCCA	25	3' D-stem	C	0.00991872	1.4961	36	2.76644	FP type II	NaBH4
G. stearothermophilus	40	cluster13	gggcctatagctcagctggtcagagcgcacgcctgataagcgtgaggtcggtggttcaagtccacttaggcccaccacca	IleGAT	48	V-region	C	3.97727315199754e-11	1.2996	368.667	2.87227	FP type II	NaBH4
G. stearothermophilus	40	cluster13	gggcctatagctcagctggtcagagcgcacgcctgataagcgtgaggtcggtggttcaagtccacttaggcccaccacca	IleGAT	56	T-loop	C	9.55679979597335e-15	1.66638	298	2.13056	FP type II	NaBH4
G. stearothermophilus	70	cluster13	gggcctatagctcagctggtcagagcgcacgcctgataagcgtgaggtcggtggttcaagtccacttaggcccaccacca	IleGAT	20a	D-loop	C	0	1.04371	2250.67	9.66765	FP type II	NaBH4
G. stearothermophilus	70	cluster15	ggggccttagctcagctgggagagcgcctgccccgcacgcaggaggtcatcggttcgaatccgataggctccaccacca	AlaCGC	59	T-loop	A	0	3.29085	91.6667	3.54258	FP type II	NaBH4
G. stearothermophilus	40	cluster16	tgggccatagccaagcggtaaggcaacggactttgactccgtgatgcgctggttcgaatccagctggcccagccacca	GlnTTG-1	7	5' ACC-stem	A	0	2.63934	273.333	2.98221	FP type II	NaBH4
G. stearothermophilus	55	cluster16	tgggccatagccaagcggtaaggcaacggactttgactccgtgatgcgctggttcgaatccagctggcccagccacca	GlnTTG-1	21	D-loop	A	0	1.67944	1187.67	6.49693	FP type II	NaBH4
G. stearothermophilus	70	cluster16	tgggccatagccaagcggtaaggcaacggactttgactccgtgatgcgctggttcgaatccagctggcccagccacca	GlnTTG-1	21	D-loop	A	0	3.13809	2017	9.16211	FP type II	NaBH4
G. stearothermophilus	70	cluster16	tgggccatagccaagcggtaaggcaacggactttgactccgtgatgcgctggttcgaatccagctggcccagccacca	GlnTTG-1	22	3' D-stem	A	0	1.43625	1107.67	4.89824	FP type II	NaBH4
G. stearothermophilus	70	cluster16	tgggccatagccaagcggtaaggcaacggactttgactccgtgatgcgctggttcgaatccagctggcccagccacca	GlnTTG-1	7	5' ACC-stem	A	0	3.02411	422	2.60424	FP type II	NaBH4
G. stearothermophilus	70	cluster17	gcttccatagctcagtaggtagagcacttccatggtaaggaagaggtcaccggttcgagcccggttggaagctccacca	ThrGGT	48	V-region	C	6.6992750705788e-05	1.63168	125	2.34246	FP type II	NaBH4
G. stearothermophilus	70	cluster18	tgggctatagccaagcggtaaggcaacggactttgactccgtgatgcgctggttcgaatccagctagcccagccacca	GlnTTG-2	21	D-loop	A	0	1.70662	538.333	20.0818	FP type II	NaBH4
G. stearothermophilus	70	cluster18	tgggctatagccaagcggtaaggcaacggactttgactccgtgatgcgctggttcgaatccagctagcccagccacca	GlnTTG-2	48	V-region	C	0.000839099	1.38546	89.3333	2.02738	FP type II	NaBH4
G. stearothermophilus	70	cluster19	gattccgtagctcagctgggagagcgccaccttgacagggtggaggtcgctggttcgagcccagtcggaatcaccacca	ValGAC	63	3' T-stem	A	0	3.35011	624.667	4.63495	FP type II	NaBH4
G. stearothermophilus	55	cluster20	gcgctcgtagctcaattggatagagcatctgactacggatcagaaggttaggggttcgaatcctctcgagcgcgccacca	ArgACG	13	5' D-stem	C	0.00159408	1.38131	36	2.3016	FP type II	NaBH4
G. stearothermophilus	55	cluster21	gcggaagtagttcagtggtagaacaccaccttgccaaggtgggggtcgcgggttcgagtcccgtcttccgctccacca	GlyGCC-2	13	5' D-stem	C	0.0072483	1.14948	66.3333	2.9852	FP type II	NaBH4
G. stearothermophilus	70	cluster21	gcggaagtagttcagtggtagaacaccaccttgccaaggtgggggtcgcgggttcgagtcccgtcttccgctccacca	GlyGCC-2	13	5' D-stem	C	0.000186431	1.28058	130.667	5.95842	FP type II	NaBH4
G. stearothermophilus	70	cluster25	ggccccgtagctcagtggatagagcgtcggtttcctaaaccgtgcgtcggaggttcgaatcctctcggggccgccacca	ArgCCT	48	V-region	C	0	1.04584	20.3333	3.69684	FP type II	NaBH4
G. stearothermophilus	70	cluster25	ggccccgtagctcagtggatagagcgtcggtttcctaaaccgtgcgtcggaggttcgaatcctctcggggccgccacca	ArgCCT	45	V-region	C	0	1.20626	21.3333	4.76704	FP type II	NaBH4
G. stearothermophilus	55	cluster26	ggcggcatagccaagtggtaaggcagaggtctgcaaaacctttacccccggttcgaatccgggtgccgcctccacca	CysGCA	21	D-loop	A	4.30292263524624e-15	2.78428	106.667	21.8649	FP type II	NaBH4
G. stearothermophilus	70	cluster26	ggcggcatagccaagtggtaaggcagaggtctgcaaaacctttacccccggttcgaatccgggtgccgcctccacca	CysGCA	21	D-loop	A	2.63323022832216e-14	2.95954	155	28.4123	FP type II	NaBH4
G. stearothermophilus	40	cluster27	gcggtcgtggcggaatggcagacgcgctaggttgagggcctagtgggggcaaccccgtggaggttcaagtcctctcgaccgcaccacca	LeuGAG	15	D-loop	A	4.56292828454961e-14	2.10901	190	10.9832	FP type II	NaBH4
G. stearothermophilus	55	cluster27	gcggtcgtggcggaatggcagacgcgctaggttgagggcctagtgggggcaaccccgtggaggttcaagtcctctcgaccgcaccacca	LeuGAG	15	D-loop	A	0.00020862	1.5423	72	8.08381	FP type II	NaBH4
G. stearothermophilus	55	cluster27	gcggtcgtggcggaatggcagacgcgctaggttgagggcctagtgggggcaaccccgtggaggttcaagtcctctcgaccgcaccacca	LeuGAG	20	D-loop	C	0.00910165	1.14681	58.6667	5.75977	FP type II	NaBH4
G. stearothermophilus	70	cluster27	gcggtcgtggcggaatggcagacgcgctaggttgagggcctagtgggggcaaccccgtggaggttcaagtcctctcgaccgcaccacca	LeuGAG	15	D-loop	A	6.6992750705788e-05	1.64092	108	12.8967	FP type II	NaBH4
G. stearothermophilus	70	cluster27	gcggtcgtggcggaatggcagacgcgctaggttgagggcctagtgggggcaaccccgtggaggttcaagtcctctcgaccgcaccacca	LeuGAG	56	T-loop	C	4.14632465420906e-06	1.84541	123.333	2.21002	FP type II	NaBH4
G. stearothermophilus	70	cluster27	gcggtcgtggcggaatggcagacgcgctaggttgagggcctagtgggggcaaccccgtggaggttcaagtcctctcgaccgcaccacca	LeuGAG	14	D-loop	A	0.00991872	1.55854	38.3333	5.87188	FP type II	NaBH4
G. stearothermophilus	55	cluster28	ggggccttagctcagctgggagagcgcctgctttgcacgcaggaggtcatcggttcgatcccgataggctccaccacca	AlaTGC	51	5' T-stem	C	0	1.80687	437	2.27057	FP type II	NaBH4
G. stearothermophilus	70	cluster28	ggggccttagctcagctgggagagcgcctgctttgcacgcaggaggtcatcggttcgatcccgataggctccaccacca	AlaTGC	51	5' T-stem	C	0	1.85136	465	2.80888	FP type II	NaBH4
G. stearothermophilus	70	cluster28	ggggccttagctcagctgggagagcgcctgctttgcacgcaggaggtcatcggttcgatcccgataggctccaccacca	AlaTGC	13	5' D-stem	C	0.00577577	1.19512	96.3333	2.39382	FP type II	NaBH4
G. stearothermophilus	55	cluster30	ggaggattagctcagctgggagagcacttgccttacaagcaaggggtcggcggttcgatcccgtcatcctccaccacca	ValTAC	13	5' D-stem	C	5.9556479124995e-05	1.45825	93.3333	2.09378	FP type II	NaBH4
G. stearothermophilus	55	cluster30	ggaggattagctcagctgggagagcacttgccttacaagcaaggggtcggcggttcgatcccgtcatcctccaccacca	ValTAC	48	V-region	C	0	2.90625	305.667	2.20227	FP type II	NaBH4
G. stearothermophilus	70	cluster30	ggaggattagctcagctgggagagcacttgccttacaagcaaggggtcggcggttcgatcccgtcatcctccaccacca	ValTAC	60	T-loop	C	0	2.56141	493.333	2.63201	FP type II	NaBH4
G. stearothermophilus	70	cluster30	ggaggattagctcagctgggagagcacttgccttacaagcaaggggtcggcggttcgatcccgtcatcctccaccacca	ValTAC	48	V-region	C	0	2.72607	474.667	2.71044	FP type II	NaBH4
G. stearothermophilus	55	cluster31	ggcccgttggtcaagtggttaagacaccgccctttcacggcggtaacacgggttcgaatcccgtacgggtcaccacca	GluTTC	21	D-loop	A	0	1.34298	3057.67	11.4089	FP type II	NaBH4
G. stearothermophilus	70	cluster31	ggcccgttggtcaagtggttaagacaccgccctttcacggcggtaacacgggttcgaatcccgtacgggtcaccacca	GluTTC	21	D-loop	A	0	3.0552	7391.67	20.096	FP type II	NaBH4
G. stearothermophilus	55	cluster33	gagccattagctcagtaggtagagcatctgacttttaatcagagggtcggaggttcgagtcctccatggctcaccacca	LysTTT	28	5' AC-stem	C	4.44093490890558e-06	1.53172	115.667	2.50641	FP type II	NaBH4
G. stearothermophilus	55	cluster33	gagccattagctcagtaggtagagcatctgacttttaatcagagggtcggaggttcgagtcctccatggctcaccacca	LysTTT	13	5' D-stem	C	1.06932623118299e-05	1.7627	84.3333	2.77162	FP type II	NaBH4
G. stearothermophilus	70	cluster33	gagccattagctcagtaggtagagcatctgacttttaatcagagggtcggaggttcgagtcctccatggctcaccacca	LysTTT	32	AC-loop	C	0.00089087	1.45131	77	4.33303	FP type II	NaBH4
G. stearothermophilus	70	cluster33	gagccattagctcagtaggtagagcatctgacttttaatcagagggtcggaggttcgagtcctccatggctcaccacca	LysTTT	13	5' D-stem	C	0.00991872	1.33853	36.6667	4.21962	FP type II	NaBH4
G. stearothermophilus	40	cluster34	gcgggtgtggcggaattggcagacgcgctagattcagggtctagtgccctttacgggcgtgggggttcgagtcccttcacccgcaccacca	LeuCAG	15	D-loop	A	0	1.65953	608	33.2012	FP type II	NaBH4
G. stearothermophilus	40	cluster34	gcgggtgtggcggaattggcagacgcgctagattcagggtctagtgccctttacgggcgtgggggttcgagtcccttcacccgcaccacca	LeuCAG	14	D-loop	A	0.000871016	1.33314	79.3333	6.43492	FP type II	NaBH4
G. stearothermophilus	55	cluster35	tggggtatagccaagcggtaaggcaacggactttgactccgtgatgcgttggttcgaatccagctaccccagccacca	GlnTTG-3	21	D-loop	A	4.7152088437142e-05	1.131	191.667	20.3195	FP type II	NaBH4
G. stearothermophilus	70	cluster35	tggggtatagccaagcggtaaggcaacggactttgactccgtgatgcgttggttcgaatccagctaccccagccacca	GlnTTG-3	21	D-loop	A	8.2276673783613e-05	1.30006	172.667	23.6362	FP type II	NaBH4
G. stearothermophilus	40	cluster36	cgcggggtggagcagtctggtagctcgtcgggctcataacccgaaggtcgcaggttcaaatcctgcccccgcaaccacca	MetCAT-1	56	T-loop	C	0	2.91066	705	2.61926	FP type II	NaBH4
G. stearothermophilus	55	cluster36	cgcggggtggagcagtctggtagctcgtcgggctcataacccgaaggtcgcaggttcaaatcctgcccccgcaaccacca	MetCAT-1	56	T-loop	C	0	3.46476	353.667	2.80827	FP type II	NaBH4
G. stearothermophilus	70	cluster36	cgcggggtggagcagtctggtagctcgtcgggctcataacccgaaggtcgcaggttcaaatcctgcccccgcaaccacca	MetCAT-1	56	T-loop	C	6.74519043526482e-15	1.6981	440.333	3.01365	FP type II	NaBH4
G. stearothermophilus	40	cluster37	ggcggtgtagctcagctggctagagcgtacggttcatacccgtgaggtcgggggttcgatcccctccaccgccaccacca	MetCAT-2	34	AC-loop	C	0	3.87381	1602.67	46.4853	FP type II	NaBH4
G. stearothermophilus	40	cluster37	ggcggtgtagctcagctggctagagcgtacggttcatacccgtgaggtcgggggttcgatcccctccaccgccaccacca	MetCAT-2	60	T-loop	C	0	3.49851	799.333	10.2607	FP type II	NaBH4
G. stearothermophilus	55	cluster37	ggcggtgtagctcagctggctagagcgtacggttcatacccgtgaggtcgggggttcgatcccctccaccgccaccacca	MetCAT-2	60	T-loop	C	0	4.50482	285	3.82481	FP type II	NaBH4
G. stearothermophilus	55	cluster37	ggcggtgtagctcagctggctagagcgtacggttcatacccgtgaggtcgggggttcgatcccctccaccgccaccacca	MetCAT-2	34	AC-loop	C	0	4.01163	1848	44.3298	FP type II	NaBH4
G. stearothermophilus	55	cluster37	ggcggtgtagctcagctggctagagcgtacggttcatacccgtgaggtcgggggttcgatcccctccaccgccaccacca	MetCAT-2	35	AC-loop	A	0.00882253	1.06404	88.3333	2.0668	FP type II	NaBH4
G. stearothermophilus	70	cluster37	ggcggtgtagctcagctggctagagcgtacggttcatacccgtgaggtcgggggttcgatcccctccaccgccaccacca	MetCAT-2	34	AC-loop	C	0	2.80911	2630.67	43.497	FP type II	NaBH4
G. stearothermophilus	70	cluster37	ggcggtgtagctcagctggctagagcgtacggttcatacccgtgaggtcgggggttcgatcccctccaccgccaccacca	MetCAT-2	60	T-loop	C	1.93947240904794e-15	1.71625	435.333	3.99672	FP type II	NaBH4
G. stearothermophilus	55	cluster39	gccggcttagctcaattggtagagcaactgacttgtaatcagtaggttgcgggttcaagtcctgcagccggcaccacca	ThrTGT	40	3' AC-stem	C	4.89687154651818e-12	1.20836	552.333	6.04626	FP type II	NaBH4
G. stearothermophilus	70	cluster39	gccggcttagctcaattggtagagcaactgacttgtaatcagtaggttgcgggttcaagtcctgcagccggcaccacca	ThrTGT	13	5' D-stem	C	0.0080571	1.03297	81	4.15785	FP type II	NaBH4
G. stearothermophilus	70	cluster39	gccggcttagctcaattggtagagcaactgacttgtaatcagtaggttgcgggttcaagtcctgcagccggcaccacca	ThrTGT	40	3' AC-stem	C	9.7314249991598e-11	1.25687	530.333	6.95011	FP type II	NaBH4
G. stearothermophilus	40	cluster4	ggggcattagctcagttgggagagcgtcgtgctggcagcgcgaaggtcaccggttcgagcccggtatgctccaccacca	AlaGGC	48	V-region	C	3.6119795638324e-05	1.67451	56	2.68267	FP type II	NaBH4
G. stearothermophilus	55	cluster4	ggggcattagctcagttgggagagcgtcgtgctggcagcgcgaaggtcaccggttcgagcccggtatgctccaccacca	AlaGGC	43	3' AC-stem	A	0.00159408	1.31012	36	2.16782	FP type II	NaBH4
G. stearothermophilus	55	cluster4	ggggcattagctcagttgggagagcgtcgtgctggcagcgcgaaggtcaccggttcgagcccggtatgctccaccacca	AlaGGC	48	V-region	C	2.18642202420051e-06	2.11132	95.3333	2.39931	FP type II	NaBH4
G. stearothermophilus	70	cluster4	ggggcattagctcagttgggagagcgtcgtgctggcagcgcgaaggtcaccggttcgagcccggtatgctccaccacca	AlaGGC	48	V-region	C	6.6992750705788e-05	1.5978	124.333	2.47859	FP type II	NaBH4
G. stearothermophilus	55	cluster41	cgggaagtagctcagcttggcagagcacatggtttgggaccatggggtcgcaggttcaaatcctgtcttcccgaccacca	ProTGG	20	D-loop	C	0	3.5308	213	16.0386	FP type II	NaBH4
G. stearothermophilus	70	cluster41	cgggaagtagctcagcttggcagagcacatggtttgggaccatggggtcgcaggttcaaatcctgtcttcccgaccacca	ProTGG	20	D-loop	C	0	2.34908	381.667	23.4683	FP type II	NaBH4
G. stearothermophilus	40	cluster43	ggaggagtacccaagtctggctgaaggggtcggtttcgaaaaccgataggggtgtcacagcccgcgggggttcgaatccctcctcctccgccacca	SerCGA-1	56	T-loop	C	0	4.04864	293	10.8955	FP type II	NaBH4
G. stearothermophilus	55	cluster43	ggaggagtacccaagtctggctgaaggggtcggtttcgaaaaccgataggggtgtcacagcccgcgggggttcgaatccctcctcctccgccacca	SerCGA-1	56	T-loop	C	0	3.82472	108.667	8.47888	FP type II	NaBH4
G. stearothermophilus	70	cluster43	ggaggagtacccaagtctggctgaaggggtcggtttcgaaaaccgataggggtgtcacagcccgcgggggttcgaatccctcctcctccgccacca	SerCGA-1	56	T-loop	C	0	2.29519	339.667	12.4187	FP type II	NaBH4
G. stearothermophilus	70	cluster44	gccgacttagctcaattggtagagcaactgaatcgtaatcagtaggttgcgggttcaagtcctgcagtcggcaccacca	ThrCGT-2	40	3' AC-stem	C	1.32365282966301e-10	1.00206	792	7.00347	FP type II	NaBH4
G. stearothermophilus	40	cluster5	ggaggaatacccaagtctggctgaagggggcggtttcgaaaaccgctaggggtgtcacagcccgcgggggttcgaatccctcttcctccgccacca	SerCGA-2	56	T-loop	C	5.29332515487706e-07	2.39872	50	6.47809	FP type II	NaBH4
G. stearothermophilus	70	cluster5	ggaggaatacccaagtctggctgaagggggcggtttcgaaaaccgctaggggtgtcacagcccgcgggggttcgaatccctcttcctccgccacca	SerCGA-2	56	T-loop	C	0.00991872	1.13776	36.3333	10.1953	FP type II	NaBH4
G. stearothermophilus	55	cluster6	gtcccagtagctcagtaggatagagcagcggccttctaagccgtcggtcgggagttcgagtctctcctgggacgccacca	ArgTCT	48	V-region	C	3.44593500477251e-08	2.44726	69.3333	6.13779	FP type II	NaBH4
G. stearothermophilus	70	cluster6	gtcccagtagctcagtaggatagagcagcggccttctaagccgtcggtcgggagttcgagtctctcctgggacgccacca	ArgTCT	48	V-region	C	2.73105707579235e-13	2.90562	142	6.76889	FP type II	NaBH4
G. stearothermophilus	70	cluster6	gtcccagtagctcagtaggatagagcagcggccttctaagccgtcggtcgggagttcgagtctctcctgggacgccacca	ArgTCT	58	T-loop	A	0	2.56977	64	2.55282	FP type II	NaBH4
G. stearothermophilus	40	cluster7	gccctcgtagtgtagtggatagcacgagagattccggttctcttagcgtgggttcgaatcctgccgagggcgccacca	ArgCCG	35	AC-loop	C	0.00387672	1.54003	54.6667	2.30285	FP type II	NaBH4
G. stearothermophilus	40	cluster7	gccctcgtagtgtagtggatagcacgagagattccggttctcttagcgtgggttcgaatcctgccgagggcgccacca	ArgCCG	34	AC-loop	C	0	4.0894	328.333	13.8313	FP type II	NaBH4
G. stearothermophilus	55	cluster8	gccgacttagctcaattggtagagcaactgaatcgtaatcagtaggttgcgggttcgagtcctgcagtcggcaccacca	ThrCGT-1	40	3' AC-stem	C	6.97309361007947e-07	1.10575	310	5.29218	FP type II	NaBH4
G. stearothermophilus	70	cluster8	gccgacttagctcaattggtagagcaactgaatcgtaatcagtaggttgcgggttcgagtcctgcagtcggcaccacca	ThrCGT-1	40	3' AC-stem	C	1.84933731176112e-06	1.03594	374.667	6.8488	FP type II	NaBH4
G. stearothermophilus	40	cluster13	gggcctatagctcagctggtcagagcgcacgcctgataagcgtgaggtcggtggttcaagtccacttaggcccaccacca	IleGAT	45	V-region	G	0	3.60653	1213.67	13.2365	FP type I	NaBH4
G. stearothermophilus	55	cluster13	gggcctatagctcagctggtcagagcgcacgcctgataagcgtgaggtcggtggttcaagtccacttaggcccaccacca	IleGAT	45	V-region	G	0	4.60907	2608	8.70288	FP type I	NaBH4
G. stearothermophilus	70	cluster13	gggcctatagctcagctggtcagagcgcacgcctgataagcgtgaggtcggtggttcaagtccacttaggcccaccacca	IleGAT	45	V-region	G	0	4.39634	2208.67	6.21563	FP type I	NaBH4
G. stearothermophilus	40	cluster15	ggggccttagctcagctgggagagcgcctgccccgcacgcaggaggtcatcggttcgaatccgataggctccaccacca	AlaCGC	45	V-region	G	1.16356906221587e-06	1.9462	94.3333	5.40649	FP type I	NaBH4
G. stearothermophilus	55	cluster15	ggggccttagctcagctgggagagcgcctgccccgcacgcaggaggtcatcggttcgaatccgataggctccaccacca	AlaCGC	45	V-region	G	3.10902683323552e-05	2.07767	51.6667	5.03037	FP type I	NaBH4
G. stearothermophilus	70	cluster15	ggggccttagctcagctgggagagcgcctgccccgcacgcaggaggtcatcggttcgaatccgataggctccaccacca	AlaCGC	45	V-region	G	2.91141695501955e-05	1.98176	78	5.16363	FP type I	NaBH4
G. stearothermophilus	40	cluster16	tgggccatagccaagcggtaaggcaacggactttgactccgtgatgcgctggttcgaatccagctggcccagccacca	GlnTTG-1	34	AC-loop	T	1.54917043676214e-06	1.01701	301.333	2.0879	FP type I	NaBH4
G. stearothermophilus	40	cluster16	tgggccatagccaagcggtaaggcaacggactttgactccgtgatgcgctggttcgaatccagctggcccagccacca	GlnTTG-1	43	3' AC-stem	T	1.13750740428696e-12	1.38178	386	2.52845	FP type I	NaBH4
G. stearothermophilus	70	cluster16	tgggccatagccaagcggtaaggcaacggactttgactccgtgatgcgctggttcgaatccagctggcccagccacca	GlnTTG-1	19	D-loop	G	9.59443455857612e-12	1.45288	448.333	2.37989	FP type I	NaBH4
G. stearothermophilus	70	cluster16	tgggccatagccaagcggtaaggcaacggactttgactccgtgatgcgctggttcgaatccagctggcccagccacca	GlnTTG-1	43	3' AC-stem	T	0	2.22414	641.667	2.47288	FP type I	NaBH4
G. stearothermophilus	40	cluster17	gcttccatagctcagtaggtagagcacttccatggtaaggaagaggtcaccggttcgagcccggttggaagctccacca	ThrGGT	45	V-region	G	3.31386082416815e-10	2.85051	69	15.9918	FP type I	NaBH4
G. stearothermophilus	55	cluster17	gcttccatagctcagtaggtagagcacttccatggtaaggaagaggtcaccggttcgagcccggttggaagctccacca	ThrGGT	45	V-region	G	0	4.43487	355	12.0203	FP type I	NaBH4
G. stearothermophilus	70	cluster17	gcttccatagctcagtaggtagagcacttccatggtaaggaagaggtcaccggttcgagcccggttggaagctccacca	ThrGGT	45	V-region	G	0	3.79411	365.667	9.63219	FP type I	NaBH4
G. stearothermophilus	70	cluster18	tgggctatagccaagcggtaaggcaacggactttgactccgtgatgcgctggttcgaatccagctagcccagccacca	GlnTTG-2	47	V-region	G	1.21488513184361e-05	1.73383	102.667	2.40906	FP type I	NaBH4
G. stearothermophilus	40	cluster19	gattccgtagctcagctgggagagcgccaccttgacagggtggaggtcgctggttcgagcccagtcggaatcaccacca	ValGAC	42	3' AC-stem	G	0	4.35258	632.333	6.75444	FP type I	NaBH4
G. stearothermophilus	40	cluster19	gattccgtagctcagctgggagagcgccaccttgacagggtggaggtcgctggttcgagcccagtcggaatcaccacca	ValGAC	43	3' AC-stem	G	0	2.90878	1429	13.1852	FP type I	NaBH4
G. stearothermophilus	40	cluster19	gattccgtagctcagctgggagagcgccaccttgacagggtggaggtcgctggttcgagcccagtcggaatcaccacca	ValGAC	45	V-region	G	0	4.93601	1222	10.0275	FP type I	NaBH4
G. stearothermophilus	40	cluster19	gattccgtagctcagctgggagagcgccaccttgacagggtggaggtcgctggttcgagcccagtcggaatcaccacca	ValGAC	39	3' AC-stem	G	0	3.6204	189.333	2.20519	FP type I	NaBH4
G. stearothermophilus	55	cluster19	gattccgtagctcagctgggagagcgccaccttgacagggtggaggtcgctggttcgagcccagtcggaatcaccacca	ValGAC	45	V-region	G	0	5.51933	1159.67	9.87459	FP type I	NaBH4
G. stearothermophilus	55	cluster19	gattccgtagctcagctgggagagcgccaccttgacagggtggaggtcgctggttcgagcccagtcggaatcaccacca	ValGAC	42	3' AC-stem	G	0	3.44472	413	4.36648	FP type I	NaBH4
G. stearothermophilus	55	cluster19	gattccgtagctcagctgggagagcgccaccttgacagggtggaggtcgctggttcgagcccagtcggaatcaccacca	ValGAC	43	3' AC-stem	G	0	1.90712	964.667	9.25744	FP type I	NaBH4
G. stearothermophilus	55	cluster19	gattccgtagctcagctgggagagcgccaccttgacagggtggaggtcgctggttcgagcccagtcggaatcaccacca	ValGAC	41	3' AC-stem	T	4.37081885039805e-16	2.56065	184.333	2.08254	FP type I	NaBH4
G. stearothermophilus	70	cluster19	gattccgtagctcagctgggagagcgccaccttgacagggtggaggtcgctggttcgagcccagtcggaatcaccacca	ValGAC	42	3' AC-stem	G	0	3.16709	294.333	4.20555	FP type I	NaBH4
G. stearothermophilus	70	cluster19	gattccgtagctcagctgggagagcgccaccttgacagggtggaggtcgctggttcgagcccagtcggaatcaccacca	ValGAC	43	3' AC-stem	G	0	2.08957	682.333	8.99421	FP type I	NaBH4
G. stearothermophilus	70	cluster19	gattccgtagctcagctgggagagcgccaccttgacagggtggaggtcgctggttcgagcccagtcggaatcaccacca	ValGAC	41	3' AC-stem	T	0	3.227	167.333	2.5196	FP type I	NaBH4
G. stearothermophilus	70	cluster19	gattccgtagctcagctgggagagcgccaccttgacagggtggaggtcgctggttcgagcccagtcggaatcaccacca	ValGAC	45	V-region	G	0	5.03564	944	10.9948	FP type I	NaBH4
G. stearothermophilus	70	cluster19	gattccgtagctcagctgggagagcgccaccttgacagggtggaggtcgctggttcgagcccagtcggaatcaccacca	ValGAC	39	3' AC-stem	G	2.55640047283456e-11	2.76596	131	2.07363	FP type I	NaBH4
G. stearothermophilus	55	cluster2	ggagaagtacccaagtggctgaaggggacggtttgctaaaccgttaggtcgcagttttgcggcgcgcgggttcaaatcccgccttctccgccacca	SerGCT-1	20b	D-loop	G	3.10902683323552e-05	2.04763	50.3333	16.9225	FP type I	NaBH4
G. stearothermophilus	70	cluster2	ggagaagtacccaagtggctgaaggggacggtttgctaaaccgttaggtcgcagttttgcggcgcgcgggttcaaatcccgccttctccgccacca	SerGCT-1	20b	D-loop	G	1.11632995033514e-07	2.37383	102.667	19.9674	FP type I	NaBH4
G. stearothermophilus	40	cluster20	gcgctcgtagctcaattggatagagcatctgactacggatcagaaggttaggggttcgaatcctctcgagcgcgccacca	ArgACG	45	V-region	G	0	4.7652	1175	7.61272	FP type I	NaBH4
G. stearothermophilus	40	cluster20	gcgctcgtagctcaattggatagagcatctgactacggatcagaaggttaggggttcgaatcctctcgagcgcgccacca	ArgACG	39	3' AC-stem	T	0.00189547	1.12995	80.6667	2.42593	FP type I	NaBH4
G. stearothermophilus	55	cluster20	gcgctcgtagctcaattggatagagcatctgactacggatcagaaggttaggggttcgaatcctctcgagcgcgccacca	ArgACG	45	V-region	G	0	5.15164	1220.33	6.01505	FP type I	NaBH4
G. stearothermophilus	70	cluster20	gcgctcgtagctcaattggatagagcatctgactacggatcagaaggttaggggttcgaatcctctcgagcgcgccacca	ArgACG	45	V-region	G	0	5.00977	1811	6.12883	FP type I	NaBH4
G. stearothermophilus	40	cluster22	ggtcccgtagtgtagtggttaacatgcctgcctgtcacgcaggagatcgcgggttcgagtcccgtcgggaccgccacca	AspGTC	15	D-loop	G	2.10797148364735e-07	1.02338	362	8.58962	FP type I	NaBH4
G. stearothermophilus	40	cluster23	tccgcaatagctcagcggtagagcaaccggctgttaaccggtaggtcgtaggttcgaatcctacttgcggagccacca	AsnGTT	42	3' AC-stem	G	0	1.50529	472.667	5.05028	FP type I	NaBH4
G. stearothermophilus	40	cluster23	tccgcaatagctcagcggtagagcaaccggctgttaaccggtaggtcgtaggttcgaatcctacttgcggagccacca	AsnGTT	45	V-region	G	0	2.70725	398	3.9104	FP type I	NaBH4
G. stearothermophilus	55	cluster23	tccgcaatagctcagcggtagagcaaccggctgttaaccggtaggtcgtaggttcgaatcctacttgcggagccacca	AsnGTT	45	V-region	G	0	2.89564	551	2.7217	FP type I	NaBH4
G. stearothermophilus	55	cluster23	tccgcaatagctcagcggtagagcaaccggctgttaaccggtaggtcgtaggttcgaatcctacttgcggagccacca	AsnGTT	42	3' AC-stem	G	0	1.39782	633.667	3.34326	FP type I	NaBH4
G. stearothermophilus	70	cluster23	tccgcaatagctcagcggtagagcaaccggctgttaaccggtaggtcgtaggttcgaatcctacttgcggagccacca	AsnGTT	43	3' AC-stem	T	7.70274928997366e-09	1.11088	511.667	2.23608	FP type I	NaBH4
G. stearothermophilus	70	cluster23	tccgcaatagctcagcggtagagcaaccggctgttaaccggtaggtcgtaggttcgaatcctacttgcggagccacca	AsnGTT	42	3' AC-stem	G	7.93203310824325e-09	1.05105	554	2.47704	FP type I	NaBH4
G. stearothermophilus	70	cluster23	tccgcaatagctcagcggtagagcaaccggctgttaaccggtaggtcgtaggttcgaatcctacttgcggagccacca	AsnGTT	45	V-region	G	0	3.401	666.333	2.7991	FP type I	NaBH4
G. stearothermophilus	40	cluster24	gcgggtgtagtttagtggtaaaacctcagccttccaagctgatgtcgtgggttcgattcccatcacccgctccacca	GlyTCC	10	5' D-stem	G	0.000329292	1.55501	36.3333	3.14235	FP type I	NaBH4
G. stearothermophilus	40	cluster24	gcgggtgtagtttagtggtaaaacctcagccttccaagctgatgtcgtgggttcgattcccatcacccgctccacca	GlyTCC	13	5' D-stem	T	4.9367107958124e-08	2.14456	56.6667	4.42957	FP type I	NaBH4
G. stearothermophilus	40	cluster24	gcgggtgtagtttagtggtaaaacctcagccttccaagctgatgtcgtgggttcgattcccatcacccgctccacca	GlyTCC	41	3' AC-stem	T	0.00331021	1.13139	60.3333	2.38207	FP type I	NaBH4
G. stearothermophilus	55	cluster26	ggcggcatagccaagtggtaaggcagaggtctgcaaaacctttacccccggttcgaatccgggtgccgcctccacca	CysGCA	19	D-loop	G	2.30383296227319e-10	2.99611	83.3333	25.1498	FP type I	NaBH4
G. stearothermophilus	70	cluster26	ggcggcatagccaagtggtaaggcagaggtctgcaaaacctttacccccggttcgaatccgggtgccgcctccacca	CysGCA	19	D-loop	G	8.02649439242391e-14	3.3302	118.333	37.0259	FP type I	NaBH4
G. stearothermophilus	40	cluster27	gcggtcgtggcggaatggcagacgcgctaggttgagggcctagtgggggcaaccccgtggaggttcaagtcctctcgaccgcaccacca	LeuGAG	13	5' D-stem	G	0.000329292	1.77449	37.3333	2.48002	FP type I	NaBH4
G. stearothermophilus	40	cluster27	gcggtcgtggcggaatggcagacgcgctaggttgagggcctagtgggggcaaccccgtggaggttcaagtcctctcgaccgcaccacca	LeuGAG	21	D-loop	G	0.00104439	1.33603	67	3.28642	FP type I	NaBH4
G. stearothermophilus	70	cluster27	gcggtcgtggcggaatggcagacgcgctaggttgagggcctagtgggggcaaccccgtggaggttcaagtcctctcgaccgcaccacca	LeuGAG	21	D-loop	G	0.000733377	1.45918	64.3333	5.89602	FP type I	NaBH4
G. stearothermophilus	70	cluster27	gcggtcgtggcggaatggcagacgcgctaggttgagggcctagtgggggcaaccccgtggaggttcaagtcctctcgaccgcaccacca	LeuGAG	59	T-loop	G	0	3.90915	140	2.19838	FP type I	NaBH4
G. stearothermophilus	40	cluster28	ggggccttagctcagctgggagagcgcctgctttgcacgcaggaggtcatcggttcgatcccgataggctccaccacca	AlaTGC	42	3' AC-stem	G	0	2.38462	218	2.38893	FP type I	NaBH4
G. stearothermophilus	40	cluster28	ggggccttagctcagctgggagagcgcctgctttgcacgcaggaggtcatcggttcgatcccgataggctccaccacca	AlaTGC	32	AC-loop	T	5.27311881279813e-11	1.82342	185.667	2.43844	FP type I	NaBH4
G. stearothermophilus	40	cluster28	ggggccttagctcagctgggagagcgcctgctttgcacgcaggaggtcatcggttcgatcccgataggctccaccacca	AlaTGC	43	3' AC-stem	G	0	1.90694	380.333	4.00463	FP type I	NaBH4
G. stearothermophilus	40	cluster28	ggggccttagctcagctgggagagcgcctgctttgcacgcaggaggtcatcggttcgatcccgataggctccaccacca	AlaTGC	45	V-region	G	0	4.33964	1248	11.4008	FP type I	NaBH4
G. stearothermophilus	55	cluster28	ggggccttagctcagctgggagagcgcctgctttgcacgcaggaggtcatcggttcgatcccgataggctccaccacca	AlaTGC	43	3' AC-stem	G	6.95871746828905e-09	1.61561	225.667	2.16503	FP type I	NaBH4
G. stearothermophilus	55	cluster28	ggggccttagctcagctgggagagcgcctgctttgcacgcaggaggtcatcggttcgatcccgataggctccaccacca	AlaTGC	45	V-region	G	0	5.30281	1104.67	9.37103	FP type I	NaBH4
G. stearothermophilus	70	cluster28	ggggccttagctcagctgggagagcgcctgctttgcacgcaggaggtcatcggttcgatcccgataggctccaccacca	AlaTGC	43	3' AC-stem	G	5.32778211208164e-09	1.96721	186.333	2.19418	FP type I	NaBH4
G. stearothermophilus	70	cluster28	ggggccttagctcagctgggagagcgcctgctttgcacgcaggaggtcatcggttcgatcccgataggctccaccacca	AlaTGC	45	V-region	G	0	4.59793	959.333	10.004	FP type I	NaBH4
G. stearothermophilus	40	cluster30	ggaggattagctcagctgggagagcacttgccttacaagcaaggggtcggcggttcgatcccgtcatcctccaccacca	ValTAC	45	V-region	G	0	2.67434	473	8.31205	FP type I	NaBH4
G. stearothermophilus	55	cluster30	ggaggattagctcagctgggagagcacttgccttacaagcaaggggtcggcggttcgatcccgtcatcctccaccacca	ValTAC	44	V-region	G	5.34022303109738e-06	1.28982	185.333	2.27867	FP type I	NaBH4
G. stearothermophilus	55	cluster30	ggaggattagctcagctgggagagcacttgccttacaagcaaggggtcggcggttcgatcccgtcatcctccaccacca	ValTAC	45	V-region	G	0	4.26461	518.667	5.95272	FP type I	NaBH4
G. stearothermophilus	70	cluster30	ggaggattagctcagctgggagagcacttgccttacaagcaaggggtcggcggttcgatcccgtcatcctccaccacca	ValTAC	45	V-region	G	0	4.0339	845	7.871	FP type I	NaBH4
G. stearothermophilus	70	cluster30	ggaggattagctcagctgggagagcacttgccttacaagcaaggggtcggcggttcgatcccgtcatcctccaccacca	ValTAC	44	V-region	G	1.21862579507563e-06	1.20198	289.333	2.93236	FP type I	NaBH4
G. stearothermophilus	40	cluster31	ggcccgttggtcaagtggttaagacaccgccctttcacggcggtaacacgggttcgaatcccgtacgggtcaccacca	GluTTC	35	AC-loop	T	2.58291886377658e-15	1.06333	754.667	4.58677	FP type I	NaBH4
G. stearothermophilus	70	cluster31	ggcccgttggtcaagtggttaagacaccgccctttcacggcggtaacacgggttcgaatcccgtacgggtcaccacca	GluTTC	9	after 5' ACC-stem	G	0.000839099	1.26903	91.3333	4.60804	FP type I	NaBH4
G. stearothermophilus	55	cluster32	cgggatgtagctcagcttggtagagcacacgcatggggtgcgtggggtcgcaggttcaaatcctgtcatcccgaccacca	ProGGG	45	V-region	G	0	2.04314	36.6667	4.77837	FP type I	NaBH4
G. stearothermophilus	70	cluster32	cgggatgtagctcagcttggtagagcacacgcatggggtgcgtggggtcgcaggttcaaatcctgtcatcccgaccacca	ProGGG	45	V-region	G	0	2.79404	56.6667	5.80962	FP type I	NaBH4
G. stearothermophilus	40	cluster33	gagccattagctcagtaggtagagcatctgacttttaatcagagggtcggaggttcgagtcctccatggctcaccacca	LysTTT	42	3' AC-stem	G	0	4.55277	1644.67	10.6896	FP type I	NaBH4
G. stearothermophilus	40	cluster33	gagccattagctcagtaggtagagcatctgacttttaatcagagggtcggaggttcgagtcctccatggctcaccacca	LysTTT	45	V-region	G	0	4.28966	1397	8.10128	FP type I	NaBH4
G. stearothermophilus	55	cluster33	gagccattagctcagtaggtagagcatctgacttttaatcagagggtcggaggttcgagtcctccatggctcaccacca	LysTTT	42	3' AC-stem	G	0	6.5664	7033	12.8943	FP type I	NaBH4
G. stearothermophilus	55	cluster33	gagccattagctcagtaggtagagcatctgacttttaatcagagggtcggaggttcgagtcctccatggctcaccacca	LysTTT	45	V-region	G	0	5.37281	2074	3.62136	FP type I	NaBH4
G. stearothermophilus	70	cluster33	gagccattagctcagtaggtagagcatctgacttttaatcagagggtcggaggttcgagtcctccatggctcaccacca	LysTTT	36	AC-loop	T	0	1.10827	1645	30.6373	FP type I	NaBH4
G. stearothermophilus	70	cluster33	gagccattagctcagtaggtagagcatctgacttttaatcagagggtcggaggttcgagtcctccatggctcaccacca	LysTTT	42	3' AC-stem	G	0	7.00328	7954	14.6543	FP type I	NaBH4
G. stearothermophilus	70	cluster33	gagccattagctcagtaggtagagcatctgacttttaatcagagggtcggaggttcgagtcctccatggctcaccacca	LysTTT	45	V-region	G	0	5.80811	1936	3.42007	FP type I	NaBH4
G. stearothermophilus	40	cluster34	gcgggtgtggcggaattggcagacgcgctagattcagggtctagtgccctttacgggcgtgggggttcgagtcccttcacccgcaccacca	LeuCAG	21	D-loop	G	0.00960877	1.14561	59.3333	2.64479	FP type I	NaBH4
G. stearothermophilus	70	cluster34	gcgggtgtggcggaattggcagacgcgctagattcagggtctagtgccctttacgggcgtgggggttcgagtcccttcacccgcaccacca	LeuCAG	9	after 5' ACC-stem	G	0	1.02474	20	8.25908	FP type I	NaBH4
G. stearothermophilus	40	cluster36	cgcggggtggagcagtctggtagctcgtcgggctcataacccgaaggtcgcaggttcaaatcctgcccccgcaaccacca	MetCAT-1	45	V-region	G	0	3.09434	544	4.03722	FP type I	NaBH4
G. stearothermophilus	55	cluster36	cgcggggtggagcagtctggtagctcgtcgggctcataacccgaaggtcgcaggttcaaatcctgcccccgcaaccacca	MetCAT-1	45	V-region	G	0	3.88175	195.667	2.74564	FP type I	NaBH4
G. stearothermophilus	70	cluster36	cgcggggtggagcagtctggtagctcgtcgggctcataacccgaaggtcgcaggttcaaatcctgcccccgcaaccacca	MetCAT-1	45	V-region	G	0	4.16611	317.333	4.06757	FP type I	NaBH4
G. stearothermophilus	70	cluster36	cgcggggtggagcagtctggtagctcgtcgggctcataacccgaaggtcgcaggttcaaatcctgcccccgcaaccacca	MetCAT-1	5	5' ACC-stem	G	0.000186431	1.41324	128	3.42976	FP type I	NaBH4
G. stearothermophilus	40	cluster37	ggcggtgtagctcagctggctagagcgtacggttcatacccgtgaggtcgggggttcgatcccctccaccgccaccacca	MetCAT-2	45	V-region	G	0	2.66647	254.667	6.22436	FP type I	NaBH4
G. stearothermophilus	40	cluster37	ggcggtgtagctcagctggctagagcgtacggttcatacccgtgaggtcgggggttcgatcccctccaccgccaccacca	MetCAT-2	53	5' T-stem	G	0.000789512	1.00603	145.667	2.1478	FP type I	NaBH4
G. stearothermophilus	55	cluster37	ggcggtgtagctcagctggctagagcgtacggttcatacccgtgaggtcgggggttcgatcccctccaccgccaccacca	MetCAT-2	45	V-region	G	0	3.15861	198.667	4.10337	FP type I	NaBH4
G. stearothermophilus	70	cluster37	ggcggtgtagctcagctggctagagcgtacggttcatacccgtgaggtcgggggttcgatcccctccaccgccaccacca	MetCAT-2	45	V-region	G	0	3.29028	300.333	4.21003	FP type I	NaBH4
G. stearothermophilus	40	cluster38	gcgggtgtagtttaatggtaaaacctcagcttcccaagctgaagtcgtgggttcgattcccatcacccgctccacca	GlyCCC	13	5' D-stem	T	0.000907614	1.43382	45.6667	4.46863	FP type I	NaBH4
G. stearothermophilus	55	cluster38	gcgggtgtagtttaatggtaaaacctcagcttcccaagctgaagtcgtgggttcgattcccatcacccgctccacca	GlyCCC	19	D-loop	G	4.37081885039805e-16	2.10234	256.333	15.8505	FP type I	NaBH4
G. stearothermophilus	70	cluster38	gcgggtgtagtttaatggtaaaacctcagcttcccaagctgaagtcgtgggttcgattcccatcacccgctccacca	GlyCCC	19	D-loop	G	0	2.48859	683.333	26.4376	FP type I	NaBH4
G. stearothermophilus	40	cluster39	gccggcttagctcaattggtagagcaactgacttgtaatcagtaggttgcgggttcaagtcctgcagccggcaccacca	ThrTGT	45	V-region	G	0	4.03091	444.333	5.86744	FP type I	NaBH4
G. stearothermophilus	55	cluster39	gccggcttagctcaattggtagagcaactgacttgtaatcagtaggttgcgggttcaagtcctgcagccggcaccacca	ThrTGT	45	V-region	G	0	4.4183	418.333	4.26991	FP type I	NaBH4
G. stearothermophilus	70	cluster39	gccggcttagctcaattggtagagcaactgacttgtaatcagtaggttgcgggttcaagtcctgcagccggcaccacca	ThrTGT	35	AC-loop	G	3.80960712178675e-07	1.0126	460.333	6.92332	FP type I	NaBH4
G. stearothermophilus	70	cluster39	gccggcttagctcaattggtagagcaactgacttgtaatcagtaggttgcgggttcaagtcctgcagccggcaccacca	ThrTGT	59	T-loop	G	0	4.33429	267.667	2.0997	FP type I	NaBH4
G. stearothermophilus	70	cluster39	gccggcttagctcaattggtagagcaactgacttgtaatcagtaggttgcgggttcaagtcctgcagccggcaccacca	ThrTGT	18	D-loop	G	4.86031484486749e-11	2.29974	149.667	3.11153	FP type I	NaBH4
G. stearothermophilus	70	cluster39	gccggcttagctcaattggtagagcaactgacttgtaatcagtaggttgcgggttcaagtcctgcagccggcaccacca	ThrTGT	45	V-region	G	0	3.74921	374.333	4.52296	FP type I	NaBH4
G. stearothermophilus	40	cluster4	ggggcattagctcagttgggagagcgtcgtgctggcagcgcgaaggtcaccggttcgagcccggtatgctccaccacca	AlaGGC	45	V-region	G	0	3.75873	205.333	16.3692	FP type I	NaBH4
G. stearothermophilus	40	cluster4	ggggcattagctcagttgggagagcgtcgtgctggcagcgcgaaggtcaccggttcgagcccggtatgctccaccacca	AlaGGC	42	3' AC-stem	G	0.00217834	1.46116	29	2.9076	FP type I	NaBH4
G. stearothermophilus	55	cluster4	ggggcattagctcagttgggagagcgtcgtgctggcagcgcgaaggtcaccggttcgagcccggtatgctccaccacca	AlaGGC	45	V-region	G	0	4.80793	428.333	19.9355	FP type I	NaBH4
G. stearothermophilus	55	cluster4	ggggcattagctcagttgggagagcgtcgtgctggcagcgcgaaggtcaccggttcgagcccggtatgctccaccacca	AlaGGC	42	3' AC-stem	G	0.00159408	1.30581	36.3333	2.21249	FP type I	NaBH4
G. stearothermophilus	70	cluster4	ggggcattagctcagttgggagagcgtcgtgctggcagcgcgaaggtcaccggttcgagcccggtatgctccaccacca	AlaGGC	45	V-region	G	0	4.43498	479	18.9393	FP type I	NaBH4
G. stearothermophilus	55	cluster40	ggagaagtacccaagtggctgaaggggacggtttgctaaaccgttaggtcgtgacttaacggcgcgcgggttcaaatcccgccttctccgccacca	SerGCT-2	20b	D-loop	G	3.44593500477251e-08	2.78746	66.6667	15.9782	FP type I	NaBH4
G. stearothermophilus	70	cluster40	ggagaagtacccaagtggctgaaggggacggtttgctaaaccgttaggtcgtgacttaacggcgcgcgggttcaaatcccgccttctccgccacca	SerGCT-2	20b	D-loop	G	0.00015328	1.84205	68.6667	19.2744	FP type I	NaBH4
G. stearothermophilus	40	cluster43	ggaggagtacccaagtctggctgaaggggtcggtttcgaaaaccgataggggtgtcacagcccgcgggggttcgaatccctcctcctccgccacca	SerCGA-1	57	T-loop	G	0	3.5788	161	5.64417	FP type I	NaBH4
G. stearothermophilus	55	cluster43	ggaggagtacccaagtctggctgaaggggtcggtttcgaaaaccgataggggtgtcacagcccgcgggggttcgaatccctcctcctccgccacca	SerCGA-1	17a	D-loop	T	0	1.77812	30.3333	36.9487	FP type I	NaBH4
G. stearothermophilus	55	cluster43	ggaggagtacccaagtctggctgaaggggtcggtttcgaaaaccgataggggtgtcacagcccgcgggggttcgaatccctcctcctccgccacca	SerCGA-1	57	T-loop	G	0	2.20128	36	2.73788	FP type I	NaBH4
G. stearothermophilus	70	cluster43	ggaggagtacccaagtctggctgaaggggtcggtttcgaaaaccgataggggtgtcacagcccgcgggggttcgaatccctcctcctccgccacca	SerCGA-1	17a	D-loop	T	0	2.26656	49.6667	34.5401	FP type I	NaBH4
G. stearothermophilus	70	cluster43	ggaggagtacccaagtctggctgaaggggtcggtttcgaaaaccgataggggtgtcacagcccgcgggggttcgaatccctcctcctccgccacca	SerCGA-1	57	T-loop	G	2.55640047283456e-11	2.77341	130.667	4.54308	FP type I	NaBH4
G. stearothermophilus	40	cluster44	gccgacttagctcaattggtagagcaactgaatcgtaatcagtaggttgcgggttcaagtcctgcagtcggcaccacca	ThrCGT-2	45	V-region	G	0	3.93337	259	5.19752	FP type I	NaBH4
G. stearothermophilus	55	cluster44	gccgacttagctcaattggtagagcaactgaatcgtaatcagtaggttgcgggttcaagtcctgcagtcggcaccacca	ThrCGT-2	45	V-region	G	0	4.28122	469.333	3.96142	FP type I	NaBH4
G. stearothermophilus	55	cluster44	gccgacttagctcaattggtagagcaactgaatcgtaatcagtaggttgcgggttcaagtcctgcagtcggcaccacca	ThrCGT-2	35	AC-loop	G	0	1.16977	967.333	9.66777	FP type I	NaBH4
G. stearothermophilus	70	cluster44	gccgacttagctcaattggtagagcaactgaatcgtaatcagtaggttgcgggttcaagtcctgcagtcggcaccacca	ThrCGT-2	45	V-region	G	0	4.31205	517.333	4.28311	FP type I	NaBH4
G. stearothermophilus	70	cluster44	gccgacttagctcaattggtagagcaactgaatcgtaatcagtaggttgcgggttcaagtcctgcagtcggcaccacca	ThrCGT-2	35	AC-loop	G	0	1.24629	977.333	9.97451	FP type I	NaBH4
G. stearothermophilus	70	cluster44	gccgacttagctcaattggtagagcaactgaatcgtaatcagtaggttgcgggttcaagtcctgcagtcggcaccacca	ThrCGT-2	18	D-loop	G	2.89690752006843e-15	2.50911	210.333	3.14642	FP type I	NaBH4
G. stearothermophilus	40	cluster5	ggaggaatacccaagtctggctgaagggggcggtttcgaaaaccgctaggggtgtcacagcccgcgggggttcgaatccctcttcctccgccacca	SerCGA-2	57	T-loop	G	0.000329292	2.0526	35.3333	4.45318	FP type I	NaBH4
G. stearothermophilus	70	cluster6	gtcccagtagctcagtaggatagagcagcggccttctaagccgtcggtcgggagttcgagtctctcctgggacgccacca	ArgTCT	57	T-loop	G	4.13311025724006e-06	2.48996	66.6667	2.71487	FP type I	NaBH4
G. stearothermophilus	70	cluster6	gtcccagtagctcagtaggatagagcagcggccttctaagccgtcggtcgggagttcgagtctctcctgggacgccacca	ArgTCT	59	T-loop	G	0	2.84944	66.6667	2.59359	FP type I	NaBH4
G. stearothermophilus	40	cluster8	gccgacttagctcaattggtagagcaactgaatcgtaatcagtaggttgcgggttcgagtcctgcagtcggcaccacca	ThrCGT-1	45	V-region	G	3.2112902540233e-15	2.91504	111	3.84614	FP type I	NaBH4
G. stearothermophilus	55	cluster8	gccgacttagctcaattggtagagcaactgaatcgtaatcagtaggttgcgggttcgagtcctgcagtcggcaccacca	ThrCGT-1	45	V-region	G	0	3.63618	173	2.84127	FP type I	NaBH4
G. stearothermophilus	55	cluster8	gccgacttagctcaattggtagagcaactgaatcgtaatcagtaggttgcgggttcgagtcctgcagtcggcaccacca	ThrCGT-1	35	AC-loop	G	4.82735825216247e-09	1.06185	489.333	9.48035	FP type I	NaBH4
G. stearothermophilus	70	cluster8	gccgacttagctcaattggtagagcaactgaatcgtaatcagtaggttgcgggttcgagtcctgcagtcggcaccacca	ThrCGT-1	18	D-loop	G	4.93323968922655e-06	2.05035	89.3333	2.76325	FP type I	NaBH4
G. stearothermophilus	70	cluster8	gccgacttagctcaattggtagagcaactgaatcgtaatcagtaggttgcgggttcgagtcctgcagtcggcaccacca	ThrCGT-1	45	V-region	G	0	3.24179	166.333	2.8727	FP type I	NaBH4
G. stearothermophilus	70	cluster8	gccgacttagctcaattggtagagcaactgaatcgtaatcagtaggttgcgggttcgagtcctgcagtcggcaccacca	ThrCGT-1	35	AC-loop	G	6.64308062319891e-09	1.19091	473	10.1151	FP type I	NaBH4
G. stearothermophilus	40	cluster9	ggctcggtagctcagtcggtagagcaaaggactgaaaatccttgtgtcggcggttcgattccgtcccgagccaccacca	PheGAA	45	V-region	T	0	3.27988	2175.33	2.58291	FP type I	NaBH4
G. stearothermophilus	40	cluster9	ggctcggtagctcagtcggtagagcaaaggactgaaaatccttgtgtcggcggttcgattccgtcccgagccaccacca	PheGAA	44	V-region	G	0	2.62784	2636.33	3.22465	FP type I	NaBH4
G. stearothermophilus	55	cluster9	ggctcggtagctcagtcggtagagcaaaggactgaaaatccttgtgtcggcggttcgattccgtcccgagccaccacca	PheGAA	44	V-region	G	0	2.35955	1983.67	2.19659	FP type I	NaBH4
G. stearothermophilus	55	cluster9	ggctcggtagctcagtcggtagagcaaaggactgaaaatccttgtgtcggcggttcgattccgtcccgagccaccacca	PheGAA	45	V-region	T	0	3.109	1951.67	2.12087	FP type I	NaBH4
G. stearothermophilus	70	cluster9	ggctcggtagctcagtcggtagagcaaaggactgaaaatccttgtgtcggcggttcgattccgtcccgagccaccacca	PheGAA	45	V-region	T	0	3.81909	2519.67	2.73119	FP type I	NaBH4
G. stearothermophilus	70	cluster9	ggctcggtagctcagtcggtagagcaaaggactgaaaatccttgtgtcggcggttcgattccgtcccgagccaccacca	PheGAA	44	V-region	G	0	2.91158	2505.67	2.79049	FP type I	NaBH4
G. stearothermophilus	40	cluster11	aggggcatagtttaatggtagaacagaggtctccaaaacctccggtgtgggttcgattcctactgcccctgccacca	TrpCCA	20	D-loop	T	0.00387672	1.55389	41	5.2627	D	NaBH4
G. stearothermophilus	55	cluster11	aggggcatagtttaatggtagaacagaggtctccaaaacctccggtgtgggttcgattcctactgcccctgccacca	TrpCCA	20	D-loop	T	0	3.91528	180.333	20.5018	D	NaBH4
G. stearothermophilus	70	cluster11	aggggcatagtttaatggtagaacagaggtctccaaaacctccggtgtgggttcgattcctactgcccctgccacca	TrpCCA	20	D-loop	T	0	4.17318	296	25.2226	D	NaBH4
G. stearothermophilus	55	cluster12	gccgatgtggcggaattggcagacgcgcacgactcaaaatcgtgtggggtagccccccgtgtgggttcgactcccaccatcggcaccacca	LeuCAA	17	D-loop	T	0	2.54925	49.3333	34.533	D	NaBH4
G. stearothermophilus	70	cluster12	gccgatgtggcggaattggcagacgcgcacgactcaaaatcgtgtggggtagccccccgtgtgggttcgactcccaccatcggcaccacca	LeuCAA	17	D-loop	T	0	3.43665	84	54.7503	D	NaBH4
G. stearothermophilus	55	cluster13	gggcctatagctcagctggtcagagcgcacgcctgataagcgtgaggtcggtggttcaagtccacttaggcccaccacca	IleGAT	17	D-loop	T	0	1.72138	2672	25.9376	D	NaBH4
G. stearothermophilus	55	cluster13	gggcctatagctcagctggtcagagcgcacgcctgataagcgtgaggtcggtggttcaagtccacttaggcccaccacca	IleGAT	20	D-loop	T	0	2.38207	4488.33	26.1106	D	NaBH4
G. stearothermophilus	70	cluster13	gggcctatagctcagctggtcagagcgcacgcctgataagcgtgaggtcggtggttcaagtccacttaggcccaccacca	IleGAT	20	D-loop	T	0	2.77064	7024	33.4927	D	NaBH4
G. stearothermophilus	70	cluster13	gggcctatagctcagctggtcagagcgcacgcctgataagcgtgaggtcggtggttcaagtccacttaggcccaccacca	IleGAT	17	D-loop	T	0	3.47447	7436.67	61.0387	D	NaBH4
G. stearothermophilus	55	cluster15	ggggccttagctcagctgggagagcgcctgccccgcacgcaggaggtcatcggttcgaatccgataggctccaccacca	AlaCGC	17	D-loop	T	0	1.95342	35	4.22553	D	NaBH4
G. stearothermophilus	70	cluster15	ggggccttagctcagctgggagagcgcctgccccgcacgcaggaggtcatcggttcgaatccgataggctccaccacca	AlaCGC	17	D-loop	T	1.25931328856918e-12	2.68041	109.333	10.0588	D	NaBH4
G. stearothermophilus	55	cluster16	tgggccatagccaagcggtaaggcaacggactttgactccgtgatgcgctggttcgaatccagctggcccagccacca	GlnTTG-1	20	D-loop	T	0	2.04169	649	3.81695	D	NaBH4
G. stearothermophilus	70	cluster16	tgggccatagccaagcggtaaggcaacggactttgactccgtgatgcgctggttcgaatccagctggcccagccacca	GlnTTG-1	20	D-loop	T	0	3.43722	1106.33	5.53502	D	NaBH4
G. stearothermophilus	55	cluster17	gcttccatagctcagtaggtagagcacttccatggtaaggaagaggtcaccggttcgagcccggttggaagctccacca	ThrGGT	20	D-loop	T	0	2.92137	183.333	9.90121	D	NaBH4
G. stearothermophilus	70	cluster17	gcttccatagctcagtaggtagagcacttccatggtaaggaagaggtcaccggttcgagcccggttggaagctccacca	ThrGGT	47	V-region	T	1.11632995033514e-07	2.35072	104.667	2.00888	D	NaBH4
G. stearothermophilus	70	cluster17	gcttccatagctcagtaggtagagcacttccatggtaaggaagaggtcaccggttcgagcccggttggaagctccacca	ThrGGT	20	D-loop	T	9.05313471966096e-07	1.31069	265.333	12.2351	D	NaBH4
G. stearothermophilus	55	cluster18	tgggctatagccaagcggtaaggcaacggactttgactccgtgatgcgctggttcgaatccagctagcccagccacca	GlnTTG-2	20	D-loop	T	9.72507140898097e-05	1.15896	169.667	14.1276	D	NaBH4
G. stearothermophilus	70	cluster18	tgggctatagccaagcggtaaggcaacggactttgactccgtgatgcgctggttcgaatccagctagcccagccacca	GlnTTG-2	20	D-loop	T	8.8970266339435e-14	1.75631	365.667	17.0844	D	NaBH4
G. stearothermophilus	55	cluster19	gattccgtagctcagctgggagagcgccaccttgacagggtggaggtcgctggttcgagcccagtcggaatcaccacca	ValGAC	17	D-loop	T	0	1.97615	358.667	5.07079	D	NaBH4
G. stearothermophilus	70	cluster19	gattccgtagctcagctgggagagcgccaccttgacagggtggaggtcgctggttcgagcccagtcggaatcaccacca	ValGAC	17	D-loop	T	0	2.26232	365.333	7.33339	D	NaBH4
G. stearothermophilus	55	cluster2	ggagaagtacccaagtggctgaaggggacggtttgctaaaccgttaggtcgcagttttgcggcgcgcgggttcaaatcccgccttctccgccacca	SerGCT-1	20a	D-loop	T	0	3.0306	142.667	58.8364	D	NaBH4
G. stearothermophilus	70	cluster2	ggagaagtacccaagtggctgaaggggacggtttgctaaaccgttaggtcgcagttttgcggcgcgcgggttcaaatcccgccttctccgccacca	SerGCT-1	20a	D-loop	T	0	3.49448	219	51.0629	D	NaBH4
G. stearothermophilus	55	cluster20	gcgctcgtagctcaattggatagagcatctgactacggatcagaaggttaggggttcgaatcctctcgagcgcgccacca	ArgACG	20a	D-loop	T	0	3.22936	525.333	18.8659	D	NaBH4
G. stearothermophilus	70	cluster20	gcgctcgtagctcaattggatagagcatctgactacggatcagaaggttaggggttcgaatcctctcgagcgcgccacca	ArgACG	17	D-loop	T	9.26499686687374e-07	1.90518	130	4.60213	D	NaBH4
G. stearothermophilus	70	cluster20	gcgctcgtagctcaattggatagagcatctgactacggatcagaaggttaggggttcgaatcctctcgagcgcgccacca	ArgACG	20a	D-loop	T	0	3.95488	1372.33	30.5975	D	NaBH4
G. stearothermophilus	40	cluster22	ggtcccgtagtgtagtggttaacatgcctgcctgtcacgcaggagatcgcgggttcgagtcccgtcgggaccgccacca	AspGTC	20	D-loop	T	3.08317159772394e-09	1.61445	176.333	3.93671	D	NaBH4
G. stearothermophilus	40	cluster22	ggtcccgtagtgtagtggttaacatgcctgcctgtcacgcaggagatcgcgggttcgagtcccgtcgggaccgccacca	AspGTC	20a	D-loop	T	1.43879147198616e-10	1.55889	251	5.25409	D	NaBH4
G. stearothermophilus	55	cluster22	ggtcccgtagtgtagtggttaacatgcctgcctgtcacgcaggagatcgcgggttcgagtcccgtcgggaccgccacca	AspGTC	20	D-loop	T	0	5.30092	5048.67	62.9438	D	NaBH4
G. stearothermophilus	55	cluster22	ggtcccgtagtgtagtggttaacatgcctgcctgtcacgcaggagatcgcgggttcgagtcccgtcgggaccgccacca	AspGTC	20a	D-loop	T	0	4.19603	3691.67	31.1126	D	NaBH4
G. stearothermophilus	70	cluster22	ggtcccgtagtgtagtggttaacatgcctgcctgtcacgcaggagatcgcgggttcgagtcccgtcgggaccgccacca	AspGTC	20	D-loop	T	0	4.6932	8027.67	89.5271	D	NaBH4
G. stearothermophilus	70	cluster22	ggtcccgtagtgtagtggttaacatgcctgcctgtcacgcaggagatcgcgggttcgagtcccgtcgggaccgccacca	AspGTC	20a	D-loop	T	0	3.99407	5505.67	38.0814	D	NaBH4
G. stearothermophilus	40	cluster23	tccgcaatagctcagcggtagagcaaccggctgttaaccggtaggtcgtaggttcgaatcctacttgcggagccacca	AsnGTT	47	V-region	T	0	1.50941	439.667	2.02551	D	NaBH4
G. stearothermophilus	55	cluster23	tccgcaatagctcagcggtagagcaaccggctgttaaccggtaggtcgtaggttcgaatcctacttgcggagccacca	AsnGTT	47	V-region	T	0	2.66203	861	2.26145	D	NaBH4
G. stearothermophilus	40	cluster24	gcgggtgtagtttagtggtaaaacctcagccttccaagctgatgtcgtgggttcgattcccatcacccgctccacca	GlyTCC	20	D-loop	T	1.40032650445579e-11	2.08911	154	9.99643	D	NaBH4
G. stearothermophilus	55	cluster24	gcgggtgtagtttagtggtaaaacctcagccttccaagctgatgtcgtgggttcgattcccatcacccgctccacca	GlyTCC	20	D-loop	T	0	4.46289	1305.33	45.2224	D	NaBH4
G. stearothermophilus	70	cluster24	gcgggtgtagtttagtggtaaaacctcagccttccaagctgatgtcgtgggttcgattcccatcacccgctccacca	GlyTCC	20	D-loop	T	0	4.43525	3853.67	77.065	D	NaBH4
G. stearothermophilus	70	cluster25	ggccccgtagctcagtggatagagcgtcggtttcctaaaccgtgcgtcggaggttcgaatcctctcggggccgccacca	ArgCCT	20a	D-loop	T	0.000263426	2.10154	49.6667	19.4723	D	NaBH4
G. stearothermophilus	55	cluster26	ggcggcatagccaagtggtaaggcagaggtctgcaaaacctttacccccggttcgaatccgggtgccgcctccacca	CysGCA	20	D-loop	T	0.000239064	1.5179	44.6667	11.8955	D	NaBH4
G. stearothermophilus	70	cluster26	ggcggcatagccaagtggtaaggcagaggtctgcaaaacctttacccccggttcgaatccgggtgccgcctccacca	CysGCA	20	D-loop	T	4.20554512051319e-07	2.48663	71.6667	18.5983	D	NaBH4
G. stearothermophilus	55	cluster28	ggggccttagctcagctgggagagcgcctgctttgcacgcaggaggtcatcggttcgatcccgataggctccaccacca	AlaTGC	17	D-loop	T	0	1.7093	418.667	5.27511	D	NaBH4
G. stearothermophilus	70	cluster28	ggggccttagctcagctgggagagcgcctgctttgcacgcaggaggtcatcggttcgatcccgataggctccaccacca	AlaTGC	17	D-loop	T	0	2.58055	476.333	8.12831	D	NaBH4
G. stearothermophilus	70	cluster28	ggggccttagctcagctgggagagcgcctgctttgcacgcaggaggtcatcggttcgatcccgataggctccaccacca	AlaTGC	47	V-region	T	0	2.39074	331.667	2.07672	D	NaBH4
G. stearothermophilus	55	cluster3	cgggaagtagctcagcttggtagagcacacggttcgggtccgtgaggtcgcaggttcaaatcctgtcttcccgaccacca	ProCGG	20	D-loop	T	0	3.66915	691.667	19.7512	D	NaBH4
G. stearothermophilus	70	cluster3	cgggaagtagctcagcttggtagagcacacggttcgggtccgtgaggtcgcaggttcaaatcctgtcttcccgaccacca	ProCGG	20	D-loop	T	0	2.14062	1291.33	25.6067	D	NaBH4
G. stearothermophilus	55	cluster30	ggaggattagctcagctgggagagcacttgccttacaagcaaggggtcggcggttcgatcccgtcatcctccaccacca	ValTAC	17	D-loop	T	0	1.95277	338.333	6.32183	D	NaBH4
G. stearothermophilus	70	cluster30	ggaggattagctcagctgggagagcacttgccttacaagcaaggggtcggcggttcgatcccgtcatcctccaccacca	ValTAC	47	V-region	T	0	2.49923	384	2.25159	D	NaBH4
G. stearothermophilus	70	cluster30	ggaggattagctcagctgggagagcacttgccttacaagcaaggggtcggcggttcgatcccgtcatcctccaccacca	ValTAC	17	D-loop	T	0	2.70235	509.333	9.11142	D	NaBH4
G. stearothermophilus	40	cluster31	ggcccgttggtcaagtggttaagacaccgccctttcacggcggtaacacgggttcgaatcccgtacgggtcaccacca	GluTTC	20	D-loop	T	0	2.94641	613	7.09099	D	NaBH4
G. stearothermophilus	40	cluster31	ggcccgttggtcaagtggttaagacaccgccctttcacggcggtaacacgggttcgaatcccgtacgggtcaccacca	GluTTC	20a	D-loop	T	0	2.11882	479.333	5.24907	D	NaBH4
G. stearothermophilus	55	cluster31	ggcccgttggtcaagtggttaagacaccgccctttcacggcggtaacacgggttcgaatcccgtacgggtcaccacca	GluTTC	20	D-loop	T	0	3.07615	7230.33	41.1706	D	NaBH4
G. stearothermophilus	55	cluster31	ggcccgttggtcaagtggttaagacaccgccctttcacggcggtaacacgggttcgaatcccgtacgggtcaccacca	GluTTC	20a	D-loop	T	0	1.66895	5654.33	24.0043	D	NaBH4
G. stearothermophilus	70	cluster31	ggcccgttggtcaagtggttaagacaccgccctttcacggcggtaacacgggttcgaatcccgtacgggtcaccacca	GluTTC	20	D-loop	T	0	2.83302	12571	76.6602	D	NaBH4
G. stearothermophilus	70	cluster31	ggcccgttggtcaagtggttaagacaccgccctttcacggcggtaacacgggttcgaatcccgtacgggtcaccacca	GluTTC	20a	D-loop	T	0	1.8201	13064	44.1689	D	NaBH4
G. stearothermophilus	55	cluster32	cgggatgtagctcagcttggtagagcacacgcatggggtgcgtggggtcgcaggttcaaatcctgtcatcccgaccacca	ProGGG	20	D-loop	T	4.33721633509249e-06	2.19317	76.6667	18.0781	D	NaBH4
G. stearothermophilus	70	cluster32	cgggatgtagctcagcttggtagagcacacgcatggggtgcgtggggtcgcaggttcaaatcctgtcatcccgaccacca	ProGGG	20	D-loop	T	0.000409669	1.19482	139.667	24.2868	D	NaBH4
G. stearothermophilus	40	cluster33	gagccattagctcagtaggtagagcatctgacttttaatcagagggtcggaggttcgagtcctccatggctcaccacca	LysTTT	20	D-loop	T	0.000470861	1.13563	125.333	2.94788	D	NaBH4
G. stearothermophilus	55	cluster33	gagccattagctcagtaggtagagcatctgacttttaatcagagggtcggaggttcgagtcctccatggctcaccacca	LysTTT	20	D-loop	T	0	2.8923	515	12.4019	D	NaBH4
G. stearothermophilus	70	cluster33	gagccattagctcagtaggtagagcatctgacttttaatcagagggtcggaggttcgagtcctccatggctcaccacca	LysTTT	20	D-loop	T	0	2.16176	384.333	25.116	D	NaBH4
G. stearothermophilus	40	cluster34	gcgggtgtggcggaattggcagacgcgctagattcagggtctagtgccctttacgggcgtgggggttcgagtcccttcacccgcaccacca	LeuCAG	17	D-loop	T	2.38754431971349e-05	1.69482	97.3333	4.83546	D	NaBH4
G. stearothermophilus	55	cluster34	gcgggtgtggcggaattggcagacgcgctagattcagggtctagtgccctttacgggcgtgggggttcgagtcccttcacccgcaccacca	LeuCAG	17	D-loop	T	0	4.11354	353.667	42.4967	D	NaBH4
G. stearothermophilus	70	cluster34	gcgggtgtggcggaattggcagacgcgctagattcagggtctagtgccctttacgggcgtgggggttcgagtcccttcacccgcaccacca	LeuCAG	17	D-loop	T	0	4.62049	505	46.4785	D	NaBH4
G. stearothermophilus	55	cluster35	tggggtatagccaagcggtaaggcaacggactttgactccgtgatgcgttggttcgaatccagctaccccagccacca	GlnTTG-3	20	D-loop	T	0.000646995	1.24326	94	12.5226	D	NaBH4
G. stearothermophilus	70	cluster35	tggggtatagccaagcggtaaggcaacggactttgactccgtgatgcgttggttcgaatccagctaccccagccacca	GlnTTG-3	20	D-loop	T	0.00205697	1.2717	98.3333	17.6666	D	NaBH4
G. stearothermophilus	40	cluster36	cgcggggtggagcagtctggtagctcgtcgggctcataacccgaaggtcgcaggttcaaatcctgcccccgcaaccacca	MetCAT-1	47	V-region	T	0	2.3576	608.333	2.45336	D	NaBH4
G. stearothermophilus	55	cluster36	cgcggggtggagcagtctggtagctcgtcgggctcataacccgaaggtcgcaggttcaaatcctgcccccgcaaccacca	MetCAT-1	20	D-loop	T	0	3.19071	701.333	12.4741	D	NaBH4
G. stearothermophilus	55	cluster36	cgcggggtggagcagtctggtagctcgtcgggctcataacccgaaggtcgcaggttcaaatcctgcccccgcaaccacca	MetCAT-1	47	V-region	T	0	3.06838	275.333	2.35292	D	NaBH4
G. stearothermophilus	70	cluster36	cgcggggtggagcagtctggtagctcgtcgggctcataacccgaaggtcgcaggttcaaatcctgcccccgcaaccacca	MetCAT-1	20	D-loop	T	0	1.59412	1444.67	25.9819	D	NaBH4
G. stearothermophilus	70	cluster36	cgcggggtggagcagtctggtagctcgtcgggctcataacccgaaggtcgcaggttcaaatcctgcccccgcaaccacca	MetCAT-1	47	V-region	T	0	3.24972	383.667	2.77412	D	NaBH4
G. stearothermophilus	55	cluster37	ggcggtgtagctcagctggctagagcgtacggttcatacccgtgaggtcgggggttcgatcccctccaccgccaccacca	MetCAT-2	17	D-loop	T	2.66949630210168e-05	1.38073	158.333	10.0647	D	NaBH4
G. stearothermophilus	55	cluster37	ggcggtgtagctcagctggctagagcgtacggttcatacccgtgaggtcgggggttcgatcccctccaccgccaccacca	MetCAT-2	20a	D-loop	T	0	2.49261	291.333	14.7754	D	NaBH4
G. stearothermophilus	70	cluster37	ggcggtgtagctcagctggctagagcgtacggttcatacccgtgaggtcgggggttcgatcccctccaccgccaccacca	MetCAT-2	17	D-loop	T	0	2.99015	1023.33	48.0172	D	NaBH4
G. stearothermophilus	70	cluster37	ggcggtgtagctcagctggctagagcgtacggttcatacccgtgaggtcgggggttcgatcccctccaccgccaccacca	MetCAT-2	20a	D-loop	T	4.40254729224323e-12	1.2913	565	20.2684	D	NaBH4
G. stearothermophilus	40	cluster38	gcgggtgtagtttaatggtaaaacctcagcttcccaagctgaagtcgtgggttcgattcccatcacccgctccacca	GlyCCC	20	D-loop	T	1.59420521205654e-06	1.62746	103.667	8.26448	D	NaBH4
G. stearothermophilus	55	cluster38	gcgggtgtagtttaatggtaaaacctcagcttcccaagctgaagtcgtgggttcgattcccatcacccgctccacca	GlyCCC	20	D-loop	T	0	3.72287	739.333	30.1473	D	NaBH4
G. stearothermophilus	70	cluster38	gcgggtgtagtttaatggtaaaacctcagcttcccaagctgaagtcgtgggttcgattcccatcacccgctccacca	GlyCCC	20	D-loop	T	0	4.01532	2165.33	45.5252	D	NaBH4
G. stearothermophilus	55	cluster39	gccggcttagctcaattggtagagcaactgacttgtaatcagtaggttgcgggttcaagtcctgcagccggcaccacca	ThrTGT	17	D-loop	T	0	4.57316	1646.67	26.3214	D	NaBH4
G. stearothermophilus	55	cluster39	gccggcttagctcaattggtagagcaactgacttgtaatcagtaggttgcgggttcaagtcctgcagccggcaccacca	ThrTGT	20	D-loop	T	0	2.54979	396.333	5.7395	D	NaBH4
G. stearothermophilus	55	cluster39	gccggcttagctcaattggtagagcaactgacttgtaatcagtaggttgcgggttcaagtcctgcagccggcaccacca	ThrTGT	16	D-loop	T	3.42017287931214e-09	1.44793	278.333	6.39733	D	NaBH4
G. stearothermophilus	70	cluster39	gccggcttagctcaattggtagagcaactgacttgtaatcagtaggttgcgggttcaagtcctgcagccggcaccacca	ThrTGT	20	D-loop	T	0	2.50273	614.333	10.9529	D	NaBH4
G. stearothermophilus	70	cluster39	gccggcttagctcaattggtagagcaactgacttgtaatcagtaggttgcgggttcaagtcctgcagccggcaccacca	ThrTGT	16	D-loop	T	0	2.1736	359	12.8423	D	NaBH4
G. stearothermophilus	70	cluster39	gccggcttagctcaattggtagagcaactgacttgtaatcagtaggttgcgggttcaagtcctgcagccggcaccacca	ThrTGT	17	D-loop	T	0	5.71297	1985	40.9008	D	NaBH4
G. stearothermophilus	55	cluster4	ggggcattagctcagttgggagagcgtcgtgctggcagcgcgaaggtcaccggttcgagcccggtatgctccaccacca	AlaGGC	17	D-loop	T	5.87677915503581e-12	2.34036	157.333	11.8063	D	NaBH4
G. stearothermophilus	70	cluster4	ggggcattagctcagttgggagagcgtcgtgctggcagcgcgaaggtcaccggttcgagcccggtatgctccaccacca	AlaGGC	47	V-region	T	1.21488513184361e-05	1.7126	104	2.13298	D	NaBH4
G. stearothermophilus	70	cluster4	ggggcattagctcagttgggagagcgtcgtgctggcagcgcgaaggtcaccggttcgagcccggtatgctccaccacca	AlaGGC	17	D-loop	T	0	2.91092	193.667	13.2945	D	NaBH4
G. stearothermophilus	55	cluster40	ggagaagtacccaagtggctgaaggggacggtttgctaaaccgttaggtcgtgacttaacggcgcgcgggttcaaatcccgccttctccgccacca	SerGCT-2	20a	D-loop	T	0	3.16962	211	61.1337	D	NaBH4
G. stearothermophilus	70	cluster40	ggagaagtacccaagtggctgaaggggacggtttgctaaaccgttaggtcgtgacttaacggcgcgcgggttcaaatcccgccttctccgccacca	SerGCT-2	20a	D-loop	T	0	3.35846	164.333	54.8558	D	NaBH4
G. stearothermophilus	55	cluster43	ggaggagtacccaagtctggctgaaggggtcggtttcgaaaaccgataggggtgtcacagcccgcgggggttcgaatccctcctcctccgccacca	SerCGA-1	20a	D-loop	T	0	2.97603	70	40.6327	D	NaBH4
G. stearothermophilus	70	cluster43	ggaggagtacccaagtctggctgaaggggtcggtttcgaaaaccgataggggtgtcacagcccgcgggggttcgaatccctcctcctccgccacca	SerCGA-1	20a	D-loop	T	0	3.88686	171.667	51.2621	D	NaBH4
G. stearothermophilus	55	cluster44	gccgacttagctcaattggtagagcaactgaatcgtaatcagtaggttgcgggttcaagtcctgcagtcggcaccacca	ThrCGT-2	16	D-loop	T	3.71703506548672e-12	1.67867	290.333	5.98129	D	NaBH4
G. stearothermophilus	55	cluster44	gccgacttagctcaattggtagagcaactgaatcgtaatcagtaggttgcgggttcaagtcctgcagtcggcaccacca	ThrCGT-2	17	D-loop	T	0	5.29214	2394.67	31.1488	D	NaBH4
G. stearothermophilus	55	cluster44	gccgacttagctcaattggtagagcaactgaatcgtaatcagtaggttgcgggttcaagtcctgcagtcggcaccacca	ThrCGT-2	20	D-loop	T	0	3.24459	509	6.05999	D	NaBH4
G. stearothermophilus	70	cluster44	gccgacttagctcaattggtagagcaactgaatcgtaatcagtaggttgcgggttcaagtcctgcagtcggcaccacca	ThrCGT-2	20	D-loop	T	0	2.70719	1015.33	12.7062	D	NaBH4
G. stearothermophilus	70	cluster44	gccgacttagctcaattggtagagcaactgaatcgtaatcagtaggttgcgggttcaagtcctgcagtcggcaccacca	ThrCGT-2	16	D-loop	T	0	1.89116	448.333	14.1564	D	NaBH4
G. stearothermophilus	70	cluster44	gccgacttagctcaattggtagagcaactgaatcgtaatcagtaggttgcgggttcaagtcctgcagtcggcaccacca	ThrCGT-2	17	D-loop	T	0	6.1108	3544.33	51.8403	D	NaBH4
G. stearothermophilus	55	cluster5	ggaggaatacccaagtctggctgaagggggcggtttcgaaaaccgctaggggtgtcacagcccgcgggggttcgaatccctcttcctccgccacca	SerCGA-2	20a	D-loop	T	0	1.34772	23	52.4763	D	NaBH4
G. stearothermophilus	70	cluster5	ggaggaatacccaagtctggctgaagggggcggtttcgaaaaccgctaggggtgtcacagcccgcgggggttcgaatccctcttcctccgccacca	SerCGA-2	20a	D-loop	T	0.000263426	2.138	52.3333	59.0574	D	NaBH4
G. stearothermophilus	55	cluster6	gtcccagtagctcagtaggatagagcagcggccttctaagccgtcggtcgggagttcgagtctctcctgggacgccacca	ArgTCT	20a	D-loop	T	0	3.20632	109.667	11.2469	D	NaBH4
G. stearothermophilus	70	cluster6	gtcccagtagctcagtaggatagagcagcggccttctaagccgtcggtcgggagttcgagtctctcctgggacgccacca	ArgTCT	20a	D-loop	T	0	3.33813	318.667	17.7992	D	NaBH4
G. stearothermophilus	55	cluster7	gccctcgtagtgtagtggatagcacgagagattccggttctcttagcgtgggttcgaatcctgccgagggcgccacca	ArgCCG	20a	D-loop	T	0	3.30183	159.333	12.2755	D	NaBH4
G. stearothermophilus	70	cluster7	gccctcgtagtgtagtggatagcacgagagattccggttctcttagcgtgggttcgaatcctgccgagggcgccacca	ArgCCG	20a	D-loop	T	0	3.66137	314	24.2384	D	NaBH4
G. stearothermophilus	55	cluster8	gccgacttagctcaattggtagagcaactgaatcgtaatcagtaggttgcgggttcgagtcctgcagtcggcaccacca	ThrCGT-1	16	D-loop	T	1.16918903515471e-05	1.51192	153.333	5.65746	D	NaBH4
G. stearothermophilus	55	cluster8	gccgacttagctcaattggtagagcaactgaatcgtaatcagtaggttgcgggttcgagtcctgcagtcggcaccacca	ThrCGT-1	20	D-loop	T	0	3.34728	257.667	6.04908	D	NaBH4
G. stearothermophilus	55	cluster8	gccgacttagctcaattggtagagcaactgaatcgtaatcagtaggttgcgggttcgagtcctgcagtcggcaccacca	ThrCGT-1	17	D-loop	T	0	4.74601	1034.67	26.2569	D	NaBH4
G. stearothermophilus	70	cluster8	gccgacttagctcaattggtagagcaactgaatcgtaatcagtaggttgcgggttcgagtcctgcagtcggcaccacca	ThrCGT-1	17	D-loop	T	0	5.98168	1643	49.5365	D	NaBH4
G. stearothermophilus	70	cluster8	gccgacttagctcaattggtagagcaactgaatcgtaatcagtaggttgcgggttcgagtcctgcagtcggcaccacca	ThrCGT-1	16	D-loop	T	2.01051008278994e-11	1.95816	229.667	14.3893	D	NaBH4
G. stearothermophilus	70	cluster8	gccgacttagctcaattggtagagcaactgaatcgtaatcagtaggttgcgggttcgagtcctgcagtcggcaccacca	ThrCGT-1	20	D-loop	T	0	2.7765	438	11.7946	D	NaBH4
G. stearothermophilus	70	cluster9	ggctcggtagctcagtcggtagagcaaaggactgaaaatccttgtgtcggcggttcgattccgtcccgagccaccacca	PheGAA	20	D-loop	T	0.000263426	1.81032	48	26.0155	D	NaBH4
